# Supplementary material for: Predicted Disease-Specific Immune Infiltration Patterns Decode the Potential Mechanisms of Long Non-Coding RNAs in Primary Sjogren’s Syndrome
Source: Front Immunol. 2021 Apr 14;12:624614. doi: 10.3389/fimmu.2021.624614 (PMC8079748; doi:10.3389/fimmu.2021.624614)
Supplement: Supplementary Table 2 — The predicted relative abundance of 22 types of immune cell estimated by CIRBERSORT. [file Table_2.xlsx]

## Sheet: ImmuneScore
LCP2
LSP1
FYB
PLEK
HCK
IL10RA
LILRB1
NCKAP1L
LAIR1
NCF2
CYBB
PTPRC
IL7R
LAPTM5
CD53
EVI2B
SLA
ITGB2
GIMAP4
MYO1F
HCLS1
MNDA
IL2RG
CD48
AOAH
CCL5
LTB
GMFG
GIMAP6
GZMK
LST1
GPR65
LILRB2
WIPF1
CD37
BIN2
FCER1G
IKZF1
TYROBP
FGL2
FLI1
IRF8
ARHGAP15
SH2B3
TNFRSF1B
DOCK2
CD2
ARHGEF6
CORO1A
LY96
LYZ
ITGAL
TNFAIP3
RNASE6
TGFB1
PSTPIP1
CST7
RGS1
FGR
SELL
MICAL1
TRAF3IP3
ITGA4
MAFB
ARHGDIB
IL4R
RHOH
HLA-DPA1
NKG7
NCF4
LPXN
ITK
SELPLG
HLA-DPB1
CD3D
CD300A
IL2RB
ADCY7
PTGER4
SRGN
CD247
CCR7
MSN
ALOX5AP
PTGER2
RAC2
GBP2
VAV1
CLEC2B
P2RY14
NFKBIA
S100A9
IFI30
MFSD1
RASSF2
TPP1
RHOG
CLEC4A
GZMB
PVRIG
S100A8
CASP1
BCL2A1
HLA-E
KLRB1
GNLY
RAB27A
IL18RAP
TPST2
EMP3
GMIP
LCK
IL32
PTPRCAP
LGALS9
CCDC69
SAMHD1
TAP1
GBP1
CTSS
GZMH
ADAM8
GLRX
PRF1
CD69
HLA-B
HLA-DMA
CD74
KLRK1
PTPRE
HLA-DRA
VNN2
TCIRG1
RABGAP1L
CSTA
ZAP70
HLA-F
HLA-G
CD52
CD302
CD27

## Sheet: Immunostimulator
ULBP1
TNFSF9
TNFSF4
TNFSF18
TNFSF15
TNFSF14
TNFSF13B
TNFSF13
TNFRSF9
TNFRSF8
TNFRSF4
TNFRSF25
TNFRSF18
TNFRSF17
TNFRSF14
TNFRSF13C
TNFRSF13B
TMIGD2
TMEM173
RAET1E
PVR
PDCD1LG2
NT5E
MICB
MICA
LTA
KLRK1
KLRC1
IL6R
IL6
IL2RA
ICOSLG
ICOS
HHLA2
ENTPD1
CXCR4
CXCL12
CD86
CD80
CD70
CD48
CD40LG
CD40
CD28
CD276
CD274
CD27
C10orf54
BTNL2

## Sheet: Immunoinhibitor
VTCN1
TIGIT
TGFBR1
TGFB1
PVRL2
PDCD1
LGALS9
LAG3
KIR2DL3
KIR2DL2
KIR2DL1
KDR
IL10RB
IL10
IDO1
HAVCR2
CTLA4
CSF1R
CD96
CD244
CD160
BTLA
ADORA2A
