# Supplementary material for: Predicted Disease-Specific Immune Infiltration Patterns Decode the Potential Mechanisms of Long Non-Coding RNAs in Primary Sjogren’s Syndrome
Source: Front Immunol. 2021 Apr 14;12:624614. doi: 10.3389/fimmu.2021.624614 (PMC8079748; doi:10.3389/fimmu.2021.624614)
Supplement: Supplementary Table 7 — The gene modules and genes identified by WGCNA. [file Table_7.xlsx]

## Sheet: Sheet1
probes	moduleColor	GS.pSSctl	p.GS.pSSctl	GS.siccactl	p.GS.siccactl	GS.pSSsicca	p.GS.pSSsicca	GS.P	p.GS.P	GS.T1	p.GS.T1	GS.T4	p.GS.T4	GS.T7	p.GS.T7	GS.NK1	p.GS.NK1	GS.Mono	p.GS.Mono	GS.M1	p.GS.M1	GS.M2	p.GS.M2	GS.D2	p.GS.D2	GS.N	p.GS.N	MMturquoise	p.MMturquoise	MMblue	p.MMblue	MMdarkgreen	p.MMdarkgreen	MMdarkorange	p.MMdarkorange	MMlightgreen	p.MMlightgreen	MMgrey	p.MMgrey
SERPINB9	blue	0.689318	4.33014e-08	-0.30688	0.0319723	0.900124	1.39933e-18	-0.698927	2.3345e-08	-0.650559	4.19328e-07	0.550633	4.14319e-05	0.737729	1.47491e-09	-0.502176	0.00023642	-0.44961	0.00119117	0.374115	0.00809392	0.480246	0.000479065	-0.416664	0.00290059	-0.0982327	0.501899	0.406103	0.00378871	0.835649	8.08235e-14	-0.611078	3.10948e-06	0.193542	0.18271	-0.0604588	0.679853	0.755964	3.38788e-10
CARD8	blue	0.521201	0.000123119	-0.275711	0.0551738	0.726633	3.4071e-09	-0.707611	1.30785e-08	-0.471021	0.000635908	0.610787	3.15252e-06	0.590485	7.96874e-06	-0.345062	0.0151749	-0.340144	0.0167875	0.330791	0.020258	0.321929	0.0240863	-0.00134145	0.992701	-0.0144778	0.92135	0.298555	0.0371858	0.759783	2.44957e-10	-0.577716	1.38367e-05	0.0482828	0.741818	0.0572758	0.69587	0.837287	6.50964e-14
PTPRC	blue	0.815276	9.91667e-13	-0.125495	0.390234	0.870759	4.27811e-16	-0.702126	1.89035e-08	-0.487543	0.000380726	0.633213	1.04685e-06	0.820107	5.63104e-13	-0.537064	6.93196e-05	-0.362175	0.0105506	0.476964	0.000530338	0.584214	1.04798e-05	-0.459966	0.000883755	-0.3188	0.0255755	0.1212	0.406785	0.93361	1.38402e-22	-0.427895	0.00216277	0.443309	0.00142196	0.202815	0.162225	0.83691	6.84398e-14
MS4A1	blue	0.715302	7.69195e-09	-0.527826	9.71925e-05	0.922994	4.01422e-21	-0.707379	1.32866e-08	-0.70261	1.83055e-08	0.573004	1.68631e-05	0.81919	6.27757e-13	-0.603652	4.39907e-06	-0.548992	4.41446e-05	0.442573	0.00145136	0.530251	8.90257e-05	-0.451079	0.00114245	0.0971903	0.50647	0.40544	0.00385167	0.862193	1.75146e-15	-0.556686	3.26943e-05	0.269719	0.0609041	-0.105031	0.472617	0.704028	1.6652e-08
C7	blue	0.827498	2.29164e-13	-0.0462525	0.752322	0.892114	7.83131e-18	-0.617259	2.31361e-06	-0.390557	0.00552945	0.520416	0.000126573	0.680805	7.34181e-08	-0.468567	0.000684762	-0.360383	0.0109697	0.44942	0.00119761	0.641823	6.69528e-07	-0.412329	0.00324002	-0.376704	0.00763216	0.158284	0.277369	0.845629	2.08263e-14	-0.387746	0.00590963	0.489025	0.000363141	0.0654967	0.654787	0.662877	2.11202e-07
GLCCI1	blue	0.562413	2.6018e-05	-0.143102	0.326634	0.555955	3.36514e-05	-0.650301	4.25237e-07	-0.254529	0.0775798	0.550095	4.23036e-05	0.696388	2.75476e-08	-0.403563	0.004035	-0.22408	0.121664	0.436186	0.0017302	0.560001	2.86602e-05	-0.286786	0.0457319	-0.447633	0.00125969	-0.161248	0.268356	0.812964	1.29263e-12	-0.195791	0.177578	0.432062	0.00193464	0.515913	0.000148174	0.906748	3.00627e-19
COMMD8	blue	0.571567	1.79008e-05	-0.0310579	0.832229	0.557363	3.18299e-05	-0.681359	7.09766e-08	-0.419337	0.00270729	0.549923	4.2586e-05	0.70845	1.23531e-08	-0.464139	0.00078151	-0.190235	0.190446	0.315029	0.0274718	0.322681	0.0237395	-0.035833	0.806894	-0.187105	0.19798	0.0193305	0.895117	0.794463	9.52411e-12	-0.433815	0.00184526	0.197435	0.173896	0.334533	0.0188028	0.923812	3.15226e-21
PTGER4	blue	0.595449	6.38923e-06	-0.344419	0.015378	0.772316	8.09138e-11	-0.68622	5.25823e-08	-0.36464	0.00999641	0.701773	1.93514e-08	0.722988	4.44655e-09	-0.369858	0.00890599	-0.227743	0.115532	0.343887	0.0155478	0.358991	0.011305	-0.335488	0.0184461	-0.307938	0.031356	0.0412968	0.778147	0.898071	2.20555e-18	-0.394999	0.00497223	0.310722	0.0297797	0.211934	0.143768	0.894903	4.36785e-18
LBR	blue	0.525843	0.000104376	-0.11875	0.416407	0.594257	6.73963e-06	-0.61477	2.60807e-06	-0.230559	0.11098	0.552713	3.82131e-05	0.744014	9.00783e-10	-0.42573	0.00229041	-0.222436	0.124495	0.395627	0.00489748	0.497185	0.000278811	-0.367138	0.00946077	-0.431914	0.0019424	-0.193524	0.18275	0.876336	1.61732e-16	-0.155926	0.284681	0.554325	3.58776e-05	0.488238	0.000372388	0.832958	1.14711e-13
ENPP2	blue	0.715087	7.80843e-09	0.260937	0.0701524	0.662327	2.17922e-07	-0.645799	5.42097e-07	-0.340631	0.0166219	0.585038	1.01122e-05	0.796401	7.80163e-12	-0.585394	9.95773e-06	-0.360988	0.0108264	0.528648	9.43536e-05	0.61234	2.92877e-06	-0.355153	0.0122756	-0.35338	0.0127476	-0.0947322	0.517331	0.901041	1.13836e-18	-0.239071	0.0980496	0.582552	1.12581e-05	0.347025	0.0145692	0.800834	4.90204e-12
ZEB2	blue	0.551863	3.95003e-05	-0.101317	0.488498	0.654035	3.4663e-07	-0.678157	8.62136e-08	-0.384061	0.00644235	0.70268	1.82198e-08	0.668222	1.55297e-07	-0.206349	0.154877	-0.337072	0.0178668	0.372935	0.00831228	0.360564	0.0109266	-0.311193	0.0295198	-0.0949131	0.516528	0.14054	0.33546	0.828465	2.03089e-13	-0.446948	0.00128425	0.16888	0.246051	0.0898672	0.539166	0.830156	1.64112e-13
C21orf91	blue	0.594365	6.70708e-06	-0.457731	0.000943328	0.720436	5.34468e-09	-0.633806	1.01554e-06	-0.507067	0.000200641	0.54295	5.56004e-05	0.64507	5.63603e-07	-0.355662	0.0121429	-0.29052	0.0428619	0.330404	0.0204135	0.326937	0.0218543	-0.178796	0.218999	-0.25963	0.0716202	0.256329	0.0754341	0.765323	1.51384e-10	-0.583209	1.09439e-05	0.0925776	0.526946	0.128545	0.378725	0.893456	5.92535e-18
KPNA2	blue	0.577022	1.42479e-05	0.0417475	0.775788	0.522272	0.000118539	-0.516411	0.000145628	-0.230962	0.110339	0.525273	0.000106525	0.675439	1.01504e-07	-0.482208	0.000450594	-0.213827	0.14014	0.511237	0.000174106	0.549627	4.30776e-05	-0.332522	0.0195732	-0.445268	0.00134627	-0.211041	0.145502	0.817726	7.45824e-13	-0.114712	0.432542	0.531251	8.58464e-05	0.496907	0.000281367	0.829727	1.73268e-13
CENPK	blue	0.541161	5.94819e-05	-0.452517	0.00109646	0.865716	9.92537e-16	-0.659213	2.59855e-07	-0.618493	2.1794e-06	0.51722	0.000141581	0.683554	6.20276e-08	-0.367549	0.00937506	-0.432579	0.0019079	0.321602	0.0242383	0.265941	0.0647549	-0.28248	0.0492328	0.173983	0.231857	0.543458	5.45408e-05	0.7558	3.43499e-10	-0.725417	3.72533e-09	-0.0436976	0.765605	-0.264898	0.0658524	0.696558	2.72468e-08
CLEC4A	blue	0.445231	0.00134767	-0.514783	0.000154094	0.874903	2.0856e-16	-0.58809	8.85342e-06	-0.650005	4.32145e-07	0.461942	0.000833938	0.562653	2.5768e-05	-0.316792	0.0265711	-0.523252	0.000114485	0.228585	0.114156	0.228234	0.114728	-0.19145	0.187577	0.341247	0.0164139	0.602051	4.73531e-06	0.715076	7.81446e-09	-0.782971	2.98177e-11	-0.100894	0.490325	-0.305252	0.0329415	0.695445	2.92834e-08
KIAA0226L	blue	0.696887	2.66709e-08	-0.500162	0.000252765	0.873787	2.5371e-16	-0.693663	3.28445e-08	-0.612727	2.8754e-06	0.684385	5.89268e-08	0.842401	3.26229e-14	-0.579287	1.29443e-05	-0.544131	5.31678e-05	0.48569	0.000403791	0.508972	0.000188092	-0.405536	0.00384247	-0.0363111	0.804368	0.349718	0.013772	0.903883	5.9266e-19	-0.595009	6.51659e-06	0.250991	0.0819385	0.00090091	0.995098	0.837351	6.45507e-14
SEL1L3	blue	0.460857	0.000860983	-0.336821	0.0179577	0.58222	1.14196e-05	-0.535556	7.33016e-05	-0.241339	0.0948096	0.581214	1.1923e-05	0.706416	1.41817e-08	-0.453053	0.00107973	-0.264504	0.0662701	0.483123	0.000437841	0.530014	8.97953e-05	-0.279556	0.0517325	-0.339344	0.0170631	-0.194636	0.1802	0.863302	1.46727e-15	-0.106264	0.467407	0.553611	3.68963e-05	0.509206	0.000186602	0.856594	4.18631e-15
CR1	blue	0.528802	9.38278e-05	-0.475312	0.000557961	0.924468	2.59173e-21	-0.598355	5.60456e-06	-0.676482	9.536e-08	0.488618	0.0003679	0.613744	2.73924e-06	-0.391981	0.0053452	-0.508101	0.000193743	0.213855	0.140087	0.206662	0.154238	-0.282296	0.0493874	0.17747	0.222491	0.566057	2.24493e-05	0.736161	1.66434e-09	-0.719495	5.7168e-09	-0.00893117	0.951435	-0.299152	0.0367902	0.6203	1.99583e-06
BMP2K	blue	0.447702	0.00125723	-0.277559	0.0534979	0.577778	1.38e-05	-0.679001	8.19254e-08	-0.301793	0.0350805	0.596779	6.01822e-06	0.78747	1.9233e-11	-0.513351	0.000161906	-0.234333	0.105094	0.461193	0.000852526	0.459404	0.000898425	-0.307865	0.0313981	-0.20602	0.15555	-0.0777619	0.595359	0.841569	3.65672e-14	-0.241455	0.0946464	0.386881	0.00603114	0.345966	0.0148936	0.875853	1.76252e-16
RGS1	blue	0.65573	3.15628e-07	-0.702222	1.87832e-08	0.878865	1.02439e-16	-0.700473	2.10885e-08	-0.48699	0.000387479	0.595679	6.32362e-06	0.722133	4.73029e-09	-0.579202	1.29914e-05	-0.36411	0.0101134	0.580581	1.22499e-05	0.574632	1.57542e-05	-0.199354	0.169664	-0.207298	0.152946	0.283986	0.0479842	0.806917	2.54194e-12	-0.503507	0.000226151	0.251479	0.0813264	0.114758	0.432355	0.790757	1.38685e-11
PSIP1	blue	0.510666	0.000177538	-0.137168	0.347299	0.57601	1.4869e-05	-0.519952	0.000128657	-0.207068	0.153413	0.522814	0.000116284	0.713583	8.674e-09	-0.446868	0.00128713	-0.153482	0.29239	0.431106	0.00198501	0.446804	0.00128946	-0.286969	0.0455871	-0.437309	0.00167797	-0.187	0.198237	0.839251	5.00703e-14	-0.216759	0.134656	0.463226	0.000802932	0.512305	0.000167842	0.875824	1.77171e-16
TNFAIP8	blue	0.697911	2.49495e-08	-0.37783	0.00743851	0.816454	8.65177e-13	-0.715188	7.75334e-09	-0.468494	0.000686273	0.64589	5.39459e-07	0.821484	4.77755e-13	-0.577931	1.3711e-05	-0.373793	0.00815302	0.435368	0.00176916	0.512467	0.000166912	-0.325778	0.0223549	-0.242584	0.0930663	0.085785	0.557825	0.961915	4.03015e-28	-0.418366	0.00277615	0.400654	0.00433429	0.228268	0.114673	0.90776	2.35334e-19
PBK	blue	0.483476	0.00043301	-0.374917	0.00794847	0.793592	1.04115e-11	-0.558027	3.1003e-05	-0.532468	8.21144e-05	0.399078	0.0045044	0.48497	0.000413097	-0.288309	0.0445432	-0.405944	0.00380372	0.26794	0.0626934	0.210261	0.147031	-0.23114	0.110058	0.27168	0.0589785	0.525599	0.000105293	0.675471	1.01307e-07	-0.704435	1.62047e-08	-0.0783166	0.592728	-0.340711	0.0165946	0.639014	7.75801e-07
PAPSS2	blue	0.561511	2.69784e-05	0.0526223	0.719524	0.574263	1.59993e-05	-0.649179	4.51927e-07	-0.412001	0.00326709	0.669689	1.42568e-07	0.761899	2.04148e-10	-0.417156	0.00286412	-0.316201	0.0268702	0.47127	0.000631139	0.467174	0.00071397	-0.409169	0.00350907	-0.109701	0.453042	-0.00148431	0.991924	0.869181	5.58746e-16	-0.316542	0.0266972	0.356699	0.0118764	0.230589	0.110932	0.838061	5.87302e-14
IKZF1	blue	0.707584	1.31024e-08	-0.358007	0.0115473	0.859996	2.47654e-15	-0.677195	9.13625e-08	-0.516228	0.000146558	0.693218	3.37951e-08	0.816769	8.33986e-13	-0.513424	0.000161503	-0.398237	0.00459761	0.489363	0.000359233	0.520343	0.000126899	-0.433625	0.00185479	-0.143072	0.326738	0.172322	0.236415	0.95351	3.98505e-26	-0.43824	0.00163575	0.374445	0.00803388	0.0930047	0.525033	0.832278	1.25199e-13
FGL2	blue	0.584967	1.01437e-05	0.0365965	0.802861	0.570889	1.84103e-05	-0.54671	4.81891e-05	-0.333236	0.0192968	0.508611	0.000190416	0.840348	4.31768e-14	-0.511265	0.000173938	-0.31186	0.0291548	0.39728	0.00470559	0.466841	0.000721109	-0.325422	0.0225106	-0.242896	0.092633	-0.119672	0.41277	0.867058	7.96059e-16	-0.231448	0.109572	0.522672	0.000116868	0.453231	0.00107424	0.793153	1.08864e-11
FCRL3	blue	0.683747	6.12932e-08	-0.487231	0.000384529	0.903829	6.00172e-19	-0.732336	2.22696e-09	-0.640212	7.28694e-07	0.56274	2.56778e-05	0.810874	1.6374e-12	-0.566366	2.21684e-05	-0.458073	0.000933972	0.560946	2.75966e-05	0.567717	2.09784e-05	-0.390912	0.00548305	-0.00469978	0.974433	0.394491	0.00503334	0.876631	1.53405e-16	-0.563142	2.52647e-05	0.286775	0.04574	-0.0591891	0.686226	0.723442	4.30273e-09
OSBPL3	blue	0.561683	2.67934e-05	-0.526711	0.000101173	0.86372	1.37201e-15	-0.60222	4.6988e-06	-0.591038	7.77638e-06	0.54602	4.94786e-05	0.702426	1.85302e-08	-0.362012	0.010588	-0.495264	0.00029689	0.296338	0.0386865	0.321019	0.0245118	-0.304304	0.0335168	-0.0983662	0.501315	0.408294	0.00358699	0.789104	1.63587e-11	-0.591451	7.63572e-06	0.12349	0.397913	-0.0801618	0.584015	0.723451	4.29982e-09
DAPP1	blue	0.581455	1.18005e-05	-0.161247	0.268358	0.716082	7.28167e-09	-0.72208	4.74856e-09	-0.309637	0.0303858	0.575365	1.52773e-05	0.712266	9.50456e-09	-0.347346	0.0144722	-0.243285	0.0920956	0.272313	0.0583676	0.38671	0.0060553	-0.20903	0.149467	-0.237562	0.100253	0.00863427	0.953047	0.874919	2.07995e-16	-0.348502	0.0141273	0.338554	0.0173391	0.19293	0.184124	0.844112	2.57479e-14
CR2	blue	0.752361	4.57628e-10	-0.364713	0.00998045	0.851193	9.37515e-15	-0.736006	1.68427e-09	-0.540111	6.18727e-05	0.693622	3.2931e-08	0.868147	6.64368e-16	-0.560163	2.84755e-05	-0.381356	0.00685951	0.536592	7.0544e-05	0.602544	4.62926e-06	-0.444418	0.00137868	-0.164354	0.259122	0.14351	0.325244	0.967162	1.31051e-29	-0.397832	0.004643	0.460442	0.000871517	0.161885	0.266442	0.825542	2.91914e-13
RAPGEF6	blue	0.570895	1.84062e-05	0.0200616	0.891174	0.556302	3.3194e-05	-0.717945	6.38348e-09	-0.296955	0.0382639	0.619073	2.11886e-06	0.710638	1.06346e-08	-0.451411	0.00113167	-0.188256	0.195186	0.454426	0.00103799	0.520344	0.000126896	-0.135169	0.354439	-0.33909	0.0171517	-0.137662	0.345548	0.84323	2.90998e-14	-0.229397	0.112842	0.428344	0.00213706	0.489717	0.000355184	0.902431	8.29307e-19
RGS13	blue	0.648215	4.76112e-07	-0.433129	0.00187981	0.804635	3.26068e-12	-0.713	9.03231e-09	-0.534007	7.76081e-05	0.530422	8.84748e-05	0.643496	6.12829e-07	-0.431889	0.00194367	-0.405983	0.00380004	0.450767	0.00115262	0.486346	0.000395491	-0.363307	0.0102928	-0.0153975	0.916371	0.30892	0.0307922	0.862676	1.62193e-15	-0.501678	0.000240377	0.266474	0.0642004	-0.060177	0.681265	0.745083	8.27168e-10
ADAMDEC1	blue	0.702094	1.89434e-08	-0.484312	0.000421766	0.947735	5.85899e-25	-0.702978	1.78615e-08	-0.680152	7.63969e-08	0.615251	2.54864e-06	0.756796	3.15854e-10	-0.514164	0.000157426	-0.50101	0.000245763	0.420507	0.00262633	0.432727	0.00190033	-0.313187	0.0284401	0.134268	0.357685	0.492983	0.000319723	0.823659	3.67451e-13	-0.647188	5.03179e-07	0.136476	0.349759	-0.228729	0.113922	0.678203	8.59746e-08
TFEC	blue	0.483305	0.00043534	-0.568967	1.99294e-05	0.810335	1.73951e-12	-0.549418	4.34261e-05	-0.590967	7.8011e-06	0.476408	0.000539485	0.707852	1.28662e-08	-0.350192	0.0136356	-0.40931	0.00349664	0.182581	0.20924	0.200833	0.166456	-0.343045	0.0158197	0.204405	0.158888	0.495891	0.000290878	0.726436	3.45697e-09	-0.659784	2.51636e-07	0.0302493	0.836536	-0.203392	0.161009	0.647512	4.9448e-07
LOC100505812	blue	0.612835	2.86068e-06	-0.422221	0.0025116	0.848324	1.42048e-14	-0.665739	1.7928e-07	-0.61393	2.71506e-06	0.606225	3.90459e-06	0.739733	1.26223e-09	-0.429096	0.00209471	-0.428416	0.00213298	0.392123	0.00532707	0.359803	0.0111084	-0.306349	0.0322861	0.0311558	0.831708	0.425233	0.00232066	0.84272	3.12241e-14	-0.677515	8.96178e-08	0.0991531	0.497881	-0.114928	0.43167	0.791512	1.2855e-11
PTPLAD2	blue	0.516576	0.000144796	-0.460464	0.000870966	0.769578	1.03673e-10	-0.726999	3.31646e-09	-0.556122	3.34297e-05	0.672289	1.22375e-07	0.768268	1.16593e-10	-0.396147	0.00483641	-0.361794	0.0106383	0.353523	0.012709	0.284446	0.0476086	-0.275767	0.0551224	0.161559	0.267421	0.357677	0.0116297	0.814463	1.08902e-12	-0.60527	4.08181e-06	0.0840658	0.565773	-0.151789	0.29781	0.750421	5.36898e-10
FAS	blue	0.520439	0.000126471	-0.272076	0.0585953	0.703079	1.77418e-08	-0.697058	2.63755e-08	-0.451236	0.00113733	0.594837	6.56714e-06	0.746489	7.38904e-10	-0.3726	0.00837525	-0.352721	0.012927	0.455789	0.00099795	0.447574	0.0012618	-0.463744	0.000790734	0.0627328	0.668494	0.226655	0.117328	0.826149	2.70859e-13	-0.456775	0.00096987	0.236737	0.101473	-0.0671813	0.646487	0.74835	6.35698e-10
CYSLTR1	blue	0.535064	7.46446e-05	-0.359264	0.0112385	0.81542	9.7531e-13	-0.656919	2.95433e-07	-0.582582	1.12434e-05	0.447004	0.0012822	0.740791	1.16198e-09	-0.364576	0.0100105	-0.452961	0.0010826	0.235965	0.102626	0.324147	0.0230754	-0.432137	0.00193073	0.101291	0.488614	0.468006	0.000696402	0.738756	1.36203e-09	-0.609477	3.35346e-06	0.0706544	0.62951	-0.204883	0.157894	0.643922	5.99136e-07
ITK	blue	0.635849	9.14257e-07	-0.427365	0.00219339	0.87087	4.19748e-16	-0.706867	1.3756e-08	-0.617421	2.29559e-06	0.665495	1.81811e-07	0.801144	4.74365e-12	-0.535992	7.2129e-05	-0.448288	0.00123663	0.394488	0.00503375	0.385517	0.0062271	-0.39866	0.00455055	0.0367016	0.802306	0.309659	0.0303737	0.900987	1.15231e-18	-0.545803	4.98899e-05	0.25507	0.0769305	-0.051571	0.724904	0.765189	1.53184e-10
SWAP70	blue	0.513986	0.000158402	0.00314273	0.982902	0.511291	0.000173783	-0.582227	1.14161e-05	-0.19568	0.177829	0.51824	0.000136623	0.703706	1.70153e-08	-0.364224	0.0100883	-0.15263	0.295108	0.445245	0.00134713	0.434787	0.00179729	-0.317706	0.0261138	-0.472368	0.000610442	-0.258275	0.0731664	0.845472	2.12901e-14	-0.149656	0.304731	0.467984	0.000696855	0.487848	0.000377049	0.893287	6.13818e-18
MYB	blue	0.63763	8.33744e-07	-0.472495	0.000608089	0.845382	2.15614e-14	-0.528724	9.40925e-05	-0.526856	0.00010065	0.61585	2.47629e-06	0.573145	1.67642e-05	-0.295963	0.0389452	-0.413907	0.0031126	0.319399	0.0252844	0.270245	0.0603825	-0.315243	0.0273612	0.0719218	0.623361	0.47675	0.00053384	0.728391	2.99194e-09	-0.657178	2.91198e-07	0.0356421	0.807904	-0.241957	0.0939417	0.659504	2.55632e-07
TAGAP	blue	0.503926	0.000223004	-0.493562	0.000313782	0.883534	4.28979e-17	-0.590814	7.85399e-06	-0.639387	7.60843e-07	0.538081	6.67475e-05	0.684422	5.87914e-08	-0.417532	0.00283649	-0.46773	0.000702191	0.325361	0.0225373	0.261185	0.0698776	-0.253646	0.07865	0.282513	0.049205	0.536882	6.97884e-05	0.760179	2.3678e-10	-0.683166	6.3527e-08	0.00247157	0.986553	-0.277013	0.0539888	0.65731	2.8906e-07
ZDHHC20	blue	0.413337	0.0031581	0.146852	0.313984	0.316879	0.026527	-0.530666	8.76924e-05	-0.189531	0.192122	0.565018	2.34181e-05	0.670653	1.34743e-07	-0.313934	0.0280436	-0.17024	0.242211	0.293799	0.0404654	0.313792	0.0281186	-0.166975	0.251497	-0.299901	0.0362981	-0.306018	0.0324828	0.74934	5.86504e-10	-0.107503	0.462201	0.375013	0.00793114	0.593109	7.09371e-06	0.853477	6.69328e-15
PARP14	blue	0.653595	3.55127e-07	-0.0412478	0.778403	0.641494	6.81233e-07	-0.506662	0.000203405	-0.271706	0.0589534	0.42699	0.00221534	0.678588	8.3997e-08	-0.472671	0.00060485	-0.206793	0.15397	0.587633	9.0324e-06	0.612478	2.90958e-06	-0.530978	8.67044e-05	-0.397397	0.00469235	-0.149974	0.303693	0.831559	1.37285e-13	-0.0911417	0.533403	0.619051	2.12108e-06	0.287352	0.0452872	0.709323	1.16384e-08
LEPROTL1	blue	0.50265	0.000232714	-0.311298	0.0294618	0.624626	1.61301e-06	-0.54489	5.16554e-05	-0.305082	0.0330439	0.576986	1.42698e-05	0.769124	1.07986e-10	-0.443369	0.00141958	-0.220882	0.127218	0.445976	0.00131981	0.474929	0.000564563	-0.368979	0.0090821	-0.348373	0.0141655	-0.059851	0.682901	0.821085	5.01122e-13	-0.277315	0.0537168	0.443714	0.00140602	0.430483	0.00201842	0.834718	9.12965e-14
TRAF3IP3	blue	0.633803	1.01569e-06	-0.158555	0.276537	0.737154	1.54182e-09	-0.642978	6.29887e-07	-0.369035	0.00907078	0.686225	5.25649e-08	0.794605	9.38689e-12	-0.46333	0.000800467	-0.344274	0.0154242	0.545767	4.99573e-05	0.541853	5.79526e-05	-0.495157	0.000297921	-0.306783	0.0320294	-0.0269476	0.854173	0.937008	4.18249e-23	-0.227272	0.116307	0.529048	9.29957e-05	0.267353	0.0632941	0.801182	4.72455e-12
EML6	blue	0.568297	2.04851e-05	-0.333711	0.0191148	0.759405	2.53021e-10	-0.689925	4.16731e-08	-0.420073	0.00265611	0.619569	2.06833e-06	0.705491	1.50952e-08	-0.363325	0.0102888	-0.397141	0.00472147	0.393421	0.00516423	0.349641	0.0137943	-0.280657	0.0507794	-0.104558	0.474625	0.196317	0.176395	0.892443	7.31627e-18	-0.497496	0.000275979	0.208601	0.150324	0.0239596	0.870195	0.85922	2.79478e-15
TOX	blue	0.683851	6.09016e-08	-0.424449	0.00236905	0.861515	1.95034e-15	-0.680808	7.34016e-08	-0.564088	2.43179e-05	0.570062	1.90502e-05	0.760993	2.2077e-10	-0.388806	0.00576367	-0.486072	0.000398942	0.463015	0.000807949	0.50612	0.000207159	-0.39703	0.00473424	-0.0250041	0.864588	0.342818	0.0158938	0.891014	9.81639e-18	-0.573715	1.63706e-05	0.230412	0.111214	-0.0288749	0.843869	0.804824	3.19463e-12
ZNF367	blue	0.495362	0.000295938	-0.43981	0.00156665	0.819979	5.71771e-13	-0.59296	7.14089e-06	-0.625897	1.51426e-06	0.423505	0.00242858	0.582527	1.127e-05	-0.333552	0.0191756	-0.461111	0.000854573	0.153429	0.29256	0.237916	0.0997327	-0.269536	0.0610863	0.233988	0.105623	0.577936	1.37084e-05	0.700947	2.04388e-08	-0.765726	1.46113e-10	-0.0748623	0.609193	-0.279942	0.0513963	0.657731	2.82346e-07
ELK3	blue	0.633768	1.01752e-06	-0.248939	0.0845535	0.733599	2.02399e-09	-0.562053	2.6398e-05	-0.497822	0.000273041	0.587095	9.24729e-06	0.794643	9.35017e-12	-0.461947	0.000833833	-0.43507	0.00178356	0.279424	0.0518477	0.380323	0.00702503	-0.27711	0.0539006	-0.029695	0.839492	0.142221	0.329651	0.85684	4.03245e-15	-0.480646	0.000473131	0.255623	0.0762706	0.223389	0.122848	0.863421	1.43945e-15
TLR8	blue	0.683091	6.38208e-08	-0.368521	0.00917516	0.880869	7.0824e-17	-0.635783	9.17411e-07	-0.588167	8.82357e-06	0.526451	0.000102122	0.805534	2.95736e-12	-0.550543	4.15777e-05	-0.455147	0.00101663	0.381846	0.00678226	0.43641	0.00171968	-0.338184	0.0174697	0.000818291	0.995548	0.418043	0.00279941	0.831641	1.3586e-13	-0.604193	4.29047e-06	0.225867	0.118643	-0.0836954	0.567493	0.697839	2.50667e-08
IGDCC4	blue	0.614282	2.66977e-06	-0.152055	0.296953	0.801338	4.64663e-12	-0.584817	1.02099e-05	-0.557356	3.18393e-05	0.549201	4.37915e-05	0.660716	2.3875e-07	-0.365713	0.00976335	-0.501544	0.000241443	0.277301	0.0537291	0.298258	0.0373837	-0.270085	0.060541	0.0797763	0.585831	0.420183	0.0026485	0.755073	3.65108e-10	-0.656786	2.97635e-07	0.0262958	0.857663	-0.174087	0.231576	0.68854	4.54749e-08
EVI2A	blue	0.717431	6.62026e-09	-0.347611	0.0143926	0.838352	5.64894e-14	-0.669726	1.42258e-07	-0.541945	5.77513e-05	0.651409	4.00339e-07	0.844927	2.29834e-14	-0.523084	0.000115172	-0.396005	0.0048531	0.4345	0.00181136	0.442441	0.00145671	-0.346058	0.0148651	-0.24702	0.0870571	0.178056	0.220944	0.92984	4.86083e-22	-0.49969	0.000256745	0.347899	0.0143062	0.206023	0.155543	0.867471	7.43453e-16
SPATA13	blue	0.489034	0.000363033	-0.247054	0.0870115	0.594199	6.75714e-06	-0.599285	5.3729e-06	-0.303498	0.0340121	0.628999	1.29635e-06	0.748007	6.53623e-10	-0.379993	0.00707855	-0.266767	0.063897	0.40995	0.00344078	0.327432	0.0216437	-0.288451	0.044433	-0.324788	0.0227899	-0.0763244	0.6022	0.858395	3.176e-15	-0.309625	0.0303924	0.309235	0.0306131	0.35492	0.0123369	0.925492	1.90196e-21
DCP2	blue	0.519431	0.000131038	-0.196803	0.175303	0.599023	5.43724e-06	-0.388976	0.00574058	-0.206352	0.15487	0.470056	0.000654741	0.641151	6.93633e-07	-0.38239	0.00669733	-0.212068	0.143509	0.51126	0.000173965	0.485403	0.000407473	-0.244039	0.0910608	-0.553635	3.68606e-05	-0.163362	0.262046	0.806247	2.73568e-12	-0.169069	0.245513	0.508212	0.00019301	0.536274	7.13788e-05	0.849023	1.28483e-14
TNFSF13B	blue	0.550213	4.21119e-05	-0.111303	0.446433	0.581179	1.19406e-05	-0.623555	1.70089e-06	-0.294527	0.0399488	0.606133	3.92147e-06	0.836748	6.99181e-14	-0.608677	3.48182e-06	-0.263561	0.0672793	0.53676	7.01055e-05	0.555982	3.3615e-05	-0.270083	0.060543	-0.321395	0.0243351	-0.188532	0.194521	0.906217	3.41481e-19	-0.145461	0.318639	0.561982	2.64732e-05	0.468251	0.000691284	0.877366	1.34443e-16
RALGPS2	blue	0.634201	9.95173e-07	-0.316032	0.0269565	0.736652	1.60259e-09	-0.695261	2.96324e-08	-0.389205	0.0057095	0.666662	1.69983e-07	0.872354	3.25429e-16	-0.546658	4.82862e-05	-0.312223	0.0289578	0.503519	0.00022606	0.551881	3.94719e-05	-0.405708	0.00382613	-0.222623	0.124171	-0.0103568	0.943694	0.96472	6.88648e-29	-0.288501	0.0443947	0.506663	0.000203399	0.303097	0.0342611	0.876624	1.53602e-16
KIAA0125	blue	0.624225	1.6454e-06	-0.524174	0.00011079	0.83758	6.26129e-14	-0.531605	8.47434e-05	-0.484803	0.000415273	0.602425	4.6548e-06	0.729321	2.79203e-09	-0.386293	0.00611495	-0.524523	0.000109419	0.542594	5.63528e-05	0.545794	4.99066e-05	-0.472665	0.000604957	-0.034927	0.811687	0.274041	0.0567255	0.846203	1.92093e-14	-0.401328	0.00426323	0.355048	0.0123032	-0.0200135	0.891433	0.664087	1.97112e-07
GIMAP6	blue	0.618365	2.19297e-06	-0.174265	0.231092	0.779143	4.29507e-11	-0.726624	3.40956e-09	-0.506696	0.000203171	0.526365	0.000102438	0.799655	5.55326e-12	-0.633933	1.00894e-06	-0.436015	0.0017383	0.369252	0.00902717	0.456539	0.000976524	-0.265051	0.0656907	0.0333676	0.819952	0.206197	0.155187	0.898486	2.01329e-18	-0.490714	0.000344001	0.291823	0.0418962	0.00431475	0.976527	0.784353	2.60879e-11
CDC7	blue	0.363494	0.0102508	-0.508369	0.000191986	0.757803	2.90019e-10	-0.667783	1.59307e-07	-0.53599	7.21338e-05	0.571112	1.82415e-05	0.632664	1.07659e-06	-0.368775	0.00912335	-0.423493	0.00242931	0.241729	0.0942607	0.18028	0.215136	-0.186975	0.198298	0.0993205	0.497152	0.377327	0.00752451	0.769819	1.01447e-10	-0.628312	1.34197e-06	-0.00590797	0.967863	-0.0307246	0.834004	0.798909	6.0065e-12
UGCG	blue	0.500557	0.000249482	-0.245356	0.0892749	0.613378	2.78752e-06	-0.568983	1.99158e-05	-0.205634	0.156343	0.556871	3.24559e-05	0.695493	2.91932e-08	-0.419084	0.00272509	-0.124326	0.3947	0.420765	0.00260874	0.495919	0.000290608	-0.295209	0.0394694	-0.473663	0.000586844	-0.208652	0.150223	0.830567	1.5578e-13	-0.125518	0.390147	0.560159	2.84793e-05	0.55662	3.27788e-05	0.83808	5.85825e-14
CD93	blue	0.527879	9.70087e-05	-0.399546	0.00445329	0.638636	7.91232e-07	-0.430767	0.00200315	-0.344003	0.0155106	0.380512	0.0069944	0.701321	1.99394e-08	-0.547128	4.74253e-05	-0.332434	0.0196078	0.448438	0.00123138	0.500036	0.000253824	-0.465744	0.000745108	-0.336163	0.0181975	-0.0316609	0.82902	0.836728	7.0109e-14	-0.185843	0.201077	0.572621	1.71342e-05	0.295021	0.0396008	0.716011	7.31815e-09
SH2D1A	blue	0.628754	1.31244e-06	-0.381969	0.00676304	0.76788	1.20698e-10	-0.651479	3.98812e-07	-0.487719	0.000378602	0.493816	0.000311202	0.842955	3.0226e-14	-0.549404	4.34492e-05	-0.41354	0.00314181	0.425601	0.00229822	0.380582	0.00698317	-0.29411	0.0402439	-0.147084	0.31321	0.221097	0.126838	0.86276	1.60012e-15	-0.454249	0.00104328	0.281781	0.0498212	0.0825422	0.572861	0.750243	5.44783e-10
TARP	blue	0.507551	0.000197385	-0.359933	0.011077	0.719696	5.63536e-09	-0.563891	2.45126e-05	-0.484384	0.000420802	0.447248	0.00127345	0.64033	7.24169e-07	-0.343407	0.0157023	-0.362384	0.0105025	0.221029	0.126958	0.209945	0.147655	-0.3157	0.0271258	-0.140037	0.337208	0.199386	0.169594	0.772669	7.83483e-11	-0.461645	0.000841275	0.135119	0.354617	0.0571424	0.696544	0.776255	5.62986e-11
ARAP2	blue	0.554562	3.55458e-05	-0.358598	0.0114012	0.69379	3.25782e-08	-0.667567	1.61315e-07	-0.35959	0.0111596	0.574828	1.56258e-05	0.756241	3.30999e-10	-0.409549	0.00347574	-0.238593	0.0987432	0.315513	0.0272217	0.337511	0.0177093	-0.215377	0.137219	-0.348978	0.0139872	-0.0255846	0.861474	0.894155	5.11673e-18	-0.351785	0.0131855	0.343448	0.0156889	0.373878	0.00813749	0.941764	6.96829e-24
STK4	blue	0.443611	0.00141004	-0.481038	0.000467372	0.667218	1.64606e-07	-0.552444	3.86167e-05	-0.369101	0.0090575	0.669529	1.43904e-07	0.800657	4.99532e-12	-0.441095	0.00151208	-0.288202	0.0446256	0.484739	0.000416122	0.417179	0.00286245	-0.335719	0.0183607	-0.243301	0.0920741	0.0109846	0.940287	0.854227	5.98421e-15	-0.314414	0.0277917	0.403608	0.00403055	0.374653	0.00799604	0.851565	8.87819e-15
ZNF101	blue	0.57738	1.40343e-05	-0.243771	0.0914278	0.802783	3.98185e-12	-0.73737	1.51641e-09	-0.507636	0.000196817	0.632339	1.09457e-06	0.637449	8.41632e-07	-0.390125	0.00558648	-0.337915	0.0175649	0.33204	0.0197621	0.3614	0.0107301	-0.131047	0.369436	0.0271776	0.852942	0.289282	0.0437972	0.831607	1.36441e-13	-0.577634	1.38847e-05	0.135537	0.353117	-0.0262545	0.857884	0.819052	6.38102e-13
KIAA1551	blue	0.667042	1.66295e-07	-0.192159	0.185917	0.730657	2.52687e-09	-0.584718	1.02537e-05	-0.410243	0.0034155	0.648937	4.57902e-07	0.852187	8.10188e-15	-0.597243	5.89358e-06	-0.295031	0.0395938	0.46069	0.000865203	0.440115	0.00155354	-0.263774	0.067051	-0.249425	0.0839282	-0.0367022	0.802304	0.934643	9.68542e-23	-0.319611	0.025182	0.461059	0.000855884	0.387318	0.00596939	0.911978	8.21311e-20
CELF2	blue	0.477085	0.000528362	0.0514494	0.725527	0.490465	0.000346757	-0.596976	5.96504e-06	-0.262336	0.0686088	0.585181	1.00499e-05	0.725644	3.66401e-09	-0.447513	0.00126398	-0.19595	0.17722	0.321689	0.0241975	0.331672	0.0199071	-0.325222	0.0225981	-0.317567	0.0261832	-0.262059	0.0689123	0.859239	2.78656e-15	-0.0998409	0.49489	0.538003	6.69416e-05	0.43457	0.00180793	0.810435	1.72007e-12
HLA-DOA	blue	0.557697	3.14117e-05	0.0730876	0.617727	0.53034	8.87378e-05	-0.573051	1.68301e-05	-0.222843	0.12379	0.479774	0.000486144	0.679521	7.93831e-08	-0.428499	0.00212829	-0.264507	0.0662671	0.441043	0.00151425	0.621123	1.91704e-06	-0.57217	1.74582e-05	-0.402162	0.00417681	-0.274156	0.0566176	0.792151	1.20509e-11	0.146042	0.31669	0.800429	5.11735e-12	0.357052	0.0117868	0.500874	0.000246876
HSD17B11	blue	0.44893	0.00121436	0.00810645	0.955914	0.466389	0.000730909	-0.637624	8.33996e-07	-0.200812	0.166501	0.572985	1.68761e-05	0.756392	3.26791e-10	-0.419094	0.00272437	-0.181248	0.212641	0.401194	0.00427732	0.445301	0.00134504	-0.373713	0.00816776	-0.26466	0.0661039	-0.304386	0.0334666	0.872156	3.3669e-16	-0.0337142	0.818113	0.553077	3.76743e-05	0.454649	0.00103133	0.813433	1.22534e-12
CENPE	blue	0.552932	3.78885e-05	-0.5365	7.07853e-05	0.865214	1.07722e-15	-0.426316	0.00225525	-0.659845	2.50783e-07	0.43316	0.00187825	0.534824	7.53076e-05	-0.31343	0.0283107	-0.465904	0.000741571	0.354678	0.0124007	0.225935	0.118529	-0.286841	0.0456884	0.316837	0.0265485	0.659489	2.5585e-07	0.628716	1.31495e-06	-0.761142	2.17938e-10	-0.100873	0.490419	-0.404542	0.00393847	0.553529	3.7015e-05
MS4A4A	blue	0.620141	2.01136e-06	-0.449323	0.00120089	0.814385	1.09882e-12	-0.616296	2.42373e-06	-0.566426	2.2114e-05	0.503007	0.00022996	0.838223	5.74681e-14	-0.493998	0.000309369	-0.439206	0.00159292	0.402391	0.00415332	0.427055	0.00221154	-0.502064	0.000237304	0.0499198	0.733382	0.296942	0.0382729	0.870298	4.62641e-16	-0.509187	0.000186721	0.278507	0.0526535	-0.070416	0.630669	0.731473	2.37659e-09
KLF12	blue	0.56147	2.70234e-05	-0.170764	0.240743	0.670669	1.34617e-07	-0.59601	6.23038e-06	-0.358375	0.0114562	0.592792	7.19453e-06	0.770923	9.18249e-11	-0.412101	0.00325882	-0.328327	0.0212667	0.369306	0.00901616	0.430545	0.00201511	-0.405314	0.00386376	-0.436713	0.00170553	-0.095503	0.513913	0.891256	9.34297e-18	-0.219064	0.130459	0.470517	0.000645684	0.474045	0.000580034	0.867316	7.62762e-16
LINC01215	blue	0.589188	8.43714e-06	-0.463915	0.000786717	0.854275	5.94123e-15	-0.716261	7.19075e-09	-0.597961	5.7056e-06	0.770039	9.94588e-11	0.808292	2.18414e-12	-0.448601	0.00122572	-0.442295	0.0014626	0.331134	0.0201207	0.341705	0.0162606	-0.331494	0.0199776	0.00477501	0.974024	0.28872	0.0442268	0.8804	7.72487e-17	-0.503281	0.000227866	0.236851	0.101303	-0.00150758	0.991797	0.752865	4.38889e-10
TRAF3	blue	0.500885	0.000246784	0.2213	0.126481	0.424984	0.00233597	-0.551042	4.07805e-05	-0.0813776	0.578306	0.557844	3.12288e-05	0.688372	4.59568e-08	-0.405078	0.0038865	-0.0927412	0.526213	0.451308	0.001135	0.531427	8.52965e-05	-0.329984	0.0205837	-0.502182	0.000236373	-0.454349	0.00104029	0.819509	6.0451e-13	0.115032	0.431251	0.728462	2.97625e-09	0.576815	1.43733e-05	0.731292	2.40924e-09
MICB	blue	0.686853	5.05451e-08	-0.399011	0.00451176	0.886947	2.21726e-17	-0.709689	1.13506e-08	-0.627012	1.43232e-06	0.600394	5.10829e-06	0.746065	7.64511e-10	-0.481823	0.000456052	-0.518182	0.000136902	0.469854	0.000658738	0.511796	0.0001708	-0.361932	0.0106066	0.111679	0.444887	0.410306	0.00341004	0.857173	3.83199e-15	-0.565182	2.32628e-05	0.222533	0.124327	-0.122726	0.40086	0.704882	1.5726e-08
RASSF2	blue	0.614133	2.68884e-06	-0.0441964	0.763006	0.658973	2.63387e-07	-0.666857	1.68081e-07	-0.358519	0.0114207	0.642323	6.52078e-07	0.837024	6.74098e-14	-0.494809	0.000301318	-0.314487	0.0277536	0.472865	0.000601292	0.557443	3.17288e-05	-0.49628	0.000287196	-0.271	0.0596403	-0.155348	0.28649	0.941715	7.10366e-24	-0.0898639	0.539181	0.649821	4.36478e-07	0.339121	0.0171407	0.741339	1.11302e-09
PAG1	blue	0.480995	0.000468005	-0.113562	0.437198	0.526524	0.000101856	-0.691998	3.65353e-08	-0.317764	0.0260852	0.563983	2.44208e-05	0.696251	2.77941e-08	-0.508705	0.000189806	-0.154143	0.290291	0.334707	0.0187374	0.379385	0.00717826	-0.195017	0.179333	-0.150455	0.302127	-0.0689306	0.637913	0.807713	2.32862e-12	-0.352384	0.0130196	0.247304	0.0866828	0.318374	0.0257838	0.919109	1.222e-20
NELL2	blue	0.444509	0.00137517	0.0617711	0.673289	0.465795	0.000743986	-0.649061	4.5483e-07	-0.307156	0.0318107	0.622617	1.78139e-06	0.742009	1.05586e-09	-0.404687	0.00392436	-0.307803	0.0314337	0.304468	0.0334165	0.336642	0.0180227	-0.313672	0.0281824	-0.211714	0.144194	-0.175688	0.227245	0.865116	1.09461e-15	-0.134302	0.357559	0.455294	0.00101232	0.286402	0.0460353	0.753675	4.10333e-10
ATP2B1	blue	0.552318	3.88057e-05	-0.117016	0.423291	0.614822	2.60156e-06	-0.78732	1.95208e-11	-0.396135	0.00483788	0.707181	1.34659e-08	0.717022	6.8145e-09	-0.462148	0.000828909	-0.301859	0.0350389	0.347601	0.0143956	0.39095	0.00547811	-0.11045	0.449946	-0.0565448	0.699567	0.0599739	0.682284	0.856446	4.28145e-15	-0.455157	0.00101634	0.183475	0.206981	0.197137	0.174559	0.940754	1.0323e-23
FAM49B	blue	0.456143	0.000987799	0.0317564	0.828512	0.432577	0.001908	-0.558637	3.02611e-05	-0.183199	0.207676	0.493985	0.000309502	0.683673	6.15734e-08	-0.405192	0.00387552	-0.15684	0.281831	0.400312	0.00437074	0.511338	0.000173505	-0.300425	0.0359577	-0.396721	0.00476973	-0.337937	0.0175572	0.807446	2.39815e-12	0.0044558	0.97576	0.638039	8.1622e-07	0.646694	5.16701e-07	0.785593	2.31232e-11
MPEG1	blue	0.741558	1.09404e-09	-0.252969	0.0794791	0.824186	3.44605e-13	-0.631698	1.1309e-06	-0.435777	0.00174958	0.675247	1.02671e-07	0.881834	5.9151e-17	-0.553769	3.66682e-05	-0.382708	0.00664819	0.517107	0.000142142	0.53634	7.12054e-05	-0.429552	0.00206937	-0.287384	0.0452616	0.0729502	0.61839	0.937444	3.57025e-23	-0.334188	0.0189333	0.486764	0.000390271	0.192796	0.184436	0.770611	9.44513e-11
P2RY14	blue	0.588799	8.58265e-06	-0.282202	0.0494665	0.792702	1.13974e-11	-0.716175	7.23403e-09	-0.487168	0.000385297	0.604957	4.14156e-06	0.752619	4.47932e-10	-0.423958	0.00239986	-0.378926	0.00725424	0.189544	0.192092	0.275601	0.0552753	-0.286124	0.0462567	-0.00379898	0.979332	0.28274	0.0490155	0.847946	1.49959e-14	-0.56192	2.65396e-05	0.175429	0.227942	-0.119678	0.412747	0.731206	2.42489e-09
GSAP	blue	0.288227	0.0446066	-0.46351	0.000796211	0.536148	7.17131e-05	-0.496925	0.000281199	-0.168361	0.247527	0.4535	0.00106599	0.717334	6.66612e-09	-0.488616	0.000367923	-0.103636	0.478552	0.398909	0.00452298	0.363331	0.0102876	-0.184475	0.204472	-0.211869	0.143893	-0.146334	0.315711	0.773727	7.11118e-11	-0.161348	0.268053	0.370343	0.00881006	0.441667	0.00148832	0.851493	8.97223e-15
C6orf211	blue	0.509645	0.000183832	0.203593	0.160585	0.317536	0.0261983	-0.663672	2.01839e-07	-0.13789	0.344744	0.684075	6.00665e-08	0.627615	1.38976e-06	-0.282396	0.0493034	-0.146016	0.316777	0.341889	0.0161996	0.424038	0.00239482	-0.125065	0.391873	-0.220769	0.127417	-0.28072	0.050725	0.73447	1.89412e-09	-0.151335	0.299274	0.314839	0.0275705	0.476874	0.000531808	0.870822	4.23194e-16
TSPAN7	blue	0.722311	4.67014e-09	-0.0757422	0.60498	0.777302	5.10611e-11	-0.567613	2.10677e-05	-0.472252	0.000612596	0.528002	9.65774e-05	0.756658	3.19564e-10	-0.452042	0.00111146	-0.48685	0.000389207	0.384253	0.00641363	0.528586	9.45651e-05	-0.488562	0.000368552	-0.168896	0.246004	0.137398	0.346482	0.846367	1.8768e-14	-0.313191	0.0284378	0.438963	0.0016036	0.0268248	0.85483	0.627596	1.39102e-06
RFTN1	blue	0.708389	1.24045e-08	-0.16282	0.263654	0.770983	9.13306e-11	-0.551754	3.96672e-05	-0.3824	0.00669584	0.623825	1.67832e-06	0.726456	3.45195e-09	-0.464736	0.000767797	-0.364944	0.00992995	0.552019	3.92605e-05	0.655401	3.21437e-07	-0.564833	2.35942e-05	-0.311711	0.0292362	0.0191737	0.895963	0.885062	3.20071e-17	-0.207824	0.151883	0.628496	1.3296e-06	0.204009	0.159715	0.664345	1.94219e-07
RNFT1	blue	0.454321	0.00104113	0.120046	0.411303	0.337662	0.0176553	-0.66033	2.4402e-07	-0.165094	0.256952	0.571042	1.82943e-05	0.639371	7.61484e-07	-0.353977	0.012587	-0.13906	0.340626	0.300733	0.0357587	0.380459	0.00700303	-0.0565691	0.699444	-0.331825	0.0198464	-0.254368	0.0777746	0.710694	1.05936e-08	-0.17613	0.226058	0.318865	0.0255434	0.542651	5.62332e-05	0.863786	1.35741e-15
CCDC109B	blue	0.541923	5.77997e-05	-0.0680837	0.642059	0.621347	1.89608e-06	-0.685149	5.6202e-08	-0.369212	0.00903518	0.665837	1.7827e-07	0.804053	3.47303e-12	-0.433235	0.00187443	-0.325028	0.0226837	0.368591	0.00916076	0.434525	0.00181014	-0.434238	0.00182426	-0.248079	0.0856681	-0.111419	0.445953	0.930177	4.3562e-22	-0.170321	0.241985	0.503381	0.000227104	0.302632	0.0345516	0.804255	3.39776e-12
FCRL2	blue	0.717096	6.77932e-09	-0.523953	0.000111667	0.920566	8.1031e-21	-0.703694	1.70287e-08	-0.656804	2.97339e-07	0.701354	1.98955e-08	0.805089	3.10382e-12	-0.533195	7.99571e-05	-0.501848	0.000239021	0.467188	0.000713681	0.42891	0.00210508	-0.312262	0.0289366	0.0632129	0.666105	0.459041	0.000907978	0.852226	8.0553e-15	-0.663671	2.01852e-07	0.14835	0.309018	-0.131286	0.368558	0.745036	8.30252e-10
FAM26F	blue	0.794926	9.08246e-12	-0.0622269	0.671015	0.855735	4.76976e-15	-0.699216	2.2907e-08	-0.515146	0.000152168	0.73895	1.34163e-09	0.841111	3.89251e-14	-0.494875	0.000300668	-0.454164	0.00104583	0.541962	5.77132e-05	0.597898	5.72178e-06	-0.333338	0.0192578	-0.163798	0.260758	0.199675	0.168965	0.926295	1.48797e-21	-0.45654	0.00097649	0.398856	0.00452885	0.116907	0.423729	0.798029	6.58681e-12
NCKAP1L	blue	0.708101	1.26499e-08	-0.303196	0.0341997	0.841882	3.50318e-14	-0.666282	1.73761e-07	-0.525745	0.00010474	0.710756	1.05484e-08	0.815814	9.31878e-13	-0.496138	0.000288539	-0.435271	0.00177384	0.45972	0.00089015	0.491256	0.000338055	-0.407746	0.00363648	-0.204015	0.159701	0.173472	0.233255	0.933373	1.50097e-22	-0.450862	0.00114951	0.344205	0.0154461	0.146061	0.316626	0.851171	9.40585e-15
HHEX	blue	0.455006	0.00102079	-0.353673	0.0126686	0.704769	1.5845e-08	-0.708152	1.26062e-08	-0.41479	0.00304326	0.527927	9.68398e-05	0.729689	2.7165e-09	-0.392862	0.00523387	-0.408873	0.0035352	0.403127	0.00407873	0.484398	0.000420619	-0.351921	0.0131475	-0.0322309	0.825989	0.153544	0.292194	0.869908	4.94307e-16	-0.39849	0.00456935	0.336262	0.0181613	0.0452637	0.757455	0.74766	6.72292e-10
FAM129C	blue	0.560829	2.77271e-05	-0.210099	0.14735	0.701465	1.9751e-08	-0.648024	4.81049e-07	-0.430736	0.00200481	0.648556	4.67435e-07	0.782507	3.11787e-11	-0.5086	0.00019049	-0.379972	0.00708191	0.469589	0.000664016	0.504691	0.000217358	-0.514698	0.000154548	-0.203359	0.161078	0.0136555	0.925804	0.846038	1.96623e-14	-0.135206	0.354306	0.53957	6.31386e-05	0.187915	0.196011	0.605871	3.96954e-06
LRMP	blue	0.647457	4.95946e-07	0.0915343	0.531633	0.644383	5.84607e-07	-0.680476	7.49031e-08	-0.346434	0.0147495	0.520143	0.000127799	0.748582	6.23858e-10	-0.534469	7.63e-05	-0.273951	0.0568098	0.440305	0.00154543	0.581747	1.16537e-05	-0.346134	0.0148417	-0.340681	0.0166048	-0.182575	0.209256	0.914931	3.80829e-20	-0.104859	0.473347	0.647598	4.92212e-07	0.387662	0.00592129	0.762307	1.97051e-10
INPP4A	blue	0.368893	0.00909959	-0.158044	0.278106	0.469466	0.00066648	-0.372676	0.00836102	-0.0787418	0.590716	0.416588	0.00290623	0.598852	5.47971e-06	-0.400722	0.00432706	-0.137442	0.346328	0.36653	0.00958889	0.456458	0.000978816	-0.275219	0.0556279	-0.529839	9.03674e-05	-0.383337	0.00655174	0.775587	5.99006e-11	0.0948764	0.516691	0.685646	5.44945e-08	0.660715	2.3877e-07	0.734937	1.8279e-09
CNTRL	blue	0.377512	0.00749286	-0.0345651	0.813603	0.445718	0.00132938	-0.467665	0.00070354	-0.0431527	0.768446	0.505968	0.000208223	0.574678	1.5724e-05	-0.367754	0.00933264	-0.0289303	0.843573	0.289484	0.0436432	0.270979	0.0596611	-0.270197	0.0604302	-0.436835	0.00169986	-0.413571	0.00313934	0.760953	2.21534e-10	0.0889953	0.543125	0.567217	2.1412e-05	0.393681	0.00513215	0.687453	4.86857e-08
TOP2A	blue	0.580327	1.23833e-05	-0.444499	0.00137555	0.786475	2.1211e-11	-0.714037	8.40358e-09	-0.50089	0.000246747	0.538067	6.67812e-05	0.753791	4.06397e-10	-0.510112	0.000180932	-0.401407	0.00425505	0.563176	2.523e-05	0.535459	7.35632e-05	-0.407722	0.00363872	0.0969312	0.507609	0.345822	0.0149382	0.835894	7.82539e-14	-0.523869	0.000112001	0.233477	0.106408	-0.105097	0.472338	0.715734	7.4622e-09
GIMAP8	blue	0.770164	9.83428e-11	-0.207742	0.152048	0.874914	2.08148e-16	-0.715453	7.61082e-09	-0.492273	0.000327146	0.728855	2.8906e-09	0.763284	1.80992e-10	-0.529023	9.30794e-05	-0.447839	0.00125239	0.437047	0.00169006	0.520559	0.000125937	-0.344624	0.0153132	-0.0557567	0.703561	0.255979	0.0758472	0.896666	2.99444e-18	-0.515859	0.000148452	0.302627	0.0345543	-0.0558995	0.702837	0.766437	1.37205e-10
ZNF267	blue	0.581788	1.16333e-05	-0.175214	0.228522	0.655329	3.22712e-07	-0.673934	1.11024e-07	-0.351605	0.0132358	0.681494	7.03935e-08	0.668063	1.56735e-07	-0.374297	0.00806074	-0.188508	0.194578	0.280499	0.0509153	0.316916	0.0265086	-0.130847	0.370176	-0.222635	0.12415	0.037584	0.797652	0.841875	3.5064e-14	-0.457962	0.000937013	0.206903	0.153746	0.203706	0.160348	0.927963	8.85062e-22
CD163	blue	0.5869	9.32605e-06	-0.296612	0.0384983	0.717259	6.70147e-09	-0.683252	6.31935e-08	-0.367967	0.00928859	0.605149	4.10478e-06	0.798229	6.4505e-12	-0.526871	0.000100595	-0.316846	0.0265436	0.514414	0.000156077	0.570435	1.87591e-05	-0.261281	0.0697712	-0.0988981	0.498993	0.0925353	0.527136	0.876212	1.6536e-16	-0.323838	0.0232139	0.433116	0.00188049	0.156531	0.282792	0.747024	7.07738e-10
ALDH5A1	blue	0.565732	2.27486e-05	-0.0210259	0.885976	0.54632	4.89133e-05	-0.642077	6.60604e-07	-0.21408	0.139659	0.550436	4.17492e-05	0.661088	2.33781e-07	-0.426886	0.00222147	-0.131659	0.367185	0.308835	0.0308407	0.336113	0.0182159	-0.143067	0.326755	-0.372455	0.00840268	-0.155655	0.285528	0.830143	1.64398e-13	-0.271283	0.0593644	0.346119	0.0148464	0.375789	0.00779263	0.915388	3.37239e-20
ADCY7	blue	0.632142	1.10563e-06	-0.187738	0.19644	0.745027	8.30861e-10	-0.663212	2.07214e-07	-0.391659	0.00538634	0.627868	1.37218e-06	0.848028	1.48211e-14	-0.616812	2.36413e-06	-0.355476	0.0121914	0.468492	0.000686312	0.486373	0.000395146	-0.348462	0.0141391	-0.119712	0.412612	0.0368782	0.801374	0.941039	9.24565e-24	-0.342847	0.0158843	0.425162	0.00232504	0.183341	0.207317	0.827965	2.16185e-13
SYK	blue	0.555888	3.37399e-05	-0.221573	0.126002	0.610718	3.1628e-06	-0.619088	2.11729e-06	-0.192192	0.18584	0.535357	7.38424e-05	0.663793	2.00458e-07	-0.393338	0.0051745	-0.15171	0.298066	0.552636	3.83285e-05	0.686936	5.02847e-08	-0.496626	0.00028397	-0.410358	0.00340562	-0.180551	0.214436	0.839471	4.86115e-14	-0.0201828	0.89052	0.715544	7.56222e-09	0.388227	0.00584306	0.686253	5.24742e-08
GIMAP7	blue	0.660872	2.36656e-07	0.173078	0.234334	0.67388	1.11377e-07	-0.671828	1.25754e-07	-0.342203	0.0160955	0.673685	1.12672e-07	0.796	8.13214e-12	-0.602664	4.60398e-06	-0.312674	0.0287144	0.458854	0.000912949	0.496983	0.000280667	-0.273929	0.0568309	-0.283017	0.048785	-0.138204	0.343633	0.925228	2.06087e-21	-0.201455	0.165119	0.522942	0.000115757	0.344569	0.0153305	0.834068	9.93535e-14
FCRL4	blue	0.638045	8.15963e-07	-0.487677	0.000379106	0.869512	5.28474e-16	-0.556732	3.26342e-05	-0.551763	3.96542e-05	0.374698	0.0079879	0.649669	4.4009e-07	-0.386969	0.00601861	-0.469008	0.00067575	0.419316	0.00270878	0.416384	0.00292152	-0.315142	0.0274134	0.146463	0.315282	0.59696	5.96949e-06	0.663375	2.05291e-07	-0.723962	4.14302e-09	0.00567434	0.969133	-0.315692	0.0271298	0.576318	1.46772e-05
BANK1	blue	0.773048	7.56797e-11	-0.215045	0.137841	0.854608	5.65201e-15	-0.727824	3.12049e-09	-0.4952	0.000297502	0.670257	1.37906e-07	0.856982	3.94577e-15	-0.544032	5.33675e-05	-0.357048	0.0117879	0.409205	0.00350588	0.479219	0.000494596	-0.407651	0.00364515	-0.165994	0.254331	0.138735	0.341765	0.958128	3.58753e-27	-0.427283	0.00219818	0.421392	0.00256654	0.101572	0.487402	0.80266	4.0347e-12
KIAA0101	blue	0.620237	2.00194e-06	-0.295722	0.0391123	0.750608	5.28713e-10	-0.717931	6.39014e-09	-0.517378	0.000140804	0.581737	1.16585e-05	0.74035	1.20277e-09	-0.527753	9.74514e-05	-0.444412	0.0013789	0.420385	0.00263467	0.495513	0.000294489	-0.271706	0.0589534	0.069125	0.636963	0.281072	0.0504239	0.881492	6.3057e-17	-0.563562	2.48399e-05	0.206718	0.154123	0.023987	0.870048	0.843799	2.68953e-14
EPSTI1	blue	0.7722	8.17682e-11	0.105436	0.470901	0.734818	1.84457e-09	-0.73313	2.09717e-09	-0.494891	0.000300515	0.56747	2.11914e-05	0.81823	7.02976e-13	-0.627114	1.42501e-06	-0.321668	0.0242076	0.544676	5.20775e-05	0.619008	2.12554e-06	-0.302064	0.0349089	-0.252188	0.0804431	0.0424003	0.772375	0.899848	1.48837e-18	-0.383205	0.00657197	0.452712	0.00109035	0.294282	0.040122	0.860476	2.29719e-15
LAMP3	blue	0.642719	6.38558e-07	0.228938	0.113583	0.580065	1.25226e-05	-0.662699	2.13355e-07	-0.332701	0.0195036	0.675711	9.98653e-08	0.746272	7.5195e-10	-0.560201	2.84318e-05	-0.266085	0.064605	0.629561	1.26014e-06	0.668863	1.49606e-07	-0.329739	0.0206834	-0.31294	0.028572	-0.168156	0.24811	0.839815	4.64061e-14	-0.141492	0.332165	0.585815	9.77697e-06	0.468596	0.000684164	0.773337	7.37038e-11
BRI3BP	blue	0.580039	1.25366e-05	-0.086253	0.555671	0.606913	3.78151e-06	-0.652969	3.67559e-07	-0.344892	0.0152285	0.594111	6.78367e-06	0.772645	7.85184e-11	-0.547717	4.63656e-05	-0.213042	0.141635	0.533146	8.00986e-05	0.485122	0.000411113	-0.205645	0.156321	-0.238612	0.098716	-0.0488045	0.739126	0.888774	1.54366e-17	-0.284299	0.0477283	0.41712	0.00286675	0.389359	0.00568872	0.896582	3.04906e-18
HPS3	blue	0.576851	1.43514e-05	-0.0668272	0.648228	0.569801	1.92564e-05	-0.513463	0.000161285	-0.323091	0.023552	0.59031	8.0306e-06	0.816537	8.56897e-13	-0.462887	0.000811018	-0.266784	0.0638795	0.42074	0.00261047	0.47027	0.000650508	-0.305438	0.0328296	-0.300714	0.0357711	-0.145277	0.319257	0.832545	1.20989e-13	-0.228326	0.114578	0.457127	0.00096002	0.512994	0.000163913	0.873907	2.48427e-16
PSMB9	blue	0.596188	6.18076e-06	0.46436	0.000776417	0.422765	0.00247612	-0.567901	2.0821e-05	-0.150355	0.302453	0.462542	0.000819334	0.730227	2.60953e-09	-0.54912	4.3928e-05	-0.172135	0.236931	0.566483	2.20632e-05	0.725209	3.78255e-09	-0.469031	0.00067527	-0.441989	0.00147511	-0.380615	0.00697795	0.72933	2.79023e-09	0.255051	0.0769527	0.893464	5.91545e-18	0.496292	0.00028709	0.442462	0.00145587
CCR2	blue	0.770037	9.94735e-11	-0.140032	0.337227	0.853732	6.44337e-15	-0.537033	6.93986e-05	-0.530542	8.80885e-05	0.598279	5.62394e-06	0.820812	5.17748e-13	-0.511183	0.000174424	-0.509897	0.000182259	0.561666	2.68113e-05	0.589798	8.21397e-06	-0.517941	0.000138061	-0.108428	0.458333	0.229268	0.11305	0.885347	3.02907e-17	-0.431826	0.00194697	0.42566	0.00229469	0.0549172	0.707824	0.71285	9.12689e-09
CD84	blue	0.73531	1.77648e-09	-0.272902	0.0578037	0.839899	4.58839e-14	-0.666383	1.72749e-07	-0.525129	0.000107079	0.659205	2.59974e-07	0.867202	7.77308e-16	-0.60428	4.27324e-06	-0.436104	0.00173409	0.548006	4.58528e-05	0.534342	7.66561e-05	-0.368096	0.00926216	-0.218124	0.132158	0.160524	0.270539	0.941449	7.88304e-24	-0.427805	0.00216795	0.421797	0.00253955	0.12824	0.379866	0.799835	5.4488e-12
TRIM59	blue	0.409647	0.00346712	-0.510271	0.000179948	0.860542	2.27341e-15	-0.668614	1.51793e-07	-0.587356	9.14229e-06	0.470646	0.000643165	0.673203	1.15941e-07	-0.41654	0.00290985	-0.448111	0.00124281	0.345088	0.015167	0.325671	0.0224016	-0.2817	0.0498896	0.348247	0.0142027	0.514186	0.000157307	0.724971	3.84893e-09	-0.699895	2.19074e-08	-0.0505805	0.729986	-0.223326	0.122957	0.693957	3.22302e-08
CRLF3	blue	0.58304	1.10242e-05	0.107337	0.462895	0.577488	1.39705e-05	-0.578279	1.35103e-05	-0.203063	0.161701	0.582985	1.10501e-05	0.685818	5.39129e-08	-0.391035	0.00546701	-0.195857	0.17743	0.360674	0.0109006	0.470619	0.000643691	-0.254428	0.0777014	-0.501094	0.000245085	-0.301292	0.0353996	0.841137	3.87888e-14	-0.0516513	0.724493	0.610485	3.19776e-06	0.60578	3.98632e-06	0.807765	2.31519e-12
C16orf54	blue	0.668472	1.53056e-07	-0.48482	0.000415061	0.897191	2.67225e-18	-0.659529	2.55271e-07	-0.567183	2.14417e-05	0.688716	4.49738e-08	0.785252	2.39048e-11	-0.478891	0.000499662	-0.503364	0.000227239	0.490647	0.000344744	0.552011	3.9273e-05	-0.41683	0.00288825	0.00621647	0.966186	0.349243	0.0139099	0.847154	1.67875e-14	-0.497882	0.000272505	0.316572	0.0266819	-0.0386067	0.792267	0.648571	4.67038e-07
LYN	blue	0.645075	5.63448e-07	0.154946	0.287756	0.629927	1.2371e-06	-0.581938	1.15586e-05	-0.232915	0.107277	0.656412	3.03894e-07	0.770994	9.12411e-11	-0.383882	0.0064693	-0.160505	0.270596	0.473484	0.000590052	0.504187	0.000221062	-0.345999	0.0148834	-0.506525	0.000204348	-0.2854	0.0468356	0.894993	4.28508e-18	-0.0678436	0.643235	0.627664	1.38635e-06	0.505241	0.000213382	0.811985	1.44454e-12
CCL20	blue	0.659793	2.51507e-07	-0.470169	0.000652494	0.78799	1.82701e-11	-0.650192	4.27775e-07	-0.530586	8.79494e-05	0.512743	0.000165332	0.624575	1.61713e-06	-0.445345	0.00134338	-0.30588	0.0325651	0.453953	0.0010522	0.611171	3.09578e-06	-0.424775	0.00234882	-0.060834	0.677974	0.3207	0.0246623	0.776383	5.56298e-11	-0.51081	0.000176666	0.33087	0.0202263	-0.105761	0.469529	0.620372	1.98883e-06
GBP1	blue	0.570465	1.87361e-05	0.0190501	0.89663	0.525694	0.000104934	-0.600959	4.97811e-06	-0.322501	0.0238221	0.574435	1.58846e-05	0.777276	5.11844e-11	-0.543174	5.51316e-05	-0.191695	0.187003	0.514742	0.000154311	0.505894	0.000208741	-0.308418	0.0310793	-0.356701	0.011876	-0.223039	0.123451	0.835187	8.5861e-14	-0.152119	0.296749	0.511462	0.00017277	0.5076	0.000197055	0.86782	7.01544e-16
FRZB	blue	0.420298	0.00264065	-0.122856	0.400357	0.481407	0.000462023	-0.580675	1.22009e-05	-0.175419	0.227967	0.528486	9.49073e-05	0.661976	2.22307e-07	-0.305424	0.032838	-0.259915	0.0712978	0.275296	0.0555567	0.375993	0.00775662	-0.412163	0.00325367	-0.225925	0.118546	-0.217021	0.134174	0.844416	2.46812e-14	-0.0915371	0.531621	0.493817	0.000311188	0.29957	0.0365151	0.737521	1.49873e-09
ASPM	blue	0.53827	6.62789e-05	-0.450139	0.00117342	0.764831	1.58087e-10	-0.60778	3.63137e-06	-0.532804	8.11094e-05	0.531978	8.35966e-05	0.682695	6.5395e-08	-0.451263	0.00113646	-0.388655	0.00578423	0.384163	0.00642713	0.35207	0.0131064	-0.330493	0.0203777	-0.0054094	0.970574	0.283432	0.0484404	0.855779	4.73758e-15	-0.502619	0.000232962	0.218236	0.131954	-0.0653067	0.655726	0.756738	3.17386e-10
TRIM14	blue	0.58849	8.69982e-06	0.238954	0.0982189	0.525833	0.000104412	-0.73768	1.48046e-09	-0.227137	0.116529	0.641324	6.87356e-07	0.744555	8.62805e-10	-0.506881	0.000201907	-0.219917	0.128931	0.536417	7.10037e-05	0.617952	2.23733e-06	-0.373765	0.00815829	-0.278297	0.0528397	-0.270528	0.0601035	0.875344	1.92923e-16	-0.0178349	0.903191	0.628538	1.32677e-06	0.378854	0.00726615	0.749641	5.72264e-10
COL1A2	blue	0.64354	6.11409e-07	0.198956	0.170536	0.588271	8.78371e-06	-0.449113	0.00120809	-0.237492	0.100356	0.503568	0.000225693	0.721376	4.99577e-09	-0.422793	0.00247433	-0.372962	0.00830722	0.607538	3.67272e-06	0.688839	4.46276e-08	-0.335242	0.0185373	-0.359017	0.0112987	-0.113884	0.435894	0.794514	9.47494e-12	-0.0919948	0.529562	0.649599	4.4176e-07	0.361205	0.0107757	0.6197	2.0551e-06
SAMD9	blue	0.719615	5.66827e-09	-0.231654	0.109247	0.81765	7.52512e-13	-0.692498	3.53876e-08	-0.477164	0.000527076	0.672487	1.20956e-07	0.81848	6.82626e-13	-0.505651	0.00021046	-0.373115	0.00827873	0.540505	6.09659e-05	0.557377	3.18126e-05	-0.417866	0.0028122	-0.24878	0.0847582	0.102672	0.482675	0.964241	9.40338e-29	-0.4048	0.00391334	0.431527	0.00196271	0.158353	0.277157	0.862333	1.71296e-15
BUB1B	blue	0.515878	0.000148352	-0.312718	0.0286908	0.67267	1.19653e-07	-0.496297	0.000287042	-0.453735	0.00105881	0.585265	1.00132e-05	0.592743	7.21026e-06	-0.378439	0.00733563	-0.388943	0.005745	0.391983	0.00534491	0.350098	0.0136625	-0.302259	0.0347858	0.0428326	0.770117	0.229403	0.112831	0.786591	2.09713e-11	-0.414239	0.00308639	0.250919	0.0820296	-0.0179143	0.902762	0.670134	1.38909e-07
ZC3H12D	blue	0.667142	1.65337e-07	-0.324429	0.0229493	0.851017	9.62005e-15	-0.627157	1.42199e-06	-0.534111	7.73118e-05	0.684001	6.03396e-08	0.811674	1.49623e-12	-0.558475	3.04565e-05	-0.44328	0.0014231	0.506873	0.000201961	0.517233	0.000141516	-0.404303	0.0039618	-0.113015	0.439425	0.204121	0.15948	0.932759	1.84967e-22	-0.432399	0.00191716	0.380797	0.00694867	0.0933793	0.523358	0.785236	2.39425e-11
SEPT6	blue	0.53757	6.80284e-05	-0.255101	0.0768924	0.65464	3.35261e-07	-0.468389	0.000688443	-0.171333	0.239155	0.511616	0.000171861	0.628061	1.35896e-06	-0.378027	0.00740515	-0.200257	0.1677	0.603746	4.38008e-06	0.653502	3.56959e-07	-0.56419	2.42176e-05	-0.540791	6.03148e-05	-0.22279	0.123883	0.809441	1.92241e-12	0.0515946	0.724783	0.713899	8.4848e-09	0.430281	0.00202939	0.648504	4.68743e-07
ZWILCH	blue	0.412996	0.00318564	-0.311332	0.0294433	0.57143	1.80028e-05	-0.422549	0.00249013	-0.320926	0.0245555	0.531313	8.56506e-05	0.698431	2.41156e-08	-0.381779	0.0067928	-0.255729	0.0761434	0.456101	0.000989008	0.352039	0.013115	-0.195526	0.178178	-0.298201	0.0374222	-0.0428329	0.770115	0.832909	1.15434e-13	-0.29379	0.0404723	0.334132	0.0189544	0.406389	0.00376178	0.88405	3.88798e-17
UHRF1	blue	0.62068	1.9591e-06	-0.347772	0.0143443	0.781942	3.29128e-11	-0.698517	2.39805e-08	-0.537713	6.76688e-05	0.631931	1.11757e-06	0.668028	1.57052e-07	-0.445801	0.00132629	-0.382055	0.00674965	0.553125	3.76032e-05	0.484925	0.000413684	-0.417503	0.00283861	-0.0440812	0.763606	0.293907	0.0403888	0.852393	7.85971e-15	-0.486094	0.000398656	0.282491	0.0492233	-0.0642559	0.660927	0.721021	5.12489e-09
ETS1	blue	0.672954	1.17665e-07	-0.171275	0.239318	0.740096	1.22693e-09	-0.678256	8.57024e-08	-0.349092	0.0139538	0.635023	9.54006e-07	0.779198	4.27259e-11	-0.553333	3.72988e-05	-0.297669	0.0377796	0.543089	5.53085e-05	0.64436	5.85345e-07	-0.332978	0.0193965	-0.373	0.00830013	-0.07289	0.61868	0.919568	1.07451e-20	-0.233518	0.106345	0.587913	8.92229e-06	0.410429	0.00339948	0.833269	1.10204e-13
PIK3CD	blue	0.55067	4.13735e-05	0.160457	0.27074	0.526146	0.000103246	-0.473396	0.00059163	-0.117308	0.42213	0.558441	3.04978e-05	0.694082	3.19724e-08	-0.448659	0.00122372	-0.169313	0.244823	0.60482	4.1678e-06	0.623534	1.70265e-06	-0.462739	0.000814564	-0.53209	8.32578e-05	-0.390865	0.00548912	0.803729	3.59636e-12	0.203544	0.160689	0.841331	3.77753e-14	0.517106	0.000142145	0.577351	1.40518e-05
APBB1IP	blue	0.59114	7.74167e-06	0.0846306	0.563156	0.605469	4.04438e-06	-0.54675	4.81161e-05	-0.18701	0.198212	0.657709	2.82695e-07	0.702564	1.83614e-08	-0.475229	0.000559391	-0.207615	0.152304	0.572946	1.69039e-05	0.626381	1.47822e-06	-0.40173	0.00422135	-0.43416	0.00182812	-0.262306	0.0686421	0.86218	1.75528e-15	0.041139	0.778973	0.754144	3.9462e-10	0.442494	0.00145458	0.666282	1.73753e-07
LUM	blue	0.627355	1.40792e-06	-0.0591111	0.686618	0.655279	3.23618e-07	-0.57824	1.3533e-05	-0.208075	0.151379	0.547086	4.75e-05	0.786855	2.0434e-11	-0.572422	1.72762e-05	-0.273822	0.0569311	0.486453	0.000394154	0.591382	7.65902e-06	-0.276844	0.0541409	-0.286515	0.0459459	-0.187477	0.197073	0.880625	7.4102e-17	-0.0927296	0.526265	0.631596	1.13676e-06	0.397112	0.00472486	0.723695	4.22416e-09
LYSMD2	blue	0.728795	2.90366e-09	0.281636	0.0499442	0.658156	2.75724e-07	-0.612269	2.93874e-06	-0.369584	0.00896059	0.613655	2.75102e-06	0.786642	2.0866e-11	-0.565937	2.25594e-05	-0.266907	0.0637524	0.538362	6.60529e-05	0.559734	2.89667e-05	-0.179126	0.218135	-0.298579	0.0371699	-0.100454	0.492232	0.877904	1.21991e-16	-0.233713	0.106045	0.505625	0.000210645	0.415501	0.00298842	0.826026	2.74995e-13
IL33	blue	0.66474	1.89869e-07	-0.18807	0.195636	0.708013	1.27262e-08	-0.700135	2.15637e-08	-0.509165	0.000186862	0.674262	1.08881e-07	0.711657	9.91325e-09	-0.419843	0.002672	-0.411779	0.00328551	0.245513	0.0890632	0.345799	0.0149452	-0.205845	0.15591	-0.036982	0.800827	0.151586	0.298464	0.825543	2.91865e-13	-0.49571	0.000292601	0.169614	0.243974	0.165575	0.255549	0.890874	1.01011e-17
BACH2	blue	0.591494	7.62125e-06	-0.338391	0.0173965	0.767688	1.22779e-10	-0.649679	4.39865e-07	-0.396132	0.00483817	0.629876	1.24026e-06	0.763748	1.73813e-10	-0.472085	0.000615722	-0.396873	0.00475223	0.36814	0.00925299	0.377026	0.00757633	-0.318777	0.0255868	-0.158129	0.277845	0.0766928	0.600443	0.913229	5.95025e-20	-0.376027	0.00775069	0.321218	0.0244179	0.120061	0.411244	0.825524	2.92558e-13
IL10RA	blue	0.576502	1.45642e-05	-0.20182	0.164338	0.72381	4.18895e-09	-0.547899	4.60427e-05	-0.260398	0.0707545	0.654081	3.45749e-07	0.721042	5.11722e-09	-0.485729	0.000403297	-0.302143	0.0348591	0.597602	5.79887e-06	0.648624	4.65703e-07	-0.414626	0.003056	-0.339511	0.0170055	-0.0816872	0.576856	0.832282	1.25138e-13	-0.0474558	0.746091	0.66791	1.58135e-07	0.257413	0.0741638	0.587727	8.99511e-06
KIF11	blue	0.454654	0.00103118	-0.393079	0.00520668	0.789623	1.55343e-11	-0.519904	0.000128874	-0.528214	9.5842e-05	0.478543	0.00050507	0.594034	6.80718e-06	-0.434713	0.00180091	-0.412623	0.00321593	0.310573	0.0298625	0.261319	0.0697289	-0.186951	0.198357	0.353824	0.0126281	0.440171	0.00155113	0.756764	3.16699e-10	-0.623741	1.68535e-06	0.0495494	0.735288	-0.236111	0.102407	0.671807	1.2591e-07
EMB	blue	0.635763	9.18356e-07	0.002601	0.985849	0.677194	9.13637e-08	-0.5909	7.8242e-06	-0.309543	0.030439	0.588195	8.81302e-06	0.804768	3.21414e-12	-0.531238	8.58855e-05	-0.257935	0.0735588	0.518933	0.000133347	0.596828	6.00497e-06	-0.353026	0.0128438	-0.453884	0.0010543	-0.177925	0.221288	0.905253	4.29577e-19	-0.12575	0.389264	0.675827	9.91738e-08	0.508846	0.000188901	0.786592	2.09692e-11
SRGN	blue	0.551974	3.93298e-05	-0.183833	0.206079	0.638257	8.07015e-07	-0.482568	0.000445527	-0.254562	0.07754	0.409171	0.00350891	0.719318	5.7898e-09	-0.569213	1.97288e-05	-0.207754	0.152023	0.468648	0.0006831	0.569158	1.97732e-05	-0.247592	0.0863041	-0.505446	0.000211918	-0.19307	0.1838	0.830251	1.62161e-13	-0.0791738	0.588674	0.679037	8.17489e-08	0.580498	1.22937e-05	0.724377	4.01963e-09
IRAK3	blue	0.521966	0.000119831	-0.385834	0.00618109	0.865759	9.85577e-16	-0.672641	1.19858e-07	-0.590084	8.11091e-06	0.47725	0.000525671	0.560544	2.80447e-05	-0.429558	0.00206903	-0.474608	0.000570127	0.23537	0.10352	0.331544	0.0199575	-0.132478	0.364186	0.400732	0.00432603	0.563187	2.52198e-05	0.66601	1.76508e-07	-0.728944	2.87152e-09	-0.073567	0.615417	-0.30757	0.0315692	0.629817	1.24395e-06
CHAC2	blue	0.57573	1.5045e-05	-0.148185	0.309562	0.749466	5.80515e-10	-0.68798	4.7104e-08	-0.572763	1.70333e-05	0.530572	8.79936e-05	0.715898	7.37648e-09	-0.315568	0.0271936	-0.355136	0.0122801	0.301811	0.035069	0.39824	0.00459726	-0.315755	0.027098	0.18772	0.196484	0.369087	0.0090603	0.798929	5.99407e-12	-0.672472	1.21067e-07	0.0685789	0.639633	-0.124285	0.394859	0.775762	5.89331e-11
CD53	blue	0.631593	1.13694e-06	0.131919	0.366234	0.628913	1.30202e-06	-0.510045	0.000181346	-0.23285	0.107378	0.51749	0.000140253	0.747176	6.99078e-10	-0.511448	0.000172849	-0.23225	0.108313	0.531873	8.39192e-05	0.646487	5.22487e-07	-0.513275	0.000162334	-0.473479	0.000590132	-0.285727	0.0465736	0.864561	1.19766e-15	0.0622628	0.670836	0.822633	4.16062e-13	0.47948	0.000490611	0.636013	9.06585e-07
CTSS	blue	0.665904	1.77582e-07	-0.0348431	0.812131	0.678469	8.46052e-08	-0.664584	1.91575e-07	-0.36755	0.00937486	0.639953	7.38651e-07	0.761156	2.1768e-10	-0.36972	0.0089335	-0.311406	0.0294027	0.445825	0.00132541	0.522838	0.000116181	-0.307542	0.0315856	-0.255705	0.076172	0.00647794	0.964765	0.871445	3.80495e-16	-0.333487	0.0192003	0.3708	0.00872052	0.326867	0.0218845	0.85964	2.61801e-15
FBXO5	blue	0.507718	0.00019627	-0.27712	0.0538925	0.716815	6.91511e-09	-0.710353	1.08452e-08	-0.526109	0.000103383	0.586672	9.41941e-06	0.703957	1.67318e-08	-0.507328	0.000198877	-0.37272	0.00835269	0.262078	0.0688916	0.291997	0.0417691	-0.186463	0.199552	0.332155	0.0197167	0.331603	0.0199343	0.783915	2.72189e-11	-0.651355	4.01527e-07	0.00871176	0.952626	-0.10607	0.468223	0.811778	1.47873e-12
IL15	blue	0.408977	0.00352606	-0.206179	0.155225	0.540488	6.10037e-05	-0.594127	6.77892e-06	-0.282691	0.0490566	0.644407	5.83875e-07	0.710001	1.11103e-08	-0.271941	0.0587256	-0.227873	0.115319	0.327563	0.0215883	0.364145	0.0101057	-0.251626	0.081143	-0.284373	0.047668	-0.175599	0.227484	0.872583	3.12776e-16	-0.205912	0.155771	0.407335	0.00367405	0.435936	0.00174203	0.908902	1.77874e-19
SAMD9L	blue	0.569734	1.93096e-05	-0.0639069	0.662658	0.599994	5.20242e-06	-0.585802	9.78255e-06	-0.282476	0.0492365	0.584782	1.02251e-05	0.747992	6.54432e-10	-0.521251	0.000122902	-0.281042	0.05045	0.581635	1.17099e-05	0.628255	1.34581e-06	-0.492996	0.000319588	-0.205184	0.157271	-0.136288	0.350431	0.887197	2.11054e-17	-0.134104	0.358277	0.594569	6.64629e-06	0.289987	0.0432623	0.761849	2.05027e-10
SP110	blue	0.425375	0.002312	-0.255058	0.0769443	0.584342	1.04219e-05	-0.466124	0.00073673	-0.210193	0.147164	0.478593	0.000504293	0.655443	3.20688e-07	-0.50291	0.00023071	-0.286116	0.0462627	0.422903	0.00246716	0.514954	0.000153186	-0.423587	0.00242333	-0.345268	0.0151106	-0.186039	0.200593	0.802724	4.0073e-12	0.00927896	0.949546	0.649268	4.49753e-07	0.33574	0.018353	0.632484	1.08654e-06
LOC100509445	blue	0.511072	0.000175094	-0.0352256	0.810107	0.560501	2.80927e-05	-0.510743	0.000177073	-0.120776	0.408443	0.539588	6.30965e-05	0.656142	3.0848e-07	-0.355141	0.0122789	-0.141437	0.332352	0.455787	0.000998024	0.446412	0.00130373	-0.357601	0.0116486	-0.550183	4.21604e-05	-0.319937	0.0250256	0.81637	8.73624e-13	0.0511055	0.727291	0.632053	1.11065e-06	0.48066	0.000472916	0.732907	2.13287e-09
PIK3CG	blue	0.705049	1.55503e-08	-0.441069	0.00151317	0.868632	6.12676e-16	-0.641538	6.79635e-07	-0.584109	1.05271e-05	0.711126	1.02828e-08	0.821806	4.59658e-13	-0.531354	8.55246e-05	-0.483082	0.000438402	0.472879	0.000601038	0.43099	0.00199118	-0.279671	0.0516321	0.0975064	0.505082	0.330163	0.0205112	0.89608	3.3972e-18	-0.600853	5.00229e-06	0.190228	0.190462	-0.0443882	0.762007	0.826495	2.59522e-13
PTPN22	blue	0.621091	1.92004e-06	-0.355154	0.0122755	0.770476	9.56146e-11	-0.639974	7.37831e-07	-0.454378	0.00103943	0.683436	6.24824e-08	0.765587	1.47913e-10	-0.456483	0.000978117	-0.36837	0.009206	0.421107	0.00258565	0.424129	0.00238908	-0.358472	0.0114322	-0.0489962	0.738138	0.170234	0.242228	0.917023	2.17177e-20	-0.436642	0.00170885	0.319336	0.0253149	0.045344	0.757038	0.823341	3.81925e-13
HLA-DPA1	blue	0.636703	8.74786e-07	-0.302137	0.0348628	0.723166	4.38963e-09	-0.550983	4.08736e-05	-0.413678	0.00313085	0.56003	2.86271e-05	0.86639	8.88641e-16	-0.587811	8.96231e-06	-0.378708	0.00729059	0.534191	7.70829e-05	0.557425	3.17518e-05	-0.401422	0.00425341	-0.326118	0.022207	-0.0298691	0.838563	0.877131	1.40247e-16	-0.171964	0.237403	0.591541	7.60528e-06	0.37414	0.0080894	0.718895	5.96701e-09
GABBR1	blue	0.741212	1.12421e-09	0.295768	0.0390801	0.687008	5.00591e-08	-0.718643	6.07475e-09	-0.400429	0.00435818	0.652352	3.80219e-07	0.88144	6.36706e-17	-0.584317	1.0433e-05	-0.322441	0.0238497	0.579596	1.27756e-05	0.687114	4.97271e-08	-0.504398	0.000219504	-0.25681	0.0748687	-0.0800982	0.584315	0.926703	1.31164e-21	-0.169243	0.245022	0.654794	3.32417e-07	0.280437	0.0509689	0.71312	8.95738e-09
KMO	blue	0.462657	0.000816551	-0.394431	0.00504058	0.743216	9.59714e-10	-0.609913	3.28525e-06	-0.543241	5.49916e-05	0.559976	2.86887e-05	0.72681	3.36301e-09	-0.499303	0.000260047	-0.386962	0.00601965	0.26154	0.069484	0.294692	0.0398322	-0.417184	0.00286204	0.119033	0.415288	0.230405	0.111226	0.818357	6.92538e-13	-0.489811	0.000354119	0.211383	0.144835	-0.0896735	0.540044	0.680406	7.52258e-08
CXCL13	blue	0.823401	3.7915e-13	-0.370427	0.00879359	0.893851	5.4542e-18	-0.67236	1.21866e-07	-0.527342	9.89045e-05	0.60785	3.61956e-06	0.831169	1.443e-13	-0.608379	3.53091e-06	-0.422685	0.00248127	0.546523	4.85349e-05	0.678285	8.55484e-08	-0.488312	0.000371504	-0.205067	0.157514	0.186145	0.200333	0.910038	1.34153e-19	-0.366574	0.00957956	0.534548	7.60774e-05	0.110264	0.450715	0.686999	5.0088e-08
CASP1	blue	0.441136	0.00151033	0.0535295	0.714891	0.416926	0.00288108	-0.499121	0.000261614	-0.108723	0.457106	0.491956	0.000330512	0.649031	4.55575e-07	-0.459371	0.000899286	-0.0779761	0.594342	0.453426	0.00106827	0.483691	0.000430087	-0.251922	0.0807728	-0.424628	0.00235797	-0.420068	0.00265644	0.811456	1.53348e-12	0.0924315	0.527601	0.658669	2.67909e-07	0.557283	3.19316e-05	0.763783	1.73285e-10
LY86	blue	0.563505	2.48977e-05	0.169251	0.244998	0.536411	7.10191e-05	-0.638645	7.90889e-07	-0.1883	0.195078	0.603648	4.39981e-06	0.677568	8.9334e-08	-0.410743	0.00337265	-0.189715	0.191682	0.410307	0.00341	0.473542	0.000589014	-0.425073	0.0023305	-0.390859	0.00548993	-0.315927	0.0270099	0.838755	5.35206e-14	0.0515519	0.725002	0.637343	8.46264e-07	0.343771	0.015585	0.675476	1.01279e-07
RP11-389C8.2	blue	0.678734	8.32623e-08	-0.186792	0.198746	0.851786	8.59516e-15	-0.659676	2.53172e-07	-0.552647	3.83115e-05	0.575403	1.52531e-05	0.720972	5.14297e-09	-0.532896	8.08367e-05	-0.499163	0.000261251	0.396856	0.00475421	0.451381	0.00113263	-0.217907	0.132552	0.165258	0.256472	0.413674	0.00313112	0.81885	6.53499e-13	-0.684415	5.88177e-08	0.118759	0.41637	-0.111935	0.443836	0.752993	4.34286e-10
HCP5	blue	0.615936	2.46604e-06	0.389649	0.00564986	0.467577	0.000705416	-0.649239	4.50461e-07	-0.0810248	0.57996	0.531358	8.55102e-05	0.692894	3.45022e-08	-0.506579	0.000203975	-0.0819003	0.575859	0.516014	0.000147655	0.637268	8.49554e-07	-0.400007	0.00440345	-0.405961	0.00380212	-0.40719	0.00368741	0.728801	2.90234e-09	0.219655	0.129398	0.781698	3.36918e-11	0.376956	0.0075884	0.474881	0.00056539
CCR1	blue	0.698875	2.34244e-08	-0.253407	0.0789423	0.745374	8.08116e-10	-0.536402	7.10423e-05	-0.381114	0.00689797	0.549845	4.27149e-05	0.756395	3.26718e-10	-0.56463	2.37901e-05	-0.258882	0.0724704	0.498176	0.000269889	0.493152	0.000317976	-0.380884	0.00693475	-0.270707	0.059928	0.0127073	0.930943	0.901432	1.04183e-18	-0.26672	0.0639452	0.508957	0.000188193	0.190291	0.190314	0.777663	4.93642e-11
PLA1A	blue	0.648166	4.77375e-07	-0.372037	0.00848205	0.746903	7.14681e-10	-0.661327	2.30641e-07	-0.490712	0.000344015	0.58084	1.21151e-05	0.840827	4.04603e-14	-0.628389	1.33675e-06	-0.33524	0.0185382	0.462475	0.000820942	0.499987	0.000254238	-0.463769	0.000790144	-0.143984	0.323632	0.0759999	0.603749	0.889477	1.34049e-17	-0.306401	0.0322554	0.441931	0.00147746	0.13297	0.362392	0.765372	1.50742e-10
LOC101928789	blue	0.58892	8.53701e-06	-0.0691706	0.636741	0.641574	6.78349e-07	-0.676824	9.34224e-08	-0.318445	0.0257493	0.622769	1.7681e-06	0.788849	1.67789e-11	-0.552666	3.82831e-05	-0.296907	0.0382968	0.45437	0.00103967	0.540366	6.12832e-05	-0.407912	0.00362146	-0.220955	0.127088	-0.138905	0.34117	0.926385	1.4472e-21	-0.1312	0.368873	0.609871	3.29184e-06	0.25968	0.0715639	0.739876	1.24817e-09
CCL5	blue	0.517787	0.000138804	0.358498	0.0114258	0.3967	0.00477216	-0.500785	0.000247603	-0.102169	0.484832	0.387634	0.00592516	0.739539	1.28151e-09	-0.42636	0.00225262	-0.129185	0.376335	0.536058	7.19539e-05	0.573609	1.64431e-05	-0.447385	0.00126853	-0.554618	3.54687e-05	-0.39147	0.0054107	0.745673	7.88968e-10	0.169819	0.243396	0.800659	4.99408e-12	0.562159	2.62851e-05	0.547375	4.6978e-05
ELL3	blue	0.544631	5.21664e-05	-0.0524862	0.720219	0.558054	3.09696e-05	-0.600144	5.16697e-06	-0.315815	0.027067	0.673286	1.15369e-07	0.665076	1.86247e-07	-0.406763	0.00372688	-0.243676	0.0915582	0.53335	7.95013e-05	0.463333	0.000800404	-0.295943	0.0389591	-0.239811	0.0969827	-0.143808	0.324228	0.870935	4.15112e-16	-0.149244	0.306079	0.478039	0.000513015	0.320265	0.024869	0.827711	2.2315e-13
TLR7	blue	0.693549	3.30857e-08	-0.464123	0.000781895	0.852672	7.54192e-15	-0.728507	2.96629e-09	-0.541391	5.89688e-05	0.675444	1.01473e-07	0.813281	1.24668e-12	-0.500331	0.00025136	-0.438559	0.00162149	0.330776	0.0202638	0.401782	0.00421597	-0.325543	0.0224573	0.0997365	0.495343	0.320951	0.0245434	0.891833	8.2984e-18	-0.570423	1.87685e-05	0.19815	0.17231	-0.101762	0.486584	0.79623	7.9408e-12
TRAT1	blue	0.5512	4.05315e-05	-0.302454	0.0346629	0.732375	2.22047e-09	-0.725826	3.61532e-09	-0.460547	0.000868838	0.725298	3.75794e-09	0.821078	5.01572e-13	-0.420914	0.00259868	-0.368101	0.00926102	0.291313	0.0422721	0.311157	0.0295396	-0.408531	0.00356571	-0.0534876	0.715105	0.0883902	0.545882	0.925458	1.92183e-21	-0.383394	0.00654319	0.325083	0.0226593	0.0681942	0.641517	0.791334	1.30875e-11
FLI1	blue	0.72112	5.08867e-09	-0.250492	0.0825678	0.855667	4.81858e-15	-0.685281	5.57444e-08	-0.526054	0.000103587	0.701544	1.96476e-08	0.851989	8.34244e-15	-0.585767	9.79735e-06	-0.457608	0.000946709	0.446703	0.00129312	0.491643	0.000333859	-0.373546	0.00819856	-0.0387099	0.791723	0.16596	0.254431	0.949651	2.48808e-25	-0.443709	0.0014062	0.374775	0.00797406	0.126995	0.384551	0.829712	1.73589e-13
PLCG2	blue	0.544352	5.2724e-05	0.296571	0.038526	0.449137	0.00120727	-0.437116	0.00168685	-0.078676	0.591026	0.51835	0.000136099	0.653905	3.49125e-07	-0.374261	0.00806728	-0.118353	0.417975	0.561181	2.73384e-05	0.6342	9.95207e-07	-0.439328	0.00158757	-0.56593	2.25656e-05	-0.481292	0.000463684	0.793179	1.08581e-11	0.233694	0.106075	0.837828	6.05788e-14	0.603262	4.47886e-06	0.641926	6.65893e-07
MCOLN2	blue	0.668606	1.51867e-07	-0.272207	0.058469	0.771852	8.44019e-11	-0.687691	4.79633e-08	-0.417268	0.00285588	0.695388	2.9392e-08	0.851982	8.35079e-15	-0.530137	8.93965e-05	-0.338456	0.0173737	0.59958	5.30133e-06	0.581035	1.20148e-05	-0.369696	0.00893816	-0.252563	0.0799784	0.0491106	0.737548	0.964126	1.01286e-28	-0.347849	0.0143211	0.495998	0.000289855	0.244448	0.0905031	0.86202	1.80036e-15
MEF2C	blue	0.567985	2.07494e-05	0.0482264	0.742109	0.544859	5.17173e-05	-0.603709	4.38745e-06	-0.193895	0.181897	0.558148	3.08547e-05	0.740014	1.23487e-09	-0.408133	0.00360142	-0.224506	0.120939	0.403284	0.0040629	0.532217	8.28702e-05	-0.428194	0.00214564	-0.341408	0.0163598	-0.290555	0.0428363	0.889475	1.34113e-17	-0.0449277	0.759201	0.634015	1.00472e-06	0.463838	0.000788535	0.80698	2.52426e-12
KLHDC7B	blue	0.701488	1.97206e-08	-0.0482782	0.741842	0.725274	3.76474e-09	-0.578539	1.33624e-05	-0.384443	0.00638526	0.663544	2.03326e-07	0.677164	9.15315e-08	-0.40801	0.00361255	-0.31821	0.0258644	0.324681	0.0228371	0.536394	7.10637e-05	-0.519341	0.000131452	-0.227276	0.1163	0.00889885	0.95161	0.83452	9.36813e-14	-0.201205	0.165655	0.531612	8.47215e-05	0.0419347	0.774809	0.598459	5.57813e-06
GAPT	blue	0.644038	5.9544e-07	-0.474223	0.000576887	0.893775	5.54236e-18	-0.639235	7.66875e-07	-0.676992	9.24819e-08	0.641806	6.70112e-07	0.746938	7.12651e-10	-0.452212	0.00110607	-0.506194	0.000206648	0.364353	0.0100597	0.332448	0.0196021	-0.279232	0.0520156	0.290525	0.0428582	0.474551	0.000571134	0.772884	7.68256e-11	-0.635409	9.35255e-07	0.0646141	0.659152	-0.212238	0.14318	0.655352	3.22311e-07
GPR137B	blue	0.427008	0.00221428	-0.0651644	0.656429	0.463545	0.000795398	-0.634479	9.81078e-07	-0.268441	0.0621853	0.588759	8.59754e-06	0.765529	1.48673e-10	-0.354759	0.0123792	-0.226431	0.117701	0.343797	0.0155768	0.375144	0.00790753	-0.299801	0.0363638	-0.105178	0.471995	-0.174672	0.229986	0.849637	1.1759e-14	-0.164062	0.25998	0.389768	0.0056339	0.33117	0.0201061	0.833506	1.06866e-13
KLRB1	blue	0.566492	2.20547e-05	-0.32699	0.0218317	0.775592	5.98702e-11	-0.684491	5.85389e-08	-0.583542	1.07882e-05	0.682003	6.82308e-08	0.74366	9.26521e-10	-0.406393	0.00376142	-0.495516	0.000294458	0.248429	0.0852126	0.264696	0.0660663	-0.224703	0.120605	0.165815	0.254852	0.298196	0.0374255	0.809469	1.91645e-12	-0.538837	6.48934e-05	0.104847	0.473396	-0.0735989	0.615263	0.710613	1.06525e-08
GIMAP4	blue	0.729797	2.69478e-09	-0.0771286	0.598368	0.815705	9.43685e-13	-0.659497	2.55742e-07	-0.420138	0.00265165	0.662786	2.12303e-07	0.846301	1.89436e-14	-0.562376	2.60575e-05	-0.391254	0.00543856	0.513297	0.00016221	0.579859	1.2633e-05	-0.395252	0.00494202	-0.324589	0.0228779	0.0105471	0.942661	0.935834	6.37002e-23	-0.301185	0.035468	0.546118	4.92934e-05	0.301489	0.0352737	0.780855	3.6514e-11
RCSD1	blue	0.700975	2.04016e-08	-0.233746	0.105994	0.805735	2.89321e-12	-0.649914	4.34279e-07	-0.455706	0.00100036	0.664226	1.95546e-07	0.838475	5.55653e-14	-0.59473	6.59867e-06	-0.401109	0.0042862	0.448943	0.00121391	0.513151	0.000163028	-0.428085	0.00215188	-0.129177	0.376367	0.07165	0.624678	0.948371	4.42408e-25	-0.333518	0.0191885	0.492036	0.000329658	0.146187	0.316204	0.771286	8.88586e-11
STAMBPL1	blue	0.634779	9.66077e-07	-0.225587	0.119113	0.727689	3.15163e-09	-0.689655	4.23893e-08	-0.331634	0.0199222	0.7285	2.96785e-09	0.801108	4.76162e-12	-0.513493	0.000161119	-0.298155	0.0374528	0.469436	0.000667084	0.497266	0.000278075	-0.356116	0.0120257	-0.107845	0.46077	-0.0237489	0.871327	0.950759	1.49292e-25	-0.304013	0.0336947	0.457327	0.000954473	0.216143	0.135794	0.860661	2.23144e-15
CTA-250D10.23	blue	0.747709	6.69595e-10	-0.285668	0.0466204	0.85033	1.0634e-14	-0.678509	8.4402e-08	-0.473208	0.00059504	0.613062	2.82988e-06	0.811759	1.48198e-12	-0.595261	6.44349e-06	-0.361532	0.0106993	0.53996	6.22238e-05	0.627317	1.41066e-06	-0.507496	0.000197755	-0.237068	0.100983	0.114729	0.432473	0.937594	3.3795e-23	-0.322488	0.0238279	0.545822	4.98529e-05	0.104044	0.47681	0.70821	1.25564e-08
GPR183	blue	0.607546	3.67126e-06	-0.369273	0.00902292	0.787036	2.00744e-11	-0.727774	3.13198e-09	-0.413784	0.00312241	0.60948	3.35294e-06	0.772706	7.80823e-11	-0.550927	4.09628e-05	-0.282551	0.0491733	0.359393	0.0112071	0.428747	0.00211429	-0.289426	0.0436873	-0.228316	0.114594	0.0225308	0.877875	0.945776	1.36142e-24	-0.321884	0.0241072	0.4361	0.00173426	0.212149	0.143351	0.834768	9.07001e-14
ARHGAP9	blue	0.497108	0.000279515	0.024603	0.86674	0.494955	0.00029989	-0.575848	1.49705e-05	-0.169096	0.245437	0.520234	0.000127388	0.686269	5.24195e-08	-0.45498	0.00102154	-0.225131	0.11988	0.537716	6.76605e-05	0.694194	3.17422e-08	-0.559827	2.886e-05	-0.325095	0.0226539	-0.301546	0.0352375	0.775509	6.03334e-11	0.15693	0.281552	0.789359	1.59488e-11	0.359693	0.0111347	0.493787	0.000311492
CHIC1	blue	0.476425	0.000539207	-0.194236	0.181116	0.548323	4.52972e-05	-0.534919	7.50433e-05	-0.280475	0.0509362	0.58503	1.01157e-05	0.649904	4.34516e-07	-0.247602	0.0862918	-0.138293	0.343321	0.368778	0.00912287	0.338925	0.0172092	-0.160798	0.26971	-0.349339	0.0138817	-0.0185928	0.899098	0.750324	5.41164e-10	-0.37944	0.00716919	0.240983	0.0953127	0.392101	0.00532992	0.88946	1.34515e-17
EOMES	blue	0.737738	1.47384e-09	-0.452652	0.00109224	0.847829	1.52478e-14	-0.674302	1.08622e-07	-0.49468	0.000302587	0.60896	3.43588e-06	0.794532	9.45719e-12	-0.519152	0.000132326	-0.394647	0.0050145	0.404229	0.00396913	0.511872	0.000170354	-0.378064	0.00739883	-0.0702497	0.631479	0.218586	0.13132	0.895887	3.54115e-18	-0.455317	0.00101166	0.350137	0.0136512	-0.0121712	0.93385	0.729004	2.85881e-09
CXCL9	blue	0.777342	5.08714e-11	0.707374	1.32912e-08	0.536329	7.12347e-05	-0.690459	4.02872e-08	-0.347925	0.0142986	0.606059	3.93491e-06	0.857939	3.40726e-15	-0.557242	3.1983e-05	-0.28023	0.0511473	0.642456	6.47514e-07	0.741939	1.06166e-09	-0.438508	0.00162375	-0.253632	0.0786668	-0.150433	0.302198	0.813345	1.2377e-12	-0.119524	0.413354	0.633804	1.01565e-06	0.343655	0.0156224	0.65747	2.86504e-07
FANCD2	blue	0.34286	0.0158799	-0.31058	0.0298588	0.523516	0.000113419	-0.551104	4.0682e-05	-0.357779	0.0116041	0.63798	8.18707e-07	0.675398	1.0175e-07	-0.270961	0.0596785	-0.262431	0.0685055	0.36704	0.00948132	0.264648	0.0661166	-0.281294	0.0502342	-0.0647688	0.658386	0.00142908	0.992224	0.842938	3.02996e-14	-0.264323	0.0664628	0.315876	0.0270356	0.179062	0.218303	0.782125	3.2342e-11
BIRC3	blue	0.46135	0.000848609	-0.376371	0.00769033	0.774922	6.36984e-11	-0.600615	5.05695e-06	-0.463619	0.000793662	0.53068	8.76487e-05	0.672729	1.19241e-07	-0.622241	1.81468e-06	-0.233698	0.106067	0.38269	0.00665102	0.385942	0.00616548	-0.192354	0.185463	0.00618765	0.966343	0.124137	0.395424	0.819995	5.70657e-13	-0.389896	0.00561694	0.297867	0.037646	0.0549094	0.707864	0.745293	8.13396e-10
BLNK	blue	0.555492	3.42708e-05	-0.154702	0.288523	0.599855	5.23543e-06	-0.526189	0.000103087	-0.257907	0.0735915	0.51219	0.000168507	0.757348	3.01448e-10	-0.587065	9.2592e-06	-0.234935	0.104179	0.509224	0.000186488	0.561378	2.71234e-05	-0.287389	0.0452582	-0.410719	0.0033747	-0.233838	0.105852	0.891426	9.02195e-18	-0.0681463	0.641751	0.638109	8.13248e-07	0.55494	3.50224e-05	0.845105	2.24148e-14
HLA-DQA1	blue	0.699292	2.27923e-08	-0.182679	0.20899	0.731707	2.33517e-09	-0.634726	9.68726e-07	-0.407175	0.00368877	0.564366	2.40451e-05	0.781042	3.58689e-11	-0.578631	1.33105e-05	-0.264801	0.0659553	0.590177	8.0777e-06	0.640566	7.15274e-07	-0.524603	0.000109107	-0.373285	0.00824698	-0.0190456	0.896654	0.894526	4.73129e-18	-0.218583	0.131325	0.606688	3.82144e-06	0.313458	0.0282956	0.757929	2.86931e-10
WIPF1	blue	0.64022	7.28361e-07	-0.0447747	0.759997	0.712779	9.17224e-09	-0.67606	9.77975e-08	-0.404422	0.00395019	0.676346	9.61373e-08	0.822938	4.01002e-13	-0.462564	0.000818783	-0.34901	0.0139778	0.407594	0.00365039	0.475103	0.000561548	-0.423916	0.00240248	-0.0336288	0.818566	0.0101689	0.944714	0.926614	1.34831e-21	-0.297858	0.0376521	0.42851	0.00212764	0.160061	0.271942	0.788739	1.69639e-11
DBF4	blue	0.538652	6.53414e-05	-0.173357	0.233568	0.604506	4.22892e-06	-0.501998	0.00023783	-0.460393	0.000872769	0.569939	1.91472e-05	0.701372	1.98725e-08	-0.404517	0.00394092	-0.386223	0.00612493	0.271207	0.0594388	0.261477	0.0695539	-0.245761	0.0887301	-0.131418	0.368073	0.0782655	0.592971	0.807564	2.36725e-12	-0.44738	0.00126872	0.225391	0.119442	0.29067	0.0427504	0.885164	3.13813e-17
RAC2	blue	0.702314	1.86689e-08	0.149213	0.306182	0.69351	3.31688e-08	-0.554799	3.52168e-05	-0.287127	0.0454636	0.531877	8.39074e-05	0.74617	7.58092e-10	-0.501306	0.000243364	-0.280986	0.0504975	0.579341	1.29147e-05	0.732134	2.26132e-09	-0.508762	0.00018944	-0.442989	0.0014347	-0.128209	0.379982	0.82824	2.08887e-13	-0.0267268	0.855355	0.791354	1.30607e-11	0.359322	0.0112245	0.543268	5.49353e-05
RNASE6	blue	0.626696	1.45515e-06	0.0278582	0.849301	0.65366	3.53867e-07	-0.612519	2.90393e-06	-0.304555	0.0333634	0.658287	2.73702e-07	0.821641	4.68869e-13	-0.432974	0.00188766	-0.299588	0.0365028	0.481057	0.000467099	0.540797	6.02996e-05	-0.41978	0.0026764	-0.371382	0.00860745	-0.192298	0.185592	0.927558	1.00535e-21	-0.101975	0.485668	0.628587	1.32352e-06	0.392814	0.00523983	0.765535	1.48587e-10
AKAP7	blue	0.526527	0.000101844	-0.160378	0.270979	0.565349	2.31059e-05	-0.598173	5.65094e-06	-0.489378	0.000359063	0.5222	0.00011884	0.737659	1.4829e-09	-0.403978	0.00399381	-0.243462	0.0918524	0.235999	0.102574	0.251223	0.0816472	-0.163385	0.261978	-0.280848	0.0506158	0.0329137	0.822361	0.789058	1.64338e-11	-0.418868	0.00274036	0.194746	0.179951	0.393887	0.00510686	0.91582	3.00451e-20
CD69	blue	0.707	1.36323e-08	-0.484057	0.000425162	0.935181	8.02419e-23	-0.689843	4.18894e-08	-0.629159	1.28596e-06	0.67423	1.09088e-07	0.791924	1.23304e-11	-0.533495	7.90818e-05	-0.469128	0.000673301	0.477681	0.00051872	0.496157	0.000288357	-0.324764	0.0228004	0.0357943	0.807099	0.402215	0.00417133	0.864344	1.24053e-15	-0.608996	3.43015e-06	0.222462	0.12445	-0.0543347	0.710788	0.740607	1.17881e-09
HAUS1	blue	0.377781	0.00744695	-0.0664648	0.650012	0.402452	0.00414711	-0.574728	1.56909e-05	-0.187233	0.197668	0.541077	5.96682e-05	0.668398	1.53713e-07	-0.433851	0.00184346	-0.121414	0.405951	0.30063	0.0358249	0.355153	0.0122755	-0.129729	0.374314	-0.252735	0.0797663	-0.32443	0.0229489	0.805032	3.12319e-12	-0.0712989	0.62638	0.454667	0.00103079	0.551868	3.94919e-05	0.861863	1.84564e-15
BZRAP1-AS1	blue	0.596095	6.20664e-06	0.0381186	0.794836	0.671707	1.26649e-07	-0.697213	2.61098e-08	-0.300847	0.0356853	0.726835	3.35689e-09	0.737196	1.5369e-09	-0.337013	0.0178883	-0.261882	0.0691066	0.433587	0.00185666	0.500014	0.000254008	-0.351163	0.0133598	-0.330129	0.0205249	-0.125769	0.389193	0.90307	7.15945e-19	-0.165769	0.254984	0.520374	0.000126764	0.283403	0.048465	0.755015	3.66909e-10
S1PR3	blue	0.444945	0.00135849	0.33791	0.0175667	0.309625	0.0303927	-0.563774	2.46287e-05	-0.113896	0.435842	0.625166	1.57038e-06	0.691337	3.81052e-08	-0.397607	0.00466852	-0.0825954	0.572613	0.357848	0.011587	0.379134	0.00721973	-0.226091	0.118267	-0.299137	0.0367998	-0.496229	0.000287678	0.771312	8.86481e-11	0.177544	0.222295	0.638984	7.77005e-07	0.535878	7.24334e-05	0.691609	3.74511e-08
CSF2RB	blue	0.80624	2.73769e-12	-0.123981	0.396025	0.899998	1.43945e-18	-0.568636	2.02022e-05	-0.429186	0.00208968	0.660007	2.48501e-07	0.785197	2.40334e-11	-0.468199	0.000692366	-0.445404	0.00134114	0.509007	0.00018787	0.629869	1.24074e-06	-0.326154	0.0221913	-0.199438	0.169482	0.15072	0.301267	0.908664	1.88612e-19	-0.388511	0.00580396	0.488347	0.000371094	0.134357	0.357362	0.716954	6.84733e-09
POSTN	blue	0.753346	4.21736e-10	0.0309992	0.832541	0.741131	1.13141e-09	-0.55728	3.19344e-05	-0.376689	0.00763477	0.575655	1.50924e-05	0.791403	1.29959e-11	-0.484395	0.000420656	-0.371109	0.00866036	0.415869	0.00296036	0.480757	0.000471495	-0.301648	0.0351728	-0.140822	0.334481	0.0747966	0.609508	0.865807	9.77802e-16	-0.358597	0.0114014	0.373341	0.00823662	0.139806	0.338014	0.77587	5.8348e-11
NLRC3	blue	0.663667	2.01905e-07	0.0278062	0.84958	0.707037	1.35981e-08	-0.645977	5.36936e-07	-0.360021	0.0110561	0.648344	4.72812e-07	0.83207	1.28594e-13	-0.602299	4.68167e-06	-0.268024	0.0626082	0.543692	5.40597e-05	0.546593	4.84066e-05	-0.37965	0.00713467	-0.339232	0.0171023	-0.135334	0.353844	0.943529	3.44777e-24	-0.163301	0.262227	0.611725	3.01561e-06	0.36616	0.00966759	0.799856	5.43682e-12
PTTG1	blue	0.470245	0.000650999	0.146484	0.31521	0.408626	0.00355726	-0.537684	6.77409e-05	-0.135305	0.353949	0.594068	6.79696e-06	0.738152	1.42738e-09	-0.440055	0.00155614	-0.217932	0.132508	0.500137	0.000252982	0.511142	0.000174672	-0.415782	0.00296699	-0.25359	0.0787192	-0.341656	0.0162771	0.808308	2.18028e-12	0.133011	0.362243	0.69268	3.49775e-08	0.44252	0.00145352	0.623096	1.73986e-06
DDX60	blue	0.868099	6.69664e-16	0.0474713	0.746011	0.835052	8.74006e-14	-0.691642	3.73732e-08	-0.498039	0.000271106	0.622228	1.81583e-06	0.748177	6.44687e-10	-0.499404	0.000259182	-0.367236	0.00944037	0.510387	0.00017924	0.631064	1.16788e-06	-0.303312	0.0341274	-0.209485	0.148563	0.155962	0.284567	0.862479	1.67363e-15	-0.477159	0.000527157	0.358471	0.0114324	0.187219	0.197701	0.820475	5.38981e-13
PRDM1	blue	0.649681	4.3981e-07	-0.376635	0.00764416	0.860168	2.41085e-15	-0.609627	3.32989e-06	-0.525497	0.000105677	0.556517	3.29125e-05	0.689297	4.33572e-08	-0.457764	0.00094241	-0.489791	0.000354347	0.454922	0.00102327	0.501166	0.000244494	-0.305591	0.0327376	0.0819547	0.575605	0.327976	0.0214138	0.823434	3.77647e-13	-0.543958	5.35177e-05	0.209206	0.149117	-0.0909226	0.534391	0.72831	3.01012e-09
NPL	blue	0.508399	0.00019179	-0.478495	0.000505826	0.711538	9.99508e-09	-0.600301	5.12999e-06	-0.429463	0.00207426	0.604347	4.26011e-06	0.797447	6.99883e-12	-0.524055	0.000111263	-0.382396	0.00669654	0.566743	2.18301e-05	0.573358	1.66159e-05	-0.338407	0.017391	-0.150275	0.302713	0.102163	0.48486	0.871676	3.65701e-16	-0.318523	0.025711	0.401962	0.00419743	0.25851	0.0728961	0.798692	6.14485e-12
CHN1	blue	0.665698	1.79699e-07	-0.314877	0.0275505	0.770367	9.65638e-11	-0.549297	4.36283e-05	-0.434178	0.00182724	0.667017	1.66535e-07	0.778743	4.46021e-11	-0.440903	0.0015201	-0.338936	0.0172053	0.452613	0.00109345	0.454612	0.00103243	-0.326517	0.0220344	-0.169518	0.244244	0.0473615	0.746579	0.933105	1.64483e-22	-0.336692	0.0180044	0.429202	0.00208878	0.209906	0.147731	0.837389	6.4221e-14
MIR155	blue	0.699257	2.28453e-08	-0.457146	0.000959486	0.866972	8.07437e-16	-0.686391	5.20226e-08	-0.582071	1.14931e-05	0.651455	3.9934e-07	0.807339	2.42663e-12	-0.544538	5.23516e-05	-0.344365	0.0153952	0.347608	0.0143935	0.346269	0.0148002	-0.320955	0.0245418	-0.0578999	0.692719	0.233932	0.105709	0.917345	1.98925e-20	-0.521716	0.000120894	0.275243	0.055605	0.00563367	0.969354	0.792484	1.16522e-11
SELL	blue	0.804467	3.32088e-12	-0.484743	0.00041606	0.931767	2.58059e-22	-0.63957	7.53573e-07	-0.611017	3.11844e-06	0.677536	8.95068e-08	0.834726	9.1195e-14	-0.625627	1.53475e-06	-0.428046	0.00215408	0.550428	4.17629e-05	0.586697	9.40914e-06	-0.434869	0.00179333	-0.111955	0.443755	0.298063	0.0375146	0.890031	1.19885e-17	-0.476893	0.000531496	0.411629	0.003298	0.00432596	0.976466	0.685884	5.36916e-08
P2RY13	blue	0.587171	9.21667e-06	-0.380893	0.00693322	0.797904	6.67333e-12	-0.644954	5.67122e-07	-0.58685	9.3463e-06	0.539537	6.3218e-05	0.836094	7.62206e-14	-0.531444	8.52434e-05	-0.433655	0.00185328	0.423024	0.00245938	0.38909	0.00572511	-0.333834	0.0190679	0.0230188	0.875251	0.305238	0.0329501	0.88207	5.65809e-17	-0.585403	9.95367e-06	0.199312	0.169757	-0.0226878	0.87703	0.800707	4.96885e-12
CRTAM	blue	0.732786	2.15261e-09	-0.413816	0.00311985	0.879579	8.98824e-17	-0.661869	2.2366e-07	-0.550551	4.15645e-05	0.737577	1.49235e-09	0.805107	3.09796e-12	-0.446439	0.00130274	-0.456535	0.000976643	0.425633	0.0022963	0.424845	0.00234452	-0.326829	0.0219006	-0.0526775	0.719241	0.271423	0.0592275	0.91636	2.59915e-20	-0.515606	0.00014976	0.295874	0.0390064	0.00525284	0.971425	0.79454	9.4499e-12
LAPTM5	blue	0.432996	0.00188657	0.145159	0.319658	0.400403	0.00436096	-0.607487	3.68149e-06	-0.139292	0.339811	0.53417	7.71445e-05	0.611838	2.99944e-06	-0.442743	0.00144453	-0.1428	0.327666	0.424097	0.00239111	0.57863	1.3311e-05	-0.375588	0.00782831	-0.205984	0.155625	-0.362415	0.0104954	0.788831	1.68088e-11	0.12689	0.384946	0.696583	2.72015e-08	0.367656	0.00935301	0.591368	7.66376e-06
ALPK2	blue	0.746803	7.2043e-10	-0.298985	0.0369005	0.867505	7.39236e-16	-0.591583	7.59104e-06	-0.504364	0.000219756	0.655371	3.21972e-07	0.754504	3.82915e-10	-0.458067	0.000934145	-0.368746	0.00912936	0.417111	0.0028674	0.398245	0.00459667	-0.337722	0.017634	-0.170453	0.241613	0.2895	0.0436309	0.828978	1.90419e-13	-0.523054	0.000115296	0.256018	0.0758007	-0.0484452	0.740979	0.679554	7.92243e-08
PSMB8-AS1	blue	0.572712	1.70691e-05	0.143133	0.326527	0.545782	4.99297e-05	-0.622673	1.77654e-06	-0.244267	0.0907493	0.615671	2.49776e-06	0.776097	5.71304e-11	-0.500806	0.000247438	-0.197506	0.173737	0.431451	0.00196672	0.509809	0.000182813	-0.417281	0.00285494	-0.290169	0.0431259	-0.284038	0.0479416	0.88981	1.25357e-17	0.0347997	0.812361	0.682204	6.7396e-08	0.344446	0.0153695	0.683807	6.10678e-08
IL7R	blue	0.632677	1.07588e-06	0.0667997	0.648364	0.665633	1.80374e-07	-0.697316	2.5936e-08	-0.289528	0.0436094	0.682625	6.5677e-08	0.812457	1.36925e-12	-0.533746	7.83557e-05	-0.233562	0.106277	0.517791	0.000138785	0.570192	1.89489e-05	-0.363271	0.010301	-0.349517	0.0138303	-0.178632	0.219428	0.930593	3.80367e-22	-0.151625	0.298339	0.610983	3.12338e-06	0.393449	0.00516086	0.817861	7.34143e-13
FYN	blue	0.628003	1.36294e-06	-0.271393	0.0592568	0.763387	1.79376e-10	-0.703257	1.75327e-08	-0.449554	0.00119307	0.700776	2.06709e-08	0.761218	2.16513e-10	-0.487984	0.00037542	-0.356873	0.0118321	0.33883	0.0172424	0.400762	0.0043228	-0.265813	0.0648891	-0.10106	0.48961	0.0912442	0.53294	0.946253	1.11186e-24	-0.396421	0.00480453	0.342538	0.0159854	0.107376	0.462732	0.847546	1.5877e-14
PDE10A	blue	0.548767	4.45293e-05	-0.505972	0.0002082	0.776767	5.36738e-11	-0.473359	0.000592313	-0.536843	6.98904e-05	0.501031	0.000245591	0.620166	2.00896e-06	-0.309391	0.0305249	-0.370339	0.00881091	0.183055	0.208039	0.114246	0.434424	-0.213598	0.140575	0.0934843	0.522889	0.417507	0.00283836	0.755245	3.5989e-10	-0.668234	1.55187e-07	-0.013603	0.926089	-0.153374	0.292733	0.727833	3.11825e-09
GZMK	blue	0.660553	2.4096e-07	0.137464	0.346249	0.628713	1.31515e-06	-0.624352	1.63511e-06	-0.295638	0.0391701	0.621603	1.87248e-06	0.833615	1.05371e-13	-0.51929	0.000131689	-0.242006	0.0938728	0.448947	0.00121378	0.538477	6.5769e-05	-0.445267	0.00134629	-0.337524	0.0177047	-0.227719	0.115571	0.894806	4.45899e-18	-0.00258142	0.985955	0.709125	1.17971e-08	0.347324	0.0144787	0.67088	1.3296e-07
GZMA	blue	0.653928	3.48677e-07	0.0441916	0.763031	0.63671	8.74496e-07	-0.658182	2.75317e-07	-0.371784	0.00853022	0.598465	5.5767e-06	0.848523	1.38062e-14	-0.595657	6.3299e-06	-0.258329	0.0731044	0.518236	0.000136641	0.513382	0.000161733	-0.324418	0.022954	-0.233365	0.106581	-0.120691	0.408772	0.923868	3.10071e-21	-0.173276	0.233789	0.552172	3.90272e-05	0.34748	0.0144318	0.813366	1.23477e-12
AIM2	blue	0.552851	3.8008e-05	-0.180317	0.21504	0.608305	3.54319e-06	-0.64092	7.02082e-07	-0.30514	0.0330086	0.668374	1.5393e-07	0.807564	2.36722e-12	-0.442535	0.0014529	-0.241183	0.09503	0.434201	0.00182607	0.43712	0.00168667	-0.409016	0.00352257	-0.24446	0.0904862	-0.182304	0.209942	0.93567	6.75138e-23	-0.142664	0.328134	0.537516	6.81659e-05	0.311869	0.0291501	0.814065	1.13981e-12
IFI16	blue	0.455894	0.000994934	-0.00871066	0.952632	0.502082	0.000237164	-0.435894	0.00174404	-0.0959643	0.511872	0.417832	0.00281464	0.630666	1.19167e-06	-0.572962	1.68926e-05	-0.0936572	0.522117	0.468843	0.000679105	0.492809	0.000321522	-0.18375	0.206287	-0.587242	9.188e-06	-0.427826	0.00216672	0.767673	1.22947e-10	0.118374	0.417893	0.736991	1.56139e-09	0.709765	1.12913e-08	0.71527	7.70901e-09
RASGRP1	blue	0.664182	1.9604e-07	-0.147809	0.310804	0.757953	2.86348e-10	-0.718548	6.11607e-09	-0.468586	0.00068437	0.688833	4.4644e-08	0.84463	2.39549e-14	-0.539885	6.23993e-05	-0.339075	0.0171567	0.419453	0.00269914	0.450491	0.00116172	-0.384009	0.00645019	-0.143648	0.324773	0.0147441	0.919908	0.957521	4.99768e-27	-0.297397	0.0379631	0.456093	0.000989231	0.199914	0.168444	0.813701	1.18834e-12
OAS3	blue	0.564145	2.4262e-05	0.15137	0.29916	0.508965	0.000188137	-0.611121	3.10303e-06	-0.251118	0.0817782	0.544499	5.243e-05	0.688768	4.48274e-08	-0.485478	0.000406514	-0.174642	0.230067	0.459987	0.000883229	0.579764	1.26841e-05	-0.452565	0.00109494	-0.18517	0.202742	-0.265679	0.0650293	0.789795	1.52706e-11	0.0547025	0.708916	0.664143	1.96481e-07	0.299959	0.0362603	0.599113	5.41511e-06
AC079767.4	blue	0.528782	9.38964e-05	-0.353158	0.0128078	0.787816	1.85881e-11	-0.693893	3.23628e-08	-0.470324	0.000649461	0.688505	4.55765e-08	0.79925	5.79532e-12	-0.397335	0.00469942	-0.365098	0.00989634	0.30679	0.0320253	0.330238	0.0204808	-0.372178	0.00845506	-0.0981	0.50248	0.173984	0.231855	0.90433	5.33931e-19	-0.441356	0.00150118	0.285204	0.0469934	0.0544819	0.710038	0.77529	6.15708e-11
GIMAP2	blue	0.699311	2.27641e-08	-0.0802364	0.583664	0.763487	1.77822e-10	-0.64602	5.35711e-07	-0.434373	0.00181762	0.702122	1.89083e-08	0.789219	1.61732e-11	-0.44603	0.00131783	-0.379727	0.00712199	0.352344	0.0130307	0.432523	0.00191078	-0.252332	0.0802644	-0.178633	0.219425	0.0162784	0.911605	0.935214	7.93211e-23	-0.343112	0.015798	0.399722	0.00443419	0.276143	0.0547781	0.865003	1.1149e-15
MRC1	blue	0.647264	5.01129e-07	-0.212091	0.143463	0.757536	2.9668e-10	-0.651476	3.98879e-07	-0.351156	0.0133617	0.62676	1.45048e-06	0.734227	1.92957e-09	-0.367964	0.00928936	-0.436938	0.00169507	0.293405	0.0407474	0.430721	0.00200564	-0.172332	0.236388	-0.0924641	0.527455	0.26076	0.0703503	0.809529	1.90362e-12	-0.567287	2.13505e-05	0.193194	0.183514	0.0529928	0.71763	0.754148	3.9447e-10
CCL19	blue	0.663345	2.05643e-07	0.372182	0.00845438	0.571151	1.82118e-05	-0.567441	2.12164e-05	-0.208929	0.149669	0.535634	7.30909e-05	0.680612	7.42853e-08	-0.562593	2.58301e-05	-0.220412	0.12805	0.645364	5.54831e-07	0.767097	1.29406e-10	-0.555173	3.47026e-05	-0.328991	0.020991	-0.224525	0.120907	0.768281	1.16452e-10	0.0950193	0.516057	0.819081	6.35957e-13	0.274302	0.0564811	0.467481	0.000707434
HLA-DMB	blue	0.643105	6.25671e-07	0.510398	0.000179169	0.457914	0.000938299	-0.535279	7.40538e-05	-0.113823	0.436138	0.456339	0.000982191	0.687293	4.91742e-08	-0.503937	0.000222919	-0.154648	0.288695	0.515799	0.000148758	0.689098	4.39066e-08	-0.463072	0.000806607	-0.501211	0.000244128	-0.403931	0.00399844	0.726125	3.53685e-09	0.249112	0.0843303	0.894484	4.7732e-18	0.472269	0.000612282	0.441463	0.00149675
PLA2G4C	blue	0.352771	0.0129134	0.0114205	0.937922	0.344177	0.015455	-0.40798	0.00361531	-0.0598979	0.682665	0.50684	0.000202186	0.596056	6.21752e-06	-0.274945	0.0558818	-0.125834	0.388945	0.324319	0.0229985	0.394128	0.00507745	-0.356016	0.0120513	-0.263704	0.0671256	-0.422726	0.00247863	0.742776	9.93774e-10	0.195598	0.178014	0.635326	9.39278e-07	0.440688	0.00152919	0.63502	9.5419e-07
CLIC2	blue	0.669283	1.45991e-07	-0.0592047	0.686147	0.692846	3.4608e-08	-0.665018	1.86865e-07	-0.414238	0.00308647	0.667951	1.57757e-07	0.839301	4.97364e-14	-0.531814	8.40991e-05	-0.369258	0.00902597	0.395974	0.00485672	0.452621	0.00109319	-0.286968	0.0455886	-0.226423	0.117714	-0.0412769	0.778251	0.942367	5.49206e-24	-0.310304	0.0300123	0.433335	0.00186935	0.27154	0.0591141	0.872971	2.92427e-16
RACGAP1	blue	0.574669	1.57297e-05	-0.162927	0.263335	0.603612	4.4073e-06	-0.654176	3.43947e-07	-0.363268	0.0103017	0.590185	8.07488e-06	0.757412	2.9981e-10	-0.4886	0.000368113	-0.306722	0.0320654	0.471123	0.000633951	0.502676	0.000232513	-0.242946	0.0925641	-0.155286	0.286686	0.0521338	0.722022	0.81957	6.0021e-13	-0.324678	0.0228386	0.316092	0.0269256	0.259391	0.0718913	0.832467	1.22209e-13
ABCB4	blue	0.5106	0.000177938	-0.4174	0.00284615	0.830272	1.61719e-13	-0.687862	4.74542e-08	-0.559504	2.92341e-05	0.54073	6.04528e-05	0.692833	3.46378e-08	-0.455221	0.00101447	-0.421339	0.00257005	0.340158	0.0167828	0.275006	0.0558244	-0.291155	0.042389	0.240594	0.095864	0.54377	5.39015e-05	0.740437	1.19466e-09	-0.735963	1.68978e-09	-0.00301157	0.983615	-0.319318	0.0253235	0.637735	8.29225e-07
PLCL2	blue	0.697157	2.62057e-08	-0.0843921	0.564261	0.763318	1.80462e-10	-0.697272	2.60106e-08	-0.350152	0.013647	0.749778	5.65899e-10	0.798148	6.50509e-12	-0.434009	0.0018356	-0.303853	0.033793	0.469019	0.000675523	0.519496	0.000130737	-0.356322	0.0119726	-0.305837	0.0325903	-0.0441185	0.763412	0.935915	6.18971e-23	-0.284129	0.0478671	0.512343	0.000167625	0.240632	0.095811	0.809625	1.88329e-12
BCL2	blue	0.517186	0.000141747	-0.017597	0.904477	0.579169	1.30098e-05	-0.569139	1.97891e-05	-0.158692	0.276116	0.729996	2.65494e-09	0.76163	2.08956e-10	-0.350598	0.0135195	-0.19891	0.170637	0.407838	0.00362813	0.43024	0.00203162	-0.345437	0.0150577	-0.387204	0.00598546	-0.302123	0.0348713	0.86043	2.31393e-15	-0.0573387	0.695552	0.57332	1.66426e-05	0.487257	0.000384211	0.8014	4.6161e-12
SFMBT2	blue	0.438174	0.00163871	0.118501	0.41739	0.358553	0.0114122	-0.540719	6.04774e-05	-0.159359	0.274076	0.578997	1.31052e-05	0.685764	5.40938e-08	-0.357132	0.0117667	-0.131719	0.366966	0.344442	0.0153709	0.415568	0.00298325	-0.187329	0.197433	-0.45856	0.000920809	-0.420929	0.00259765	0.795751	8.34367e-12	0.0397055	0.786491	0.552912	3.79169e-05	0.647009	5.08057e-07	0.844487	2.44404e-14
SNX10	blue	0.673241	1.15679e-07	-0.128571	0.378628	0.724359	4.02482e-09	-0.682669	6.54992e-08	-0.455734	0.000999547	0.663402	2.04985e-07	0.843921	2.64427e-14	-0.494511	0.000304254	-0.331235	0.0200805	0.28339	0.0484751	0.363091	0.0103416	-0.302766	0.0344677	-0.164188	0.259609	0.0115003	0.937489	0.951655	9.79456e-26	-0.369437	0.00898995	0.390091	0.005591	0.210732	0.146107	0.864111	1.28821e-15
CYFIP2	blue	0.702918	1.79335e-08	-0.0656072	0.654241	0.768899	1.10188e-10	-0.710975	1.03904e-08	-0.413816	0.00311985	0.731884	2.30424e-09	0.754322	3.88801e-10	-0.445429	0.00134022	-0.324698	0.0228299	0.330938	0.0201988	0.382265	0.0067169	-0.281504	0.0500563	-0.157655	0.279305	0.0180381	0.902094	0.923164	3.81925e-21	-0.378705	0.00729107	0.361097	0.0108008	0.127111	0.384113	0.823526	3.73439e-13
CD28	blue	0.49243	0.00032549	-0.486719	0.000390838	0.860148	2.41844e-15	-0.625514	1.54345e-06	-0.621384	1.89273e-06	0.65716	2.9149e-07	0.723099	4.41118e-09	-0.354546	0.0124355	-0.471344	0.000629721	0.280479	0.0509324	0.247284	0.0867087	-0.35513	0.0122818	0.162357	0.265032	0.360741	0.0108848	0.820034	5.68019e-13	-0.590899	7.82441e-06	0.0929767	0.525158	-0.129442	0.37538	0.703109	1.77065e-08
DOK3	blue	0.700994	2.03751e-08	-0.0125528	0.931781	0.743482	9.39722e-10	-0.691602	3.74676e-08	-0.339571	0.0169848	0.700069	2.16576e-08	0.826956	2.4511e-13	-0.518221	0.000136716	-0.320101	0.0249471	0.620898	1.93827e-06	0.659223	2.59702e-07	-0.414024	0.00310334	-0.201987	0.163982	0.000617417	0.996641	0.906953	2.86178e-19	-0.219425	0.129809	0.593861	6.86003e-06	0.132617	0.363679	0.677674	8.87658e-08
CYTIP	blue	0.390105	0.00558916	-0.243149	0.0922838	0.559264	2.95147e-05	-0.387082	0.00600262	-0.0734944	0.615766	0.485654	0.000404252	0.613695	2.74566e-06	-0.357009	0.0117978	-0.0531292	0.716934	0.351601	0.0132367	0.38906	0.00572923	-0.296078	0.0388657	-0.520099	0.000127996	-0.400058	0.00439799	0.77652	5.49282e-11	0.138966	0.340953	0.704203	1.64586e-08	0.601956	4.75604e-06	0.655933	3.12089e-07
ISG20	blue	0.574122	1.60943e-05	0.379074	0.00722964	0.433432	0.00186448	-0.46796	0.000697357	-0.0966592	0.508806	0.504903	0.000215817	0.625711	1.52842e-06	-0.498805	0.000264357	-0.0966318	0.508927	0.680708	7.38532e-08	0.735612	1.73591e-09	-0.446218	0.00131088	-0.482887	0.000441102	-0.446214	0.00131104	0.708114	1.2639e-08	0.312946	0.0285687	0.907373	2.58486e-19	0.487633	0.000379635	0.443174	0.00142731
HLA-DQA1	blue	0.71979	5.59777e-09	-0.277357	0.0536787	0.789874	1.51512e-11	-0.703061	1.77636e-08	-0.363296	0.0102954	0.473616	0.000587683	0.745604	7.93332e-10	-0.437552	0.00166685	-0.267807	0.0628291	0.539034	6.44163e-05	0.693173	3.38926e-08	-0.448228	0.0012387	-0.344322	0.0154088	0.0717343	0.624269	0.869605	5.20278e-16	-0.265862	0.0648373	0.575397	1.52573e-05	0.207308	0.152926	0.659949	2.49309e-07
FCRL1	blue	0.623403	1.71365e-06	-0.40071	0.00432839	0.794845	9.15912e-12	-0.727699	3.14929e-09	-0.513867	0.000159051	0.681124	7.20029e-08	0.809653	1.87741e-12	-0.479967	0.000483237	-0.429636	0.0020647	0.42608	0.00226934	0.454697	0.00102992	-0.367837	0.00931541	0.0065411	0.964421	0.192076	0.18611	0.915772	3.04367e-20	-0.421588	0.00255343	0.36574	0.0097575	0.0442479	0.762738	0.750889	5.16636e-10
FAM72A	blue	0.666132	1.75268e-07	-0.463077	0.000806487	0.83445	9.45449e-14	-0.63056	1.19809e-06	-0.600841	5.0052e-06	0.539581	6.31139e-05	0.701097	2.02369e-08	-0.477062	0.000528737	-0.440509	0.00153676	0.412273	0.0032446	0.457812	0.0009411	-0.319049	0.0254541	0.0224269	0.878434	0.298417	0.0372779	0.885083	3.1876e-17	-0.524745	0.000108558	0.258548	0.0728528	-0.0289674	0.843375	0.776852	5.32536e-11
RRM2	blue	0.69029	4.07227e-08	-0.354434	0.0124653	0.805115	3.09527e-12	-0.691538	3.76198e-08	-0.514235	0.000157042	0.679443	7.97614e-08	0.751573	4.88363e-10	-0.484435	0.000420133	-0.475118	0.000561289	0.558052	3.09723e-05	0.580762	1.21557e-05	-0.33289	0.0194306	0.0448039	0.759845	0.332935	0.019413	0.845284	2.1861e-14	-0.514912	0.000153405	0.25652	0.0752083	-0.0213648	0.884151	0.733004	2.11728e-09
CYBB	blue	0.770284	9.72879e-11	-0.364731	0.00997658	0.842563	3.19068e-14	-0.617092	2.33239e-06	-0.443519	0.00141367	0.567889	2.08312e-05	0.840381	4.2984e-14	-0.664843	1.8875e-07	-0.364672	0.00998954	0.587529	9.07338e-06	0.655361	3.2215e-07	-0.32945	0.0208019	-0.152018	0.297074	0.13625	0.350567	0.904906	4.66342e-19	-0.387857	0.00589422	0.486831	0.00038945	0.152658	0.295021	0.743874	9.10894e-10
ACSL5	blue	0.454409	0.00103848	0.237055	0.101001	0.368882	0.00910184	-0.565518	2.2947e-05	-0.11889	0.415853	0.489678	0.000355626	0.63618	8.98765e-07	-0.329852	0.0206375	-0.148631	0.308093	0.26744	0.0632045	0.354913	0.0123388	-0.375472	0.00784897	-0.267826	0.0628104	-0.408204	0.00359501	0.776634	5.4346e-11	0.0833174	0.56925	0.570215	1.89307e-05	0.376503	0.00766716	0.65086	4.12497e-07
GCH1	blue	0.57902	1.30923e-05	-0.0179666	0.90248	0.612211	2.94683e-06	-0.572383	1.73041e-05	-0.239327	0.0976801	0.526275	0.000102771	0.623796	1.68074e-06	-0.43701	0.00169174	-0.0493179	0.73648	0.461078	0.000855413	0.533601	7.8773e-05	-0.18873	0.194044	-0.445697	0.0013302	-0.220323	0.128208	0.783325	2.88169e-11	-0.14394	0.323781	0.527622	9.79113e-05	0.593951	6.83251e-06	0.817604	7.56527e-13
TRBC1	blue	0.488537	0.000368848	0.08863	0.544789	0.451773	0.00112004	-0.547334	4.70507e-05	-0.169437	0.244474	0.54246	5.66391e-05	0.662348	2.17656e-07	-0.386366	0.00610444	-0.163467	0.261735	0.521884	0.000120178	0.597214	5.90141e-06	-0.541593	5.85216e-05	-0.301209	0.0354528	-0.324196	0.0230534	0.745637	7.91253e-10	0.177756	0.221735	0.741277	1.11844e-09	0.282005	0.0496324	0.467003	0.000717634
NLRC5	blue	0.683789	6.11352e-08	0.0930264	0.524936	0.706466	1.41341e-08	-0.60789	3.61271e-06	-0.27089	0.0597482	0.640233	7.27871e-07	0.730047	2.64481e-09	-0.539948	6.22517e-05	-0.283273	0.0485723	0.613582	2.76061e-06	0.703854	1.68469e-08	-0.454381	0.00103933	-0.45024	0.00117003	-0.167162	0.250959	0.884969	3.25833e-17	-0.0291038	0.842646	0.760917	2.22206e-10	0.363015	0.0103587	0.656376	3.045e-07
IRF8	blue	0.642506	6.45807e-07	0.247981	0.0857965	0.599856	5.23521e-06	-0.557289	3.19236e-05	-0.211263	0.145071	0.482929	0.000440519	0.719454	5.73365e-09	-0.542661	5.62114e-05	-0.207152	0.153241	0.561042	2.74909e-05	0.715279	7.70438e-09	-0.461508	0.000844669	-0.475189	0.000560073	-0.276139	0.0547818	0.821777	4.6125e-13	0.0521351	0.722016	0.818142	7.10322e-13	0.451045	0.00114354	0.600973	4.97499e-06
STAP1	blue	0.71064	1.06327e-08	-0.365147	0.00988566	0.868733	6.02375e-16	-0.758877	2.64697e-10	-0.527884	9.69927e-05	0.697285	2.59891e-08	0.826405	2.62449e-13	-0.536968	6.95662e-05	-0.414692	0.00305091	0.428681	0.00211798	0.516488	0.000145237	-0.325597	0.0224339	0.0265028	0.856554	0.230656	0.110826	0.926996	1.19803e-21	-0.47118	0.000632846	0.341745	0.0162474	0.00964241	0.947572	0.775786	5.88051e-11
NUSAP1	blue	0.646948	5.09702e-07	-0.132188	0.365249	0.702158	1.88637e-08	-0.628871	1.30475e-06	-0.36805	0.00927164	0.700905	2.04955e-08	0.724811	3.89417e-09	-0.341087	0.0164675	-0.395441	0.00491957	0.384824	0.0063287	0.452959	0.00108267	-0.382036	0.00675249	-0.167357	0.250397	0.0125134	0.931994	0.900589	1.26075e-18	-0.276784	0.0541959	0.404582	0.00393452	0.146731	0.314388	0.790245	1.45994e-11
LAX1	blue	0.576994	1.42649e-05	-0.4454	0.00134131	0.696367	2.75868e-08	-0.471069	0.000634991	-0.382141	0.00673616	0.464124	0.000781873	0.697678	2.53308e-08	-0.485016	0.000412489	-0.34787	0.014315	0.527578	9.80669e-05	0.598954	5.45424e-06	-0.469015	0.000675602	-0.0539426	0.712785	0.0658443	0.653071	0.817255	7.88099e-13	-0.209956	0.147633	0.490517	0.000346186	0.0641585	0.66141	0.623376	1.71599e-06
BTK	blue	0.476858	0.000532062	-0.319996	0.0249971	0.590366	8.01071e-06	-0.462862	0.000811627	-0.297165	0.038121	0.539942	6.22648e-05	0.753617	4.12314e-10	-0.493321	0.000316238	-0.317502	0.0262151	0.551326	4.03329e-05	0.525258	0.000106584	-0.511809	0.000170723	-0.122234	0.402765	-0.0469222	0.748853	0.825315	3.00156e-13	-0.0865954	0.554097	0.568678	2.01675e-05	0.21743	0.133423	0.607987	3.59632e-06
ALOX5	blue	0.634153	9.97617e-07	0.0203914	0.889396	0.676205	9.6954e-08	-0.352582	0.0129652	-0.232897	0.107306	0.48154	0.000460112	0.707223	1.34281e-08	-0.412217	0.00324926	-0.241799	0.0941629	0.506718	0.000203021	0.527046	9.99641e-05	-0.399244	0.00448625	-0.431472	0.00196559	-0.160522	0.270545	0.809977	1.81059e-12	-0.0518181	0.723638	0.648453	4.70034e-07	0.376126	0.00773317	0.611579	3.03653e-06
GPR171	blue	0.568074	2.06732e-05	-0.206517	0.154533	0.72591	3.59319e-09	-0.585509	9.90814e-06	-0.426133	0.00226619	0.723706	4.22094e-09	0.710923	1.0428e-08	-0.376331	0.00769717	-0.301228	0.0354406	0.264698	0.0660643	0.242789	0.0927811	-0.270795	0.0598413	-0.0778327	0.595023	0.0792697	0.588221	0.834925	8.88641e-14	-0.393011	0.00521526	0.209116	0.149296	0.0666009	0.649342	0.762893	1.87266e-10
F13A1	blue	0.759767	2.45294e-10	0.0496222	0.734913	0.75618	3.32689e-10	-0.486278	0.000396342	-0.273694	0.057052	0.652858	3.69809e-07	0.698927	2.33455e-08	-0.344917	0.0152207	-0.325235	0.0225923	0.52387	0.000111998	0.594878	6.55511e-06	-0.299388	0.0366344	-0.389374	0.00568681	-0.0640195	0.662099	0.811275	1.56513e-12	-0.141832	0.330992	0.589419	8.35197e-06	0.217383	0.13351	0.59541	6.40059e-06
RTN1	blue	0.705256	1.53351e-08	0.0401945	0.783924	0.721889	4.81446e-09	-0.540212	6.16381e-05	-0.45294	0.00108326	0.682815	6.49134e-08	0.788447	1.74619e-11	-0.519059	0.000132761	-0.435628	0.00175668	0.40893	0.0035302	0.385432	0.00623942	-0.242428	0.0932829	0.0496763	0.734635	0.158331	0.277224	0.850468	1.04222e-14	-0.439572	0.00157698	0.279021	0.0522003	0.0768888	0.59951	0.756998	3.10508e-10
CLEC2B	blue	0.511714	0.000171283	-0.163603	0.261334	0.587712	9.00114e-06	-0.619927	2.03249e-06	-0.20482	0.158026	0.63403	1.00396e-06	0.825512	2.9299e-13	-0.509329	0.000185825	-0.199125	0.170165	0.37824	0.00736911	0.416647	0.00290183	-0.307365	0.0316887	-0.253157	0.0792481	-0.234586	0.10471	0.905231	4.31849e-19	-0.138539	0.342456	0.532194	8.29418e-05	0.393211	0.00519028	0.8387	5.39145e-14
LY96	blue	0.530087	8.95578e-05	-0.509205	0.000186607	0.861782	1.86971e-15	-0.465346	0.00075399	-0.591524	7.61118e-06	0.493437	0.000315049	0.627668	1.38602e-06	-0.432196	0.00192767	-0.397792	0.00464756	0.181582	0.211786	0.185857	0.201042	-0.0524022	0.720649	0.234509	0.104827	0.502794	0.000231602	0.707424	1.32463e-08	-0.720852	5.18741e-09	-0.0160331	0.912932	-0.200883	0.166348	0.644438	5.82914e-07
LOC100505549	blue	0.47566	0.000552036	-0.448225	0.0012388	0.746634	7.30355e-10	-0.621671	1.86626e-06	-0.527635	9.78664e-05	0.588292	8.77565e-06	0.616368	2.41526e-06	-0.196274	0.176491	-0.34948	0.0138409	0.174525	0.230385	0.135087	0.354733	-0.189564	0.192043	0.0518336	0.723559	0.414216	0.00308821	0.764017	1.69778e-10	-0.671588	1.27539e-07	-0.00902787	0.950909	-0.124507	0.394005	0.742983	9.77612e-10
SAMSN1	blue	0.650431	4.22255e-07	-0.410747	0.00337237	0.825928	2.78363e-13	-0.75274	4.43487e-10	-0.561625	2.68562e-05	0.698858	2.34513e-08	0.89924	1.70413e-18	-0.539493	6.33207e-05	-0.42708	0.00221005	0.429988	0.00204536	0.472975	0.00059928	-0.367875	0.00930771	-0.0422871	0.772966	0.184113	0.205377	0.936657	4.74703e-23	-0.445768	0.00132753	0.35931	0.0112274	0.127938	0.381002	0.80372	3.60018e-12
MAF	blue	0.593748	6.89457e-06	0.246072	0.0883151	0.500685	0.000248432	-0.421432	0.00256385	-0.208653	0.150219	0.469005	0.000675793	0.702882	1.79765e-08	-0.45125	0.00113689	-0.243045	0.0924268	0.505148	0.000214049	0.510329	0.000179596	-0.256458	0.0752818	-0.451788	0.00111955	-0.249656	0.0836325	0.807775	2.31274e-12	-0.0884422	0.545645	0.571461	1.79793e-05	0.527644	9.78349e-05	0.747071	7.05027e-10
TYMS	blue	0.623684	1.69003e-06	0.0385211	0.792717	0.594517	6.66186e-06	-0.607465	3.68527e-06	-0.288045	0.0447474	0.634378	9.86195e-07	0.687834	4.7537e-08	-0.48127	0.000464	-0.289559	0.0435859	0.50363	0.000225226	0.600356	5.11716e-06	-0.423156	0.00245088	-0.186185	0.200234	-0.125342	0.390817	0.861284	2.02295e-15	-0.109095	0.455558	0.543088	5.53114e-05	0.282055	0.0495901	0.741506	1.09847e-09
JAZF1	blue	0.486694	0.000391147	0.0117376	0.936202	0.482697	0.000443733	-0.612205	2.94758e-06	-0.334054	0.018984	0.604904	4.15174e-06	0.751044	5.10125e-10	-0.499031	0.000262392	-0.199293	0.169797	0.402374	0.00415511	0.335524	0.0184327	-0.193096	0.18374	-0.0369479	0.801007	-0.141601	0.331787	0.835268	8.49607e-14	-0.243692	0.0915356	0.321677	0.0242035	0.289487	0.0436409	0.849017	1.28601e-14
GLYR1	blue	0.690321	4.06414e-08	-0.22903	0.113434	0.792755	1.13355e-11	-0.608778	3.46546e-06	-0.424173	0.00238634	0.633594	1.02662e-06	0.740616	1.17799e-09	-0.485636	0.000404486	-0.335763	0.0183446	0.515444	0.000150605	0.571652	1.78378e-05	-0.301386	0.0353398	-0.340109	0.0167996	0.0349576	0.811525	0.91574	3.07029e-20	-0.340016	0.0168314	0.489982	0.000352177	0.301253	0.0354247	0.845154	2.22637e-14
P2RY8	blue	0.563158	2.52492e-05	-0.193787	0.182146	0.694364	3.13978e-08	-0.699466	2.25342e-08	-0.284623	0.0474645	0.704245	1.64121e-08	0.737122	1.54563e-09	-0.507102	0.000200404	-0.275077	0.0557592	0.473283	0.000593675	0.580703	1.21864e-05	-0.401521	0.00424314	-0.197377	0.174023	-0.128249	0.379835	0.912428	7.31954e-20	-0.114304	0.434189	0.601671	4.81857e-06	0.20787	0.151791	0.691944	3.66607e-08
KBTBD8	blue	0.599737	5.26371e-06	-0.268641	0.0619838	0.733368	2.05978e-09	-0.727846	3.11533e-09	-0.410394	0.00340254	0.670406	1.36711e-07	0.828875	1.92891e-13	-0.514197	0.00015725	-0.312863	0.0286131	0.284099	0.047892	0.392349	0.0052984	-0.324336	0.0229908	-0.0818055	0.576302	0.0185976	0.899072	0.928595	7.2473e-22	-0.344303	0.0154149	0.369477	0.00898206	0.192402	0.18535	0.82729	2.35173e-13
SIGLEC10	blue	0.50112	0.000244874	0.432773	0.00189795	0.334328	0.0188802	-0.534607	7.59117e-05	-0.0950249	0.516032	0.499666	0.000256948	0.714513	8.12887e-09	-0.435211	0.00177671	-0.10357	0.478834	0.391422	0.00541682	0.485551	0.00040558	-0.381102	0.00689991	-0.414183	0.00309078	-0.502702	0.000232313	0.763066	1.84466e-10	0.247312	0.0866721	0.750507	5.33092e-10	0.50323	0.000228253	0.588463	8.70993e-06
TBC1D9	blue	0.605152	4.10422e-06	0.0632486	0.665928	0.622449	1.79624e-06	-0.527986	9.66353e-05	-0.19739	0.173996	0.593989	6.82072e-06	0.747525	6.79669e-10	-0.470501	0.000645993	-0.177926	0.221287	0.438932	0.00160496	0.50136	0.000242928	-0.233789	0.105928	-0.533803	7.81924e-05	-0.30358	0.0339612	0.828386	2.05096e-13	-0.019326	0.895141	0.666173	1.74853e-07	0.637171	8.53827e-07	0.77125	8.91442e-11
SGTB	blue	0.60733	3.70865e-06	0.0516233	0.724636	0.570282	1.8878e-05	-0.62807	1.35837e-06	-0.429869	0.00205191	0.598305	5.61733e-06	0.751812	4.78859e-10	-0.434997	0.0017871	-0.249587	0.0837204	0.242624	0.0930102	0.278601	0.0525702	-0.0474037	0.746361	-0.172677	0.235436	0.00865234	0.952949	0.806007	2.80831e-12	-0.434871	0.00179321	0.219384	0.129884	0.320684	0.0246699	0.877	1.43585e-16
GPR65	blue	0.577085	1.42103e-05	-0.370317	0.00881507	0.747177	6.99064e-10	-0.536209	7.15514e-05	-0.497239	0.000278318	0.707363	1.3301e-08	0.661039	2.34431e-07	-0.361404	0.0107291	-0.347993	0.0142783	0.360593	0.0109197	0.288498	0.044397	-0.28117	0.0503403	0.0452608	0.75747	0.236802	0.101376	0.825757	2.84265e-13	-0.494767	0.000301732	0.189794	0.191495	-0.107033	0.464172	0.723335	4.33623e-09
TMEM200A	blue	0.597183	5.90964e-06	-0.410429	0.00339951	0.820628	5.29246e-13	-0.617349	2.30361e-06	-0.573065	1.68202e-05	0.589049	8.48887e-06	0.686084	5.30271e-08	-0.527779	9.73593e-05	-0.45256	0.00109511	0.376736	0.0076266	0.383625	0.0065081	-0.191663	0.187078	0.0718572	0.623674	0.381503	0.00683639	0.807886	2.28456e-12	-0.607874	3.6154e-06	0.136353	0.3502	-0.0506448	0.729656	0.740989	1.14408e-09
PPP1R16B	blue	0.688058	4.68725e-08	-0.262854	0.0680446	0.824354	3.37629e-13	-0.692262	3.59244e-08	-0.441917	0.00147802	0.691335	3.81099e-08	0.842224	3.34274e-14	-0.626409	1.47613e-06	-0.353486	0.012719	0.48864	0.000367638	0.532962	8.06421e-05	-0.330647	0.0203157	-0.14287	0.327429	0.0783332	0.59265	0.948329	4.509e-25	-0.347955	0.0142895	0.483959	0.000426481	0.141585	0.331841	0.768457	1.14639e-10
BTN3A2	blue	0.512209	0.000168397	0.20419	0.159336	0.459951	0.000884155	-0.285453	0.0467932	-0.193604	0.182567	0.481386	0.000462325	0.654474	3.38341e-07	-0.44995	0.00117972	-0.290214	0.0430916	0.530814	8.72221e-05	0.571009	1.83196e-05	-0.346807	0.0146355	-0.49715	0.000279132	-0.367863	0.00931021	0.709727	1.13208e-08	0.183062	0.208022	0.79282	1.12618e-11	0.670042	1.39657e-07	0.565698	2.27803e-05
S1PR1	blue	0.516396	0.000145705	-0.230057	0.11178	0.647349	4.98834e-07	-0.607066	3.75457e-06	-0.384277	0.00641006	0.60407	4.31496e-06	0.76842	1.1502e-10	-0.545183	5.10829e-05	-0.335402	0.0184779	0.296164	0.0388064	0.360779	0.0108758	-0.283284	0.0485631	-0.145792	0.317527	-0.028873	0.843879	0.905118	4.43525e-19	-0.290594	0.0428071	0.432938	0.00188953	0.258559	0.0728405	0.790438	1.43189e-11
CKS2	blue	0.621961	1.83987e-06	-0.403956	0.00399598	0.767977	1.19659e-10	-0.707671	1.30255e-08	-0.490966	0.000341218	0.536756	7.01174e-05	0.720996	5.13437e-09	-0.564353	2.40585e-05	-0.316176	0.0268831	0.586646	9.4298e-06	0.550336	4.19116e-05	-0.37136	0.00861186	-0.0446735	0.760523	0.230437	0.111174	0.881435	6.3733e-17	-0.428001	0.00215667	0.340414	0.0166954	0.00123707	0.993269	0.758991	2.6214e-10
VNN2	blue	0.554798	3.5218e-05	-0.390539	0.00553181	0.702417	1.8541e-08	-0.667295	1.63879e-07	-0.381462	0.00684287	0.676394	9.58613e-08	0.792765	1.1325e-11	-0.511129	0.00017475	-0.309375	0.0305341	0.404245	0.00396756	0.482749	0.000443014	-0.381278	0.00687193	-0.0234355	0.873011	-0.0325478	0.824305	0.912564	7.06659e-20	-0.236724	0.101493	0.464128	0.000781775	0.197782	0.173124	0.760499	2.30349e-10
PAX5	blue	0.760802	2.2442e-10	-0.17172	0.238081	0.847762	1.53955e-14	-0.707089	1.35503e-08	-0.396472	0.00479864	0.720509	5.31672e-09	0.793492	1.05178e-11	-0.532634	8.1615e-05	-0.332902	0.0194257	0.610814	3.14847e-06	0.7141	8.36686e-09	-0.450686	0.00115529	-0.262275	0.0686762	0.0500747	0.732586	0.922156	5.12966e-21	-0.239859	0.0969151	0.596255	6.16209e-06	0.170074	0.242679	0.697146	2.62244e-08
CPVL	blue	0.607494	3.6803e-06	-0.143454	0.325434	0.681004	7.25313e-08	-0.626083	1.50033e-06	-0.324548	0.0228964	0.704382	1.62622e-08	0.799941	5.38844e-12	-0.423591	0.00242312	-0.302994	0.0343253	0.284815	0.0473086	0.358829	0.0113446	-0.398124	0.00461023	-0.0470024	0.748437	-0.00618718	0.966345	0.85923	2.79051e-15	-0.290943	0.0425467	0.377381	0.00751521	0.0677494	0.643698	0.692203	3.60609e-08
FLJ32255	blue	0.453232	0.00107422	-0.408325	0.00358413	0.675313	1.02269e-07	-0.45971	0.000890398	-0.30781	0.0314296	0.596539	6.08372e-06	0.717177	6.74068e-09	-0.467658	0.000703692	-0.339059	0.0171624	0.305373	0.0328686	0.29295	0.0410753	-0.285792	0.0465212	-0.151301	0.299384	-0.0589216	0.687571	0.868395	6.37458e-16	-0.192398	0.185359	0.44785	0.00125199	0.183979	0.205712	0.72034	5.38169e-09
EZH2	blue	0.430102	0.00203914	-0.213514	0.140735	0.516716	0.000144092	-0.614216	2.67818e-06	-0.286209	0.046189	0.659932	2.49547e-07	0.683421	6.25404e-08	-0.428706	0.00211657	-0.218657	0.131193	0.419742	0.00267901	0.395247	0.00494259	-0.287253	0.0453641	-0.154068	0.290528	-0.171783	0.237907	0.877651	1.27714e-16	-0.146045	0.316679	0.435037	0.00178516	0.337715	0.0176364	0.835392	8.35854e-14
P2RX5	blue	0.646434	5.23974e-07	0.0368801	0.801364	0.678347	8.5232e-08	-0.486034	0.000399423	-0.309618	0.0303964	0.592417	7.31542e-06	0.703443	1.73168e-08	-0.347037	0.0145657	-0.293438	0.0407243	0.489103	0.000362233	0.550194	4.21428e-05	-0.51171	0.000171306	-0.380152	0.00705279	-0.144861	0.320662	0.851052	9.57114e-15	-0.0616935	0.673677	0.635884	9.12636e-07	0.310789	0.0297429	0.626178	1.49327e-06
SYNE1	blue	0.400267	0.00437555	0.214398	0.139058	0.311304	0.0294587	-0.557782	3.13064e-05	-0.0192706	0.89544	0.547537	4.66872e-05	0.594788	6.58139e-06	-0.357238	0.0117398	-0.073795	0.614319	0.374077	0.00810094	0.459307	0.000900973	-0.308408	0.0310851	-0.416913	0.00288204	-0.538403	6.59513e-05	0.740764	1.16441e-09	0.2549	0.0771333	0.715571	7.54803e-09	0.495454	0.000295048	0.61263	2.88864e-06
IDO1	blue	0.479604	0.000488715	0.216064	0.13594	0.397811	0.00464544	-0.548609	4.48023e-05	-0.20103	0.16603	0.64351	6.12357e-07	0.721867	4.82208e-09	-0.434278	0.00182229	-0.166511	0.252836	0.413697	0.00312934	0.408614	0.00355832	-0.337051	0.0178744	-0.256671	0.0750316	-0.312342	0.0288936	0.823999	3.52549e-13	-0.0259053	0.859756	0.581086	1.19885e-05	0.342166	0.0161079	0.685225	5.59387e-08
DOCK11	blue	0.554382	3.57981e-05	0.273065	0.0576486	0.458094	0.000933402	-0.550564	4.15438e-05	-0.239171	0.0979054	0.704965	1.56383e-08	0.736971	1.56377e-09	-0.417735	0.00282173	-0.243405	0.0919304	0.391711	0.00537968	0.380142	0.00705436	-0.307394	0.0316715	-0.374149	0.0080877	-0.367715	0.00934068	0.866652	8.51125e-16	-0.0251993	0.863541	0.563407	2.49965e-05	0.507513	0.000197637	0.808828	2.05818e-12
LOC101929272	blue	0.526171	0.000103155	-0.200548	0.167069	0.640168	7.30362e-07	-0.600418	5.10279e-06	-0.354086	0.012558	0.626905	1.43998e-06	0.788097	1.80783e-11	-0.402549	0.00413725	-0.343384	0.0157097	0.28754	0.0451402	0.367196	0.0094487	-0.479456	0.000490975	-0.0240086	0.869932	0.0120117	0.934715	0.873289	2.76733e-16	-0.302395	0.0347002	0.391618	0.00539159	0.0554214	0.705263	0.711366	1.01147e-08
SEMA4D	blue	0.34927	0.013902	0.199582	0.169166	0.255955	0.0758756	-0.471762	0.000621777	0.0192988	0.895288	0.5077	0.000196391	0.59253	7.27899e-06	-0.350704	0.0134895	-0.0257318	0.860685	0.457258	0.000956375	0.519766	0.000129503	-0.278809	0.0523869	-0.461635	0.00084152	-0.588537	8.68175e-06	0.694072	3.19921e-08	0.364102	0.0101153	0.802833	3.96049e-12	0.624362	1.63426e-06	0.525858	0.000104321
C11orf21	blue	0.525026	0.000107472	-0.0234039	0.873181	0.567796	2.09101e-05	-0.696058	2.81447e-08	-0.272823	0.0578787	0.638471	7.98072e-07	0.692916	3.44544e-08	-0.437186	0.00168362	-0.259817	0.0714082	0.379779	0.00711346	0.43073	0.00200512	-0.337101	0.0178564	-0.0821184	0.57484	-0.0600904	0.6817	0.821635	4.692e-13	-0.199436	0.169486	0.444164	0.00138847	0.0554215	0.705263	0.63572	9.20396e-07
SLC7A7	blue	0.521365	0.000122404	0.169569	0.244099	0.458054	0.00093449	-0.491538	0.00033499	-0.170921	0.240305	0.627619	1.38944e-06	0.765019	1.55494e-10	-0.439843	0.00156524	-0.22071	0.127522	0.516418	0.000145591	0.566664	2.19009e-05	-0.409592	0.00347194	-0.275554	0.0553189	-0.363401	0.0102718	0.809578	1.8933e-12	0.166246	0.253602	0.76969	1.02631e-10	0.447132	0.00127759	0.582947	1.10681e-05
EVI2B	blue	0.695746	2.87193e-08	0.173685	0.232672	0.701554	1.96341e-08	-0.679864	7.77467e-08	-0.298112	0.0374816	0.678292	8.55156e-08	0.812122	1.42235e-12	-0.465235	0.000756483	-0.281902	0.0497194	0.378033	0.00740409	0.536598	7.05289e-05	-0.339294	0.0170806	-0.319858	0.0250634	-0.181439	0.212151	0.927321	1.08254e-21	-0.132024	0.365847	0.631043	1.16916e-06	0.36082	0.0108661	0.747083	7.04378e-10
PLAC8	blue	0.690807	3.94094e-08	-0.346744	0.0146547	0.853975	6.21392e-15	-0.636315	8.92529e-07	-0.538973	6.45645e-05	0.640204	7.28967e-07	0.820993	5.06699e-13	-0.614567	2.63362e-06	-0.387998	0.00587461	0.553031	3.77424e-05	0.576908	1.43172e-05	-0.393202	0.00519147	-0.133377	0.360911	0.15899	0.275204	0.941686	7.18417e-24	-0.398208	0.00460086	0.466156	0.000736024	0.167546	0.249854	0.775488	6.04516e-11
CSTA	blue	0.5714	1.80253e-05	0.066043	0.652091	0.570743	1.85222e-05	-0.574075	1.6126e-05	-0.247436	0.0865089	0.565521	2.29446e-05	0.739255	1.31014e-09	-0.532069	8.33215e-05	-0.191935	0.186441	0.496392	0.000286152	0.570927	1.83817e-05	-0.386898	0.00602866	-0.347437	0.014445	-0.24244	0.0932663	0.885969	2.68465e-17	-0.0307138	0.834062	0.715618	7.5229e-09	0.469249	0.000670861	0.738367	1.40374e-09
IFIT2	blue	0.705246	1.53452e-08	0.303702	0.0338862	0.626537	1.46673e-06	-0.631143	1.16322e-06	-0.28265	0.0490907	0.647581	4.92651e-07	0.739088	1.32727e-09	-0.497333	0.000277464	-0.228368	0.114509	0.466843	0.000721079	0.543879	5.36786e-05	-0.143074	0.326732	-0.324405	0.0229601	-0.144263	0.322684	0.841926	3.4821e-14	-0.226555	0.117495	0.486124	0.000398284	0.394175	0.0050717	0.808767	2.07203e-12
CIITA	blue	0.492207	0.000327847	0.116144	0.426779	0.481306	0.000463485	-0.462571	0.000818621	-0.169122	0.245365	0.706131	1.44569e-08	0.674103	1.09909e-07	-0.326926	0.021859	-0.190893	0.188888	0.460304	0.00087506	0.454752	0.0010283	-0.379215	0.00720621	-0.296453	0.0386071	-0.319782	0.0250999	0.796267	7.91053e-12	0.0984581	0.500914	0.629277	1.27832e-06	0.338547	0.0173417	0.616342	2.41828e-06
IL18	blue	0.522197	0.000118856	-0.321099	0.0244739	0.653479	3.5741e-07	-0.621849	1.85003e-06	-0.34767	0.0143749	0.626134	1.49649e-06	0.77397	6.95388e-11	-0.397573	0.00467237	-0.282083	0.0495666	0.402575	0.00413452	0.362772	0.010414	-0.384673	0.00635113	-0.152344	0.296025	-0.0352624	0.809912	0.923946	3.02964e-21	-0.303967	0.0337233	0.38954	0.0056644	0.199946	0.168375	0.849023	1.28487e-14
TRERF1	blue	0.620341	1.99183e-06	-0.403279	0.0040634	0.827102	2.40709e-13	-0.592569	7.26632e-06	-0.614113	2.69149e-06	0.518149	0.00013706	0.803386	3.73191e-12	-0.476966	0.000530295	-0.465049	0.000760687	0.242264	0.0935112	0.297732	0.0377369	-0.341647	0.0162801	0.0504729	0.730538	0.329844	0.0206407	0.847682	1.55711e-14	-0.592653	7.23928e-06	0.167112	0.251101	-0.0235848	0.872208	0.747939	6.57233e-10
DOCK10	blue	0.727653	3.16007e-09	-0.210441	0.146678	0.818554	6.76672e-13	-0.731984	2.28688e-09	-0.455352	0.00101064	0.720912	5.16519e-09	0.842019	3.43795e-14	-0.572749	1.70431e-05	-0.379666	0.00713197	0.446004	0.00131877	0.559094	2.97157e-05	-0.352513	0.0129841	-0.182329	0.209879	0.0435187	0.766537	0.949155	3.11536e-25	-0.337206	0.0178188	0.506046	0.000207676	0.196295	0.176444	0.788934	1.66377e-11
LEF1	blue	0.59317	7.07471e-06	-0.017548	0.904741	0.683468	6.23565e-08	-0.62955	1.26084e-06	-0.29524	0.0394475	0.742082	1.0498e-09	0.727472	3.20266e-09	-0.382233	0.00672179	-0.285565	0.0467034	0.33473	0.0187288	0.41933	0.00270779	-0.374744	0.00797955	-0.34422	0.0154415	-0.203852	0.160043	0.919746	1.02217e-20	-0.137169	0.347297	0.54679	4.8043e-05	0.35073	0.0134822	0.800963	4.83556e-12
HLA-F	blue	0.612484	2.90877e-06	0.0537096	0.713972	0.610011	3.27006e-06	-0.595026	6.51178e-06	-0.16088	0.269464	0.478071	0.000512512	0.645231	5.58781e-07	-0.591727	7.54279e-06	-0.184305	0.204896	0.647933	4.83404e-07	0.794417	9.56979e-12	-0.390936	0.00547981	-0.47558	0.000553396	-0.230624	0.110876	0.734187	1.93541e-09	0.127779	0.381596	0.814629	1.06836e-12	0.407201	0.00368635	0.491762	0.000332589
VCAM1	blue	0.728589	2.94827e-09	-0.109788	0.452681	0.809307	1.95132e-12	-0.531488	8.5108e-05	-0.328006	0.0214013	0.611745	3.01273e-06	0.789305	1.60355e-11	-0.474195	0.000577377	-0.3002	0.0361035	0.508568	0.000190696	0.609038	3.42338e-06	-0.422908	0.00246688	-0.454713	0.00102943	-0.0926294	0.526714	0.930329	4.14543e-22	-0.201655	0.164691	0.641068	6.96647e-07	0.379419	0.00717251	0.776688	5.40712e-11
RAD51AP1	blue	0.519385	0.000131247	-0.415386	0.0029972	0.807062	2.5016e-12	-0.496304	0.000286974	-0.587708	9.00258e-06	0.492673	0.000322944	0.544927	5.15834e-05	-0.197062	0.174725	-0.418048	0.00279901	0.203345	0.161107	0.229149	0.113241	-0.167451	0.250128	0.420771	0.00260833	0.583794	1.06713e-05	0.651359	4.01433e-07	-0.769989	9.99049e-11	-0.124785	0.392945	-0.339496	0.0170107	0.610522	3.19223e-06
MNDA	blue	0.560024	2.86335e-05	0.181516	0.211955	0.509391	0.000185429	-0.662282	2.18475e-07	-0.237197	0.100792	0.672311	1.22219e-07	0.747094	7.03716e-10	-0.438881	0.00160723	-0.212689	0.142313	0.32388	0.023195	0.383144	0.00658124	-0.314957	0.027509	-0.246699	0.0874809	-0.297844	0.0376619	0.88764	1.93391e-17	-0.0652638	0.655938	0.525088	0.000107235	0.382961	0.00660926	0.80674	2.59186e-12
TMEM255A	blue	0.461504	0.000844768	-0.432627	0.00190544	0.796013	8.12081e-12	-0.572653	1.71113e-05	-0.602346	4.67164e-06	0.469698	0.000661849	0.663194	2.07421e-07	-0.398467	0.0045719	-0.461894	0.000835135	0.333256	0.0192892	0.324137	0.0230799	-0.217779	0.132785	0.364922	0.00993471	0.554445	3.57095e-05	0.695493	2.91922e-08	-0.7275	3.19608e-09	-0.0329963	0.821922	-0.292492	0.0414076	0.635101	9.50215e-07
LCK	blue	0.492787	0.000321753	0.0573891	0.695297	0.486939	0.000388116	-0.570883	1.84148e-05	-0.144843	0.320721	0.613016	2.83614e-06	0.621844	1.85047e-06	-0.374583	0.00800871	-0.168321	0.247639	0.463481	0.000796901	0.572667	1.71015e-05	-0.428924	0.00210433	-0.370617	0.00875615	-0.391157	0.00545111	0.802502	4.10341e-12	0.207925	0.151679	0.765417	1.50135e-10	0.414461	0.00306894	0.55226	3.88941e-05
APOBEC3G	blue	0.661051	2.34273e-07	0.237963	0.0996644	0.621235	1.90654e-06	-0.501974	0.000238016	-0.211146	0.145299	0.470929	0.000637677	0.744709	8.52206e-10	-0.50892	0.000188425	-0.265835	0.0648655	0.536899	6.97453e-05	0.672356	1.21895e-07	-0.378863	0.00726462	-0.444367	0.00138064	-0.232656	0.107679	0.831151	1.44619e-13	-0.00451162	0.975456	0.770111	9.88141e-11	0.51316	0.000162977	0.648074	4.7974e-07
MMP9	blue	0.693869	3.2412e-08	0.0774492	0.596844	0.699698	2.21934e-08	-0.61586	2.47509e-06	-0.33735	0.0177669	0.619256	2.10007e-06	0.763601	1.76055e-10	-0.557083	3.21851e-05	-0.313678	0.0281791	0.689333	4.32593e-08	0.752452	4.54184e-10	-0.521957	0.000119871	-0.374644	0.00799766	-0.105761	0.469527	0.881591	6.19044e-17	-0.0591478	0.686433	0.750036	5.54087e-10	0.307334	0.0317067	0.625391	1.5529e-06
RAB8B	blue	0.579183	1.3002e-05	0.0449286	0.759196	0.569163	1.9769e-05	-0.602272	4.6875e-06	-0.284824	0.0473007	0.56996	1.91304e-05	0.722131	4.73126e-09	-0.483469	0.000433102	-0.178447	0.219913	0.459388	0.000898833	0.559114	2.96924e-05	-0.248975	0.0845065	-0.398042	0.00461938	-0.259759	0.0714746	0.863177	1.49685e-15	-0.0997457	0.495303	0.617322	2.3066e-06	0.582955	1.10644e-05	0.833315	1.09549e-13
HLA-DRA	blue	0.653793	3.51277e-07	0.445972	0.00131997	0.533701	7.84851e-05	-0.531201	8.60013e-05	-0.129262	0.376052	0.377742	0.00745355	0.627503	1.39754e-06	-0.574609	1.57694e-05	-0.117056	0.423131	0.550893	4.10161e-05	0.739198	1.31602e-09	-0.390047	0.00559684	-0.479434	0.000491314	-0.367607	0.00936311	0.692877	3.45406e-08	0.235012	0.104063	0.896469	3.12462e-18	0.493647	0.000312913	0.444318	0.00138253
CD96	blue	0.586238	9.59901e-06	-0.164854	0.257654	0.723251	4.36271e-09	-0.64243	6.48393e-07	-0.448248	0.00123802	0.677473	8.98422e-08	0.793158	1.08816e-11	-0.508531	0.000190934	-0.384787	0.00633422	0.503205	0.000228445	0.429139	0.00209228	-0.34358	0.0156464	-0.0990533	0.498316	0.0890582	0.542839	0.916363	2.59682e-20	-0.367057	0.0094778	0.399566	0.00445114	0.158902	0.275472	0.788004	1.82446e-11
SERPINE2	blue	0.489722	0.000355123	-0.329889	0.0206222	0.633539	1.02951e-06	-0.527673	9.77327e-05	-0.238097	0.0994669	0.557663	3.14539e-05	0.740714	1.16899e-09	-0.547987	4.58864e-05	-0.221424	0.126264	0.479277	0.00049371	0.496265	0.000287336	-0.219999	0.128783	-0.346455	0.0147431	-0.213805	0.140182	0.856306	4.37382e-15	-0.0793988	0.587611	0.607981	3.59739e-06	0.482428	0.000447497	0.775213	6.20081e-11
IL27RA	blue	0.430336	0.00202642	-0.0420048	0.774442	0.525089	0.000107229	-0.551371	4.02628e-05	-0.168601	0.246842	0.76604	1.42114e-10	0.621327	1.89796e-06	-0.277271	0.0537563	-0.122107	0.403256	0.261277	0.0697747	0.270718	0.0599164	-0.326093	0.0222179	-0.266068	0.0646224	-0.24876	0.0847844	0.769595	1.03518e-10	-0.0432407	0.767987	0.467877	0.000699104	0.255711	0.0761659	0.615695	2.49485e-06
TIGIT	blue	0.589665	8.26203e-06	-0.253713	0.0785692	0.710557	1.0694e-08	-0.728917	2.87741e-09	-0.36519	0.00987641	0.733045	2.11074e-09	0.744525	8.64819e-10	-0.410735	0.00337337	-0.237427	0.100452	0.334917	0.018659	0.453502	0.00106594	-0.442993	0.00143453	-0.136931	0.348141	-0.0193145	0.895203	0.883484	4.33139e-17	-0.240161	0.096482	0.456802	0.000969124	0.0952331	0.515108	0.68748	4.86033e-08
GABRP	blue	0.606397	3.87346e-06	-0.403174	0.00407399	0.711653	9.91576e-09	-0.517626	0.000139587	-0.292928	0.0410916	0.433473	0.00186239	0.747546	6.78478e-10	-0.400554	0.00434491	-0.202163	0.163607	0.426308	0.0022557	0.589916	8.17133e-06	-0.516112	0.000147152	-0.254783	0.0772739	-0.0780415	0.594032	0.843655	2.74362e-14	-0.107752	0.461159	0.60084	5.00533e-06	0.230313	0.111372	0.667897	1.58255e-07
TOX2	blue	0.74975	5.67198e-10	-0.263463	0.0673854	0.829573	1.7667e-13	-0.775528	6.02287e-11	-0.453875	0.00105458	0.577996	1.36734e-05	0.824589	3.28064e-13	-0.693653	3.28646e-08	-0.356432	0.0119444	0.563075	2.53333e-05	0.672415	1.21471e-07	-0.37706	0.00757048	-0.112705	0.440689	0.14468	0.321274	0.892836	6.74362e-18	-0.33147	0.019987	0.488887	0.000364747	0.0695679	0.634801	0.685217	5.59643e-08
MYBL1	blue	0.600167	5.1614e-06	-0.257819	0.0736932	0.700652	2.08416e-08	-0.593511	6.96795e-06	-0.427877	0.00216379	0.623073	1.74185e-06	0.665394	1.82876e-07	-0.429302	0.00208319	-0.299733	0.0364081	0.45006	0.00117603	0.456684	0.00097244	-0.361856	0.0106242	-0.188379	0.194888	0.0130744	0.928953	0.919185	1.19653e-20	-0.313069	0.0285031	0.439621	0.00157485	0.185572	0.201746	0.814906	1.03489e-12
PRR11	blue	0.648919	4.5834e-07	-0.238126	0.0994257	0.77979	4.04003e-11	-0.624665	1.6099e-06	-0.494814	0.000301271	0.713549	8.69403e-09	0.752782	4.4192e-10	-0.466235	0.000734295	-0.404294	0.00396274	0.363328	0.0102882	0.35175	0.0131953	-0.304666	0.0332957	0.0218626	0.881471	0.204766	0.158136	0.897765	2.35829e-18	-0.487397	0.000382505	0.264067	0.0667367	0.00876058	0.952361	0.786337	2.15009e-11
GBP5	blue	0.479857	0.00048489	-0.0910606	0.533769	0.522417	0.000117931	-0.580197	1.24524e-05	-0.296024	0.0389025	0.587569	9.05768e-06	0.793696	1.03017e-11	-0.481037	0.000467388	-0.299371	0.0366458	0.356776	0.0118567	0.366001	0.00970142	-0.240643	0.0957947	0.00704734	0.96167	-0.082487	0.573119	0.853554	6.61667e-15	-0.210767	0.146039	0.398316	0.00458879	0.192422	0.185304	0.728331	3.00531e-09
PLA2G7	blue	0.753108	4.3014e-10	-0.422536	0.00249098	0.81854	6.77847e-13	-0.587599	9.04587e-06	-0.451388	0.00113241	0.611474	3.05163e-06	0.849825	1.14429e-14	-0.537706	6.76866e-05	-0.366863	0.00951868	0.540265	6.15157e-05	0.483526	0.000432333	-0.433866	0.00184275	-0.166386	0.253197	0.221614	0.125931	0.876156	1.67018e-16	-0.473634	0.000587352	0.374185	0.00808119	0.033998	0.816608	0.727169	3.27529e-09
BTN3A3	blue	0.800139	5.27682e-12	0.310356	0.0299831	0.755948	3.39265e-10	-0.618168	2.21403e-06	-0.310368	0.0299763	0.612362	2.92571e-06	0.763841	1.72405e-10	-0.536465	7.0876e-05	-0.307422	0.0316551	0.607604	3.66135e-06	0.726505	3.43936e-09	-0.423203	0.00244788	-0.385433	0.00623939	-0.149623	0.304838	0.898837	1.8632e-18	-0.0905889	0.535898	0.715792	7.43189e-09	0.335088	0.0185949	0.706802	1.38161e-08
BCL2A1	blue	0.576512	1.45582e-05	-0.5044	0.000219495	0.783075	2.95187e-11	-0.736402	1.63378e-09	-0.492173	0.000328202	0.667044	1.6627e-07	0.780102	3.92223e-11	-0.514961	0.000153148	-0.281231	0.0502884	0.380703	0.00696374	0.397184	0.0047166	-0.357518	0.0116695	-0.109913	0.452165	0.0801281	0.584174	0.92027	8.81499e-21	-0.328116	0.0213549	0.380687	0.00696625	0.120316	0.41024	0.791991	1.22478e-11
DCK	blue	0.597422	5.84613e-06	0.305982	0.0325041	0.474921	0.000564697	-0.612888	2.85348e-06	-0.21042	0.146719	0.495283	0.000296704	0.710464	1.07626e-08	-0.457768	0.000942303	-0.110819	0.448423	0.351698	0.0132097	0.439427	0.00158327	-0.222201	0.124904	-0.360236	0.0110047	-0.335398	0.0184797	0.828191	2.10155e-13	-0.0757481	0.604952	0.540044	6.20285e-05	0.484739	0.000416114	0.795586	8.48665e-12
AICDA	blue	0.599302	5.36881e-06	-0.506773	0.000202647	0.817579	7.58752e-13	-0.57503	1.54939e-05	-0.585036	1.01133e-05	0.379574	0.00714708	0.681995	6.82658e-08	-0.461728	0.000839212	-0.429058	0.00209683	0.291154	0.0423903	0.353543	0.0127037	-0.341057	0.0164778	0.085781	0.557844	0.470823	0.000639727	0.760533	2.29689e-10	-0.635835	9.14954e-07	0.13329	0.361229	-0.19564	0.177921	0.631926	1.11783e-06
PLEKHG1	blue	0.609546	3.34255e-06	-0.501863	0.000238898	0.876187	1.66082e-16	-0.530524	8.81488e-05	-0.630578	1.19703e-06	0.621994	1.83685e-06	0.587357	9.14174e-06	-0.312555	0.0287787	-0.463718	0.000791334	0.271481	0.0591714	0.278444	0.0527092	-0.103913	0.47737	0.286641	0.0458463	0.529454	9.1638e-05	0.692042	3.64308e-08	-0.730262	2.60275e-09	-0.0587598	0.688386	-0.238576	0.0987688	0.643867	6.00872e-07
DOCK2	blue	0.524838	0.000108196	0.239031	0.0981073	0.463121	0.000805425	-0.542192	5.72162e-05	-0.0935834	0.522447	0.650223	4.2706e-07	0.662826	2.11825e-07	-0.369456	0.00898615	-0.106835	0.465002	0.512601	0.000166144	0.535762	7.27448e-05	-0.400168	0.00438619	-0.439629	0.00157447	-0.453259	0.00107338	0.819954	5.73476e-13	0.186126	0.200379	0.753826	4.052e-10	0.489764	0.000354646	0.65011	4.29685e-07
GPR18	blue	0.731522	2.36795e-09	-0.420632	0.00261781	0.886189	2.57194e-17	-0.671117	1.31126e-07	-0.58168	1.16875e-05	0.674215	1.09184e-07	0.838219	5.75007e-14	-0.563692	2.47101e-05	-0.450206	0.00117118	0.516475	0.000145304	0.593963	6.82877e-06	-0.438529	0.00162283	-0.103398	0.479565	0.221256	0.126559	0.929593	5.26351e-22	-0.426771	0.00222826	0.434801	0.00179661	0.111554	0.4454	0.748346	6.35938e-10
CD8A	blue	0.619805	2.04458e-06	0.342692	0.015935	0.52845	9.50298e-05	-0.673505	1.13883e-07	-0.12257	0.401462	0.542975	5.55471e-05	0.705697	1.48866e-08	-0.465586	0.000748634	-0.086136	0.556209	0.368319	0.00921641	0.535096	7.45558e-05	-0.260968	0.0701186	-0.312861	0.0286139	-0.346879	0.0146136	0.788626	1.71558e-11	0.036432	0.80373	0.659907	2.49908e-07	0.346726	0.0146601	0.587986	8.89382e-06
SLAMF7	blue	0.534905	7.50831e-05	0.0107827	0.941383	0.565449	2.30116e-05	-0.314168	0.0279207	-0.102262	0.484433	0.422054	0.00252259	0.614361	2.65963e-06	-0.35263	0.0129521	-0.217729	0.132877	0.517317	0.000141103	0.657802	2.81231e-07	-0.388822	0.00576148	-0.413421	0.00315141	-0.290891	0.0425857	0.76194	2.0341e-10	0.0650426	0.657031	0.768666	1.12516e-10	0.519566	0.000130416	0.610833	3.14558e-06
CD1D	blue	0.610783	3.1531e-06	-0.149026	0.306794	0.687861	4.74544e-08	-0.679229	8.08035e-08	-0.358896	0.0113281	0.694662	3.08006e-08	0.799968	5.37299e-12	-0.530899	8.69544e-05	-0.288112	0.0446955	0.456928	0.000965591	0.496674	0.000283523	-0.37282	0.00833393	-0.200618	0.166918	-0.110081	0.451468	0.946012	1.23172e-24	-0.189145	0.193046	0.549512	4.32679e-05	0.231877	0.108897	0.769011	1.09087e-10
NAPSB	blue	0.643496	6.12817e-07	0.267656	0.0629832	0.569631	1.93916e-05	-0.516031	0.000147563	-0.282946	0.0488442	0.520454	0.000126404	0.633851	1.01321e-06	-0.492062	0.000329384	-0.205771	0.156061	0.582375	1.13439e-05	0.677414	9.01662e-08	-0.575459	1.52175e-05	-0.316945	0.0264942	-0.215613	0.13678	0.738711	1.3668e-09	0.112638	0.440963	0.782405	3.14847e-11	0.280512	0.0509042	0.447789	0.00125416
CD2	blue	0.681849	6.888e-08	0.130806	0.370328	0.695596	2.89991e-08	-0.609506	3.34886e-06	-0.223299	0.123003	0.63965	7.50438e-07	0.73305	2.11003e-09	-0.535187	7.43053e-05	-0.236368	0.102023	0.568976	1.99218e-05	0.651071	4.07787e-07	-0.39511	0.00495895	-0.454309	0.00104149	-0.26272	0.06819	0.883057	4.69662e-17	0.0226901	0.877018	0.741357	1.11141e-09	0.412991	0.00318603	0.681966	6.83886e-08
LOC101928152	blue	0.372774	0.00834252	-0.00155362	0.991547	0.423035	0.00245866	-0.594157	6.76984e-06	-0.179477	0.217218	0.684162	5.97448e-08	0.669374	1.45219e-07	-0.37225	0.00844141	-0.190645	0.189475	0.272322	0.0583589	0.277312	0.0537189	-0.238706	0.0985799	-0.143337	0.325833	-0.276156	0.054767	0.832074	1.28529e-13	-0.0746996	0.609973	0.435752	0.00175077	0.286636	0.04585	0.740897	1.15234e-09
CD3D	blue	0.547686	4.64209e-05	0.318902	0.0255254	0.447196	0.0012753	-0.564522	2.38936e-05	-0.112526	0.44142	0.604601	4.21031e-06	0.725002	3.84032e-09	-0.502406	0.000234615	-0.158913	0.275438	0.568626	2.02103e-05	0.618104	2.22092e-06	-0.371485	0.00858765	-0.446126	0.00131425	-0.438682	0.00161604	0.795433	8.62144e-12	0.199427	0.169504	0.830219	1.62817e-13	0.527271	9.9157e-05	0.570018	1.90849e-05
STAT4	blue	0.441931	0.00147748	-0.0479931	0.743314	0.51085	0.000176424	-0.44803	0.00124566	-0.274216	0.056561	0.649044	4.55251e-07	0.716003	7.32223e-09	-0.427222	0.00220176	-0.199298	0.169786	0.3756	0.00782614	0.349542	0.0138228	-0.305293	0.0329165	-0.268477	0.0621488	-0.295711	0.0391195	0.851536	8.91675e-15	-0.04509	0.758358	0.568415	2.03861e-05	0.424424	0.00237066	0.739435	1.29189e-09
IL21R	blue	0.507085	0.000200521	-0.103248	0.480208	0.606995	3.76708e-06	-0.557129	3.21258e-05	-0.259617	0.0716349	0.639263	7.65788e-07	0.727164	3.27644e-09	-0.474287	0.000575752	-0.200323	0.167557	0.364583	0.010009	0.361434	0.010722	-0.274434	0.0563577	-0.261326	0.0697212	-0.183516	0.206876	0.884812	3.35886e-17	-0.101917	0.485915	0.542488	5.65805e-05	0.336332	0.0181357	0.725266	3.76684e-09
ITGB2-AS1	blue	0.571078	1.82674e-05	0.0199449	0.891803	0.610242	3.23472e-06	-0.5872	9.20469e-06	-0.184642	0.204056	0.637279	8.49102e-07	0.673804	1.11884e-07	-0.465627	0.000747723	-0.202711	0.162445	0.563104	2.53043e-05	0.592326	7.34505e-06	-0.35599	0.012058	-0.362613	0.0104503	-0.228767	0.11386	0.860194	2.4011e-15	-0.0250658	0.864257	0.643984	5.97168e-07	0.350479	0.0135536	0.706877	1.37463e-08
PCED1B	blue	0.618044	2.22737e-06	-0.306487	0.0322045	0.745408	8.05884e-10	-0.491648	0.000333807	-0.372389	0.00841518	0.61619	2.43614e-06	0.682957	6.435e-08	-0.460815	0.000862028	-0.287242	0.0453728	0.457786	0.000941814	0.446779	0.00129037	-0.336167	0.018196	-0.238148	0.099393	-0.0135885	0.926167	0.865314	1.05982e-15	-0.187925	0.195987	0.533494	7.90829e-05	0.196731	0.175466	0.659164	2.60577e-07
LINC00926	blue	0.526863	0.000100624	-0.119372	0.413953	0.615835	2.47809e-06	-0.588796	8.58366e-06	-0.194792	0.179845	0.678748	8.31897e-08	0.74107	1.13682e-09	-0.416741	0.00289486	-0.173072	0.23435	0.345034	0.015184	0.412909	0.00319269	-0.330157	0.0205135	-0.298029	0.0375371	-0.281166	0.0503436	0.895449	3.88908e-18	-0.0173179	0.905985	0.622809	1.76463e-06	0.381197	0.00688481	0.725258	3.7691e-09
FCGR2B	blue	0.744455	8.69711e-10	0.193207	0.183483	0.717877	6.41462e-09	-0.615018	2.57726e-06	-0.340025	0.0168282	0.673727	1.12394e-07	0.775209	6.20304e-11	-0.432843	0.00189435	-0.33757	0.0176883	0.520946	0.00012423	0.633371	1.03842e-06	-0.437848	0.00165341	-0.186493	0.199479	-0.109914	0.45216	0.872385	3.23671e-16	-0.104583	0.474517	0.636096	9.02684e-07	0.237543	0.10028	0.621655	1.86768e-06
LGALS2	blue	0.471155	0.000633327	0.350316	0.0136	0.324128	0.0230835	-0.549872	4.26712e-05	-0.083075	0.570378	0.67648	9.53687e-08	0.736029	1.68124e-09	-0.410739	0.003373	-0.15579	0.285104	0.422334	0.00250419	0.455386	0.00100965	-0.331564	0.0199499	-0.319112	0.0254235	-0.478855	0.000500209	0.781374	3.47505e-11	0.18962	0.191909	0.701092	2.02446e-08	0.45328	0.00107275	0.585301	9.99788e-06
C1orf162	blue	0.389763	0.00563457	0.244161	0.0908936	0.285746	0.0465582	-0.457347	0.000953898	-0.0102431	0.944311	0.614592	2.63047e-06	0.594106	6.78541e-06	-0.352271	0.0130508	-0.083878	0.566645	0.400466	0.00435424	0.480096	0.000481303	-0.332709	0.0195005	-0.375968	0.00776109	-0.536471	7.08612e-05	0.670695	1.34415e-07	0.350686	0.0134946	0.769201	1.07248e-10	0.520747	0.000125107	0.464846	0.000765289
RTP4	blue	0.556264	3.32436e-05	0.225066	0.11999	0.496374	0.000286322	-0.589287	8.40074e-06	-0.15364	0.291889	0.697958	2.48723e-08	0.674264	1.08865e-07	-0.412385	0.0032354	-0.125523	0.390127	0.483326	0.000435056	0.524957	0.000107738	-0.245604	0.0889413	-0.286705	0.0457953	-0.380469	0.0070014	0.836054	7.66284e-14	0.0548277	0.708279	0.633784	1.0167e-06	0.449551	0.00119315	0.732259	2.23994e-09
CCR6	blue	0.624263	1.64231e-06	-0.481929	0.000454538	0.802192	4.24208e-12	-0.610675	3.16921e-06	-0.509222	0.0001865	0.567744	2.09545e-05	0.852641	7.57721e-15	-0.608123	3.57347e-06	-0.387932	0.00588383	0.539389	6.35676e-05	0.546872	4.78925e-05	-0.416781	0.0028919	0.0386857	0.791851	0.235741	0.102962	0.860336	2.34814e-15	-0.424861	0.00234354	0.372892	0.00832048	0.03418	0.815644	0.679219	8.08481e-08
NDC80	blue	0.563095	2.53129e-05	-0.168764	0.24638	0.66264	2.14082e-07	-0.649292	4.49177e-07	-0.375015	0.00793078	0.776569	5.46763e-11	0.692651	3.50431e-08	-0.335229	0.0185423	-0.291001	0.0425036	0.335016	0.0186218	0.411879	0.00327721	-0.318814	0.0255685	-0.142609	0.328322	-0.03573	0.807439	0.889757	1.26717e-17	-0.278558	0.0526087	0.399021	0.00451072	0.199369	0.169632	0.786243	2.16994e-11
CARD16	blue	0.511798	0.000170787	-0.150776	0.301083	0.589471	8.3329e-06	-0.583077	1.10067e-05	-0.252548	0.0799977	0.639949	7.3879e-07	0.71126	1.01883e-08	-0.42035	0.00263707	-0.216489	0.135153	0.332272	0.0196712	0.391765	0.00537283	-0.230131	0.111663	-0.268686	0.0619382	-0.205249	0.157138	0.860258	2.3772e-15	-0.15742	0.280032	0.464979	0.000762273	0.383837	0.00647608	0.824345	3.38008e-13
GMFG	blue	0.512725	0.000165434	0.262706	0.0682053	0.439964	0.00156004	-0.507434	0.00019817	-0.0764663	0.601523	0.641747	6.72185e-07	0.689879	4.17939e-08	-0.410715	0.00337507	-0.135291	0.354	0.476847	0.000532246	0.536787	7.00363e-05	-0.396349	0.0048129	-0.439133	0.00159614	-0.501912	0.000238506	0.805383	3.00637e-12	0.231733	0.109122	0.806897	2.5475e-12	0.531814	8.41015e-05	0.603498	4.4305e-06
ZKSCAN7	darkgreen	0.211469	0.14467	-0.418496	0.00276682	0.721032	5.12084e-09	-0.348442	0.0141451	-0.546952	4.77458e-05	0.134533	0.356727	0.274481	0.0563135	-0.193941	0.181793	-0.442439	0.0014568	-0.058282	0.690792	-0.0632066	0.666137	0.00104566	0.994311	0.464903	0.000764007	0.785443	2.34638e-11	0.384661	0.00635293	-0.889798	1.25661e-17	-0.462742	0.000814508	-0.501399	0.000242613	0.480408	0.000476647
CDC23	darkgreen	0.13279	0.36305	-0.480199	0.000479754	0.637819	8.25613e-07	-0.191691	0.187011	-0.545923	4.9661e-05	-0.0238413	0.870831	0.0652985	0.655767	-0.0582972	0.690715	-0.28327	0.0485744	-0.0532706	0.716212	-0.127704	0.38188	0.0228607	0.876101	0.513848	0.000159157	0.89412	5.15472e-18	0.199044	0.170342	-0.929937	4.70977e-22	-0.576911	1.43149e-05	-0.618892	2.13754e-06	0.316718	0.0266082
ZNF738	darkgreen	0.40294	0.00409751	-0.575702	1.50625e-05	0.786582	2.09897e-11	-0.334689	0.0187442	-0.60247	4.64506e-06	0.281101	0.0503993	0.403337	0.00405759	-0.181187	0.212798	-0.492141	0.000328545	0.336501	0.0180739	0.169489	0.244327	-0.272936	0.057771	0.0910412	0.533856	0.629284	1.27788e-06	0.573666	1.64037e-05	-0.732809	2.14879e-09	-0.148627	0.308104	-0.231142	0.110055	0.6323	1.09674e-06
FAM76B	darkgreen	0.285131	0.0470527	-0.346267	0.0148008	0.628521	1.32797e-06	-0.257134	0.0744897	-0.561395	2.71047e-05	0.13338	0.360903	0.214763	0.138371	-0.152591	0.295233	-0.45429	0.00104205	0.12865	0.378333	0.0489368	0.738444	-0.0323248	0.82549	0.54024	6.15739e-05	0.833591	1.05706e-13	0.273297	0.0574278	-0.876008	1.71473e-16	-0.453839	0.00105567	-0.521113	0.000123501	0.372056	0.00847836
MANEA	darkgreen	0.382194	0.0067279	-0.410608	0.00338416	0.818811	6.56536e-13	-0.444543	0.00137385	-0.647813	4.86532e-07	0.185859	0.201038	0.392966	0.00522082	-0.236788	0.101398	-0.459633	0.000892426	0.0367382	0.802114	0.0620197	0.672049	-0.0412979	0.778141	0.396175	0.00483323	0.766765	1.33282e-10	0.496252	0.000287462	-0.898051	2.21533e-18	-0.336554	0.0180547	-0.423492	0.00242941	0.547868	4.60969e-05
HOOK3	darkgreen	0.133258	0.361346	-0.466155	0.000736047	0.656355	3.04854e-07	-0.235513	0.103305	-0.559977	2.86871e-05	-0.047835	0.744131	0.0646601	0.658924	-0.0613846	0.67522	-0.312208	0.0289657	-0.0287085	0.844758	-0.0911088	0.533551	0.139371	0.339535	0.473685	0.000586444	0.855672	4.81534e-15	0.229088	0.11334	-0.882728	4.99854e-17	-0.507288	0.000199147	-0.491222	0.000338417	0.368233	0.00923397
ZNF92	darkgreen	0.511187	0.0001744	-0.15406	0.290554	0.683413	6.25694e-08	-0.664215	1.95675e-07	-0.568535	2.0286e-05	0.527497	9.83536e-05	0.582765	1.11554e-05	-0.329347	0.0208443	-0.363042	0.0103527	0.0883506	0.546062	0.105604	0.470189	-0.0967358	0.508469	0.388727	0.00577449	0.501085	0.000245151	0.659515	2.55485e-07	-0.784475	2.57812e-11	-0.215063	0.137808	-0.294025	0.0403046	0.733879	1.98139e-09
E2F3	darkgreen	0.33771	0.017638	-0.514974	0.000153078	0.817195	7.93564e-13	-0.431791	0.00194882	-0.547753	4.63005e-05	0.193728	0.182282	0.377529	0.00748987	-0.333232	0.0192985	-0.348937	0.0139993	0.180509	0.214542	0.105556	0.470395	-0.166675	0.25236	0.35373	0.0126533	0.696476	2.73921e-08	0.528278	9.56221e-05	-0.85087	9.82939e-15	-0.246593	0.0876214	-0.478278	0.00050924	0.520725	0.000125204
NAP1L3	darkgreen	0.311953	0.0291041	-0.338224	0.0174554	0.657635	2.83866e-07	-0.294213	0.0401713	-0.578376	1.34551e-05	0.290706	0.0427232	0.339202	0.0171126	-0.197512	0.173724	-0.39244	0.0052869	0.0267374	0.855298	-0.0725533	0.620306	-0.000563005	0.996937	0.346491	0.0147319	0.68333	6.28915e-08	0.443284	0.00142296	-0.869624	5.18534e-16	-0.386087	0.00614454	-0.341747	0.0162469	0.567488	2.11754e-05
ZCCHC8	darkgreen	0.02323	0.874115	-0.464309	0.000777599	0.596723	6.03365e-06	-0.172714	0.235334	-0.491382	0.000336686	0.071421	0.625788	0.0938838	0.521107	-0.115651	0.428757	-0.277101	0.0539089	0.000168212	0.999085	-0.215583	0.136835	0.155711	0.285352	0.430621	0.00201097	0.779161	4.28776e-11	0.251834	0.0808824	-0.82479	3.20117e-13	-0.530442	8.84102e-05	-0.45644	0.000979342	0.377149	0.00755504
LRCH3	darkgreen	0.212069	0.143507	-0.641741	6.72401e-07	0.777045	5.23026e-11	-0.241212	0.0949891	-0.47116	0.000633231	0.110701	0.448911	0.100616	0.49153	-0.0593748	0.685292	-0.311708	0.0292376	0.173103	0.234264	0.138893	0.341209	-0.162764	0.26382	0.354882	0.0123468	0.75798	2.85706e-10	0.34875	0.0140541	-0.71917	5.85097e-09	-0.289687	0.0434893	-0.47221	0.000613376	0.38566	0.00620624
RFTN2	darkgreen	0.250066	0.0831092	-0.355686	0.0121368	0.731439	2.3827e-09	-0.335852	0.0183117	-0.430272	0.00202989	-0.00293609	0.984026	0.125896	0.38871	-0.0387043	0.791753	-0.302421	0.0346839	-0.125019	0.392049	-0.036102	0.805473	-0.0300463	0.837618	0.526329	0.000102572	0.814315	1.10763e-12	0.260155	0.071028	-0.834147	9.83481e-14	-0.492027	0.000329748	-0.646732	5.15646e-07	0.303041	0.034296
STX11	darkgreen	0.350307	0.0136027	-0.562281	2.61569e-05	0.812691	1.33337e-12	-0.411244	0.00333031	-0.576316	1.46787e-05	0.302223	0.0348085	0.334388	0.0188577	-0.176398	0.225343	-0.447756	0.00125534	0.131337	0.368369	0.104913	0.473117	-0.245637	0.0888972	0.408092	0.00360515	0.787507	1.91638e-11	0.460848	0.000861201	-0.849105	1.26977e-14	-0.29317	0.0409168	-0.620444	1.9818e-06	0.40785	0.00362702
NIPSNAP3B	darkgreen	0.303882	0.0337754	-0.425069	0.00233074	0.669454	1.44538e-07	-0.385226	0.00626957	-0.552229	3.89404e-05	0.282317	0.0493697	0.263249	0.0676163	-0.150954	0.300506	-0.394953	0.00497773	-0.0343191	0.814907	-0.0569323	0.697606	0.141385	0.332533	0.480858	0.000470011	0.805812	2.86883e-12	0.344151	0.0154634	-0.896616	3.02695e-18	-0.478486	0.000505973	-0.464719	0.000768196	0.442839	0.00144067
TMEM38B	darkgreen	0.262302	0.0686463	-0.443307	0.00142206	0.695738	2.87326e-08	-0.322797	0.0236863	-0.6279	1.36999e-06	0.228903	0.113639	0.278703	0.0524809	-0.115055	0.431156	-0.330199	0.0204963	0.0197759	0.892714	-0.067905	0.642934	0.053315	0.715985	0.453276	0.00107287	0.778879	4.40344e-11	0.401835	0.00421054	-0.927361	1.06919e-21	-0.432797	0.00189675	-0.389302	0.00569651	0.519306	0.000131614
TM6SF1	darkgreen	0.441572	0.00149225	-0.462791	0.000813325	0.864821	1.14834e-15	-0.37612	0.00773435	-0.681497	7.03793e-08	0.186623	0.199159	0.348386	0.0141617	-0.140297	0.336306	-0.457605	0.000946782	0.0495626	0.73522	0.0683636	0.640687	-0.244755	0.0900861	0.336409	0.0181077	0.797862	6.70231e-12	0.472596	0.000606226	-0.883007	4.74186e-17	-0.311345	0.0294361	-0.478762	0.000501659	0.474298	0.000575566
LOC158402	darkgreen	0.294069	0.0402733	-0.519627	0.000130139	0.647695	4.89646e-07	-0.194049	0.181543	-0.49115	0.000339209	0.104809	0.473561	0.118308	0.418156	-0.0887442	0.544269	-0.33009	0.0205405	0.0172924	0.906122	-0.0709577	0.628036	0.140582	0.335312	0.39272	0.00525168	0.821765	4.61946e-13	0.307477	0.0316233	-0.908831	1.81004e-19	-0.47905	0.000497194	-0.454943	0.00102262	0.447358	0.00126949
TTF2	darkgreen	0.347084	0.0145515	-0.430444	0.00202054	0.685316	5.56235e-08	-0.419614	0.00268794	-0.59198	7.45871e-06	0.35196	0.0131369	0.337764	0.0176189	-0.233272	0.106725	-0.388457	0.00581137	0.175609	0.227456	0.105942	0.468765	-0.0726021	0.620071	0.472558	0.000606925	0.634512	9.79409e-07	0.540614	6.07172e-05	-0.790121	1.47807e-11	-0.282832	0.0489387	-0.328193	0.0213229	0.654126	3.44895e-07
NLGN4X	darkgreen	0.270483	0.060148	-0.282318	0.0493685	0.532607	8.16978e-05	-0.0822045	0.574437	-0.457598	0.000946983	0.00554769	0.969822	0.0889837	0.543178	-0.0331934	0.820877	-0.3424	0.0160307	0.0239263	0.870374	-0.070847	0.628574	-0.0949971	0.516155	0.221067	0.126892	0.765422	1.50077e-10	0.213487	0.140785	-0.840174	4.42044e-14	-0.421966	0.00252837	-0.47256	0.00060689	0.28531	0.046908
POP7	darkgreen	-0.112274	0.442452	0.543711	5.40212e-05	-0.63683	8.69084e-07	-0.232867	0.107352	0.449359	0.00119967	-0.0118295	0.935703	-0.0220843	0.880277	-0.0264943	0.8566	0.378892	0.0072599	0.161678	0.267062	0.291434	0.042183	-0.175376	0.228084	-0.479106	0.000496337	-0.701294	1.99746e-08	-0.169525	0.244223	0.790003	1.49566e-11	0.469849	0.000658833	0.322953	0.023615	-0.312147	0.0289987
P4HB	darkgreen	-0.334379	0.0188609	0.176485	0.225111	-0.501002	0.000245833	0.462808	0.000812907	0.36885	0.00910826	-0.417918	0.00280846	-0.391872	0.00535905	0.120515	0.409461	0.26404	0.0667649	0.0503656	0.73109	0.0985493	0.500515	-0.0353161	0.809628	-0.288408	0.0444662	-0.429721	0.00206001	-0.495461	0.000294982	0.776635	5.43389e-11	0.360145	0.0110263	0.342198	0.0160973	-0.603994	4.33019e-06
TRMT10A	darkgreen	0.135883	0.351878	-0.395767	0.00488098	0.478625	0.000503791	-0.172597	0.235657	-0.428459	0.00213055	0.0182544	0.900925	0.000126859	0.99931	-0.00823585	0.955211	-0.2455	0.0890812	-0.120159	0.410859	-0.160262	0.27133	0.343662	0.0156201	0.339065	0.0171603	0.73369	2.00993e-09	0.209739	0.14806	-0.876674	1.52251e-16	-0.56746	2.11997e-05	-0.380779	0.00695158	0.446661	0.00129464
VASH2	darkgreen	0.321608	0.0242356	-0.505802	0.000209392	0.771725	8.53821e-11	-0.372366	0.00841951	-0.624476	1.62507e-06	0.338538	0.0173449	0.50725	0.000199408	-0.284689	0.0474104	-0.478045	0.000512929	0.17857	0.219592	0.0323834	0.825178	-0.0840244	0.565965	0.394775	0.00499913	0.738343	1.40638e-09	0.516783	0.000143752	-0.80938	1.93541e-12	-0.271025	0.0596162	-0.356873	0.0118322	0.531169	8.61015e-05
MYNN	darkgreen	0.151575	0.298501	-0.47359	0.000588153	0.648814	4.60942e-07	-0.307569	0.0315695	-0.501551	0.000241388	0.101439	0.487976	0.142807	0.327645	-0.107196	0.463486	-0.255938	0.0758955	-0.0818924	0.575896	-0.077061	0.59869	0.109627	0.453349	0.433691	0.00185145	0.739757	1.25986e-09	0.335736	0.0183544	-0.847917	1.50578e-14	-0.398636	0.00455321	-0.417783	0.00281822	0.436361	0.00172199
OIP5	darkgreen	0.366211	0.00965661	-0.431698	0.00195369	0.777542	4.99255e-11	-0.323668	0.0232905	-0.527332	9.89394e-05	0.081773	0.576455	0.257977	0.0735103	-0.0930804	0.524694	-0.360461	0.0109511	0.0252869	0.863071	0.0278191	0.84951	-0.160767	0.269805	0.387486	0.00594585	0.76865	1.12675e-10	0.375111	0.00791345	-0.817352	7.79157e-13	-0.36157	0.0106904	-0.619073	2.11885e-06	0.355515	0.0121811
ZNF236	darkgreen	0.251922	0.0807729	-0.455444	0.00100795	0.647405	4.97355e-07	-0.532881	8.08807e-05	-0.50086	0.000246988	0.317229	0.0263516	0.260633	0.070492	-0.138755	0.341694	-0.330014	0.0205716	0.0828461	0.571444	0.0834132	0.568804	0.115401	0.429764	0.438457	0.00162604	0.716993	6.82866e-09	0.433931	0.0018395	-0.861886	1.83896e-15	-0.379849	0.00710205	-0.403132	0.00407816	0.572063	1.75361e-05
INPP5D	darkgreen	-0.220082	0.128635	0.0608383	0.677952	-0.308204	0.0312024	0.300351	0.0360055	0.362108	0.0105659	-0.290343	0.0429951	-0.183628	0.206595	-0.0166721	0.909476	0.149436	0.30545	0.154352	0.289632	0.198932	0.170588	-0.265698	0.065009	-0.495345	0.0002961	-0.542681	5.61688e-05	-0.226157	0.118159	0.813632	1.19781e-12	0.566016	2.24868e-05	0.406032	0.00379545	-0.393349	0.00517317
LINC00622	darkgreen	0.253756	0.078517	-0.162718	0.263956	0.396582	0.00478582	-0.216804	0.134573	-0.400662	0.00433345	0.154039	0.29062	0.105383	0.471128	-0.0664575	0.650048	-0.339646	0.0169587	-0.0357046	0.807573	-0.0988803	0.49907	0.217875	0.132611	0.397673	0.00466097	0.715093	7.8052e-09	0.218683	0.131145	-0.825013	3.11469e-13	-0.511353	0.000173415	-0.390669	0.00551478	0.398513	0.00456684
KIAA1211	darkgreen	0.230264	0.11145	-0.240398	0.0961432	0.550317	4.19422e-05	-0.432518	0.00191106	-0.531695	8.44667e-05	0.250203	0.0829352	0.30789	0.0313836	0.0501321	0.73229	-0.294672	0.0398463	0.0406841	0.781357	0.0793694	0.58775	-0.170072	0.242685	0.372404	0.00841221	0.70714	1.35039e-08	0.338124	0.0174908	-0.821469	4.786e-13	-0.381536	0.00683116	-0.403695	0.00402188	0.410325	0.00340848
ZNF718	darkgreen	0.257435	0.0741384	-0.26977	0.0608529	0.566464	2.20804e-05	-0.469604	0.000663713	-0.471694	0.000623078	0.326885	0.0218766	0.265554	0.0651606	-0.0758233	0.604592	-0.371615	0.00856268	-0.0687677	0.63871	0.000547868	0.997019	-0.061023	0.677028	0.50887	0.000188749	0.733313	2.06826e-09	0.340008	0.0168344	-0.840617	4.16282e-14	-0.445909	0.0013223	-0.52383	0.000112156	0.415842	0.00296241
LOC440416	darkgreen	0.134065	0.358417	-0.429343	0.00208095	0.662923	2.10659e-07	-0.322375	0.0238801	-0.435767	0.00175008	0.073803	0.614281	0.179686	0.216676	-0.142547	0.328536	-0.304851	0.0331836	0.042757	0.770511	-0.0126756	0.931115	-0.0814716	0.577865	0.600985	4.9724e-06	0.83354	1.06396e-13	0.237796	0.0999086	-0.855089	5.2581e-15	-0.460575	0.000868124	-0.701506	1.96966e-08	0.235171	0.103822
HELLS	darkgreen	0.449196	0.00120522	-0.505149	0.000214042	0.772886	7.68092e-11	-0.545479	5.05089e-05	-0.608952	3.4373e-06	0.479502	0.000490273	0.59526	6.44379e-06	-0.318341	0.0258	-0.56298	2.54308e-05	0.303438	0.0340493	0.216008	0.136044	-0.137436	0.34635	0.179586	0.216935	0.541384	5.89841e-05	0.701113	2.02152e-08	-0.712812	9.15115e-09	-0.0819622	0.57557	-0.156612	0.282541	0.737345	1.51929e-09
RAPGEF4	darkgreen	0.280149	0.0512172	-0.415429	0.00299389	0.720583	5.28862e-09	-0.292883	0.0411239	-0.50223	0.000235996	0.089982	0.538645	0.220175	0.12847	-0.163538	0.261527	-0.41209	0.00325974	0.0388009	0.791245	0.0465264	0.750903	-0.0505369	0.73021	0.51665	0.00014442	0.806859	2.55809e-12	0.321048	0.0244977	-0.863827	1.34854e-15	-0.444749	0.00136598	-0.574589	1.57826e-05	0.372828	0.00833237
SEPW1	darkgreen	-0.220909	0.12717	0.274124	0.0566478	-0.504	0.000222451	0.477524	0.000521239	0.351023	0.0133992	-0.301289	0.0354018	-0.159517	0.273594	0.110412	0.450101	0.121495	0.405636	0.108845	0.456596	0.140852	0.334378	-0.242261	0.0935154	-0.479372	0.000492254	-0.524389	0.000109945	-0.334846	0.0186853	0.794124	9.86075e-12	0.491978	0.000330271	0.451974	0.00111362	-0.514951	0.0001532
CSNK1D	darkgreen	-0.342386	0.0160353	0.0327726	0.82311	-0.384956	0.0063093	0.23204	0.108641	0.336781	0.0179723	-0.116378	0.425841	-0.0951824	0.515333	0.0697138	0.63409	0.213389	0.140973	0.166958	0.251545	0.128486	0.378945	-0.280865	0.0506011	-0.223672	0.122363	-0.584079	1.05411e-05	-0.147566	0.311611	0.766519	1.36218e-10	0.497785	0.000273372	0.447544	0.00126284	-0.265168	0.0655666
ZNF850	darkgreen	0.203611	0.160548	-0.467188	0.000713677	0.693575	3.30304e-08	-0.168324	0.247632	-0.563065	2.53437e-05	0.0782741	0.59293	0.161912	0.266361	-0.102226	0.484586	-0.438725	0.00161411	-0.00293704	0.984021	-0.0654128	0.655201	0.0735297	0.615596	0.547138	4.7406e-05	0.877008	1.43382e-16	0.257177	0.074439	-0.886959	2.21184e-17	-0.496637	0.00028386	-0.52758	9.80609e-05	0.31891	0.0255218
TMEM219	darkgreen	-0.299892	0.0363042	0.288539	0.0443653	-0.529548	9.13284e-05	0.308206	0.0312012	0.529741	9.06889e-05	-0.252687	0.0798259	-0.31347	0.0282894	0.142043	0.330265	0.352619	0.0129551	0.00957244	0.947952	0.0784156	0.592259	-0.0732809	0.616795	-0.414521	0.00306424	-0.597914	5.71766e-06	-0.417082	0.00286956	0.892247	7.61948e-18	0.416128	0.00294078	0.305439	0.0328286	-0.588331	8.76049e-06
HDLBP	darkgreen	-0.266987	0.0636699	0.139749	0.338214	-0.457042	0.000962403	0.416638	0.0029025	0.317981	0.0259778	-0.263842	0.0669777	-0.111105	0.447247	0.00695453	0.962174	0.191447	0.187584	0.14505	0.320025	0.145798	0.317508	-0.139479	0.339157	-0.433966	0.00183776	-0.627755	1.38e-06	-0.237282	0.100666	0.777735	4.90309e-11	0.526246	0.000102878	0.697346	2.58861e-08	-0.291229	0.0423344
PDZK1IP1	darkgreen	-0.194582	0.180323	0.131227	0.368776	-0.369344	0.00900855	0.286722	0.0457819	0.371418	0.00860057	-0.260096	0.0710943	-0.25694	0.0747164	0.0525219	0.720037	0.252743	0.0797567	0.160363	0.271026	0.189529	0.192128	-0.0751573	0.607779	-0.483376	0.000434367	-0.457159	0.000959115	-0.335616	0.0183988	0.779735	4.06107e-11	0.47154	0.000625977	0.338644	0.0173076	-0.501065	0.000245319
PRRX1	darkgreen	0.559566	2.91616e-05	-0.430673	0.00200821	0.823198	3.88575e-13	-0.502837	0.000231272	-0.630126	1.2247e-06	0.421283	0.00257382	0.432567	0.00190852	-0.281643	0.0499378	-0.44921	0.00120476	0.26178	0.0692197	0.270066	0.0605593	-0.14586	0.317298	0.365163	0.00988227	0.743586	9.31935e-10	0.56105	2.7482e-05	-0.847491	1.60016e-14	-0.211361	0.14488	-0.452654	0.00109217	0.557498	3.16607e-05
USP3-AS1	darkgreen	0.175555	0.227603	-0.277724	0.0533499	0.476714	0.000534426	-0.261572	0.0694488	-0.457397	0.000952529	0.0789234	0.589856	0.0297011	0.839459	0.1212	0.406786	-0.249557	0.0837592	-0.012398	0.93262	-0.0137432	0.925329	-0.0708929	0.628351	0.489403	0.000358781	0.814316	1.10756e-12	0.101042	0.489687	-0.818219	7.03942e-13	-0.571338	1.80715e-05	-0.675937	9.85253e-08	0.213554	0.140658
RBBP6	darkgreen	0.178288	0.220331	-0.587254	9.18305e-06	0.659114	2.61301e-07	-0.229922	0.111997	-0.48271	0.000443547	0.207874	0.151782	0.11819	0.418623	0.0165585	0.91009	-0.383261	0.00656334	0.0881441	0.547005	-0.0567522	0.698517	0.0982848	0.501671	0.534062	7.74502e-05	0.801949	4.3538e-12	0.29821	0.037416	-0.81724	7.89404e-13	-0.473134	0.000596373	-0.488818	0.000365551	0.387736	0.00591094
ZNF682	darkgreen	0.247408	0.0865455	-0.375866	0.00777908	0.618039	2.22789e-06	-0.492744	0.000322197	-0.535045	7.46962e-05	0.453005	0.00108124	0.401382	0.0042576	-0.163887	0.260494	-0.414107	0.00309677	0.227681	0.115633	0.108991	0.45599	-0.0594048	0.685142	0.383408	0.00654098	0.605539	4.03122e-06	0.557192	3.20465e-05	-0.826362	2.63845e-13	-0.298342	0.0373278	-0.283433	0.0484395	0.673926	1.11073e-07
TRAPPC13	darkgreen	0.331319	0.0200468	-0.279243	0.0520056	0.613354	2.79083e-06	-0.410275	0.00341272	-0.561147	2.73752e-05	0.192846	0.184318	0.301548	0.0352363	-0.23653	0.101781	-0.347513	0.0144219	0.0491983	0.737096	-0.0216925	0.882386	0.164537	0.258582	0.308952	0.0307737	0.655207	3.24897e-07	0.433073	0.00188264	-0.859482	2.68318e-15	-0.378807	0.00727406	-0.308254	0.0311732	0.583636	1.07446e-05
MCM9	darkgreen	0.0797285	0.586056	-0.280167	0.0512015	0.416278	0.0029295	-0.142477	0.328772	-0.390942	0.00547907	-0.0425245	0.771726	0.051131	0.72716	-0.129439	0.375392	-0.255321	0.0766294	-0.0603077	0.68061	-0.144978	0.320267	0.0651703	0.6564	0.538866	6.48223e-05	0.792037	1.21907e-11	0.102922	0.481604	-0.818094	7.14299e-13	-0.531805	8.4128e-05	-0.711725	9.86676e-09	0.149121	0.306483
FXYD3	darkgreen	-0.381537	0.00683089	0.388751	0.00577114	-0.63946	7.57946e-07	0.365223	0.00986931	0.440899	0.0015203	-0.322801	0.0236844	-0.15678	0.282017	0.0501605	0.732144	0.298281	0.0373686	0.0853232	0.559955	0.0481311	0.742601	-0.0132415	0.928047	-0.4803	0.000478258	-0.741082	1.13577e-09	-0.345562	0.0150187	0.891895	8.19328e-18	0.457159	0.000959115	0.67134	1.29413e-07	-0.383186	0.0065749
TECPR1	darkgreen	-0.44767	0.00125838	0.295815	0.0390476	-0.675014	1.04108e-07	0.467988	0.00069677	0.476501	0.000537952	-0.352575	0.0129671	-0.337267	0.0177967	0.214409	0.139038	0.294385	0.0400494	-0.053218	0.71648	-0.0191544	0.896067	-0.0307121	0.83407	-0.400498	0.00435089	-0.647529	4.94045e-07	-0.473077	0.00059742	0.913526	5.50834e-20	0.371514	0.00858202	0.473897	0.000582667	-0.543635	5.41767e-05
BICD1	darkgreen	0.272551	0.0581394	-0.474017	0.000580529	0.818514	6.79885e-13	-0.322301	0.0239141	-0.606029	3.94052e-06	0.105435	0.470907	0.238429	0.0989825	-0.20123	0.165601	-0.417885	0.00281085	0.160199	0.271521	0.100913	0.490244	-0.0126948	0.931011	0.473868	0.000583178	0.840464	4.25059e-14	0.380131	0.00705604	-0.854479	5.76316e-15	-0.348468	0.0141373	-0.548867	4.43588e-05	0.364173	0.0100994
UBQLN2	darkgreen	0.247104	0.0869465	-0.391381	0.00542221	0.619931	2.03211e-06	-0.330089	0.0205411	-0.504147	0.00022136	0.109836	0.452484	0.159606	0.273322	-0.00575148	0.968714	-0.310919	0.0296707	-0.031347	0.83069	0.0620008	0.672143	0.0209769	0.88624	0.381849	0.00678189	0.825032	3.10763e-13	0.261211	0.0698483	-0.871065	4.0602e-16	-0.428461	0.00213046	-0.529846	9.03451e-05	0.334922	0.018657
ECHDC2	darkgreen	-0.353583	0.0126928	-0.00760531	0.958637	-0.498367	0.000268197	0.450721	0.00115415	0.38573	0.00619608	-0.227565	0.115824	-0.177573	0.222217	0.102916	0.481629	0.232629	0.107722	0.0428691	0.769926	0.0429042	0.769743	-0.177159	0.223317	-0.316716	0.0266095	-0.597702	5.77265e-06	-0.251534	0.0812573	0.760746	2.25517e-10	0.44781	0.00125342	0.560645	2.7932e-05	-0.307207	0.0317808
NDUFB6	darkgreen	0.162842	0.263587	-0.54368	5.40842e-05	0.705714	1.48696e-08	-0.29134	0.0422524	-0.574827	1.5626e-05	0.0761164	0.603193	0.323924	0.0231753	-0.28548	0.0467714	-0.469258	0.000670673	0.0874892	0.549998	-0.0416452	0.776323	0.133317	0.361129	0.551779	3.96291e-05	0.779452	4.17153e-11	0.366409	0.00961461	-0.866564	8.63614e-16	-0.417153	0.00286433	-0.377251	0.00753762	0.486473	0.000393903
IGF2BP3	darkgreen	0.454632	0.00103185	-0.476324	0.000540882	0.801579	4.52888e-12	-0.481319	0.000463291	-0.557201	3.20353e-05	0.199351	0.169671	0.334936	0.0186517	-0.332566	0.0195561	-0.401348	0.00426122	0.269853	0.0607706	0.273855	0.0569	-0.182399	0.209702	0.346889	0.0146107	0.740585	1.18092e-09	0.510991	0.000175574	-0.811734	1.48605e-12	-0.196105	0.176872	-0.518407	0.000135829	0.467229	0.000712799
LINC00960	darkgreen	0.243869	0.0912929	-0.172837	0.234995	0.373407	0.00822436	-0.177965	0.221183	-0.438243	0.00163562	0.0525277	0.720007	-0.0200169	0.891414	-0.0300843	0.837416	-0.290169	0.0431258	0.0468789	0.749077	0.0253881	0.862528	0.0557281	0.703707	0.452469	0.00109797	0.78921	1.61874e-11	0.0666501	0.6491	-0.823217	3.877e-13	-0.54234	5.68963e-05	-0.526851	0.000100666	0.195104	0.179136
CSTF2	darkgreen	0.130906	0.369957	-0.440561	0.00153453	0.684524	5.84222e-08	-0.376698	0.00763323	-0.487642	0.000379529	0.261033	0.0700457	0.237337	0.100585	-0.113129	0.438962	-0.323061	0.0235655	0.0422566	0.773125	-0.0648288	0.658089	0.10322	0.480325	0.553089	3.76561e-05	0.672703	1.19422e-07	0.410616	0.00338349	-0.773871	7.01765e-11	-0.403289	0.00406242	-0.408249	0.00359097	0.49773	0.000273873
PRDX5	darkgreen	-0.202628	0.162621	0.159744	0.272903	-0.379419	0.00717257	0.375305	0.00787886	0.324811	0.0227795	-0.409535	0.00347696	-0.328804	0.0210684	0.0320668	0.826861	0.234189	0.105315	0.137588	0.345811	0.170462	0.24159	-0.110022	0.451715	-0.323971	0.023154	-0.377321	0.00752555	-0.428505	0.00212793	0.75257	4.49766e-10	0.421186	0.00258031	0.258287	0.0731533	-0.602715	4.59308e-06
UBE2I	darkgreen	-0.0185478	0.899341	0.384066	0.0064416	-0.376551	0.00765882	0.0799594	0.584968	0.299716	0.0364191	0.0379566	0.795689	0.0967003	0.508625	-0.0401231	0.784299	0.205119	0.157407	0.280147	0.0512192	0.275025	0.0558073	-0.19865	0.171207	-0.638535	7.95397e-07	-0.771175	8.97515e-11	0.0270882	0.85342	0.844867	2.3175e-14	0.715433	7.62172e-09	0.682294	6.70241e-08	-0.12057	0.409248
SDF4	darkgreen	-0.317677	0.0261284	0.250982	0.0819505	-0.485486	0.000406407	0.206947	0.153657	0.466919	0.000719438	-0.180156	0.215457	-0.241472	0.0946222	0.101937	0.485831	0.289286	0.0437936	-0.0346483	0.813163	0.125395	0.390616	-0.128197	0.38003	-0.340498	0.0166669	-0.64669	5.16821e-07	-0.321196	0.0244283	0.889698	1.28235e-17	0.47623	0.000542447	0.366531	0.00958861	-0.490014	0.000351819
TTK	darkgreen	0.306709	0.0320734	-0.502108	0.000236958	0.80365	3.62714e-12	-0.344519	0.0153464	-0.612696	2.87962e-06	0.225692	0.118936	0.390311	0.00556188	-0.199183	0.170038	-0.454308	0.00104153	0.224245	0.121384	0.134456	0.357006	-0.253238	0.079149	0.345502	0.0150375	0.771512	8.70536e-11	0.500304	0.000251583	-0.859173	2.81562e-15	-0.257972	0.0735163	-0.448566	0.00122694	0.473969	0.000581375
PAPPA	darkgreen	0.187904	0.196038	-0.559022	2.9801e-05	0.795023	8.99283e-12	-0.330141	0.0205199	-0.6078	3.62791e-06	0.242635	0.0929959	0.365447	0.00982074	-0.129106	0.376631	-0.477514	0.0005214	0.0611066	0.67661	0.00164906	0.991028	-0.0468437	0.749259	0.532807	8.11022e-05	0.743346	9.49882e-10	0.44922	0.00120441	-0.793488	1.05215e-11	-0.323035	0.0235773	-0.391989	0.00534412	0.467078	0.00071603
TMEM241	darkgreen	-0.325728	0.0223764	0.338581	0.0173296	-0.546881	4.78749e-05	0.162589	0.264341	0.250916	0.0820336	-0.0937758	0.521588	0.0827792	0.571756	-0.0124035	0.93259	0.14818	0.309579	0.197642	0.173435	0.136148	0.350932	-0.345847	0.0149303	-0.302039	0.034925	-0.687389	4.88807e-08	-0.141067	0.333632	0.767021	1.30286e-10	0.468207	0.000692215	0.557053	3.22229e-05	-0.205461	0.1567
NUDCD3	darkgreen	-0.346183	0.0148266	0.103668	0.478414	-0.399544	0.00445353	0.186559	0.199316	0.314271	0.0278666	-0.215433	0.137115	-0.0454058	0.756716	0.0176521	0.904179	0.190925	0.188812	0.174827	0.229568	0.149977	0.303683	-0.167472	0.250068	-0.3979	0.00463536	-0.596059	6.21674e-06	-0.187041	0.198136	0.783656	2.79095e-11	0.477812	0.000516636	0.591483	7.62503e-06	-0.263434	0.067416
PADI2	darkgreen	-0.252346	0.0802468	0.327529	0.0216023	-0.515748	0.000149026	0.168007	0.248537	0.364569	0.0100122	-0.112367	0.442071	0.00772684	0.957977	0.0451595	0.757996	0.216758	0.134658	0.0646942	0.658756	0.0602792	0.680753	-0.146972	0.313584	-0.56849	2.03239e-05	-0.79939	5.71067e-12	-0.125057	0.391905	0.857522	3.63265e-15	0.534157	7.71808e-05	0.689482	4.28556e-08	-0.154169	0.290209
ING3	darkgreen	0.18526	0.202518	-0.443757	0.00140434	0.66893	1.49022e-07	-0.428018	0.00215571	-0.498115	0.000270424	0.169705	0.243718	0.158177	0.277697	-0.144988	0.320231	-0.300297	0.0360406	0.0625769	0.669271	-0.00350581	0.980927	0.14063	0.335148	0.382102	0.00674226	0.704684	1.59359e-08	0.400475	0.0043533	-0.841908	3.4906e-14	-0.42126	0.00257537	-0.443482	0.00141512	0.526511	0.000101905
CTDSP1	darkgreen	-0.309886	0.0302457	0.207482	0.152574	-0.504948	0.000215494	0.389242	0.00570453	0.490448	0.000346957	-0.205221	0.157195	-0.213706	0.14037	0.215976	0.136104	0.265534	0.0651816	0.0394311	0.787932	0.0103564	0.943696	-0.230515	0.111049	-0.553992	3.63492e-05	-0.637928	8.2094e-07	-0.310652	0.0298186	0.877806	1.24181e-16	0.462809	0.000812883	0.413338	0.00315805	-0.471068	0.000635013
EIF4E3	darkgreen	0.412627	0.00321565	-0.162904	0.263404	0.521202	0.00012311	-0.614798	2.60459e-06	-0.492817	0.000321446	0.311145	0.029546	0.421318	0.00257148	-0.0954523	0.514137	-0.282632	0.0491058	0.057089	0.696814	0.184465	0.204497	-0.0667976	0.648374	0.181987	0.210751	0.478206	0.000510375	0.507119	0.000200288	-0.787722	1.87616e-11	-0.231669	0.109224	-0.1702	0.242324	0.658612	2.68761e-07
CEP97	darkgreen	0.39025	0.00556996	-0.362078	0.0105729	0.655508	3.19536e-07	-0.18748	0.197067	-0.591684	7.55724e-06	0.26287	0.0680267	0.349229	0.0139139	-0.1032	0.480412	-0.464681	0.000769057	0.2082	0.151126	0.0965478	0.509297	-0.225331	0.119543	0.141995	0.330431	0.594106	6.78516e-06	0.470918	0.000637887	-0.747576	6.76887e-10	-0.231659	0.109238	-0.179001	0.218463	0.584523	1.03406e-05
RP4-614O4.12	darkgreen	0.109357	0.454468	-0.549452	4.33682e-05	0.633174	1.0489e-06	-0.296309	0.0387062	-0.485408	0.000407416	0.16892	0.245936	0.132665	0.363505	-0.109814	0.452576	-0.372718	0.00835316	0.0482076	0.742206	-0.00213894	0.988362	0.0286246	0.845206	0.68978	4.20571e-08	0.799498	5.64622e-12	0.291075	0.0424484	-0.820209	5.56335e-13	-0.441446	0.00149743	-0.554669	3.53966e-05	0.368808	0.00911683
LOC100287497	darkgreen	0.424335	0.00237619	-0.41604	0.00294738	0.709657	1.13752e-08	-0.154763	0.288333	-0.596056	6.21737e-06	0.0951085	0.515661	0.20774	0.152052	-0.212511	0.142654	-0.414605	0.00305767	0.141506	0.332116	0.0632223	0.666058	-0.0837691	0.56715	0.39323	0.00518801	0.794721	9.27607e-12	0.29832	0.0373424	-0.807912	2.27787e-12	-0.315765	0.0270925	-0.478526	0.000505335	0.331098	0.0201352
ZBED5-AS1	darkgreen	-0.343909	0.0155407	0.373324	0.00823979	-0.653155	3.63841e-07	0.302397	0.0346987	0.410853	0.00336332	-0.182653	0.209058	-0.161442	0.267773	0.0597944	0.683185	0.270808	0.0598287	0.00958763	0.94787	-0.0705825	0.62986	0.133633	0.359982	-0.430055	0.0020417	-0.718346	6.20472e-09	-0.28379	0.0481451	0.835898	7.82204e-14	0.386936	0.00602334	0.621285	1.90194e-06	-0.28162	0.0499579
NXN	darkgreen	-0.334256	0.0189075	0.152642	0.295072	-0.436681	0.00170702	0.42614	0.00226575	0.414427	0.00307162	-0.314469	0.0277631	-0.128063	0.380532	0.0493075	0.736534	0.16919	0.245172	0.12057	0.409249	0.114243	0.434439	-0.0746481	0.61022	-0.463398	0.000798853	-0.570992	1.83323e-05	-0.288877	0.0441062	0.798957	5.97668e-12	0.478635	0.000503636	0.514681	0.000154639	-0.446158	0.00131307
DLEU2	darkgreen	0.349933	0.01371	-0.539692	6.28511e-05	0.846804	1.76439e-14	-0.498062	0.000270901	-0.647769	4.87707e-07	0.253596	0.0787111	0.395205	0.00494766	-0.281437	0.0501128	-0.415008	0.00302639	0.203826	0.160097	0.191382	0.187737	-0.0939378	0.520866	0.366022	0.00969711	0.760687	2.26663e-10	0.53747	6.8283e-05	-0.842227	3.34127e-14	-0.225905	0.118579	-0.427968	0.00215856	0.525725	0.000104816
ROR1	darkgreen	0.355947	0.0120693	-0.50812	0.000193615	0.792042	1.21848e-11	-0.335096	0.0185919	-0.53489	7.51261e-05	0.263658	0.0671752	0.461819	0.000836966	-0.29753	0.0378733	-0.405436	0.00385204	0.0925553	0.527046	-0.0299833	0.837954	0.0511378	0.727125	0.402466	0.00414568	0.756266	3.30281e-10	0.482565	0.00044558	-0.851411	9.0806e-15	-0.30929	0.0305817	-0.440765	0.00152592	0.477483	0.000521913
FAM134C	darkgreen	-0.166485	0.252909	0.107536	0.462063	-0.32452	0.0229088	0.314579	0.0277055	0.416278	0.00292945	-0.0337757	0.817787	-0.109832	0.452499	0.0763092	0.602272	0.240525	0.0959634	0.212555	0.142569	0.176986	0.223775	-0.0479965	0.743297	-0.553333	3.72985e-05	-0.634457	9.82163e-07	-0.170616	0.241156	0.833354	1.08994e-13	0.59774	5.76292e-06	0.595846	6.27652e-06	-0.329544	0.0207632
MFAP3	darkgreen	0.264258	0.0665319	-0.481753	0.00045705	0.76262	1.91767e-10	-0.338953	0.0171994	-0.61637	2.41509e-06	0.179749	0.216512	0.186308	0.199931	-0.0622391	0.670954	-0.366617	0.00957039	-0.0636938	0.663716	-0.0724005	0.621045	0.0323886	0.825151	0.50115	0.000244629	0.840036	4.50388e-14	0.336582	0.0180446	-0.893916	5.38075e-18	-0.459946	0.000884272	-0.517433	0.000140533	0.390256	0.00556916
S100A2	darkgreen	-0.414757	0.00304583	0.0312113	0.831412	-0.634386	9.85782e-07	0.423917	0.00240244	0.473559	0.000588701	-0.233715	0.106041	-0.281709	0.049882	0.242154	0.0936654	0.359776	0.0111147	-0.0823388	0.57381	-0.111161	0.447017	0.0335744	0.818855	-0.597902	5.72079e-06	-0.668504	1.52772e-07	-0.330132	0.0205234	0.7795	4.15261e-11	0.352959	0.0128619	0.575967	1.48957e-05	-0.310409	0.0299533
DLEU2	darkgreen	0.319179	0.0253912	-0.576601	1.45033e-05	0.869888	4.95938e-16	-0.370319	0.0088147	-0.683749	6.12859e-08	0.296902	0.0382996	0.5052	0.000213673	-0.282067	0.0495801	-0.472453	0.000608875	0.224265	0.12135	0.105045	0.472556	-0.215636	0.136736	0.497446	0.000276437	0.742277	1.03378e-09	0.563959	2.44453e-05	-0.817839	7.35994e-13	-0.197929	0.172798	-0.401043	0.00429319	0.521009	0.000123956
THAP2	darkgreen	0.328884	0.0210352	-0.411811	0.00328283	0.742615	1.0065e-09	-0.38597	0.00616133	-0.595787	6.29305e-06	0.229127	0.113277	0.320333	0.0248366	-0.163123	0.262754	-0.431148	0.00198277	0.0978293	0.503666	0.0704312	0.630595	-0.0328474	0.822713	0.368801	0.00911813	0.784576	2.55304e-11	0.426877	0.00222201	-0.878014	1.19591e-16	-0.365518	0.00980526	-0.494572	0.000303652	0.472136	0.000614761
TMEM208	darkgreen	-0.246513	0.0877273	0.356337	0.011969	-0.4796	0.000488775	0.158198	0.277631	0.390725	0.00550737	-0.191967	0.186365	-0.0887607	0.544193	0.0465804	0.750623	0.285775	0.0465351	0.191513	0.187428	0.22457	0.120831	-0.157869	0.278645	-0.506699	0.000203154	-0.692153	3.61743e-08	-0.210603	0.146359	0.891471	8.93931e-18	0.565601	2.28699e-05	0.558276	3.06988e-05	-0.339394	0.0170459
UROD	darkgreen	-0.282915	0.04887	0.363635	0.0102193	-0.583099	1.0996e-05	0.210041	0.147464	0.441073	0.00151297	-0.232704	0.107605	-0.161678	0.267063	0.00784776	0.95732	0.365389	0.00983316	0.0614315	0.674985	0.075608	0.605622	0.0424049	0.772351	-0.510324	0.000179625	-0.726448	3.45396e-09	-0.300775	0.0357314	0.890483	1.09393e-17	0.473127	0.000596504	0.533638	7.86672e-05	-0.390905	0.00548386
KDELR1	darkgreen	-0.292201	0.0416195	0.232885	0.107324	-0.516407	0.00014565	0.438972	0.00160321	0.330931	0.0202017	-0.295003	0.0396133	-0.147512	0.311788	0.0350407	0.811085	0.207567	0.152401	0.137094	0.347561	0.117738	0.420416	-0.154246	0.289964	-0.406229	0.00377687	-0.638037	8.16287e-07	-0.286547	0.0459207	0.833236	1.10665e-13	0.506797	0.000202486	0.626514	1.46844e-06	-0.378097	0.00739335
GNA11	darkgreen	-0.485053	0.000412008	0.361019	0.0108192	-0.643776	6.03785e-07	0.244956	0.0898137	0.444781	0.00136476	-0.325386	0.0225261	-0.285453	0.046793	0.185901	0.200933	0.308889	0.0308096	-0.166788	0.252035	-0.0883028	0.54628	-0.0565443	0.69957	-0.310225	0.0300563	-0.63103	1.16991e-06	-0.389071	0.00572773	0.839953	4.5551e-14	0.296319	0.0386994	0.357368	0.011707	-0.462444	0.000821691
WISP1	darkgreen	0.336971	0.0179034	-0.555827	3.38215e-05	0.777037	5.23419e-11	-0.29519	0.0394828	-0.590282	8.04066e-06	0.366312	0.00963521	0.332447	0.0196027	-0.163953	0.260301	-0.443406	0.00141813	0.287604	0.0450898	0.138491	0.342622	-0.17103	0.240001	0.398761	0.00453931	0.769264	1.0664e-10	0.486313	0.000395901	-0.792241	1.19424e-11	-0.243772	0.0914263	-0.501995	0.000237855	0.450704	0.0011547
MAP3K3	darkgreen	-0.417266	0.00285603	0.187363	0.197352	-0.565848	2.26416e-05	0.314998	0.0274876	0.462526	0.000819713	-0.229815	0.112169	-0.198728	0.171035	0.225465	0.119317	0.264879	0.0658725	-0.0675768	0.644545	-0.0780125	0.59417	-0.155578	0.28577	-0.443976	0.00139578	-0.714931	7.89447e-09	-0.310468	0.0299207	0.892923	6.62228e-18	0.412539	0.00322278	0.526317	0.000102617	-0.381701	0.00680509
THEMIS	darkgreen	0.471656	0.00062379	-0.508774	0.000189364	0.871621	3.69141e-16	-0.521428	0.000122134	-0.707362	1.33017e-08	0.372867	0.00832511	0.46896	0.000676709	-0.320475	0.0247691	-0.536123	7.17808e-05	0.109331	0.454576	0.132678	0.363459	-0.0647496	0.658481	0.323859	0.0232043	0.721596	4.91717e-09	0.578461	1.34068e-05	-0.820013	5.69424e-13	-0.199141	0.170131	-0.34926	0.0139049	0.54191	5.78279e-05
SLC16A1	darkgreen	0.165903	0.254595	-0.496638	0.000283857	0.681167	7.1815e-08	-0.305392	0.032857	-0.54826	4.54081e-05	0.160057	0.271953	0.15491	0.28787	-0.0706373	0.629593	-0.34824	0.0142048	0.121267	0.406524	0.0667954	0.648385	-0.0517405	0.724036	0.512497	0.000166739	0.822208	4.37965e-13	0.319972	0.0250087	-0.845307	2.1791e-14	-0.368901	0.00909786	-0.547771	4.62681e-05	0.335186	0.0185584
IL22RA2	darkgreen	0.256979	0.0746701	-0.527932	9.68247e-05	0.729479	2.75936e-09	-0.0923168	0.528116	-0.537069	6.93078e-05	-0.0770209	0.598881	0.272047	0.0586239	-0.331597	0.0199366	-0.384696	0.00634773	0.189328	0.192608	0.058409	0.690152	-0.0349285	0.811679	0.255033	0.0769746	0.791634	1.26973e-11	0.322413	0.0238626	-0.751277	5.00439e-10	-0.239844	0.0969353	-0.427615	0.00217891	0.276958	0.0540381
GSS	darkgreen	-0.333545	0.019178	0.286625	0.0458586	-0.57831	1.34926e-05	0.310624	0.0298341	0.514999	0.000152947	-0.231032	0.110229	-0.353329	0.0127615	0.223761	0.12221	0.37331	0.00824237	-0.0130232	0.929231	0.0468344	0.749307	-0.108229	0.459165	-0.378479	0.00732883	-0.647969	4.82468e-07	-0.419285	0.00271095	0.892982	6.54191e-18	0.398763	0.00453908	0.378933	0.00725312	-0.51348	0.000161191
LARP6	darkgreen	-0.389042	0.00573162	0.379024	0.00723791	-0.742251	1.03583e-09	0.434474	0.00181263	0.57201	1.7575e-05	-0.277218	0.053804	-0.31406	0.0279774	0.265172	0.0655622	0.378992	0.00724325	-0.231868	0.108911	-0.14677	0.314258	0.116979	0.42344	-0.554312	3.58971e-05	-0.665052	1.86507e-07	-0.442926	0.00143722	0.817153	7.97528e-13	0.335522	0.0184336	0.425722	0.00229092	-0.541045	5.97416e-05
SND1	darkgreen	-0.309683	0.0303601	0.176281	0.225655	-0.531968	8.36281e-05	0.441452	0.00149719	0.419467	0.00269816	-0.340174	0.0167774	-0.222065	0.125142	0.0967573	0.508375	0.285448	0.0467971	0.090268	0.53735	0.0855749	0.558794	-0.0740609	0.61304	-0.530416	8.8493e-05	-0.648932	4.58026e-07	-0.334959	0.018643	0.871881	3.5303e-16	0.512352	0.000167572	0.625579	1.53847e-06	-0.41274	0.00320641
FAM193B	darkgreen	-0.204232	0.159249	-0.0132806	0.927835	-0.237489	0.10036	0.240138	0.096515	0.345878	0.0149207	-0.0320073	0.827178	-0.0715036	0.625387	0.0601601	0.68135	0.105139	0.472159	0.184963	0.203256	0.174896	0.229381	-0.307066	0.0318637	-0.461861	0.000835947	-0.571572	1.7897e-05	-0.0861674	0.556064	0.763118	1.83642e-10	0.531707	8.4428e-05	0.477549	0.000520839	-0.194809	0.179805
OS9	darkgreen	-0.256726	0.0749668	0.0532187	0.716477	-0.351965	0.0131353	0.364747	0.00997293	0.351843	0.0131692	-0.328699	0.021112	-0.174206	0.23125	-0.0402243	0.783768	0.252636	0.0798885	0.101304	0.488557	0.129747	0.374248	-0.104312	0.475671	-0.523813	0.000112223	-0.594619	6.63138e-06	-0.246263	0.0880599	0.793904	1.00847e-11	0.582661	1.12051e-05	0.597723	5.76729e-06	-0.375595	0.00782715
LINS	darkgreen	0.327155	0.0217615	-0.412625	0.00321576	0.703604	1.71315e-08	-0.237465	0.100396	-0.52033	0.000126959	0.181792	0.211247	0.31754	0.0261963	-0.265174	0.0655603	-0.313631	0.0282039	0.0394422	0.787874	-0.0392661	0.788799	-0.137079	0.347616	0.459906	0.00088532	0.754236	3.91604e-10	0.399195	0.00449157	-0.857259	3.78196e-15	-0.376988	0.00758288	-0.570637	1.86036e-05	0.428969	0.00210179
HYOU1	darkgreen	-0.14968	0.304651	0.350552	0.0135326	-0.480276	0.000478614	0.35351	0.0127124	0.241612	0.0944248	-0.194139	0.181338	-0.237111	0.100918	0.0245544	0.867001	0.239596	0.0972928	0.0388477	0.790999	0.0790397	0.589307	-0.164474	0.258767	-0.368502	0.00917905	-0.535961	7.22114e-05	-0.381793	0.00679062	0.753546	4.14768e-10	0.404086	0.00398317	0.41882	0.00274375	-0.492449	0.000325292
LOC101929240	darkgreen	-0.138017	0.344295	0.064348	0.660471	-0.190145	0.19066	0.154872	0.287989	0.205943	0.155709	-0.140828	0.334461	0.119396	0.413855	-0.18739	0.197285	0.11924	0.414473	0.297998	0.0375581	0.323544	0.0233463	-0.314954	0.0275105	-0.377351	0.00752039	-0.596888	5.98877e-06	0.0728284	0.618978	0.683303	6.29952e-08	0.677203	9.13168e-08	0.667348	1.6337e-07	-0.035014	0.811227
GPX1	darkgreen	-0.138858	0.341333	0.222477	0.124425	-0.300318	0.036027	0.187011	0.19821	0.336666	0.018014	-0.184929	0.203342	-0.0404025	0.782833	-0.0821744	0.574578	0.229849	0.112114	0.26912	0.0615015	0.314091	0.0279614	-0.187035	0.198152	-0.46756	0.00070576	-0.620778	1.94975e-06	-0.154129	0.290335	0.865153	1.08803e-15	0.657907	2.79595e-07	0.52937	9.19174e-05	-0.35342	0.0127369
SP100	darkgreen	0.521151	0.000123333	-0.528177	9.59703e-05	0.862513	1.66457e-15	-0.415013	0.00302599	-0.595757	6.3015e-06	0.189141	0.193055	0.384447	0.00638472	-0.343479	0.0156791	-0.436423	0.00171905	0.350272	0.0136127	0.292082	0.0417063	-0.251838	0.0808783	0.18634	0.199854	0.707085	1.35536e-08	0.55317	3.75379e-05	-0.733364	2.06041e-09	-0.070574	0.629901	-0.444427	0.00137831	0.467525	0.000706514
PACSIN2	darkgreen	-0.27409	0.0566792	0.128448	0.37909	-0.452542	0.00109568	0.332265	0.0196739	0.356847	0.0118387	-0.0831989	0.569801	-0.00663865	0.963891	0.0333537	0.820026	0.215248	0.137461	0.106284	0.467323	0.104053	0.476774	-0.15179	0.297806	-0.428617	0.0021216	-0.733934	1.97311e-09	-0.0968799	0.507835	0.786326	2.15228e-11	0.546083	4.93582e-05	0.759695	2.46807e-10	-0.116547	0.425168
DCLK1	darkgreen	0.248346	0.0853207	-0.437849	0.00165335	0.793402	1.06151e-11	-0.363657	0.0102144	-0.521891	0.000120152	0.140787	0.334604	0.354834	0.0123596	-0.244719	0.0901346	-0.409497	0.00348022	0.0547999	0.708421	0.0138596	0.924698	-0.0216922	0.882388	0.538499	6.57161e-05	0.784219	2.643e-11	0.41824	0.00278521	-0.827752	2.22003e-13	-0.376325	0.00769826	-0.554478	3.5664e-05	0.407949	0.00361809
ZNF430	darkgreen	0.437065	0.00168922	-0.527496	9.83587e-05	0.787822	1.85759e-11	-0.342254	0.0160788	-0.605496	4.03933e-06	0.272096	0.0585763	0.376331	0.00769719	-0.246976	0.087115	-0.437472	0.00167052	0.050895	0.728371	0.0142576	0.922542	0.0103018	0.943992	0.279729	0.0515816	0.764905	1.57056e-10	0.481688	0.000457986	-0.859784	2.55998e-15	-0.281247	0.0502747	-0.382237	0.00672116	0.472943	0.000599857
FAM83D	darkgreen	0.320664	0.0246792	-0.456454	0.000978931	0.784478	2.57749e-11	-0.279238	0.0520105	-0.624387	1.63231e-06	0.126513	0.38637	0.332425	0.0196113	-0.258797	0.0725683	-0.463049	0.000807141	0.177041	0.22363	0.129448	0.375358	-0.127246	0.383602	0.495736	0.000292348	0.79775	6.78137e-12	0.417617	0.00283032	-0.806527	2.65297e-12	-0.222346	0.124652	-0.486682	0.000391293	0.360135	0.0110288
SHC1	darkgreen	-0.0939919	0.520625	0.333413	0.0192287	-0.36	0.0110609	0.110405	0.450131	0.254059	0.0781482	-0.0680425	0.64226	0.183007	0.208161	-0.161953	0.266238	0.129265	0.376038	0.262103	0.0688648	0.32347	0.0233797	-0.260203	0.0709742	-0.357174	0.0117559	-0.711839	9.78919e-09	0.0163612	0.911157	0.747006	7.08769e-10	0.670027	1.39777e-07	0.730985	2.46546e-09	-0.0881966	0.546765
ZNF431	darkgreen	0.431631	0.00195722	-0.400291	0.00437293	0.715879	7.38639e-09	-0.366177	0.00966386	-0.557743	3.1354e-05	0.234147	0.105379	0.262307	0.0686406	-0.202052	0.163845	-0.39327	0.00518303	0.0304303	0.835572	0.00952531	0.948208	0.0404483	0.782593	0.187457	0.197124	0.680254	7.59244e-08	0.483167	0.000437238	-0.822625	4.16473e-13	-0.305071	0.0330507	-0.41281	0.00320068	0.558214	3.07734e-05
RP11-199F11.2	darkgreen	0.429935	0.0020483	-0.45802	0.000935415	0.756857	3.14213e-10	-0.447817	0.00125318	-0.608196	3.56129e-06	0.25181	0.0809132	0.292157	0.0416513	-0.196755	0.175411	-0.400224	0.00438016	0.192675	0.184716	0.17294	0.234711	-0.0630325	0.667003	0.255361	0.0765826	0.747609	6.75046e-10	0.487589	0.000380168	-0.835069	8.72061e-14	-0.264024	0.066782	-0.451886	0.00111641	0.495035	0.000299109
NISCH	darkgreen	-0.366641	0.00956537	0.0288598	0.84395	-0.466869	0.000720519	0.374694	0.00798861	0.36965	0.0089474	-0.195099	0.179146	-0.117459	0.421528	0.0608311	0.677988	0.187687	0.196564	0.1281	0.380394	0.0972471	0.50622	-0.184405	0.204647	-0.230356	0.111303	-0.594325	6.71931e-06	-0.220226	0.12838	0.773867	7.02024e-11	0.441511	0.00149478	0.518217	0.000136734	-0.30672	0.0320669
PSAP	darkgreen	-0.04998	0.733073	0.196347	0.176326	-0.209483	0.148568	0.1144	0.433802	0.310011	0.0301756	-0.129348	0.37573	-0.106443	0.466652	-0.141889	0.330794	0.168864	0.246096	0.226891	0.116937	0.352984	0.0128552	-0.239938	0.0968014	-0.31955	0.0252117	-0.486128	0.000398236	-0.162664	0.264118	0.75255	4.50512e-10	0.604477	4.23453e-06	0.261283	0.0697691	-0.418364	0.00277631
CCDC85C	darkgreen	-0.296905	0.0382976	0.531806	8.41239e-05	-0.632828	1.0676e-06	-0.0683515	0.640747	0.470944	0.000637393	-0.117857	0.419943	0.00786406	0.957231	-0.04599	0.753684	0.336637	0.0180246	0.0305707	0.834824	0.167805	0.249113	-0.171135	0.239709	-0.428628	0.00212096	-0.775868	5.83585e-11	-0.203273	0.161258	0.839029	5.1589e-14	0.48915	0.000361687	0.472578	0.000606569	-0.312229	0.0289547
DDR1	darkgreen	-0.38639	0.00610103	0.135332	0.353853	-0.531664	8.45608e-05	0.407537	0.0036556	0.370607	0.00875823	-0.254794	0.0772617	-0.158628	0.27631	0.073212	0.617127	0.219122	0.130354	0.0674576	0.64513	0.0605921	0.679185	-0.126175	0.387653	-0.247208	0.0868093	-0.601739	4.8036e-06	-0.321897	0.0241009	0.820849	5.15507e-13	0.425769	0.00228805	0.550592	4.14975e-05	-0.410771	0.00337029
SCN3A	darkgreen	0.588911	8.54054e-06	-0.476044	0.000545569	0.872737	3.04535e-16	-0.541764	5.81455e-05	-0.586546	9.47124e-06	0.411313	0.0033245	0.536702	7.0258e-05	-0.301441	0.0353045	-0.442974	0.00143531	0.169927	0.24309	0.178225	0.220498	-0.2278	0.115439	0.182204	0.210197	0.630598	1.19579e-06	0.656792	2.97537e-07	-0.80303	3.87778e-12	-0.106703	0.465557	-0.398422	0.00457698	0.586707	9.40497e-06
AQP1	darkgreen	-0.129749	0.374237	0.377733	0.00745514	-0.430379	0.00202407	0.25559	0.0763092	0.336265	0.0181599	-0.190143	0.190665	-0.0710459	0.627608	-0.0232244	0.874146	0.134328	0.357467	0.17125	0.239387	0.248735	0.0848163	-0.384557	0.00636831	-0.392918	0.00522682	-0.631909	1.1188e-06	-0.21564	0.136729	0.874261	2.33518e-16	0.601735	4.80453e-06	0.399171	0.00449421	-0.438233	0.00163607
MLXIP	darkgreen	-0.398881	0.00452606	0.193584	0.182613	-0.504572	0.000218229	0.264641	0.0661248	0.312018	0.029069	-0.215248	0.13746	-0.0875002	0.549948	0.0285564	0.84557	0.19002	0.190957	0.111134	0.447126	0.110382	0.450226	-0.0583602	0.690398	-0.183387	0.207202	-0.592224	7.37838e-06	-0.260584	0.0705467	0.765719	1.46194e-10	0.411362	0.00332037	0.61144	3.05663e-06	-0.301179	0.0354717
CRELD2	darkgreen	-0.329183	0.0209115	0.425538	0.0023021	-0.600664	5.04574e-06	0.254024	0.0781909	0.373304	0.00824353	-0.227515	0.115906	-0.100507	0.492001	-0.0616928	0.67368	0.353781	0.0126395	0.152209	0.296459	0.1216	0.405229	-0.0724559	0.620777	-0.48276	0.000442852	-0.793651	1.03485e-11	-0.224729	0.12056	0.873575	2.63269e-16	0.51815	0.000137055	0.713722	8.58997e-09	-0.238508	0.0988678
RITA1	darkgreen	-0.112504	0.441512	0.432432	0.00191549	-0.540997	5.985e-05	0.123513	0.397823	0.436749	0.00170384	0.0806011	0.58195	-0.0907526	0.535159	0.204639	0.158401	0.241076	0.0951808	0.054159	0.711682	0.120048	0.411295	-0.0430083	0.7692	-0.451292	0.0011355	-0.667838	1.58793e-07	-0.22278	0.1239	0.818774	6.59353e-13	0.454883	0.0010244	0.452585	0.00109433	-0.334482	0.0188222
ERCC1	darkgreen	-0.29959	0.0365015	0.402865	0.00410513	-0.597309	5.87606e-06	0.105006	0.472723	0.458491	0.00092267	-0.10883	0.456659	-0.0506528	0.729615	0.125888	0.388741	0.317134	0.0263992	0.171213	0.23949	0.149502	0.305234	-0.16618	0.253794	-0.549922	4.25878e-05	-0.759961	2.41258e-10	-0.218939	0.130684	0.897387	2.56085e-18	0.525967	0.000103913	0.583473	1.08203e-05	-0.321512	0.0242803
LOC158402	darkgreen	0.262476	0.0684565	-0.476956	0.000530467	0.66957	1.43563e-07	-0.32734	0.0216827	-0.63937	7.61516e-07	0.439526	0.00157897	0.403832	0.00400823	-0.157291	0.280432	-0.504619	0.000217882	0.125783	0.389139	-0.00896041	0.951276	-0.0884835	0.545456	0.514347	0.000156434	0.681809	6.90476e-08	0.498011	0.000271351	-0.829785	1.72013e-13	-0.317593	0.0261698	-0.391842	0.00536285	0.575625	1.51114e-05
SEMA3F	darkgreen	-0.410995	0.0033513	-0.0273469	0.852036	-0.492479	0.000324971	0.443258	0.00142399	0.287317	0.0453143	-0.269857	0.0607672	-0.0968493	0.50797	0.0892227	0.542091	0.0528479	0.71837	0.0321824	0.826247	-0.0150275	0.918374	-0.26343	0.0674211	-0.216753	0.134667	-0.429366	0.00207967	-0.277086	0.0539225	0.666594	1.70655e-07	0.320913	0.0245617	0.433911	0.0018405	-0.342603	0.0159642
TAGLN2	darkgreen	-0.293084	0.0409784	-0.0459911	0.753678	-0.243957	0.0911727	0.343022	0.0158271	0.424073	0.00239262	-0.164186	0.259614	-0.430495	0.00201779	0.220137	0.128538	0.32755	0.0215937	-0.0176931	0.903957	0.0238557	0.870753	-0.151406	0.299046	-0.247495	0.0864321	-0.401064	0.00429097	-0.330797	0.0202555	0.732016	2.28138e-09	0.36455	0.0100163	0.120027	0.411376	-0.542519	5.65137e-05
SIX2	darkgreen	-0.271607	0.0590491	0.276788	0.0541917	-0.585433	9.94075e-06	0.474269	0.000576082	0.475389	0.000556648	-0.358767	0.0113597	-0.30789	0.0313838	0.292106	0.0416888	0.241883	0.094044	-0.0989777	0.498646	-0.0159114	0.91359	-0.096787	0.508244	-0.607957	3.60142e-06	-0.538503	6.57068e-05	-0.446393	0.00130445	0.819615	5.96981e-13	0.3728	0.00833771	0.358457	0.011436	-0.616978	2.34524e-06
PGAP2	darkgreen	-0.361656	0.0106705	0.371233	0.00863637	-0.640276	7.26252e-07	0.125976	0.388405	0.52267	0.000116879	-0.117255	0.42234	-0.170377	0.241826	0.0513232	0.726175	0.340437	0.0166876	-0.0313662	0.830588	-0.00967873	0.947375	0.0526986	0.719133	-0.385514	0.0062275	-0.78881	1.68454e-11	-0.26395	0.0668617	0.898215	2.13714e-18	0.413464	0.00314794	0.48105	0.0004672	-0.307266	0.0317462
BPTF	darkgreen	0.220262	0.128316	-0.549941	4.25579e-05	0.626472	1.47148e-06	-0.15102	0.300292	-0.497157	0.000279067	-0.0203607	0.889561	0.0507693	0.729016	-0.126829	0.385175	-0.328508	0.0211912	-0.0364857	0.803446	-0.0388422	0.791028	0.150581	0.301718	0.425429	0.00230868	0.882028	5.70369e-17	0.212152	0.143346	-0.875461	1.88988e-16	-0.46859	0.000684298	-0.531999	8.35333e-05	0.277588	0.0534718
PIK3R2	darkgreen	-0.139036	0.34071	0.364144	0.010106	-0.637265	8.49677e-07	0.307477	0.0316233	0.424315	0.00237747	-0.0316508	0.829074	-0.185048	0.203045	0.249722	0.0835484	0.268067	0.0625648	0.11857	0.417117	0.119895	0.411896	-0.111026	0.447569	-0.610602	3.18014e-06	-0.657345	2.88509e-07	-0.314225	0.027891	0.843643	2.74844e-14	0.484554	0.000418551	0.537473	6.82735e-05	-0.419023	0.00272941
FILIP1	darkgreen	0.194606	0.18027	-0.566626	2.19344e-05	0.730462	2.56398e-09	-0.228294	0.11463	-0.512172	0.000168613	0.193046	0.183855	0.111061	0.447425	0.00407825	0.977813	-0.32612	0.0222062	-0.0329541	0.822147	-0.0939553	0.520788	0.0650953	0.656771	0.656582	3.01031e-07	0.815522	9.63857e-13	0.298812	0.0370148	-0.845571	2.09967e-14	-0.472894	0.000600754	-0.628269	1.34485e-06	0.344262	0.0154279
TPH1	darkgreen	0.148341	0.309046	-0.441985	0.00147526	0.623154	1.73488e-06	-0.156145	0.283995	-0.45872	0.000916544	-0.0473506	0.746635	0.15161	0.298386	-0.0442012	0.762981	-0.352892	0.0128803	0.159823	0.272662	0.0138812	0.924582	-0.101119	0.489354	0.329321	0.0208547	0.817221	7.91203e-13	0.246296	0.0880158	-0.823243	3.86489e-13	-0.431158	0.00198224	-0.534521	7.61532e-05	0.287166	0.0454326
ZNF501	darkgreen	0.0870278	0.552112	-0.406844	0.0037194	0.609628	3.32975e-06	-0.306205	0.0323712	-0.518126	0.000137169	-0.0447357	0.7602	0.0946224	0.517819	-0.15579	0.285106	-0.357005	0.0117988	-0.115558	0.429131	-0.0884989	0.545386	0.137437	0.346344	0.474678	0.000568909	0.782321	3.17385e-11	0.21464	0.138603	-0.826977	2.44467e-13	-0.493222	0.000317259	-0.499483	0.000258504	0.299594	0.036499
NABP1	darkgreen	0.369741	0.00892925	-0.4778	0.000516815	0.825535	2.92162e-13	-0.333284	0.0192783	-0.645025	5.64967e-07	0.23778	0.0999324	0.312931	0.0285765	-0.298327	0.0373376	-0.430127	0.00203778	0.156893	0.281667	0.0669127	0.647808	-0.0341657	0.815719	0.475805	0.000549585	0.839029	5.15911e-14	0.428396	0.00213411	-0.892796	6.79939e-18	-0.34522	0.0151257	-0.582068	1.14942e-05	0.415273	0.00300589
MYADM	darkgreen	-0.3784	0.00734216	0.0355441	0.808422	-0.560431	2.81716e-05	0.311864	0.0291524	0.417093	0.00286876	-0.166943	0.251588	-0.266464	0.0642111	0.0753513	0.60685	0.385971	0.00616126	0.0230553	0.875054	-0.0377419	0.79682	0.0743175	0.611807	-0.568501	2.03147e-05	-0.721932	4.79974e-09	-0.229216	0.113133	0.830992	1.47581e-13	0.473645	0.000587157	0.654313	3.4135e-07	-0.25049	0.0825713
INSM1	darkgreen	0.356225	0.0119975	-0.532983	8.05805e-05	0.822393	4.283e-13	-0.141146	0.333359	-0.650954	4.10404e-07	0.101909	0.485952	0.271366	0.0592833	-0.092206	0.528613	-0.466283	0.000733242	0.0639515	0.662437	0.00685718	0.962703	-0.255855	0.075994	0.257945	0.0735476	0.786259	2.16638e-11	0.382529	0.00667581	-0.787243	1.96677e-11	-0.292016	0.041755	-0.503192	0.000228545	0.326886	0.0218763
SURF4	darkgreen	-0.327385	0.0216635	0.464182	0.000780523	-0.751927	4.74343e-10	0.276703	0.0542689	0.520108	0.000127954	-0.137627	0.345673	-0.19167	0.18706	0.202392	0.163121	0.383797	0.00648213	-0.0678285	0.64331	-0.043858	0.764769	-0.0344345	0.814295	-0.601412	4.87615e-06	-0.836776	6.96595e-14	-0.334258	0.0189067	0.919083	1.23105e-20	0.403447	0.0040466	0.632608	1.07969e-06	-0.345214	0.0151275
SSH3	darkgreen	-0.413526	0.00314297	0.462374	0.000823382	-0.772173	8.19724e-11	0.240892	0.0954408	0.613174	2.81482e-06	-0.111655	0.444986	-0.241077	0.0951796	0.272338	0.0583432	0.367548	0.00937539	-0.0307149	0.834056	-0.103524	0.479027	-0.0494174	0.735968	-0.36977	0.00892351	-0.746677	7.27806e-10	-0.408012	0.00361242	0.862846	1.57827e-15	0.26791	0.0627249	0.371633	0.00855918	-0.448024	0.00124585
UBALD2	darkgreen	-0.26233	0.0686152	0.251883	0.080822	-0.48909	0.000362386	0.222463	0.124449	0.414849	0.00303867	-0.12642	0.386722	-0.187062	0.198086	0.0152473	0.917184	0.292637	0.0413021	0.0746119	0.610394	0.0413718	0.777754	-0.180186	0.215379	-0.452652	0.00109221	-0.700041	2.16976e-08	-0.232117	0.108521	0.872229	3.32497e-16	0.474994	0.000563428	0.398366	0.00458314	-0.352596	0.0129614
PMAIP1	darkgreen	0.394445	0.0050389	-0.634919	9.59169e-07	0.85032	1.06496e-14	-0.32978	0.0206669	-0.658757	2.66584e-07	0.259986	0.0712179	0.404787	0.00391464	-0.191147	0.18829	-0.472693	0.000604439	0.250887	0.0820695	0.183792	0.206183	-0.212274	0.14311	0.334577	0.0187863	0.76598	1.42871e-10	0.516979	0.000142777	-0.817143	7.98474e-13	-0.205421	0.156782	-0.403219	0.00406948	0.491753	0.000332678
CLTA	darkgreen	0.159044	0.275037	-0.504402	0.000219477	0.663053	2.09102e-07	-0.0434194	0.767055	-0.508511	0.000191066	0.0255565	0.861625	0.12189	0.404098	-0.0436806	0.765693	-0.424128	0.00238914	-0.00824598	0.955156	-0.0955137	0.513865	-0.100453	0.492233	0.521214	0.000123062	0.897303	2.60802e-18	0.189821	0.19143	-0.84149	3.69619e-14	-0.460828	0.000861718	-0.586816	9.36036e-06	0.196426	0.17615
ZCCHC3	darkgreen	-0.1655	0.255767	0.460901	0.000859875	-0.548933	4.42465e-05	0.0184664	0.899781	0.441648	0.0014891	0.0932991	0.523716	0.0140561	0.923634	0.0565951	0.699313	0.327552	0.0215928	0.081124	0.579495	0.105375	0.471158	-0.223917	0.121943	-0.457438	0.000951387	-0.865608	1.0101e-15	-0.0694135	0.635555	0.859296	2.76226e-15	0.566667	2.18978e-05	0.521967	0.000119828	-0.179521	0.217106
MLEC	darkgreen	-0.251674	0.0810828	0.238393	0.0990349	-0.429273	0.00208483	0.264726	0.0660347	0.346111	0.0148486	-0.252911	0.0795504	-0.161469	0.267689	-0.0105615	0.942583	0.279955	0.0513853	0.0411249	0.779047	0.0936351	0.522216	-0.0481449	0.74253	-0.4093	0.00349753	-0.699906	2.1891e-08	-0.218006	0.132372	0.842422	3.2528e-14	0.522563	0.000117322	0.642708	6.38934e-07	-0.244166	0.0908877
PKIB	darkgreen	0.533097	8.02428e-05	-0.427543	0.00218308	0.811116	1.59341e-12	-0.512965	0.000164074	-0.682255	6.71878e-08	0.454292	0.00104199	0.496445	0.00028565	-0.21303	0.141658	-0.428902	0.00210556	0.230267	0.111445	0.257808	0.0737056	-0.194192	0.181217	0.367599	0.00936486	0.698582	2.38792e-08	0.586528	9.4786e-06	-0.851213	9.34884e-15	-0.17979	0.216406	-0.339624	0.0169663	0.606844	3.79365e-06
CCNB1	darkgreen	0.384138	0.00643078	-0.548793	4.44857e-05	0.799605	5.58239e-12	-0.396348	0.00481307	-0.614746	2.61109e-06	0.227938	0.115213	0.380473	0.00700083	-0.327698	0.0215311	-0.401582	0.00423679	0.195161	0.179007	0.211287	0.145022	-0.211853	0.143924	0.424586	0.00236057	0.744865	8.41679e-10	0.510654	0.000177614	-0.80165	4.49474e-12	-0.175951	0.226538	-0.470153	0.000652819	0.452152	0.00110797
C4orf46	darkgreen	0.422737	0.0024779	-0.499462	0.000258689	0.775852	5.84463e-11	-0.44475	0.00136593	-0.655055	3.27642e-07	0.308686	0.0309255	0.361098	0.0108007	-0.135472	0.35335	-0.40657	0.00374492	0.0767715	0.600068	0.113537	0.437301	-0.0601948	0.681176	0.33854	0.0173439	0.749511	5.78392e-10	0.493759	0.000311782	-0.875151	1.99619e-16	-0.313206	0.0284298	-0.431599	0.00195892	0.531663	8.4566e-05
SDR39U1	darkgreen	-0.168291	0.247724	0.242638	0.0929914	-0.467339	0.000710449	0.238004	0.0996033	0.364538	0.010019	-0.0305276	0.835053	-0.0293628	0.841264	0.0908012	0.534939	0.196184	0.176693	0.119234	0.414496	0.146008	0.316802	-0.199356	0.169659	-0.628857	1.30571e-06	-0.732823	2.14651e-09	-0.102094	0.485156	0.858942	2.9183e-15	0.600801	5.01433e-06	0.697898	2.49706e-08	-0.196848	0.175203
RASSF9	darkgreen	0.269322	0.0612997	-0.470991	0.000636492	0.691345	3.80861e-08	-0.240731	0.0956699	-0.525367	0.00010617	0.0455418	0.75601	0.116196	0.426572	-0.0444161	0.761863	-0.401419	0.00425375	-0.0549482	0.707667	0.0240435	0.869744	0.122256	0.402681	0.435332	0.00177092	0.853818	6.36124e-15	0.262305	0.0686436	-0.850997	9.64796e-15	-0.441985	0.00147526	-0.525103	0.000107177	0.314064	0.0279753
HAUS4	darkgreen	-0.214891	0.13813	0.42785	0.00216535	-0.486835	0.000389392	0.0404823	0.782415	0.381973	0.00676247	-0.0849777	0.561551	0.0680563	0.642193	-0.10605	0.46831	0.257865	0.0736395	0.173582	0.232952	0.191488	0.187487	-0.0880339	0.547508	-0.499585	0.000257635	-0.852622	7.59874e-15	-0.0752713	0.607233	0.902319	8.50978e-19	0.626231	1.48926e-06	0.717343	6.66159e-09	-0.151468	0.298844
WDHD1	darkgreen	0.288067	0.0447298	-0.516532	0.000145018	0.718376	6.19123e-09	-0.189593	0.191975	-0.523229	0.000114582	0.0428513	0.770019	0.171929	0.237501	-0.159575	0.273419	-0.358104	0.0115234	0.00908225	0.950614	0.0433267	0.767539	-0.0637361	0.663506	0.267288	0.0633599	0.830288	1.61395e-13	0.296576	0.038523	-0.826379	2.63275e-13	-0.335239	0.0185385	-0.526667	0.000101334	0.276554	0.0544042
TFPI	darkgreen	0.20985	0.147842	-0.549975	4.2501e-05	0.734744	1.85494e-09	-0.174765	0.229735	-0.541974	5.76872e-05	-0.0170446	0.907462	0.217065	0.134093	-0.210784	0.146005	-0.410653	0.00338037	0.0974838	0.505181	0.0998029	0.495055	-0.0349732	0.811442	0.492333	0.000326516	0.868211	6.57307e-16	0.243736	0.0914754	-0.820605	5.30723e-13	-0.347733	0.0143559	-0.485048	0.000412071	0.23616	0.102334
LOC399491	darkgreen	-0.23779	0.099918	0.221632	0.125898	-0.407703	0.00364041	0.259031	0.0723006	0.347481	0.0144315	-0.136579	0.349393	0.0312178	0.831378	-0.0591493	0.686426	0.19195	0.186406	0.211742	0.144138	0.203034	0.161762	-0.190737	0.189256	-0.469407	0.000667669	-0.761988	2.02582e-10	-0.0929481	0.525286	0.871946	3.49106e-16	0.64996	4.33193e-07	0.736732	1.59278e-09	-0.187427	0.197196
GSTZ1	darkgreen	-0.270093	0.0605326	0.445201	0.00134882	-0.678127	8.63703e-08	0.112396	0.441951	0.576645	1.44768e-05	-0.118881	0.415888	-0.189826	0.191419	0.167061	0.251248	0.441907	0.00147845	-0.131277	0.368592	-0.0248862	0.86522	-0.0796034	0.586646	-0.544268	5.28907e-05	-0.8156	9.55207e-13	-0.304555	0.0333638	0.905282	4.2667e-19	0.425607	0.00229786	0.467113	0.00071528	-0.39533	0.00493279
PDCD4	darkgreen	0.169007	0.245691	-0.535556	7.33013e-05	0.599617	5.29244e-06	-0.10302	0.481182	-0.521524	0.00012172	-0.0179706	0.902458	-0.0145452	0.920985	0.0572486	0.696007	-0.23358	0.106249	-0.140305	0.336277	-0.218609	0.131279	0.0786672	0.591068	0.353591	0.0126906	0.828498	2.02246e-13	0.206641	0.154281	-0.87098	4.11956e-16	-0.50884	0.00018894	-0.562994	2.54163e-05	0.286639	0.0458474
SMPD1	darkgreen	-0.445907	0.00132239	0.13034	0.372048	-0.573076	1.68126e-05	0.401864	0.0042075	0.478924	0.000499147	-0.205143	0.157357	-0.309519	0.0304527	0.319305	0.0253299	0.32453	0.0229043	0.101681	0.486933	0.0362042	0.804933	-0.186407	0.19969	-0.431487	0.00196483	-0.632861	1.0658e-06	-0.369201	0.00903742	0.883618	4.22174e-17	0.411999	0.00326725	0.436611	0.0017103	-0.483659	0.000430521
MGC24103	darkgreen	0.188167	0.1954	-0.568491	2.03226e-05	0.72956	2.74278e-09	-0.137237	0.347056	-0.519351	0.000131404	-0.0249647	0.8648	0.123091	0.399448	-0.0998845	0.4947	-0.44443	0.00137819	0.114316	0.434141	0.0504482	0.730665	-0.101816	0.486352	0.554634	3.54459e-05	0.833429	1.07936e-13	0.291139	0.0424012	-0.827759	2.21817e-13	-0.375396	0.00786251	-0.548716	4.4618e-05	0.330024	0.0205676
TMEM203	darkgreen	-0.0320775	0.826804	0.456306	0.000983139	-0.468481	0.000686524	0.059898	0.682665	0.367215	0.00944482	-0.0624512	0.669897	0.0569094	0.697722	-0.0682496	0.641245	0.26774	0.0628978	0.156963	0.281448	0.222897	0.123697	-0.111585	0.445272	-0.697776	2.517e-08	-0.840307	4.34177e-14	-0.0591106	0.68662	0.896194	3.31537e-18	0.687512	4.85043e-08	0.745364	8.08728e-10	-0.177774	0.221686
ZNF670	darkgreen	0.187389	0.197288	-0.458535	0.00092148	0.652673	3.73578e-07	-0.165061	0.25705	-0.557129	3.21258e-05	0.17588	0.22673	0.216634	0.134885	-0.109321	0.454619	-0.382756	0.00664086	0.0510762	0.727441	-0.0959433	0.511965	0.107113	0.463835	0.590029	8.13084e-06	0.772816	7.73039e-11	0.350674	0.0134979	-0.870893	4.18137e-16	-0.455564	0.00100448	-0.506612	0.000203748	0.4305	0.00201751
ZNF684	darkgreen	0.284028	0.0479503	-0.453019	0.00108081	0.690681	3.97251e-08	-0.371887	0.00851065	-0.589219	8.4256e-06	0.189304	0.192664	0.272973	0.0577357	-0.178703	0.219242	-0.411753	0.0032877	0.0887677	0.544162	0.0562572	0.701024	0.029957	0.838095	0.51323	0.000162582	0.830321	1.60717e-13	0.375798	0.00779109	-0.913453	5.61398e-20	-0.391841	0.00536303	-0.502581	0.000233256	0.430283	0.00202929
RUNDC3B	darkgreen	0.374425	0.00803746	-0.43741	0.00167333	0.79881	6.06911e-12	-0.285836	0.0464861	-0.682731	6.52498e-08	0.238104	0.0994573	0.427208	0.00220257	-0.343232	0.0157591	-0.540314	6.14041e-05	0.210253	0.147046	0.077033	0.598823	-0.0125248	0.931932	0.505264	0.000213218	0.779193	4.27477e-11	0.437343	0.00167643	-0.842449	3.24108e-14	-0.31077	0.0297534	-0.398487	0.00456976	0.477488	0.000521831
SLC41A3	darkgreen	-0.326106	0.0222121	0.351597	0.0132378	-0.59849	5.57048e-06	0.227447	0.116019	0.422463	0.00249574	-0.164389	0.259018	-0.0910683	0.533734	0.171844	0.237736	0.218298	0.131842	0.0265873	0.856102	0.0888872	0.543617	-0.135966	0.35158	-0.434417	0.00181542	-0.714275	8.26518e-09	-0.222306	0.124722	0.833847	1.02252e-13	0.507021	0.000200952	0.613533	2.76705e-06	-0.29897	0.0369102
VGLL3	darkgreen	0.355273	0.0122442	-0.473997	0.000580883	0.762796	1.88852e-10	-0.297357	0.0379902	-0.536984	6.95258e-05	0.285962	0.0463856	0.300554	0.0358744	-0.139527	0.338988	-0.450995	0.00114517	-0.0353446	0.809477	0.00372094	0.979756	0.099897	0.494646	0.463437	0.000797932	0.773091	7.53829e-11	0.418772	0.00274714	-0.87447	2.25074e-16	-0.354207	0.0125256	-0.497091	0.00027967	0.430938	0.00199397
COPZ1	darkgreen	-0.109206	0.455097	0.392244	0.00531178	-0.532222	8.28559e-05	0.289457	0.0436638	0.367942	0.00929385	-0.226746	0.117178	-0.153721	0.291632	0.00825628	0.9551	0.295264	0.0394308	0.174051	0.231672	0.212665	0.142359	-0.0972928	0.506019	-0.567467	2.1194e-05	-0.671285	1.29838e-07	-0.292146	0.0416599	0.878322	1.13098e-16	0.581127	1.19676e-05	0.568829	2.00423e-05	-0.411424	0.00331518
ZNF672	darkgreen	-0.222845	0.123786	0.42149	0.00255994	-0.512898	0.000164452	0.162422	0.264838	0.380535	0.00699069	-0.23395	0.105681	-0.0245379	0.86709	-0.0602042	0.681129	0.214864	0.138182	0.162023	0.266031	0.237174	0.100825	-0.0892725	0.541865	-0.50442	0.000219347	-0.699283	2.28066e-08	-0.243311	0.0920592	0.877967	1.20602e-16	0.58722	9.19677e-06	0.628939	1.3003e-06	-0.387049	0.0060073
CCDC102B	darkgreen	0.334487	0.0188204	-0.360739	0.0108853	0.723894	4.1636e-09	-0.381943	0.00676712	-0.516224	0.000146577	0.158626	0.276317	0.170929	0.240283	-0.0425156	0.771772	-0.347976	0.0142832	-0.09307	0.524741	0.0243417	0.868143	0.0160278	0.91296	0.446897	0.00128608	0.835713	8.0145e-14	0.294123	0.040235	-0.830682	1.53521e-13	-0.430309	0.00202785	-0.670281	1.37717e-07	0.270954	0.0596854
AMT	darkgreen	-0.486454	0.000394141	0.0373058	0.799119	-0.559899	2.8777e-05	0.46738	0.000709587	0.465272	0.000755659	-0.353589	0.0126913	-0.338569	0.0173338	0.111022	0.447587	0.302603	0.0345694	-0.0337038	0.818169	-0.118453	0.41758	-0.0269907	0.853942	-0.268999	0.0616232	-0.586708	9.40465e-06	-0.407969	0.00361631	0.85263	7.5889e-15	0.319138	0.0254108	0.374909	0.00794988	-0.464814	0.000766027
ZNF780A	darkgreen	0.52949	9.15203e-05	-0.367643	0.00935573	0.764893	1.57224e-10	-0.525554	0.000105463	-0.564002	2.4402e-05	0.423258	0.00244435	0.404823	0.00391115	-0.241429	0.0946828	-0.41201	0.00326635	0.218466	0.131537	0.201302	0.165448	-0.030501	0.835195	0.316717	0.0266086	0.733627	2.0197e-09	0.505089	0.000214472	-0.861683	1.89906e-15	-0.270705	0.0599299	-0.458282	0.000928319	0.525922	0.000104078
TMEM214	darkgreen	-0.295995	0.038923	0.399997	0.00440457	-0.588809	8.5788e-06	0.329938	0.0206026	0.450341	0.0011667	-0.232703	0.107606	-0.175258	0.228403	0.0942251	0.519586	0.26952	0.0611016	0.0697034	0.63414	0.113517	0.437383	-0.254512	0.0776009	-0.505502	0.000211515	-0.740465	1.19199e-09	-0.321185	0.0244334	0.937578	3.39902e-23	0.532485	8.20619e-05	0.481776	0.000456716	-0.463199	0.000803567
TBC1D16	darkgreen	-0.349722	0.0137706	0.303921	0.0337516	-0.669742	1.42128e-07	0.281513	0.0500487	0.371436	0.00859721	-0.164138	0.259757	-0.218083	0.132233	0.130968	0.36973	0.290911	0.0425706	-0.0394631	0.787764	-0.0842114	0.565098	0.226615	0.117395	-0.381804	0.00678888	-0.684716	5.77311e-08	-0.310207	0.0300663	0.801776	4.43497e-12	0.349734	0.0137672	0.614836	2.5998e-06	-0.330959	0.0201903
PYCR1	darkgreen	-0.498438	0.000267572	0.340385	0.0167054	-0.636687	8.75533e-07	0.353889	0.0126107	0.438982	0.00160277	-0.357545	0.0116627	-0.245182	0.0895089	0.0506373	0.729694	0.286008	0.0463491	-0.152484	0.295578	-0.117935	0.419635	0.0602382	0.680959	-0.305805	0.0326096	-0.657649	2.83651e-07	-0.42429	0.00237903	0.858882	2.94559e-15	0.319377	0.0252949	0.511669	0.000171547	-0.480651	0.00047305
GJB1	darkgreen	-0.412027	0.00326495	0.440518	0.00153636	-0.715466	7.60379e-09	0.410744	0.00337262	0.585872	9.75316e-06	-0.451464	0.00112996	-0.44572	0.00132933	0.23097	0.110327	0.408915	0.0035315	-0.200956	0.16619	-0.148892	0.307234	0.0911374	0.533422	-0.488829	0.000365422	-0.603094	4.51372e-06	-0.530477	8.82984e-05	0.800764	4.93898e-12	0.216865	0.13446	0.256388	0.0753646	-0.592388	7.32508e-06
SLC16A6	darkgreen	0.479064	0.000496978	-0.445721	0.00132928	0.808686	2.0907e-12	-0.595626	6.33866e-06	-0.581507	1.17743e-05	0.54805	4.57754e-05	0.479774	0.000486146	-0.256132	0.0756669	-0.43946	0.00158184	0.174167	0.231358	0.194477	0.180564	-0.251528	0.0812655	0.313228	0.0284182	0.593696	6.91075e-06	0.666435	1.72232e-07	-0.756523	3.23222e-10	-0.120492	0.409552	-0.468253	0.000691242	0.592953	7.14334e-06
DCHS1	darkgreen	-0.115319	0.430093	0.521462	0.000121988	-0.593429	6.99355e-06	0.00264384	0.985616	0.467939	0.000697789	0.0828661	0.571351	0.03238	0.825197	-0.0253414	0.862779	0.231673	0.109217	0.104957	0.47293	0.168561	0.246956	-0.113848	0.436039	-0.470446	0.000647075	-0.807864	2.28999e-12	-0.079662	0.586369	0.835921	7.79836e-14	0.522688	0.000116805	0.515909	0.000148191	-0.160138	0.271706
SLC6A8	darkgreen	-0.58553	9.89889e-06	0.0887879	0.544069	-0.646227	5.29803e-07	0.534394	7.65093e-05	0.51191	0.000170135	-0.485892	0.000401215	-0.586303	9.57182e-06	0.318669	0.0256392	0.417613	0.00283057	-0.269933	0.0606918	-0.224917	0.120241	0.0650328	0.65708	-0.134013	0.358606	-0.429348	0.00208064	-0.651093	4.07304e-07	0.796835	7.45838e-12	0.129342	0.375754	0.133962	0.358789	-0.752764	4.42588e-10
RIT1	darkgreen	0.569399	1.9578e-05	-0.134029	0.358548	0.67078	1.33746e-07	-0.545707	5.00729e-05	-0.504265	0.000220485	0.369396	0.0089981	0.451074	0.00114259	-0.278552	0.0526137	-0.354662	0.0124048	0.126275	0.387273	0.180475	0.214632	0.10758	0.461877	0.152179	0.296557	0.511766	0.000170979	0.559295	2.94789e-05	-0.780416	3.80704e-11	-0.214787	0.138326	-0.169597	0.244022	0.666257	1.74005e-07
CDK4	darkgreen	-0.174575	0.23025	0.385202	0.00627313	-0.441397	0.00149947	0.232713	0.107591	0.407944	0.00361849	-0.215058	0.137816	-0.0696812	0.634248	-0.0554204	0.705268	0.263854	0.0669648	0.17339	0.233479	0.199873	0.168533	-0.100221	0.493241	-0.473403	0.000591514	-0.707259	1.33951e-08	-0.202597	0.162685	0.893941	5.3527e-18	0.581712	1.16712e-05	0.489863	0.000353523	-0.386907	0.00602744
ZBTB45	darkgreen	-0.361937	0.0106053	0.394913	0.00498249	-0.643962	5.97843e-07	0.168655	0.246688	0.457023	0.000962907	-0.158241	0.277501	-0.0989039	0.498967	-0.00371362	0.979796	0.298217	0.0374111	-0.108914	0.45631	-0.0503291	0.731277	-0.0510097	0.727783	-0.371032	0.00867521	-0.737519	1.49896e-09	-0.289462	0.0436599	0.864096	1.29129e-15	0.391412	0.00541811	0.419594	0.00268931	-0.3758	0.00779074
RPRD2	darkgreen	-0.153532	0.292232	0.272991	0.0577192	-0.36925	0.0090275	0.061513	0.674578	0.377027	0.00757612	0.091122	0.533491	0.014276	0.922443	0.0721233	0.622386	0.256596	0.07512	0.195313	0.178661	0.210058	0.147431	-0.25512	0.0768698	-0.476127	0.000544166	-0.800601	5.02511e-12	0.00191674	0.989571	0.809541	1.90095e-12	0.651299	4.02745e-07	0.589932	8.16543e-06	-0.114366	0.43394
SLCO4A1-AS1	darkgreen	-0.251452	0.0813596	0.505372	0.000212446	-0.71872	6.04177e-09	0.266042	0.0646503	0.425805	0.00228591	-0.234328	0.105102	-0.22394	0.121904	0.125638	0.389691	0.408861	0.00353634	-0.0133141	0.927654	-0.00764055	0.958446	0.11767	0.420689	-0.539783	6.26375e-05	-0.743676	9.25345e-10	-0.354669	0.0124029	0.849922	1.12821e-14	0.38637	0.00610392	0.627324	1.41011e-06	-0.361245	0.0107661
AP3D1	darkgreen	-0.185686	0.201464	0.196218	0.176616	-0.392975	0.00521972	0.342016	0.0161575	0.292761	0.0412118	-0.166911	0.251681	-0.00963308	0.947623	-0.0477353	0.744646	0.17754	0.222304	0.15274	0.294756	0.157691	0.279194	-0.12914	0.376504	-0.455925	0.000994053	-0.680181	7.62602e-08	-0.136904	0.348238	0.802568	4.07456e-12	0.574212	1.60337e-05	0.729754	2.70344e-09	-0.221807	0.125593
NETO2	darkgreen	0.409083	0.00351668	-0.575587	1.51359e-05	0.873372	2.72753e-16	-0.409856	0.00344894	-0.698141	2.45773e-08	0.305615	0.032723	0.568915	1.99723e-05	-0.350168	0.0136424	-0.488994	0.000363498	0.185582	0.201723	0.15744	0.279971	-0.278741	0.052447	0.42998	0.00204579	0.682052	6.80257e-08	0.613136	2.81986e-06	-0.771897	8.4057e-11	-0.122009	0.403637	-0.36638	0.00962073	0.539955	6.22343e-05
TPI1	darkgreen	-0.168347	0.247566	0.275706	0.0551788	-0.382211	0.00672526	0.180464	0.214659	0.37304	0.00829281	-0.217049	0.134122	-0.0606917	0.678686	-0.0817371	0.576623	0.263919	0.0668945	0.22495	0.120186	0.318599	0.0256737	-0.211479	0.144649	-0.504525	0.000218572	-0.684508	5.84776e-08	-0.178429	0.219961	0.890739	1.0383e-17	0.691442	3.7851e-08	0.537281	6.87639e-05	-0.399166	0.00449475
FBP1	darkgreen	-0.207406	0.152727	0.45232	0.00110265	-0.586963	9.30059e-06	0.230444	0.111163	0.458247	0.000929267	-0.226247	0.118007	-0.103727	0.47816	0.017195	0.906649	0.282746	0.0490105	-0.0164397	0.910733	0.0932024	0.524149	-0.049742	0.734297	-0.497104	0.00027955	-0.774018	6.92381e-11	-0.27767	0.0533984	0.934107	1.16667e-22	0.552224	3.89483e-05	0.557382	3.1806e-05	-0.40756	0.00365347
GSTO2	darkgreen	-0.600281	5.13467e-06	0.277896	0.0531962	-0.737833	1.46303e-09	0.408122	0.00360243	0.552287	3.8853e-05	-0.319691	0.0251435	-0.298646	0.0371249	0.222852	0.123775	0.405434	0.00385221	-0.253925	0.0783111	-0.245176	0.0895165	0.109515	0.453812	-0.207421	0.152696	-0.706586	1.40194e-08	-0.433951	0.00183847	0.788142	1.79981e-11	0.258269	0.0731738	0.444086	0.00139152	-0.467915	0.000698307
SMARCD2	darkgreen	-0.310294	0.0300175	0.175511	0.22772	-0.471285	0.000630853	0.324994	0.0226987	0.329498	0.0207822	-0.21844	0.131585	-0.0823812	0.573612	0.0308185	0.833503	0.219397	0.12986	0.187228	0.19768	0.12087	0.408075	-0.183848	0.206042	-0.46735	0.000710224	-0.639292	7.64632e-07	-0.223198	0.123178	0.840175	4.42022e-14	0.517871	0.0001384	0.647494	4.94981e-07	-0.301194	0.0354621
RBM12B	darkgreen	0.333377	0.0192428	-0.394847	0.00499038	0.655291	3.23404e-07	-0.405673	0.00382943	-0.434487	0.001812	0.349367	0.0138738	0.461338	0.000848887	-0.130043	0.373147	-0.217928	0.132515	0.00253871	0.986188	-0.072128	0.622363	0.0124833	0.932158	0.307064	0.0318647	0.451121	0.00114106	0.558751	3.01243e-05	-0.748719	6.16909e-10	-0.280195	0.0511776	-0.131848	0.366492	0.719141	5.8633e-09
PRKCQ-AS1	darkgreen	0.22063	0.127663	-0.519069	0.000132711	0.699904	2.18942e-08	-0.204726	0.15822	-0.561086	2.74427e-05	0.106601	0.465989	0.143554	0.325093	-0.127079	0.384234	-0.403944	0.00399723	0.0565409	0.699587	-0.0325424	0.824334	-0.0388479	0.790998	0.5072	0.000199747	0.925774	1.74555e-21	0.251535	0.0812556	-0.895939	3.50213e-18	-0.450912	0.00114789	-0.673165	1.16204e-07	0.22174	0.12571
CXorf40A	darkgreen	-0.187942	0.195944	0.347948	0.0142917	-0.515599	0.000149795	0.321157	0.0244464	0.371943	0.00849985	-0.30298	0.0343336	-0.202916	0.162012	0.0171698	0.906785	0.266728	0.0639378	0.0444032	0.761929	0.147889	0.310541	-0.0985903	0.500336	-0.484809	0.000415196	-0.607986	3.59662e-06	-0.34225	0.0160803	0.875749	1.79557e-16	0.518151	0.000137052	0.471766	0.000621717	-0.493383	0.000315599
GPR180	darkgreen	0.219125	0.130348	-0.358918	0.0113228	0.656458	3.03118e-07	-0.281712	0.0498798	-0.568936	1.99545e-05	0.136193	0.350769	0.221908	0.125416	-0.236327	0.102083	-0.288361	0.044503	0.118817	0.416143	-0.00225377	0.987738	0.0327224	0.823377	0.672038	1.24207e-07	0.756773	3.16471e-10	0.292661	0.0412843	-0.87681	1.48567e-16	-0.483812	0.000428451	-0.474127	0.000578572	0.415722	0.00297157
NXPE3	darkgreen	0.47497	0.000563848	-0.516423	0.000145566	0.841791	3.54737e-14	-0.413419	0.00315154	-0.643035	6.27993e-07	0.433591	0.00185649	0.455961	0.00099302	-0.210972	0.145637	-0.483158	0.000437362	0.214014	0.139785	0.144108	0.323211	-0.156832	0.281854	0.399094	0.00450269	0.771548	8.67633e-11	0.533099	8.02369e-05	-0.858493	3.12827e-15	-0.241622	0.0944104	-0.430674	0.00200815	0.48985	0.000353672
FOXK2	darkgreen	-0.0116644	0.936599	0.499403	0.000259188	-0.565346	2.31081e-05	-0.0991771	0.497777	0.455715	0.00100009	0.0589189	0.687585	0.0315783	0.829459	-0.0307585	0.833823	0.355571	0.0121667	0.0457481	0.754939	0.159186	0.274606	-0.103119	0.480757	-0.603408	4.44884e-06	-0.84505	2.25893e-14	-0.0729084	0.618592	0.831015	1.47148e-13	0.527318	9.89911e-05	0.544709	5.2013e-05	-0.139333	0.339667
ATP6AP1	darkgreen	-0.290269	0.0430503	0.273726	0.0570222	-0.547053	4.7561e-05	0.218384	0.131687	0.472283	0.000612032	-0.230554	0.110987	-0.250272	0.0828468	0.074418	0.611324	0.373442	0.00821788	0.128942	0.377244	0.14633	0.315726	-0.000918191	0.995004	-0.445719	0.00132935	-0.723364	4.32716e-09	-0.304377	0.0334719	0.917606	1.85235e-20	0.524437	0.000109758	0.510697	0.000177351	-0.415868	0.00296048
ATP5D	darkgreen	-0.332403	0.0196197	0.256278	0.0754939	-0.569069	1.98457e-05	0.330359	0.0204319	0.451629	0.00112466	-0.279753	0.051561	-0.292006	0.0417619	0.133814	0.359326	0.335088	0.0185951	-0.0133866	0.927261	0.0532193	0.716474	-0.0571222	0.696646	-0.517924	0.000138144	-0.699056	2.3148e-08	-0.357509	0.0116717	0.93086	3.48445e-22	0.501161	0.000244541	0.491329	0.000337263	-0.479542	0.00048966
DBP	darkgreen	-0.318204	0.0258674	0.283936	0.0480256	-0.572534	1.71961e-05	0.317842	0.0260465	0.450312	0.00116765	-0.414364	0.00307652	-0.486703	0.000391038	0.212474	0.142725	0.425062	0.00233115	-0.287579	0.0451097	-0.108867	0.456506	0.0232557	0.873977	-0.379927	0.00708937	-0.474337	0.000574874	-0.532075	8.33008e-05	0.736136	1.66752e-09	0.215127	0.137687	0.161069	0.268895	-0.641049	6.97342e-07
CCNA2	darkgreen	0.430306	0.00202804	-0.413804	0.0031208	0.743993	9.02307e-10	-0.461042	0.000856313	-0.657135	2.91895e-07	0.390474	0.00554042	0.515628	0.000149645	-0.295093	0.0395506	-0.532157	8.30542e-05	0.311689	0.0292482	0.18621	0.200173	-0.116307	0.426128	0.359353	0.0112169	0.631075	1.16724e-06	0.62011	2.01446e-06	-0.805971	2.81933e-12	-0.19983	0.168627	-0.26728	0.0633686	0.662826	2.11825e-07
MPV17	darkgreen	-0.120055	0.411264	0.493663	0.000312749	-0.538678	6.52781e-05	-0.0477715	0.744459	0.517787	0.000138805	0.0395166	0.787483	0.0232349	0.874089	-0.00820468	0.955381	0.340605	0.0166307	-0.0288866	0.843806	0.0805567	0.582158	-0.140301	0.336291	-0.399927	0.00441203	-0.828185	2.10324e-13	-0.113615	0.436984	0.845695	2.06343e-14	0.502763	0.000231841	0.424389	0.00237284	-0.23615	0.102348
ZMIZ2	darkgreen	-0.301777	0.0350909	-0.00285531	0.984465	-0.372959	0.00830794	0.33967	0.0169504	0.210721	0.146129	-0.0655097	0.654723	0.00158726	0.991364	0.0641525	0.661439	0.0614512	0.674887	0.186063	0.200536	0.102559	0.48316	-0.225227	0.119718	-0.0745973	0.610464	-0.433885	0.00184176	-0.139416	0.339378	0.604437	4.24244e-06	0.363747	0.0101941	0.472691	0.000604472	-0.227914	0.115252
MLPH	darkgreen	-0.300013	0.036225	0.0944083	0.518771	-0.461534	0.000844017	0.368666	0.00914554	0.317241	0.0263454	-0.191252	0.188041	-0.0517061	0.724212	0.00923632	0.949777	0.177888	0.221387	0.0967659	0.508337	0.0629707	0.66731	-0.0334995	0.819252	-0.276791	0.0541894	-0.619854	2.03975e-06	-0.216799	0.134581	0.722545	4.59182e-09	0.420706	0.00261278	0.696724	2.69546e-08	-0.217568	0.133172
SLC20A2	darkgreen	-0.487625	0.000379735	0.284559	0.0475162	-0.725827	3.61507e-09	0.501772	0.00023962	0.562692	2.57277e-05	-0.427085	0.00220976	-0.474293	0.000575643	0.240755	0.0956352	0.400235	0.004379	-0.102931	0.481565	-0.0529094	0.718056	0.106538	0.46625	-0.333051	0.0193682	-0.65925	2.59317e-07	-0.554821	3.51865e-05	0.85572	4.78024e-15	0.291936	0.0418135	0.480926	0.000469016	-0.546113	4.93024e-05
USP11	darkgreen	-0.14646	0.315291	0.270122	0.0605044	-0.383181	0.00657562	0.122051	0.403476	0.362315	0.0105184	-0.092501	0.52729	0.00705959	0.961603	-0.02816	0.847688	0.211143	0.145304	0.113051	0.439279	0.233351	0.106602	-0.284949	0.0471999	-0.533584	7.88231e-05	-0.740386	1.19938e-09	-0.111393	0.446061	0.906424	3.25021e-19	0.688009	4.70159e-08	0.577999	1.36718e-05	-0.300028	0.0362155
POLDIP2	darkgreen	-0.378689	0.00729376	0.291993	0.0417715	-0.604556	4.21917e-06	0.268903	0.0617203	0.433095	0.00188152	-0.124248	0.394998	-0.0839001	0.566542	0.0880992	0.54721	0.273207	0.0575134	0.0540486	0.712245	0.0452854	0.757342	-0.0759401	0.604034	-0.495853	0.000291235	-0.796257	7.91839e-12	-0.238345	0.0991048	0.929986	4.63503e-22	0.527984	9.66419e-05	0.679852	7.7805e-08	-0.324852	0.0227616
HK1	darkgreen	-0.223518	0.122627	0.113715	0.436578	-0.360471	0.0109486	0.347044	0.0145635	0.290564	0.0428295	-0.183181	0.20772	-0.0148347	0.919417	-0.065077	0.656862	0.151577	0.298493	0.14294	0.327189	0.129119	0.376582	-0.178443	0.219925	-0.398252	0.00459591	-0.694256	3.16164e-08	-0.0919537	0.529747	0.800767	4.93725e-12	0.600463	5.09222e-06	0.709196	1.17395e-08	-0.180566	0.214396
SMARCA4	darkgreen	-0.234661	0.104596	0.101608	0.487244	-0.33921	0.0171097	0.16781	0.2491	0.236257	0.102189	-0.138524	0.342507	0.123426	0.398156	-0.190814	0.189075	0.165949	0.254463	0.200012	0.16823	0.165694	0.255204	-0.21455	0.138773	-0.303562	0.0339729	-0.656102	3.09175e-07	0.0303516	0.835991	0.671488	1.28297e-07	0.540661	6.06083e-05	0.6925	3.53829e-08	-0.00772132	0.958007
C1orf43	darkgreen	-0.0205149	0.888729	0.342253	0.016079	-0.347473	0.0144341	0.191576	0.187282	0.401869	0.00420697	-0.230305	0.111385	-0.259529	0.0717349	0.0812237	0.579027	0.324687	0.0228347	0.069045	0.637354	0.217802	0.132744	-0.188379	0.194887	-0.37152	0.00858101	-0.564962	2.34717e-05	-0.311798	0.0291884	0.797751	6.78044e-12	0.46963	0.000663205	0.262786	0.0681178	-0.481659	0.000458398
TBC1D13	darkgreen	-0.340137	0.01679	0.392157	0.00532272	-0.68152	7.02785e-08	0.374514	0.00802125	0.630277	1.21542e-06	-0.218527	0.131427	-0.195336	0.178609	0.200594	0.166972	0.403575	0.00403385	-0.0741221	0.612746	-0.0513365	0.726106	-0.0178718	0.902992	-0.397468	0.00468421	-0.764607	1.61228e-10	-0.388477	0.00580859	0.891336	9.19107e-18	0.381556	0.00682797	0.379823	0.00710623	-0.506625	0.000203659
CHMP1A	darkgreen	-0.305964	0.0325147	0.244826	0.0899899	-0.543305	5.48593e-05	0.347355	0.0144695	0.417631	0.00282931	-0.213257	0.141224	-0.130093	0.372962	0.124967	0.392249	0.299362	0.0366517	0.145117	0.319798	0.0518782	0.72333	-0.188891	0.193656	-0.605375	4.06194e-06	-0.729607	2.73329e-09	-0.220724	0.127497	0.880775	7.20648e-17	0.526982	0.000100194	0.58881	8.57842e-06	-0.30438	0.0334704
PSMG3	darkgreen	-0.334192	0.0189316	0.323165	0.0235183	-0.608237	3.55457e-06	0.4268	0.00222651	0.502364	0.000234951	-0.249329	0.0840511	-0.322441	0.0238494	0.273633	0.0571095	0.347801	0.0143357	-0.0332381	0.820639	0.0232353	0.874087	-0.203042	0.161746	-0.47824	0.000509831	-0.686495	5.16874e-08	-0.372052	0.00847904	0.915292	3.4601e-20	0.456726	0.000971241	0.456223	0.000985514	-0.511157	0.000174582
NDUFA10	darkgreen	-0.204067	0.159592	0.225049	0.120019	-0.450874	0.00114913	0.163757	0.26088	0.401968	0.00419674	-0.107454	0.462404	-0.0608572	0.677858	-0.0214892	0.883481	0.287702	0.0450138	0.0531581	0.716786	0.0660312	0.652149	-0.000879236	0.995216	-0.564482	2.39325e-05	-0.844648	2.38944e-14	-0.0727659	0.619279	0.875604	1.84228e-16	0.596583	6.07182e-06	0.762454	1.94554e-10	-0.07851	0.591812
PTPRF	darkgreen	-0.277905	0.0531884	0.295925	0.0389713	-0.548791	4.44886e-05	0.341221	0.0164226	0.405491	0.00384685	-0.278304	0.0528335	-0.150078	0.303354	0.00226621	0.98767	0.293039	0.041011	0.149932	0.303828	0.155302	0.286637	-0.022904	0.875868	-0.49096	0.00034129	-0.741482	1.10055e-09	-0.26625	0.0644334	0.895378	3.94848e-18	0.565018	2.34186e-05	0.70528	1.53106e-08	-0.324453	0.0229387
COL4A2	darkgreen	-0.0193967	0.89476	0.3812	0.00688428	-0.360184	0.0110171	0.134092	0.358319	0.317267	0.0263324	-0.0846659	0.562993	0.0901115	0.538059	-0.104366	0.475439	0.130033	0.373186	0.298167	0.0374446	0.39167	0.005385	-0.315865	0.0270413	-0.632063	1.11007e-06	-0.7166	7.02071e-09	-0.019887	0.892115	0.840162	4.42787e-14	0.767156	1.28735e-10	0.596263	6.15991e-06	-0.229603	0.11251
ECHDC3	darkgreen	-0.287997	0.0447845	0.480464	0.000475823	-0.73798	1.44653e-09	0.249897	0.0833248	0.510552	0.000178231	-0.184318	0.204865	-0.236415	0.101952	0.186538	0.199368	0.383402	0.00654185	-0.136791	0.348638	-0.0374842	0.798178	0.0279438	0.848843	-0.505908	0.000208647	-0.781193	3.53586e-11	-0.359198	0.0112547	0.889967	1.21435e-17	0.371247	0.0086337	0.551082	4.07177e-05	-0.39059	0.00552509
COL6A1	darkgreen	-0.313745	0.0281434	0.188274	0.195142	-0.61089	3.13725e-06	0.428107	0.00215058	0.390846	0.00549156	-0.175872	0.22675	-0.138026	0.344263	0.100989	0.489916	0.21432	0.139206	0.0936926	0.521959	0.0800014	0.58477	-0.201055	0.165979	-0.297074	0.038183	-0.641365	6.85859e-07	-0.278636	0.0525392	0.808801	2.06429e-12	0.457909	0.000938451	0.51602	0.000147624	-0.349782	0.0137534
RASD1	darkgreen	-0.234502	0.104837	0.295025	0.0395982	-0.49099	0.000340964	0.278661	0.0525173	0.374155	0.00808667	-0.341081	0.0164696	-0.167922	0.24878	-0.0449779	0.75894	0.28234	0.0493505	0.168953	0.245844	0.179105	0.218189	-0.00539215	0.970668	-0.486462	0.000394031	-0.634251	9.92631e-07	-0.308992	0.0307513	0.801288	4.67136e-12	0.488662	0.000367384	0.653363	3.59695e-07	-0.354613	0.0124177
C19orf60	darkgreen	-0.247356	0.0866145	0.100935	0.49015	-0.382467	0.00668538	0.228543	0.114225	0.336374	0.0181201	-0.0893664	0.541438	-0.0767756	0.600049	0.0970258	0.507193	0.264237	0.0665552	0.103801	0.477845	0.132611	0.363702	-0.210084	0.147379	-0.510144	0.000180732	-0.698865	2.34401e-08	-0.130839	0.370204	0.878171	1.16237e-16	0.608975	3.43349e-06	0.642047	6.61633e-07	-0.260864	0.0702342
LUC7L	darkgreen	-0.19935	0.169673	-0.242071	0.0937811	0.0242798	0.868475	0.199941	0.168385	0.223902	0.121969	0.00702953	0.961766	0.124302	0.394791	-0.0741393	0.612663	0.0716546	0.624655	0.205798	0.156005	0.182369	0.209778	-0.318985	0.0254853	-0.289437	0.0436789	-0.490695	0.000344209	0.199545	0.169248	0.454443	0.00103749	0.491084	0.000339928	0.610222	3.23782e-06	0.19861	0.171295
EIF5B	darkgreen	0.188045	0.195696	-0.235278	0.10366	0.452809	0.00108734	-0.182065	0.210551	-0.568512	2.03051e-05	0.0217372	0.882146	0.157304	0.280391	-0.144868	0.320637	-0.427316	0.00219628	0.0706667	0.62945	-0.00869716	0.952706	-0.00663877	0.96389	0.634769	9.66551e-07	0.796447	7.76448e-12	0.156136	0.284023	-0.81754	7.62219e-13	-0.486344	0.000395518	-0.514954	0.000153184	0.254485	0.0776334
NHP2	darkgreen	-0.0345635	0.813612	0.407611	0.00364879	-0.441083	0.00151257	0.156465	0.282999	0.361871	0.0106205	-0.0710055	0.627804	0.0384282	0.793206	-0.0748848	0.609085	0.241427	0.094686	0.202984	0.161868	0.251818	0.0809024	-0.150303	0.302619	-0.662642	2.14054e-07	-0.800662	4.99261e-12	-0.106382	0.466909	0.9223	4.91822e-21	0.695725	2.87579e-08	0.720641	5.26668e-09	-0.246002	0.0884091
PIH1D1	darkgreen	-0.144778	0.320941	0.445452	0.00133934	-0.57088	1.84176e-05	0.247255	0.0867474	0.50881	0.000189134	-0.0976652	0.504385	-0.0959068	0.512126	0.0945374	0.518197	0.263536	0.067306	0.124262	0.394945	0.215756	0.136512	-0.120095	0.41111	-0.537326	6.86477e-05	-0.77051	9.53171e-11	-0.255227	0.0767424	0.939231	1.8425e-23	0.586334	9.55913e-06	0.548829	4.44236e-05	-0.415002	0.0030268
CTDNEP1	darkgreen	-0.238526	0.0988415	0.25975	0.0714849	-0.466369	0.000731347	0.264584	0.0661856	0.385841	0.00617997	-0.128655	0.378314	-0.0639993	0.662199	0.107425	0.462528	0.230599	0.110916	0.0417764	0.775637	0.0288818	0.843832	-0.234806	0.104375	-0.607077	3.75273e-06	-0.78503	2.4427e-11	-0.145818	0.31744	0.917557	1.87715e-20	0.592176	7.39418e-06	0.606063	3.93423e-06	-0.285455	0.0467915
CLNK	darkgreen	0.44526	0.00134657	-0.500635	0.000248838	0.829218	1.84745e-13	-0.38781	0.00590075	-0.609406	3.36467e-06	0.380001	0.00707732	0.585474	9.92291e-06	-0.27238	0.0583032	-0.431521	0.00196299	0.184922	0.203359	0.101616	0.487211	-0.187022	0.198183	0.395033	0.0049681	0.678224	8.58684e-08	0.591071	7.76525e-06	-0.805625	2.92792e-12	-0.172992	0.23457	-0.377209	0.00754486	0.535617	7.31349e-05
RNF167	darkgreen	-0.246679	0.0875082	0.439715	0.00157077	-0.627541	1.39486e-06	0.346873	0.0146154	0.511353	0.000173412	-0.239845	0.0969347	-0.218672	0.131165	0.145133	0.319745	0.327341	0.0216824	-0.0797796	0.585815	0.0222417	0.87943	-0.0324429	0.824862	-0.585321	9.98901e-06	-0.771341	8.84151e-11	-0.36832	0.00921622	0.947211	7.36455e-25	0.473942	0.000581856	0.532682	8.14742e-05	-0.49647	0.000285423
PLOD1	darkgreen	-0.272159	0.0585161	0.385274	0.00626257	-0.640645	7.12329e-07	0.250366	0.0827276	0.583886	1.06291e-05	-0.278565	0.0526021	-0.363477	0.0102547	0.176575	0.224869	0.402359	0.00415661	-0.107584	0.461863	0.0626551	0.668881	0.0675568	0.644643	-0.52362	0.000113001	-0.686508	5.16454e-08	-0.424867	0.00234313	0.895794	3.61252e-18	0.418831	0.00274299	0.372688	0.00835875	-0.563747	2.46557e-05
LDOC1	darkgreen	-0.157681	0.279227	0.370886	0.00870366	-0.531764	8.42538e-05	0.376312	0.0077005	0.381523	0.00683309	-0.100389	0.492513	-0.174204	0.231257	0.182218	0.210163	0.188492	0.194615	0.140878	0.334286	0.162823	0.263645	-0.129746	0.374249	-0.415225	0.00300963	-0.610893	3.13679e-06	-0.32488	0.0227492	0.84825	1.43573e-14	0.468989	0.000676134	0.506216	0.000206489	-0.461319	0.000849372
LOC101929880	darkgreen	-0.157605	0.27946	0.582916	1.10828e-05	-0.74664	7.29969e-10	0.222031	0.125201	0.537052	6.93505e-05	-0.0418593	0.775203	-0.104329	0.475598	0.113755	0.436416	0.364239	0.0100848	0.0913383	0.532516	0.0989575	0.498734	-0.0237768	0.871177	-0.565574	2.28948e-05	-0.820318	5.49191e-13	-0.302227	0.0348059	0.889975	1.21237e-17	0.479934	0.000483731	0.566249	2.22746e-05	-0.39081	0.00549636
MTCL1	darkgreen	0.205604	0.156404	-0.514716	0.000154453	0.813235	1.25326e-12	-0.184679	0.203964	-0.574903	1.55766e-05	0.197884	0.172897	0.24951	0.0838196	-0.100794	0.490757	-0.450449	0.00116311	0.104524	0.474768	-0.00687747	0.962593	-0.176219	0.225821	0.637391	8.44142e-07	0.825363	2.9839e-13	0.33991	0.0168679	-0.846281	1.89986e-14	-0.402939	0.00409765	-0.597171	5.91283e-06	0.319008	0.0254741
ALDH1L1	darkgreen	-0.389941	0.00561096	0.0417858	0.775587	-0.523268	0.000114424	0.429426	0.00207632	0.437003	0.00169208	-0.338871	0.017228	-0.406867	0.00371721	0.161393	0.267917	0.358883	0.0113314	-0.189081	0.1932	-0.140651	0.335074	0.0288606	0.843945	-0.276351	0.0545892	-0.543468	5.45203e-05	-0.458582	0.000920221	0.830672	1.53725e-13	0.287098	0.0454863	0.326186	0.0221776	-0.52943	9.17185e-05
SHISA5	darkgreen	0.141062	0.33365	0.366335	0.0096303	-0.173541	0.233065	0.0391357	0.789484	0.24989	0.0833337	0.07129	0.626423	0.216376	0.135363	-0.206977	0.153597	0.137778	0.345137	0.376302	0.00770238	0.387366	0.00596267	-0.281393	0.0501507	-0.686495	5.16868e-08	-0.742943	9.80703e-10	0.165461	0.255882	0.784929	2.46688e-11	0.822817	4.06915e-13	0.688241	4.63383e-08	-0.0285282	0.84572
MIB2	darkgreen	-0.251011	0.0819128	0.53167	8.45424e-05	-0.641504	6.80842e-07	-0.020501	0.888805	0.45086	0.00114958	-0.057358	0.695455	0.0428403	0.770077	0.0856958	0.558236	0.307457	0.0316352	-0.00676458	0.963207	0.00673746	0.963354	0.106181	0.467757	-0.493401	0.000315419	-0.737675	1.48104e-09	-0.197995	0.172652	0.74195	1.06074e-09	0.317759	0.0260873	0.554821	3.51868e-05	-0.212447	0.142778
TMEM9	darkgreen	-0.384963	0.00630817	0.141447	0.332318	-0.522431	0.000117874	0.484432	0.000420168	0.377524	0.0074908	-0.342468	0.0160083	-0.335318	0.0185092	0.223214	0.12315	0.219913	0.128937	-0.0445188	0.761328	-0.033257	0.820539	-0.255128	0.0768605	-0.319578	0.0251979	-0.476899	0.000531401	-0.427011	0.00221412	0.794866	9.13911e-12	0.345224	0.0151242	0.23224	0.108328	-0.600008	5.19913e-06
RBM14-RBM4	darkgreen	-0.160359	0.271036	0.361055	0.0108109	-0.509677	0.000183635	0.0746282	0.610316	0.409022	0.003522	-0.0248177	0.865588	0.00325875	0.982271	-0.0261445	0.858474	0.249743	0.0835212	0.163059	0.262944	0.240875	0.0954654	-0.130959	0.369764	-0.535685	7.29512e-05	-0.844455	2.455e-14	-0.108047	0.459923	0.91828	1.53869e-20	0.653477	3.57446e-07	0.724049	4.11691e-09	-0.190203	0.190522
ACACB	darkgreen	-0.298578	0.0371703	0.513627	0.000160375	-0.749068	5.99655e-10	0.256578	0.0751407	0.587756	8.98402e-06	-0.161557	0.267425	-0.226071	0.118301	0.17046	0.241594	0.387795	0.00590281	-0.160736	0.269898	-0.104936	0.473022	0.0364871	0.803439	-0.481707	0.00045771	-0.825004	3.11818e-13	-0.371062	0.00866948	0.870254	4.66116e-16	0.363037	0.0103539	0.530168	8.92945e-05	-0.399266	0.00448379
TRIM35	darkgreen	-0.199802	0.168688	0.563007	2.54027e-05	-0.622511	1.79072e-06	-0.0729069	0.618599	0.463361	0.00079974	-0.0469724	0.748593	0.0459702	0.753787	-0.011969	0.934946	0.279137	0.0520988	0.011882	0.935418	0.176326	0.225536	-0.0537972	0.713526	-0.471485	0.000627023	-0.772874	7.68898e-11	-0.213565	0.140637	0.850065	1.10505e-14	0.488036	0.000374796	0.556292	3.32064e-05	-0.335518	0.0184349
GSTM2	darkgreen	-0.40821	0.00359449	-0.00643254	0.965011	-0.441795	0.00148305	0.392803	0.00524125	0.496156	0.000288364	-0.287705	0.0450111	-0.34252	0.0159912	0.0931435	0.524412	0.262527	0.0684009	-0.158344	0.277184	-0.134102	0.358286	0.0141889	0.922915	-0.260489	0.0706528	-0.595388	6.40692e-06	-0.352833	0.0128963	0.82212	4.42634e-13	0.33386	0.0190579	0.295404	0.0393334	-0.453994	0.00105096
TMEM147	darkgreen	-0.148695	0.307882	0.361841	0.0106276	-0.54205	5.75225e-05	0.279908	0.051426	0.437456	0.00167124	-0.203047	0.161734	-0.108602	0.457608	-0.00150696	0.991801	0.337171	0.0178315	0.0638796	0.662794	0.143642	0.324792	-0.124396	0.394433	-0.628196	1.34983e-06	-0.761142	2.17942e-10	-0.224997	0.120107	0.920852	7.46993e-21	0.634476	9.81251e-07	0.618785	2.14869e-06	-0.38194	0.00676758
MAF1	darkgreen	-0.328863	0.0210436	0.201286	0.165481	-0.48576	0.000402901	0.295366	0.0393594	0.451133	0.00114068	-0.200432	0.167321	-0.198502	0.171533	0.0827885	0.571713	0.264209	0.0665842	0.0664592	0.65004	0.147229	0.31273	-0.164916	0.257473	-0.397439	0.00468751	-0.674259	1.08896e-07	-0.299331	0.0366719	0.929213	5.94803e-22	0.548037	4.57985e-05	0.469097	0.000673926	-0.478075	0.000512442
SMDT1	darkgreen	-0.164149	0.259724	0.362387	0.0105017	-0.557218	3.2014e-05	0.255018	0.0769928	0.395934	0.00486144	-0.192378	0.185407	-0.144036	0.323453	0.00345187	0.98122	0.289864	0.0433553	0.164805	0.257798	0.217242	0.133767	-0.0460819	0.753207	-0.601383	4.88259e-06	-0.729858	2.68244e-09	-0.247959	0.0858243	0.900123	1.3997e-18	0.593387	7.00657e-06	0.664227	1.95539e-07	-0.336876	0.0179378
URM1	darkgreen	-0.491864	0.000331489	0.267644	0.0629953	-0.626305	1.48379e-06	0.404751	0.00391815	0.521173	0.000123241	-0.290206	0.0430979	-0.254948	0.0770761	0.190525	0.189757	0.328808	0.0210667	-0.0838794	0.566638	-0.0830955	0.570282	-0.078962	0.589674	-0.195157	0.179016	-0.658242	2.7439e-07	-0.424333	0.00237632	0.884722	3.4177e-17	0.322438	0.023851	0.356218	0.0119995	-0.533061	8.03496e-05
HSD17B10	darkgreen	-0.184733	0.203829	0.417107	0.0028677	-0.595123	6.4835e-06	0.240131	0.0965243	0.437581	0.00166553	-0.205309	0.157013	-0.112592	0.44115	0.000952116	0.99482	0.343373	0.0157132	0.0871972	0.551336	0.128478	0.378976	-0.051615	0.724679	-0.666727	1.69346e-07	-0.809332	1.94574e-12	-0.243854	0.0913137	0.943199	3.93843e-24	0.589946	8.16045e-06	0.681406	7.07702e-08	-0.340083	0.0168086
YIF1A	darkgreen	-0.252733	0.0797697	0.301577	0.0352177	-0.576985	1.42704e-05	0.323123	0.0235372	0.475622	0.000552675	-0.246543	0.0876886	-0.301659	0.0351654	0.11702	0.423276	0.356884	0.0118294	-0.00330792	0.982003	0.0760609	0.603458	0.0141467	0.923143	-0.544821	5.17924e-05	-0.666939	1.6729e-07	-0.352423	0.0130088	0.907511	2.50027e-19	0.490593	0.000345338	0.460815	0.000862042	-0.493162	0.000317874
B3GNT1	darkgreen	-0.297188	0.0381055	0.493081	0.000318703	-0.680136	7.647e-08	0.149764	0.304378	0.575564	1.51501e-05	0.000683837	0.996279	-0.128592	0.378549	0.222129	0.12503	0.357649	0.0116367	0.0524527	0.720391	0.0712094	0.626814	0.091274	0.532806	-0.325677	0.0223989	-0.778644	4.50206e-11	-0.272481	0.0582066	0.860767	2.19457e-15	0.406803	0.00372323	0.476402	0.000539582	-0.349156	0.0139352
KRT80	darkgreen	-0.350017	0.0136856	0.533844	7.80748e-05	-0.695806	2.86081e-08	0.192918	0.184152	0.504821	0.000216416	-0.20892	0.149687	-0.166348	0.253306	0.05074	0.729167	0.351054	0.0133905	-0.0049443	0.973103	0.0219871	0.8808	0.0728711	0.618772	-0.405507	0.00384527	-0.754644	3.78469e-10	-0.334246	0.0189111	0.862012	1.80254e-15	0.383732	0.00649186	0.595896	6.26241e-06	-0.363125	0.0103339
TRIM29	darkgreen	-0.319492	0.0252397	0.251506	0.081293	-0.601664	4.82009e-06	0.414323	0.00307978	0.479059	0.000497062	-0.255513	0.0764013	-0.351718	0.0132043	0.187783	0.196331	0.249478	0.0838604	-0.0974446	0.505353	-0.040118	0.784326	0.0539306	0.712846	-0.409727	0.00346015	-0.589101	8.46959e-06	-0.428025	0.00215528	0.866486	8.74788e-16	0.372364	0.00841993	0.357528	0.011667	-0.545651	5.01796e-05
HBA1	darkgreen	-0.30471	0.0332695	0.160847	0.269562	-0.600764	5.02285e-06	0.314348	0.0278263	0.439117	0.00159682	-0.095133	0.515552	-0.108419	0.458371	-0.0718188	0.62386	0.279781	0.0515361	0.0411564	0.778882	-0.0259269	0.85964	0.00137014	0.992545	-0.551545	3.9992e-05	-0.756224	3.31455e-10	-0.196926	0.175029	0.842743	3.11232e-14	0.509112	0.000187202	0.630893	1.17809e-06	-0.24528	0.0893768
CTTN	darkgreen	-0.332263	0.0196746	0.0522053	0.721656	-0.529658	9.09652e-05	0.472239	0.000612844	0.373317	0.00824105	-0.187974	0.195867	-0.151469	0.298841	0.127614	0.382219	0.249917	0.0832993	0.0975281	0.504986	0.0305497	0.834935	-0.0843792	0.56432	-0.380641	0.00697367	-0.636737	8.73264e-07	-0.219408	0.12984	0.742955	9.79797e-10	0.435759	0.00175047	0.654231	3.42908e-07	-0.220098	0.128608
PHC2	darkgreen	-0.439887	0.00156333	0.215919	0.13621	-0.534568	7.60225e-05	0.266491	0.0641832	0.471636	0.000624169	-0.197381	0.174015	-0.152891	0.294273	0.0899601	0.538744	0.262586	0.0683364	-0.0274477	0.851497	-0.0478858	0.743868	-0.0593901	0.685216	-0.252767	0.0797274	-0.699858	2.19611e-08	-0.28816	0.0446579	0.899666	1.55012e-18	0.412163	0.0032537	0.424907	0.00234068	-0.422963	0.00246331
SYNJ2BP	darkgreen	0.308111	0.0312557	-0.412267	0.00324515	0.629192	1.28381e-06	-0.292536	0.0413753	-0.51376	0.000159642	0.153009	0.293898	0.0967996	0.508188	-0.0648456	0.658006	-0.306303	0.0323134	0.189174	0.192976	0.119351	0.414036	0.0868272	0.553033	0.424085	0.00239184	0.873283	2.77008e-16	0.233266	0.106734	-0.900692	1.23176e-18	-0.46568	0.000746536	-0.575056	1.5477e-05	0.296519	0.0385621
GOLGA2	darkgreen	-0.327645	0.0215533	0.36162	0.0106787	-0.72131	5.01963e-09	0.286519	0.0459428	0.55013	4.22469e-05	-0.227271	0.116309	-0.270977	0.059663	0.129351	0.375717	0.409228	0.00350391	0.00277618	0.984896	0.0352346	0.810059	-0.00846695	0.953956	-0.502891	0.000230858	-0.744161	8.90275e-10	-0.420287	0.00264135	0.911794	8.60986e-20	0.412473	0.00322824	0.534454	7.63416e-05	-0.454152	0.00104621
PDLIM4	darkgreen	-0.490562	0.000345688	0.11178	0.444473	-0.669462	1.44469e-07	0.286304	0.0461134	0.413989	0.00310615	-0.172495	0.235937	-0.206834	0.153887	0.213796	0.140198	0.328472	0.0212061	-0.141565	0.331911	-0.211356	0.14489	-0.0799794	0.584874	-0.352636	0.0129503	-0.713149	8.9396e-09	-0.300735	0.0357572	0.814891	1.03669e-12	0.291601	0.0420595	0.506692	0.000203198	-0.278224	0.0529044
LOC100996756	darkgreen	-0.287192	0.0454119	0.674037	1.10346e-07	-0.707876	1.28453e-08	0.128458	0.379053	0.431714	0.00195287	-0.105447	0.470856	-0.074566	0.610614	0.0107258	0.941691	0.270688	0.0599464	-0.249805	0.0834413	-0.168216	0.247938	0.12629	0.387217	-0.324672	0.0228412	-0.780501	3.77643e-11	-0.283514	0.0483729	0.811167	1.58427e-12	0.290469	0.0429007	0.508673	0.000190018	-0.297199	0.0380977
LRWD1	darkgreen	-0.18049	0.214592	0.513473	0.000161231	-0.625653	1.53278e-06	-0.0281929	0.847512	0.536755	7.01185e-05	0.0893401	0.541558	-0.0112441	0.938879	0.0504251	0.730784	0.329975	0.0205874	0.0678676	0.643118	0.125267	0.391103	-0.110902	0.44808	-0.466467	0.000729217	-0.855757	4.75335e-15	-0.12658	0.386119	0.849307	1.23326e-14	0.488922	0.000364338	0.455401	0.0010092	-0.205603	0.156407
KREMEN1	darkgreen	-0.268576	0.0620489	0.433029	0.00188491	-0.578096	1.36157e-05	0.200886	0.166342	0.451359	0.00113336	-0.21191	0.143814	-0.0311571	0.831701	-0.0807034	0.581469	0.30044	0.0359479	-0.017101	0.907157	0.057503	0.694722	0.105062	0.472488	-0.407156	0.00369057	-0.827002	2.43714e-13	-0.219683	0.129348	0.892844	6.732e-18	0.520884	0.000124502	0.705105	1.54919e-08	-0.28449	0.0475725
SUN2	darkgreen	-0.066787	0.648426	0.383477	0.0065305	-0.469098	0.000673907	0.153418	0.292593	0.460229	0.000876977	-0.0901351	0.537951	-0.0884143	0.545772	0.0152324	0.917265	0.271767	0.0588943	0.185398	0.202177	0.320268	0.0248673	-0.185744	0.201321	-0.619313	2.09425e-06	-0.699674	2.22278e-08	-0.193285	0.183303	0.897285	2.61827e-18	0.661916	2.23075e-07	0.484593	0.000418037	-0.407401	0.00366806
LY6E	darkgreen	-0.0736331	0.615099	0.355145	0.0122778	-0.368592	0.00916064	0.146245	0.316009	0.392403	0.0052916	-0.0752502	0.607334	-0.140171	0.336744	-0.0586594	0.688891	0.208379	0.150768	0.202714	0.162439	0.278675	0.0525056	-0.234167	0.105349	-0.450942	0.00114689	-0.626057	1.5023e-06	-0.205818	0.155965	0.82738	2.3253e-13	0.576838	1.43592e-05	0.346704	0.0146669	-0.406289	0.00377117
PRPF8	darkgreen	-0.137519	0.346056	0.155722	0.285317	-0.268122	0.0625087	0.0823178	0.573908	0.396885	0.00475091	-0.126909	0.384873	-0.16616	0.25385	-0.06733	0.645757	0.267075	0.0635792	0.129697	0.374433	0.262993	0.0678932	-0.191116	0.188362	-0.379449	0.00716758	-0.606509	3.8534e-06	-0.153885	0.29111	0.808517	2.13036e-12	0.584376	1.04067e-05	0.33816	0.0174781	-0.344776	0.0152652
MANBAL	darkgreen	-0.198556	0.171415	0.393916	0.00510334	-0.591717	7.54631e-06	0.451074	0.0011426	0.476779	0.000533363	-0.326949	0.0218494	-0.168227	0.247908	0.0719275	0.623333	0.333959	0.0190203	-0.00246765	0.986574	0.0480085	0.743235	-0.164664	0.258211	-0.59073	7.88293e-06	-0.710617	1.06498e-08	-0.321412	0.0243273	0.887637	1.93535e-17	0.543659	5.41282e-05	0.51891	0.000133454	-0.488546	0.000368747
CDC42EP4	darkgreen	-0.131253	0.368679	0.35126	0.0133323	-0.420826	0.0026046	0.0554612	0.705061	0.426084	0.00226913	-0.185093	0.202933	-0.0898956	0.539037	0.0223457	0.878871	0.244114	0.0909577	0.0344288	0.814326	0.202667	0.162537	-0.249982	0.0832164	-0.381672	0.00680966	-0.659698	2.52864e-07	-0.188021	0.195755	0.835548	8.19024e-14	0.541262	5.92563e-05	0.298409	0.037283	-0.410312	0.00340958
FAM107A	darkgreen	-0.153702	0.291691	0.33328	0.0192798	-0.485828	0.00040204	0.237498	0.100348	0.327677	0.0215399	-0.144604	0.321531	-0.00681168	0.96295	-0.0307523	0.833856	0.29198	0.0417809	0.137968	0.344467	0.12211	0.403246	-0.0709335	0.628154	-0.60229	4.68361e-06	-0.757816	2.897e-10	-0.151363	0.299183	0.867894	6.92912e-16	0.597681	5.77825e-06	0.739269	1.30872e-09	-0.22121	0.126639
AKAP1	darkgreen	-0.247013	0.087066	0.0849893	0.561497	-0.405021	0.00389199	0.387553	0.00593649	0.433737	0.00184917	-0.216573	0.134999	-0.193035	0.183881	0.0328793	0.822544	0.245485	0.0891007	0.0743967	0.611427	0.0388033	0.791232	0.0167356	0.909133	-0.573991	1.61823e-05	-0.690914	3.91428e-08	-0.250312	0.0827967	0.831203	1.43678e-13	0.503353	0.000227317	0.640741	7.08727e-07	-0.298416	0.0372781
VPS51	darkgreen	-0.192979	0.18401	0.193814	0.182083	-0.440378	0.0015423	0.334891	0.0186685	0.339688	0.0169442	-0.1941	0.181427	-0.209199	0.149132	0.0589349	0.687504	0.253215	0.0791769	0.170817	0.240597	0.174825	0.229571	-0.137231	0.347077	-0.539807	6.25824e-05	-0.581983	1.15366e-05	-0.267586	0.0630546	0.848301	1.42526e-14	0.55244	3.86228e-05	0.484137	0.000424095	-0.417811	0.00281616
RPL18AP16	darkgreen	-0.16151	0.267567	0.371749	0.00853703	-0.531102	8.63141e-05	0.347875	0.0143134	0.38545	0.00623677	-0.22686	0.116989	-0.183462	0.207011	0.0469198	0.748865	0.206905	0.153743	0.165947	0.254467	0.229659	0.112419	-0.104365	0.475447	-0.483435	0.000433562	-0.60895	3.43757e-06	-0.34462	0.0153143	0.877142	1.39986e-16	0.527639	9.78517e-05	0.450446	0.00116322	-0.537058	6.93363e-05
TMEM216	darkgreen	-0.0825079	0.573021	0.553721	3.67375e-05	-0.629346	1.27389e-06	-0.00347532	0.981092	0.468177	0.000692831	-0.0345602	0.813629	0.0754545	0.606356	-0.0593166	0.685585	0.299131	0.0368035	0.0513336	0.726121	0.200842	0.166436	-0.0443864	0.762017	-0.634256	9.92349e-07	-0.85669	4.12554e-15	-0.135316	0.353911	0.88973	1.27409e-17	0.582921	1.10808e-05	0.66124	2.31786e-07	-0.230899	0.110439
POFUT2	darkgreen	-0.442556	0.00145206	0.145727	0.317744	-0.595103	6.48925e-06	0.267663	0.0629768	0.375433	0.00785586	-0.121643	0.405062	-0.144714	0.321159	0.180384	0.214866	0.281157	0.0503518	-0.0691646	0.63677	-0.0879832	0.54774	-0.133545	0.360302	-0.288743	0.044209	-0.665297	1.83893e-07	-0.252109	0.0805406	0.753337	4.2205e-10	0.26844	0.0621863	0.491454	0.000335898	-0.241356	0.0947855
DNPEP	darkgreen	-0.164425	0.258913	0.425996	0.00227438	-0.553145	3.75749e-05	0.0957393	0.512867	0.554745	3.52916e-05	-0.0672082	0.646355	-0.183449	0.207044	0.0918302	0.530302	0.363325	0.0102889	0.0721055	0.622472	0.154314	0.28975	-0.198378	0.171808	-0.358712	0.0113733	-0.695263	2.9629e-08	-0.271457	0.0591954	0.837955	5.95651e-14	0.441747	0.00148502	0.269815	0.0608085	-0.42128	0.00257402
C16orf89	darkgreen	-0.416298	0.002928	0.47347	0.000590302	-0.671647	1.271e-07	0.37587	0.00777832	0.497491	0.000276028	-0.352157	0.0130821	-0.270369	0.0602602	0.151352	0.299219	0.294187	0.0401894	-0.14053	0.335496	-0.130825	0.370255	0.0119897	0.934834	-0.39134	0.0054275	-0.765389	1.50512e-10	-0.382176	0.00673075	0.871105	4.03271e-16	0.325745	0.0223693	0.5309	8.69499e-05	-0.392227	0.00531387
PPRC1	darkgreen	-0.0970418	0.507123	0.39335	0.00517301	-0.507074	0.000200595	-0.0885211	0.545285	0.422409	0.00249927	0.171256	0.239369	-0.126891	0.384941	0.0297134	0.839394	0.361351	0.0107415	0.113199	0.438675	0.115726	0.428456	-0.150918	0.300622	-0.405641	0.00383248	-0.714959	7.8792e-09	-0.135044	0.354886	0.775332	6.13327e-11	0.417975	0.00280432	0.339783	0.0169115	-0.20157	0.164872
CLUH	darkgreen	-0.463097	0.000805998	0.0595554	0.684385	-0.556086	3.3478e-05	0.436052	0.00173655	0.361253	0.0107643	-0.299952	0.0362653	-0.14115	0.333346	0.123522	0.397788	0.217151	0.133934	-0.0702814	0.631324	-0.103403	0.479546	-0.212943	0.141826	-0.270398	0.0602315	-0.614688	2.61836e-06	-0.298829	0.0370039	0.787768	1.86754e-11	0.345356	0.015083	0.509984	0.000181725	-0.366819	0.00952776
MEA1	darkgreen	-0.176258	0.225718	0.412575	0.00321988	-0.494008	0.000309271	0.223547	0.122577	0.370566	0.00876632	-0.138244	0.343495	0.0329768	0.822026	-0.0639765	0.662313	0.258787	0.072579	0.142892	0.327354	0.139545	0.338925	0.00219252	0.988071	-0.530888	8.69864e-05	-0.773804	7.06081e-11	-0.167618	0.249648	0.878912	1.01555e-16	0.573775	1.63294e-05	0.709577	1.14375e-08	-0.28178	0.0498217
ALKBH7	darkgreen	-0.361127	0.010794	0.166291	0.253471	-0.512841	0.000164776	0.104923	0.473075	0.579475	1.28414e-05	-0.239116	0.0979843	-0.370205	0.00883727	0.11355	0.437249	0.504929	0.000215631	-0.164125	0.259794	-0.0321613	0.826358	0.0491105	0.737549	-0.295851	0.0390224	-0.578775	1.32293e-05	-0.40292	0.00409959	0.798364	6.35958e-12	0.300135	0.0361457	0.160537	0.2705	-0.544336	5.27547e-05
TCIRG1	darkgreen	-0.238678	0.0986196	-0.167195	0.250863	-0.117471	0.42148	0.320785	0.024622	0.209152	0.149224	-0.0283105	0.846883	-0.0352741	0.80985	0.0294287	0.840912	0.0903661	0.536906	0.217207	0.133832	0.148533	0.308413	-0.427973	0.00215825	-0.148389	0.30889	-0.384287	0.00640859	-0.0579205	0.692615	0.605608	4.0182e-06	0.469373	0.000668365	0.290139	0.0431479	-0.230547	0.111
HBB	darkgreen	-0.0872078	0.551287	0.336334	0.0181351	-0.598844	5.48172e-06	0.079059	0.589216	0.332029	0.0197662	0.0858927	0.557329	0.115953	0.427545	-0.241974	0.0939175	0.225516	0.119233	0.0592475	0.685932	0.0551904	0.706436	-0.0508863	0.728416	-0.606745	3.81118e-06	-0.804133	3.44281e-12	-0.0370717	0.800354	0.774222	6.79483e-11	0.590193	8.07198e-06	0.690808	3.94052e-08	-0.10672	0.465486
MIR6743	darkgreen	-0.10252	0.483325	0.402372	0.00415525	-0.51533	0.000151203	0.219347	0.12995	0.353148	0.0128105	-0.0657996	0.653292	-0.0241208	0.869329	0.0439525	0.764277	0.223494	0.122668	0.203138	0.161543	0.236465	0.101878	-0.140682	0.334968	-0.592625	7.2482e-06	-0.728325	3.00657e-09	-0.165013	0.257189	0.88064	7.39022e-17	0.635228	9.44014e-07	0.647253	5.01423e-07	-0.306423	0.0322419
NMRAL1	darkgreen	-0.297203	0.038095	0.279708	0.0516001	-0.534818	7.53235e-05	0.259582	0.0716741	0.399264	0.00448404	-0.111699	0.444804	-0.0702086	0.631679	0.0518059	0.723701	0.258972	0.0723681	0.142504	0.328682	0.146235	0.316044	-0.185857	0.201042	-0.457449	0.000951073	-0.743279	9.54925e-10	-0.1982	0.1722	0.894775	4.4885e-18	0.57579	1.50074e-05	0.654891	3.30628e-07	-0.294467	0.0399909
RP11-251G23.5	darkgreen	0.156483	0.28294	-0.36129	0.0107558	0.557688	3.14225e-05	-0.202658	0.162558	-0.495281	0.000296725	0.0964862	0.509569	0.167347	0.250427	0.0394385	0.787893	-0.31883	0.0255606	-0.0127345	0.930796	0.00403317	0.978058	-0.0951919	0.515291	0.568395	2.04033e-05	0.803018	3.88242e-12	0.253263	0.0791185	-0.839067	5.13223e-14	-0.447178	0.00127596	-0.568696	2.01521e-05	0.290909	0.0425719
ASB6	darkgreen	-0.19325	0.183383	0.511878	0.000170319	-0.674687	1.06158e-07	0.0797104	0.586141	0.548786	4.44977e-05	0.00915819	0.950202	-0.0509082	0.728303	0.0920316	0.529397	0.394786	0.00499781	-0.00566774	0.969169	0.0446223	0.760789	-0.104822	0.473502	-0.571614	1.78657e-05	-0.872035	3.43796e-16	-0.202312	0.163291	0.88424	3.74906e-17	0.453941	0.00105257	0.553429	3.71588e-05	-0.249056	0.0844019
CTD-2528L19.6	darkgreen	0.353013	0.0128472	-0.376312	0.00770059	0.69018	4.1006e-08	-0.365326	0.00984682	-0.618851	2.14185e-06	0.311546	0.0293261	0.34098	0.0165035	-0.164149	0.259723	-0.356191	0.0120063	0.0986481	0.500084	0.0410641	0.779365	0.0441294	0.763355	0.441567	0.00149244	0.694956	3.02224e-08	0.45372	0.00105928	-0.860096	2.43825e-15	-0.329532	0.0207681	-0.350536	0.0135373	0.529378	9.18928e-05
SMARCC2	darkgreen	-0.269656	0.0609668	0.230016	0.111846	-0.53605	7.19737e-05	0.235889	0.102739	0.467311	0.000711055	-0.154503	0.289154	-0.169582	0.244062	0.101563	0.48744	0.273374	0.0573549	-0.0054133	0.970553	0.0307661	0.833783	-0.00697007	0.96209	-0.527058	9.99195e-05	-0.756516	3.23399e-10	-0.274426	0.056365	0.912424	7.32581e-20	0.495214	0.000297372	0.584375	1.04068e-05	-0.350094	0.0136637
RUSC1	darkgreen	-0.234617	0.104662	0.408343	0.00358251	-0.573436	1.65621e-05	0.197805	0.173074	0.488264	0.000372082	-0.163148	0.262679	0.0125891	0.931584	-0.0832631	0.569502	0.25692	0.0747394	-0.0179833	0.90239	0.0762889	0.602369	-0.0172079	0.906579	-0.501091	0.000245103	-0.819507	6.04683e-13	-0.181932	0.210891	0.88085	7.10642e-17	0.572693	1.7083e-05	0.660924	2.3596e-07	-0.286575	0.0458986
PREB	darkgreen	-0.246728	0.0874432	0.358129	0.011517	-0.498187	0.000269791	0.199805	0.16868	0.41441	0.00307297	-0.145086	0.319903	-0.163747	0.260908	-0.0334194	0.819677	0.251057	0.0818552	-0.0629354	0.667486	0.0807059	0.581457	-0.19478	0.179873	-0.41411	0.00309658	-0.731135	2.43776e-09	-0.244051	0.0910441	0.907599	2.44685e-19	0.523134	0.000114967	0.469953	0.000656775	-0.411586	0.00330162
LRRC8A	darkgreen	-0.209435	0.148663	0.365095	0.00989696	-0.584188	1.04913e-05	0.359042	0.0112924	0.398299	0.00459066	-0.13786	0.344849	-0.0823102	0.573944	-0.000863298	0.995303	0.269198	0.0614239	0.107594	0.46182	0.0706552	0.629506	-0.0464729	0.75118	-0.54192	5.78063e-05	-0.7806	3.74116e-11	-0.258531	0.0728723	0.905788	3.78362e-19	0.536013	7.20723e-05	0.718372	6.19322e-09	-0.337813	0.0176015
VKORC1	darkgreen	-0.148727	0.307776	0.399999	0.00440436	-0.592575	7.26433e-06	0.181977	0.210777	0.525364	0.000106181	-0.22353	0.122607	-0.144629	0.321444	0.0173136	0.906008	0.411017	0.00334944	0.0882672	0.546443	0.176208	0.225851	-0.113684	0.436706	-0.729656	2.72313e-09	-0.786557	2.10419e-11	-0.274666	0.0561407	0.931048	3.27516e-22	0.580069	1.25206e-05	0.544117	5.31956e-05	-0.409092	0.00351589
MPST	darkgreen	-0.459003	0.000908995	0.275326	0.0555292	-0.685404	5.53185e-08	0.358621	0.0113956	0.522675	0.000116856	-0.239176	0.0978985	-0.323324	0.0234463	0.221404	0.126299	0.379563	0.00714894	-0.143055	0.326796	-0.146291	0.315856	-0.0475681	0.745511	-0.376272	0.00770751	-0.706871	1.37516e-08	-0.451499	0.00112884	0.89826	2.11609e-18	0.273156	0.0575621	0.358269	0.0114825	-0.506153	0.000206932
SOX10	darkgreen	-0.203219	0.161371	0.372007	0.00848773	-0.646025	5.35579e-07	0.353082	0.0128285	0.445434	0.00134003	-0.177048	0.22361	-0.106012	0.468467	0.0965043	0.509489	0.28166	0.0499236	0.0162738	0.91163	0.0453068	0.757231	0.0219559	0.880969	-0.586178	9.62394e-06	-0.775841	5.85052e-11	-0.28865	0.04428	0.901362	1.05859e-18	0.521224	0.000123019	0.715865	7.39348e-09	-0.37186	0.00851569
STUB1	darkgreen	-0.359815	0.0111054	0.223957	0.121874	-0.561089	2.74389e-05	0.409687	0.00346367	0.472893	0.00060077	-0.285833	0.0464889	-0.323372	0.0234243	0.141076	0.333601	0.30145	0.0352987	0.0267821	0.855059	0.0792823	0.588161	-0.0285059	0.845839	-0.403088	0.00408257	-0.608682	3.48111e-06	-0.421922	0.00253125	0.911063	1.03677e-19	0.45572	0.000999948	0.426651	0.0022353	-0.571054	1.82851e-05
MLX	darkgreen	0.142341	0.329239	0.502062	0.000237324	-0.535383	7.37721e-05	0.110354	0.45034	0.326611	0.021994	0.0301822	0.836894	0.0475383	0.745665	-0.0656862	0.653851	0.23618	0.102304	0.214852	0.138204	0.294871	0.0397062	-0.124052	0.395751	-0.766102	1.41331e-10	-0.771331	8.84952e-11	-0.0940137	0.520527	0.843651	2.74514e-14	0.696445	2.74474e-08	0.652134	3.84775e-07	-0.258827	0.0725331
PLCD1	darkgreen	-0.293233	0.040871	0.425989	0.00227484	-0.685126	5.62815e-08	0.340529	0.0166564	0.593338	7.02191e-06	-0.154916	0.28785	-0.305838	0.0325897	0.201552	0.164911	0.352223	0.0130639	-0.24339	0.0919509	-0.121524	0.405525	0.000959264	0.994781	-0.48778	0.000377863	-0.798727	6.12255e-12	-0.38978	0.00563234	0.925077	2.15711e-21	0.378701	0.00729168	0.419598	0.00268905	-0.478905	0.000499437
SERPINF1	darkgreen	0.180511	0.214538	0.45018	0.00117203	-0.194414	0.180707	0.0209944	0.886146	0.236203	0.102269	-0.0224333	0.878399	0.188072	0.195631	-0.340397	0.0167013	0.0627721	0.668299	0.358896	0.0113283	0.475757	0.00055039	-0.362844	0.0103977	-0.515613	0.000149726	-0.652343	3.80398e-07	0.0630906	0.666714	0.755631	3.48421e-10	0.817033	8.08787e-13	0.441975	0.00147565	-0.21986	0.129032
ACVRL1	darkgreen	-0.23425	0.105221	0.291463	0.0421611	-0.482185	0.000450905	0.0775231	0.596493	0.506389	0.000205291	0.0626607	0.668853	-0.0361896	0.80501	0.219174	0.13026	0.29194	0.0418103	0.168383	0.247462	0.173972	0.23189	-0.0399985	0.784952	-0.396062	0.00484638	-0.721399	4.98758e-09	-0.160422	0.270848	0.809285	1.95607e-12	0.523709	0.000112643	0.493407	0.000315353	-0.320244	0.0248787
MIR6748	darkgreen	-0.158889	0.275512	0.418763	0.00274783	-0.544995	5.14489e-05	0.199839	0.168607	0.393865	0.00510962	-0.183578	0.206721	-0.00841148	0.954257	0.0123696	0.932774	0.203628	0.160511	0.0476502	0.745086	0.158234	0.277522	-0.209688	0.148162	-0.611271	3.08107e-06	-0.808249	2.19457e-12	-0.199526	0.169288	0.928854	6.67294e-22	0.623258	1.72601e-06	0.619604	2.06477e-06	-0.34606	0.0148644
KIAA1522	darkgreen	-0.415378	0.00299782	0.298109	0.0374839	-0.644624	5.77167e-07	0.490586	0.000345416	0.497574	0.000275274	-0.367785	0.00932632	-0.325129	0.0226391	0.162677	0.264079	0.337307	0.0177824	-0.0640244	0.662075	-0.0780248	0.594111	-0.00114841	0.993752	-0.494878	0.000300643	-0.708242	1.25297e-08	-0.430094	0.00203955	0.924926	2.2582e-21	0.394771	0.00499957	0.514697	0.000154554	-0.51028	0.000179893
BCAP31	darkgreen	-0.289606	0.0435505	0.205376	0.156874	-0.476508	0.000537827	0.294856	0.0397167	0.46198	0.000833015	-0.242059	0.0937979	-0.221088	0.126854	-0.0248052	0.865655	0.335128	0.0185798	0.0750586	0.608252	0.14341	0.325584	-0.172473	0.235998	-0.393522	0.00515178	-0.69866	2.37564e-08	-0.312122	0.0290126	0.919459	1.1081e-20	0.548869	4.43546e-05	0.437269	0.0016798	-0.473413	0.000591337
MKNK2	darkgreen	-0.171301	0.239247	0.190734	0.189264	-0.396362	0.00481142	0.266027	0.064665	0.267758	0.0628795	-0.0798998	0.585249	0.0765341	0.601199	-0.0538564	0.713224	0.146217	0.316104	0.211109	0.14537	0.193411	0.183011	-0.159736	0.272928	-0.436153	0.00173178	-0.693721	3.27223e-08	-0.0480959	0.742783	0.753853	4.04307e-10	0.601108	4.94449e-06	0.777756	4.89349e-11	-0.125396	0.390613
PRKD2	darkgreen	-0.0818	0.576328	0.154753	0.288364	-0.209914	0.147714	0.0959115	0.512106	0.321344	0.024359	0.0265589	0.856254	0.0923748	0.527856	-0.137036	0.347768	0.152881	0.294306	0.260264	0.0709058	0.34817	0.0142256	-0.271409	0.0592412	-0.509275	0.000186165	-0.728807	2.90095e-09	0.0504705	0.730551	0.857427	3.686e-15	0.768981	1.09379e-10	0.611509	3.04658e-06	-0.15005	0.303443
MTCH1	darkgreen	-0.168839	0.246168	0.266879	0.0637812	-0.524763	0.000108485	0.305253	0.0329408	0.343515	0.0156673	-0.109887	0.452271	0.0106489	0.942108	-0.0458037	0.754651	0.225932	0.118534	0.171589	0.238445	0.174534	0.23036	-0.0467953	0.74951	-0.442851	0.00144019	-0.732287	2.23535e-09	-0.145983	0.316887	0.802863	3.9478e-12	0.594181	6.76264e-06	0.73711	1.54703e-09	-0.247794	0.0860407
DEF8	darkgreen	-0.0772929	0.597587	0.213408	0.140937	-0.230475	0.111114	0.114214	0.434554	0.305453	0.0328202	-0.0900195	0.538475	-0.101885	0.486052	0.0330482	0.821647	0.170515	0.241439	0.365547	0.009799	0.401491	0.00424628	-0.294949	0.0396516	-0.416353	0.00292387	-0.532573	8.1798e-05	-0.0948309	0.516893	0.783311	2.88546e-11	0.62294	1.75326e-06	0.393326	0.00517605	-0.310246	0.0300445
ADIRF-AS1	darkgreen	-0.6924	3.56103e-08	-0.198669	0.171166	-0.744374	8.75325e-10	0.536801	6.99983e-05	0.432003	0.00193771	-0.445608	0.00133351	-0.470526	0.000645493	0.222422	0.12452	0.35338	0.0127478	-0.203965	0.159806	-0.314825	0.0275774	0.118984	0.415482	-0.0283195	0.846835	-0.453402	0.00106899	-0.539075	6.43188e-05	0.666376	1.7282e-07	0.0181178	0.901663	0.306654	0.0321059	-0.448903	0.00121528
UBL4A	darkgreen	-0.251038	0.0818796	0.49277	0.000321928	-0.68543	5.5231e-08	0.155502	0.286008	0.535651	7.30445e-05	-0.114129	0.4349	-0.213046	0.141627	0.0268917	0.854472	0.371095	0.00866298	-0.0641379	0.661512	0.0388264	0.791111	0.156863	0.28176	-0.524523	0.000109422	-0.812042	1.43515e-12	-0.304859	0.0331785	0.916021	2.84696e-20	0.453273	0.00107296	0.553765	3.66746e-05	-0.388322	0.00582997
HDDC3	darkgreen	-0.423066	0.00245668	0.476585	0.000536564	-0.753922	4.01985e-10	0.256286	0.0754846	0.580343	1.23748e-05	-0.285245	0.0469606	-0.267754	0.0628839	0.147467	0.311938	0.47942	0.000491529	-0.183485	0.206955	-0.096658	0.508812	0.0103462	0.943751	-0.407596	0.00365015	-0.816649	8.45736e-13	-0.412977	0.00318715	0.930873	3.46908e-22	0.363365	0.0102798	0.494489	0.000304473	-0.459002	0.00090903
COPRS	darkgreen	-0.255884	0.0759599	0.366535	0.00958786	-0.519637	0.000130093	0.189812	0.191453	0.332823	0.0194566	-0.107195	0.463492	0.0737229	0.614666	-0.00440957	0.976011	0.202013	0.163928	0.148023	0.310096	0.166589	0.252608	-0.150783	0.30106	-0.362657	0.0104402	-0.742614	1.00657e-09	-0.108081	0.459784	0.802492	4.10785e-12	0.549734	4.28993e-05	0.716835	6.90545e-09	-0.181951	0.210843
MRPL37	darkgreen	-0.310044	0.0301575	0.403939	0.00399773	-0.611413	3.06047e-06	0.275591	0.0552841	0.54942	4.34228e-05	-0.22483	0.12039	-0.353435	0.0127327	0.162875	0.263491	0.400635	0.00433634	0.0164247	0.910814	0.0332691	0.820475	-0.0657017	0.653775	-0.408192	0.00359612	-0.687117	4.97196e-08	-0.399598	0.00444769	0.880744	7.2477e-17	0.377789	0.00744555	0.25556	0.0763446	-0.544755	5.19222e-05
AGAP10	darkgreen	-0.348396	0.0141584	-0.0650934	0.65678	-0.36281	0.0104054	0.284819	0.0473054	0.367398	0.00940656	-0.124394	0.394441	-0.0595684	0.68432	0.0139648	0.924129	0.257945	0.0735467	0.0138003	0.925019	0.00296689	0.983858	-0.155817	0.285022	-0.396996	0.00473808	-0.740863	1.15544e-09	-0.0454237	0.756624	0.716189	7.22687e-09	0.467618	0.000704549	0.706748	1.38672e-08	0.0089737	0.951204
H2AFJ	darkgreen	-0.244094	0.0909856	0.300593	0.0358491	-0.654528	3.37339e-07	0.434452	0.00181371	0.395007	0.00497121	-0.259079	0.0722464	-0.217034	0.13415	0.130119	0.372867	0.297639	0.0377998	0.0172951	0.906108	0.0603209	0.680544	-0.0855021	0.559129	-0.509916	0.000182145	-0.671797	1.25982e-07	-0.363437	0.0102636	0.885684	2.83729e-17	0.481053	0.000467163	0.599812	5.24562e-06	-0.44287	0.00143942
MTX1	darkgreen	-0.400293	0.00437281	0.355653	0.0121452	-0.643616	6.08928e-07	0.267192	0.0634589	0.501319	0.000243257	-0.211224	0.145147	-0.145078	0.319928	0.0386231	0.79218	0.347448	0.0144414	0.0803355	0.583198	0.0730622	0.61785	-0.0122347	0.933506	-0.481936	0.000454443	-0.77072	9.35246e-11	-0.285731	0.0465704	0.927057	1.17532e-21	0.519563	0.000130433	0.574778	1.5658e-05	-0.40897	0.00352661
PARP15	darkgreen	0.44813	0.00124213	-0.498515	0.000266894	0.861402	1.98564e-15	-0.503289	0.000227811	-0.617062	2.33576e-06	0.501345	0.000243045	0.550549	4.15674e-05	-0.357108	0.0117727	-0.450067	0.00117582	0.2152	0.137551	0.144308	0.322531	-0.144821	0.320795	0.5161	0.000147211	0.693089	3.40745e-08	0.60858	3.49782e-06	-0.825185	3.0499e-13	-0.183604	0.206656	-0.440264	0.00154716	0.542803	5.59107e-05
MIR631	darkgreen	-0.440922	0.0015193	0.266704	0.0639626	-0.716807	6.91882e-09	0.376901	0.00759801	0.575756	1.50284e-05	-0.217041	0.134136	-0.273805	0.0569476	0.123716	0.397044	0.334181	0.018936	-0.0346412	0.813201	-0.0937454	0.521724	0.0443845	0.762027	-0.46665	0.00072525	-0.812531	1.35786e-12	-0.335365	0.0184918	0.892986	6.53596e-18	0.364918	0.00993556	0.528819	9.37701e-05	-0.318381	0.0257804
MIR4647	darkgreen	-0.329167	0.0209181	0.354321	0.0124952	-0.596493	6.09646e-06	0.424522	0.00236451	0.529096	9.28339e-05	-0.272606	0.0580864	-0.423392	0.00243579	0.13857	0.342345	0.362445	0.0104886	-0.115044	0.4312	-0.01927	0.895443	0.0837466	0.567255	-0.209787	0.147966	-0.553044	3.77227e-05	-0.518403	0.000135848	0.860165	2.41193e-15	0.335415	0.0184733	0.242351	0.0933909	-0.694067	3.20026e-08
DHX16	darkgreen	-0.254115	0.0780808	0.235894	0.102732	-0.418152	0.00279155	0.139162	0.340269	0.351308	0.0133189	-0.00467957	0.974543	0.0548173	0.708332	0.0359718	0.806161	0.203595	0.160582	0.113534	0.437312	0.0949483	0.516371	-0.25338	0.0789755	-0.404579	0.00393489	-0.845138	2.23133e-14	-0.02354	0.872449	0.882175	5.54739e-17	0.612801	2.86523e-06	0.678851	8.26731e-08	-0.116689	0.4246
NELFCD	darkgreen	-0.149386	0.305614	0.331443	0.0199976	-0.440937	0.0015187	0.175947	0.226551	0.354171	0.0125353	-0.124666	0.393398	-0.0359444	0.806306	-0.0277711	0.849767	0.270133	0.0604931	0.104321	0.47563	0.118589	0.417041	-0.0745878	0.610509	-0.634629	9.73574e-07	-0.825915	2.78804e-13	-0.0590855	0.686747	0.870885	4.18673e-16	0.6308	1.18366e-06	0.73932	1.30349e-09	-0.112984	0.439552
RASSF7	darkgreen	-0.330678	0.0203033	0.255611	0.0762847	-0.6074	3.69653e-06	0.372845	0.00832918	0.454642	0.00103156	-0.110638	0.449167	-0.138891	0.341217	0.176164	0.225969	0.279382	0.0518845	0.0304065	0.835699	-0.0665417	0.649634	-0.14528	0.319247	-0.548534	4.49319e-05	-0.806537	2.65007e-12	-0.236619	0.101648	0.908308	2.05834e-19	0.471179	0.000632868	0.5949	6.54841e-06	-0.302651	0.0345392
DCTN1	darkgreen	-0.495353	0.000296027	0.2511	0.0818011	-0.616039	2.4539e-06	0.465365	0.000753568	0.465189	0.000757528	-0.418672	0.00275425	-0.31129	0.0294664	0.158432	0.276914	0.302684	0.0345187	-0.193714	0.182313	-0.21053	0.146503	-0.0339373	0.81693	-0.359474	0.0111875	-0.709131	1.17922e-08	-0.423359	0.00243791	0.89246	7.29087e-18	0.337935	0.0175579	0.468689	0.000682256	-0.497904	0.00027231
ABL1	darkgreen	-0.287386	0.0452606	0.171988	0.237338	-0.413528	0.00314279	0.249276	0.0841191	0.389033	0.00573283	-0.234229	0.105254	-0.280506	0.0509092	0.119668	0.412788	0.16679	0.252029	-0.0204137	0.889275	0.0962226	0.510732	-0.0877177	0.548953	-0.147564	0.311618	-0.400967	0.00430123	-0.36702	0.00948557	0.752356	4.57797e-10	0.327871	0.0214581	0.16086	0.269524	-0.555158	3.47242e-05
SLC44A2	darkgreen	-0.255316	0.0766361	0.514498	0.000155622	-0.658569	2.69411e-07	0.152903	0.294237	0.554348	3.58461e-05	-0.0842858	0.564753	-0.116788	0.424203	-0.0127615	0.930649	0.339935	0.0168592	-0.0295098	0.84048	0.0603394	0.680451	-0.0506458	0.72965	-0.345683	0.014981	-0.833119	1.12351e-13	-0.251569	0.0812134	0.905174	4.37677e-19	0.450892	0.00114853	0.481459	0.000461266	-0.328898	0.0210294
INO80E	darkgreen	-0.372147	0.00846107	0.117825	0.420073	-0.502046	0.000237445	0.296674	0.0384557	0.490151	0.000350273	-0.238251	0.0992417	-0.249752	0.0835095	0.0575611	0.694429	0.336856	0.0179451	-0.0859124	0.557238	-0.0481181	0.742668	-0.0845433	0.563561	-0.433677	0.00185215	-0.684584	5.8206e-08	-0.298339	0.0373295	0.885633	2.86579e-17	0.426431	0.00224837	0.375994	0.00775649	-0.40639	0.00376176
CTSA	darkgreen	-0.248307	0.0853721	0.104595	0.474467	-0.332119	0.0197311	0.247512	0.0864095	0.410554	0.00338878	-0.109368	0.454422	-0.143619	0.324871	0.0175266	0.904857	0.285322	0.0468987	0.016422	0.910828	0.0234229	0.873078	-0.14146	0.332275	-0.425257	0.00231919	-0.666829	1.68354e-07	-0.1772	0.223205	0.846153	1.93438e-14	0.507494	0.000197766	0.382168	0.00673191	-0.34885	0.0140249
CTDSPL	darkgreen	-0.322056	0.0240275	0.196266	0.176509	-0.591825	7.51025e-06	0.409535	0.0034769	0.441846	0.00148095	-0.324707	0.0228258	-0.248043	0.0857145	0.156292	0.283536	0.29721	0.0380905	-0.0127312	0.930814	0.0478655	0.743973	-0.0624292	0.670007	-0.557811	3.12705e-05	-0.70181	1.93037e-08	-0.349404	0.0138629	0.894583	4.67453e-18	0.488474	0.000369589	0.604467	4.23645e-06	-0.411877	0.00327738
MSRB2	darkgreen	-0.0963268	0.510272	0.449854	0.00118294	-0.561883	2.65792e-05	0.206221	0.155139	0.426	0.00227415	-0.0503554	0.731142	-0.0541954	0.711497	-0.053137	0.716894	0.312697	0.0287019	0.186188	0.200227	0.174066	0.231632	0.0220567	0.880426	-0.520326	0.000126977	-0.799949	5.38347e-12	-0.184874	0.203477	0.903842	5.9841e-19	0.602857	4.56329e-06	0.632191	1.10289e-06	-0.290333	0.0430023
VPS39	darkgreen	-0.233519	0.106344	0.19424	0.181106	-0.450548	0.00115983	0.21656	0.135023	0.413328	0.00315884	-0.100478	0.492127	-0.133581	0.360171	0.022492	0.878084	0.298003	0.0375547	-0.0035527	0.980672	0.0108915	0.940792	-0.0509307	0.728188	-0.538605	6.54563e-05	-0.815634	9.51456e-13	-0.155632	0.2856	0.882053	5.67678e-17	0.532901	8.0821e-05	0.621966	1.83934e-06	-0.195749	0.177674
DNAJB12	darkgreen	-0.237035	0.10103	0.505477	0.000211694	-0.627919	1.36872e-06	0.0854724	0.559267	0.568064	2.06819e-05	-0.00127359	0.993071	-0.0565162	0.699712	0.0279344	0.848894	0.388512	0.00580378	-0.0833891	0.568916	-0.0184876	0.899666	-0.0373445	0.798915	-0.369306	0.0090162	-0.871233	3.94536e-16	-0.205783	0.156036	0.859138	2.83074e-15	0.429908	0.00204974	0.462157	0.000828682	-0.27819	0.0529347
SNED1	darkgreen	-0.121735	0.404704	0.369211	0.00903535	-0.46752	0.000706619	0.010675	0.941967	0.490349	0.00034806	0.148692	0.30789	-0.00207259	0.988723	0.0278111	0.849553	0.236055	0.102491	0.0639191	0.662597	0.121155	0.406962	-0.0838715	0.566675	-0.394962	0.00497664	-0.823585	3.70795e-13	-0.0324311	0.824925	0.808509	2.13234e-12	0.513188	0.000162822	0.461521	0.000844334	-0.111184	0.44692
FAM3A	darkgreen	-0.310307	0.0300102	0.388281	0.0058356	-0.651821	3.91419e-07	0.222226	0.124861	0.537332	6.86322e-05	-0.104333	0.47558	-0.126145	0.387766	0.00535409	0.970875	0.378977	0.00724574	-0.00754097	0.958987	-0.0389918	0.790241	-0.0146413	0.920464	-0.519858	0.000129085	-0.883136	4.62741e-17	-0.238911	0.0982813	0.937052	4.11623e-23	0.499285	0.000260202	0.575165	1.5406e-05	-0.305748	0.0326439
KL	darkgreen	0.492274	0.000327138	-0.311602	0.0292953	0.730394	2.57712e-09	-0.516319	0.000146095	-0.565648	2.28265e-05	0.30703	0.0318848	0.416359	0.00292339	-0.255393	0.0765434	-0.373906	0.0081323	0.164346	0.259144	0.20356	0.160654	-0.0475263	0.745727	0.280005	0.0513422	0.708216	1.25519e-08	0.474812	0.000566589	-0.819908	5.76568e-13	-0.239233	0.0978151	-0.385581	0.00621771	0.465072	0.000760168
MCRS1	darkgreen	-0.246348	0.0879478	0.381785	0.00679192	-0.544617	5.21951e-05	0.150978	0.300431	0.501472	0.000242025	-0.139365	0.339555	-0.344845	0.0152433	0.142503	0.328686	0.328964	0.0210021	-0.0531093	0.717035	0.02345	0.872933	-0.0443583	0.762164	-0.295364	0.0393609	-0.631516	1.14139e-06	-0.378399	0.00734239	0.826346	2.6435e-13	0.345705	0.0149743	0.227431	0.116045	-0.521547	0.000121622
SH3BGRL3	darkgreen	-0.0333147	0.820233	0.419803	0.0026748	-0.388663	0.00578317	0.0563782	0.700411	0.396151	0.00483603	-0.0520294	0.722557	-0.0520217	0.722596	-0.130486	0.37151	0.221357	0.126381	0.0876047	0.54947	0.285107	0.0470717	-0.183729	0.206341	-0.375292	0.00788115	-0.632048	1.11092e-06	-0.216347	0.135416	0.838379	5.62819e-14	0.557048	3.22294e-05	0.338494	0.0173602	-0.45133	0.0011343
BPIFB1	darkgreen	-0.125334	0.390848	0.257025	0.0746168	-0.385657	0.00620668	0.188893	0.19365	0.36258	0.0104576	-0.0923999	0.527743	-0.0913705	0.532371	-0.013785	0.925102	0.223782	0.122175	0.300903	0.0356492	0.312209	0.0289653	-0.241863	0.0940729	-0.540067	6.1975e-05	-0.640256	7.2701e-07	-0.190434	0.189974	0.863898	1.33324e-15	0.628368	1.33817e-06	0.454928	0.00102308	-0.380411	0.00701083
NARR	darkgreen	-0.25604	0.0757754	0.368801	0.00911818	-0.563101	2.53066e-05	0.308135	0.0312418	0.470211	0.000651669	-0.192893	0.18421	-0.130511	0.371418	0.0481554	0.742476	0.264688	0.0660747	0.0775245	0.596486	0.11118	0.446939	-0.133643	0.359945	-0.525089	0.000107231	-0.711252	1.0194e-08	-0.319835	0.0250746	0.912361	7.44668e-20	0.506802	0.000202449	0.515463	0.000150505	-0.461585	0.000842763
CEBPD	darkgreen	-0.308597	0.0309769	-0.16754	0.249873	-0.228375	0.114498	0.232894	0.10731	0.247945	0.0858426	-0.143495	0.325294	-0.0829897	0.570775	-0.0429673	0.769413	0.24449	0.0904462	0.118776	0.416304	0.100768	0.490872	-0.126936	0.384771	-0.21171	0.144201	-0.439874	0.00156389	-0.157463	0.279901	0.593747	6.89501e-06	0.38986	0.00562168	0.487418	0.000382239	-0.213071	0.141581
AQP5	darkgreen	-0.348304	0.0141858	-0.0246625	0.866421	-0.371036	0.00867446	0.415684	0.00297444	0.376662	0.00763952	-0.357663	0.0116332	-0.427349	0.00219436	0.184799	0.203664	0.273119	0.0575973	-0.167945	0.248712	-0.0627169	0.668573	-0.0222426	0.879425	-0.345191	0.0151346	-0.411933	0.00327272	-0.431274	0.00197606	0.752787	4.41739e-10	0.302397	0.0346988	0.198264	0.172059	-0.585327	9.98666e-06
UBAP2	darkgreen	-0.177587	0.222181	0.359402	0.0112052	-0.480372	0.00047718	0.126373	0.386902	0.386216	0.00612597	0.000892503	0.995144	0.0237598	0.871268	0.0917894	0.530485	0.223145	0.123269	0.137406	0.346455	0.143622	0.32486	-0.203361	0.161074	-0.535029	7.4742e-05	-0.811541	1.51882e-12	-0.0734868	0.615803	0.86227	1.73036e-15	0.560379	2.82309e-05	0.710348	1.08488e-08	-0.100048	0.493989
PRKCSH	darkgreen	-0.327868	0.0214593	0.24208	0.0937685	-0.565773	2.27109e-05	0.348116	0.0142417	0.309727	0.030335	-0.186859	0.198582	-0.0142433	0.92262	0.125205	0.391341	0.142627	0.328259	0.0118834	0.935411	0.0130476	0.929098	-0.0774091	0.597035	-0.259487	0.0717824	-0.602278	4.68624e-06	-0.27808	0.053032	0.737676	1.48089e-09	0.356054	0.0120416	0.584723	1.02512e-05	-0.354171	0.0125351
SUOX	darkgreen	-0.1842	0.20516	0.363347	0.0102839	-0.544293	5.28405e-05	0.175713	0.227179	0.486855	0.000389152	0.0179399	0.902624	-0.0761358	0.6031	0.0614508	0.674889	0.346793	0.0146398	0.0258662	0.859965	0.0114182	0.937934	0.024323	0.868243	-0.559572	2.91545e-05	-0.828951	1.91058e-13	-0.198147	0.172316	0.906948	2.86488e-19	0.509766	0.000183078	0.626436	1.47412e-06	-0.274998	0.0558327
ABTB2	darkgreen	-0.20776	0.152012	0.410905	0.00335889	-0.572227	1.74169e-05	0.106034	0.468376	0.494054	0.000308804	-0.0177056	0.90389	-0.204542	0.158603	0.138684	0.341944	0.298848	0.0369908	-0.0933317	0.523571	0.08211	0.574879	0.0579156	0.69264	-0.323758	0.0232498	-0.699961	2.18119e-08	-0.300994	0.0355904	0.852964	7.223e-15	0.408485	0.0035698	0.406351	0.00376533	-0.387441	0.0059522
FAM195A	darkgreen	-0.342171	0.0161061	0.0976242	0.504565	-0.472236	0.000612895	0.268131	0.0624993	0.492915	0.000320419	-0.146487	0.315202	-0.423121	0.00245311	0.239116	0.0979844	0.310073	0.030141	-0.138012	0.344313	-0.0469444	0.748738	-0.0187936	0.898014	-0.322115	0.0240002	-0.564103	2.43025e-05	-0.37486	0.0079587	0.797533	6.93614e-12	0.310641	0.0298248	0.193946	0.18178	-0.489014	0.000363273
CLPTM1L	darkgreen	-0.115046	0.431193	0.434815	0.00179594	-0.509115	0.000187182	0.238376	0.09906	0.424561	0.00236208	-0.180042	0.215752	-0.0894019	0.541277	-0.100068	0.493904	0.316944	0.0264946	0.168841	0.246162	0.221528	0.12608	-0.0455995	0.755711	-0.564699	2.37231e-05	-0.843686	2.73181e-14	-0.161351	0.268045	0.930708	3.66301e-22	0.661952	2.2261e-07	0.690089	4.12417e-08	-0.258844	0.0725136
CHST6	darkgreen	-0.526891	0.000100522	0.418894	0.00273849	-0.746306	7.49865e-10	0.227571	0.115815	0.658268	2.73992e-07	-0.182795	0.208697	-0.335432	0.0184671	0.275761	0.0551284	0.481938	0.000454409	-0.230311	0.111376	-0.221906	0.125419	0.21547	0.137046	-0.169704	0.243721	-0.736617	1.60692e-09	-0.465465	0.000751326	0.841362	3.76163e-14	0.175168	0.228645	0.371353	0.00861321	-0.473208	0.000595043
CXXC5	darkgreen	-0.157018	0.281277	0.411672	0.00329444	-0.522537	0.000117429	0.220875	0.127229	0.379639	0.00713646	-0.0920159	0.529467	-0.00560179	0.969528	-0.029527	0.840388	0.230087	0.111732	0.00642421	0.965057	0.0965615	0.509237	-0.0905928	0.535881	-0.466635	0.000725568	-0.791212	1.32482e-11	-0.176559	0.224912	0.925894	1.68269e-21	0.586843	9.3494e-06	0.645493	5.51018e-07	-0.296606	0.0385021
ATP5G1	darkgreen	-0.190322	0.190239	0.428742	0.00211457	-0.617044	2.33782e-06	0.193652	0.182455	0.436199	0.00172961	-0.0571802	0.696353	0.0199538	0.891755	-0.0655503	0.654522	0.322107	0.0240039	0.104751	0.473806	0.113903	0.435814	-0.00105533	0.994258	-0.548215	4.54863e-05	-0.853685	6.48887e-15	-0.159365	0.274057	0.910898	1.0809e-19	0.60368	4.39348e-06	0.719889	5.55842e-09	-0.247247	0.0867572
MMP24-AS1	darkgreen	-0.34262	0.0159583	0.324117	0.0230888	-0.64151	6.80657e-07	0.251725	0.0810185	0.579751	1.26912e-05	-0.138029	0.344251	-0.16984	0.243337	0.119717	0.412595	0.397913	0.00463394	-0.14859	0.308227	-0.0866644	0.55378	-0.00374084	0.979648	-0.541428	5.88859e-05	-0.855946	4.61954e-15	-0.2574	0.0741792	0.937884	3.03888e-23	0.482013	0.000453344	0.560684	2.78886e-05	-0.350325	0.0135973
RBM10	darkgreen	-0.28071	0.0507342	0.179907	0.216103	-0.429496	0.00207244	0.0973583	0.505732	0.444432	0.00137813	0.00909951	0.95052	-0.0760876	0.60333	0.103324	0.479881	0.313235	0.0284142	0.0862882	0.555509	0.149947	0.303782	-0.203272	0.161261	-0.389351	0.00568985	-0.803954	3.5102e-12	-0.0748439	0.609281	0.863015	1.53627e-15	0.56285	2.55649e-05	0.50793	0.00019487	-0.174763	0.229739
ARHGEF5	darkgreen	-0.427817	0.00216725	0.233953	0.105677	-0.6726	1.20154e-07	0.374103	0.00809623	0.472954	0.000599654	-0.319984	0.025003	-0.273481	0.0572539	0.0975269	0.504992	0.341232	0.0164187	-0.0408414	0.780532	-0.0305005	0.835198	-0.016183	0.912121	-0.388824	0.00576119	-0.720453	5.33811e-09	-0.409244	0.00350247	0.900631	1.24885e-18	0.400721	0.0043272	0.573277	1.66724e-05	-0.438187	0.00163814
RP11-395B7.7	darkgreen	-0.0567773	0.698391	0.238348	0.0991003	-0.275481	0.0553859	0.0742625	0.612072	0.321586	0.0242458	0.0724645	0.620735	0.0390677	0.789842	0.0367637	0.801978	0.200098	0.168045	0.23737	0.100536	0.205314	0.157003	-0.328419	0.0212282	-0.518619	0.000134822	-0.75251	4.52005e-10	0.0453519	0.756997	0.784884	2.47778e-11	0.632945	1.06123e-06	0.541037	5.976e-05	-0.0552912	0.705924
ZNFX1	darkgreen	0.061227	0.676007	0.228632	0.11408	-0.100881	0.490384	0.00860634	0.953199	0.19365	0.182461	0.0708851	0.628389	0.161543	0.267469	-0.0968339	0.508037	0.11478	0.432265	0.358026	0.0115427	0.31308	0.0284969	-0.394074	0.00508398	-0.608116	3.57467e-06	-0.666489	1.71692e-07	0.17393	0.232003	0.724682	3.93123e-09	0.748732	6.16298e-10	0.629593	1.25812e-06	0.037822	0.796398
ZNF362	darkgreen	-0.0720623	0.622681	0.352978	0.0128569	-0.561722	2.67512e-05	0.313595	0.028223	0.401138	0.00428316	-0.0104965	0.942936	-0.0102012	0.944539	0.0539665	0.712663	0.207854	0.151822	0.136946	0.348089	0.146325	0.315742	-0.0555698	0.70451	-0.62731	1.4111e-06	-0.759116	2.59337e-10	-0.160035	0.272019	0.870489	4.47892e-16	0.597378	5.85778e-06	0.67986	7.77673e-08	-0.294945	0.0396545
NME3	darkgreen	-0.415432	0.00299368	0.20649	0.154588	-0.606702	3.81885e-06	0.353207	0.0127946	0.467013	0.000717428	-0.312312	0.0289096	-0.314728	0.0276279	0.161694	0.267017	0.316804	0.0265649	-0.0753195	0.607002	-0.0620461	0.671917	-0.0743222	0.611785	-0.459574	0.000893959	-0.645547	5.49444e-07	-0.404218	0.00397021	0.89529	4.02326e-18	0.389161	0.00571553	0.434458	0.00181344	-0.501916	0.000238481
ACTR8	darkgreen	-0.262683	0.0682305	0.349684	0.0137817	-0.540585	6.07813e-05	0.12706	0.384304	0.369334	0.00901072	-0.0206813	0.887833	0.0728014	0.619108	-0.0792495	0.588316	0.256649	0.0750576	0.0619779	0.672257	-0.00193423	0.989476	0.0325697	0.824188	-0.428555	0.00212512	-0.82811	2.12313e-13	-0.0753786	0.606719	0.824281	3.40648e-13	0.514357	0.000156382	0.715589	7.53842e-09	-0.0903597	0.536935
NCOR2	darkgreen	-0.233564	0.106274	0.11113	0.447145	-0.402598	0.00413226	0.374824	0.00796514	0.330208	0.0204927	-0.174298	0.231001	-0.133219	0.361487	0.0519623	0.7229	0.227734	0.115547	0.152884	0.294296	0.155487	0.286053	-0.226897	0.116927	-0.343009	0.0158315	-0.592606	7.25426e-06	-0.223529	0.122608	0.820966	5.08313e-13	0.542498	5.65587e-05	0.514033	0.000158145	-0.37019	0.00884012
PPP2R1A	darkgreen	-0.220467	0.127952	0.302069	0.0349058	-0.467477	0.000707528	0.251176	0.0817058	0.456541	0.00097646	-0.241638	0.0943887	-0.329594	0.0207429	0.0357564	0.8073	0.288564	0.0443468	-0.142111	0.33003	-0.016789	0.908844	-0.0864408	0.554807	-0.371791	0.00852898	-0.625395	1.55259e-06	-0.339326	0.0170694	0.783432	2.85202e-11	0.383517	0.00652442	0.240903	0.0954264	-0.483853	0.000427898
OR7E37P	darkgreen	-0.261509	0.0695183	0.321154	0.024448	-0.516282	0.000146282	0.202922	0.161998	0.383961	0.00645735	-0.135085	0.354739	-0.00116418	0.993666	-0.150404	0.302293	0.204429	0.158837	0.0858218	0.557656	0.121843	0.404282	0.0532776	0.716176	-0.418732	0.00274999	-0.778056	4.75768e-11	-0.134477	0.356929	0.873231	2.79517e-16	0.58488	1.0182e-05	0.672177	1.23192e-07	-0.222029	0.125204
FKBP8	darkgreen	-0.349679	0.0137833	0.542056	5.75093e-05	-0.745628	7.91852e-10	0.28217	0.049493	0.567379	2.12699e-05	-0.14371	0.324564	-0.216698	0.134767	0.210382	0.146794	0.359842	0.011099	-0.221263	0.126546	-0.0784251	0.592215	0.110235	0.450832	-0.451284	0.00113577	-0.874544	2.22201e-16	-0.356408	0.0119506	0.896661	2.99797e-18	0.350775	0.0134694	0.596041	6.2216e-06	-0.358165	0.0115082
TMED9	darkgreen	-0.245467	0.0891256	0.239135	0.0979571	-0.490801	0.000343034	0.258909	0.0724397	0.414184	0.00309072	-0.19438	0.180787	-0.213177	0.141377	0.0344101	0.814424	0.314039	0.0279888	0.0771438	0.598296	0.171772	0.237936	-0.0808573	0.580746	-0.460342	0.000874093	-0.710972	1.03928e-08	-0.257768	0.0737517	0.904756	4.8304e-19	0.598101	5.6695e-06	0.569864	1.92068e-05	-0.393961	0.00509783
MFI2	darkgreen	-0.346535	0.0147185	0.092017	0.529462	-0.453436	0.00106794	0.378046	0.00740182	0.269723	0.0608999	-0.219748	0.129232	-0.0416917	0.776079	0.0244178	0.867734	0.144346	0.322402	0.175416	0.227976	0.115625	0.428864	-0.16301	0.26309	-0.199062	0.170303	-0.544513	5.24009e-05	-0.220122	0.128564	0.74073	1.16756e-09	0.455306	0.00101197	0.574086	1.61185e-05	-0.31462	0.0276844
ITPR3	darkgreen	-0.204108	0.159508	0.263207	0.0676617	-0.409285	0.00349885	0.333106	0.0193471	0.333114	0.0193439	-0.0629262	0.667532	-0.0913904	0.532281	-0.0100632	0.945288	0.0939179	0.520955	0.131465	0.367901	0.119558	0.413219	-0.190541	0.189721	-0.323693	0.0232791	-0.601581	4.83854e-06	-0.214189	0.139454	0.847158	1.67783e-14	0.508779	0.000189332	0.409316	0.00349611	-0.402704	0.00412146
TXN2	darkgreen	-0.234037	0.105548	0.367209	0.00944605	-0.672971	1.17543e-07	0.2928	0.0411837	0.454805	0.00102671	-0.086925	0.552584	-0.119907	0.411847	0.186754	0.198839	0.329769	0.0206713	0.0556643	0.70403	0.0486704	0.739818	-0.125446	0.390423	-0.700708	2.07646e-08	-0.83055	1.56127e-13	-0.244588	0.0903126	0.923047	3.95235e-21	0.531595	8.47757e-05	0.64244	6.48072e-07	-0.328445	0.0212176
PGAP3	darkgreen	-0.436368	0.00172165	0.288276	0.0445687	-0.683041	6.40197e-08	0.384829	0.006328	0.567818	2.08912e-05	-0.274568	0.0562324	-0.24281	0.0927522	0.182928	0.208361	0.383841	0.00647541	-0.0470969	0.747948	-0.0406237	0.781673	-0.0374563	0.798325	-0.523878	0.000111967	-0.777302	5.10591e-11	-0.359939	0.0110757	0.930999	3.32877e-22	0.457494	0.000949847	0.560141	2.85005e-05	-0.459484	0.000896325
EXOC3	darkgreen	-0.26764	0.0630003	0.223925	0.12193	-0.507385	0.000198499	0.181633	0.211654	0.439282	0.00158961	-0.109188	0.45517	-0.115536	0.429219	0.0505399	0.730195	0.245227	0.0894481	0.0475045	0.74584	0.0851773	0.560629	-0.190682	0.189386	-0.490164	0.00035013	-0.820883	5.1342e-13	-0.154107	0.290405	0.912992	6.32753e-20	0.569902	1.91764e-05	0.58177	1.16424e-05	-0.233638	0.106161
C1orf116	darkgreen	-0.445911	0.0013222	0.249841	0.0833954	-0.74995	5.57996e-10	0.415807	0.00296505	0.557316	3.18894e-05	-0.328926	0.0210178	-0.35816	0.0115093	0.239165	0.0979133	0.314147	0.0279315	-0.28032	0.0510692	-0.212064	0.143517	0.0656753	0.653905	-0.455592	0.00100365	-0.749801	5.64815e-10	-0.437832	0.00165414	0.86075	2.20058e-15	0.280643	0.0507915	0.454403	0.00103868	-0.417578	0.00283318
AGFG2	darkgreen	-0.370508	0.00877752	0.3001	0.0361687	-0.597523	5.81967e-06	0.398567	0.00456086	0.423186	0.00244898	-0.30044	0.0359481	-0.25616	0.0756333	0.130601	0.371082	0.296247	0.0387489	0.0477417	0.744613	0.0805107	0.582374	-0.0550347	0.707227	-0.36175	0.0106486	-0.656893	2.95866e-07	-0.398027	0.00462113	0.89959	1.57683e-18	0.453449	0.00106756	0.552881	3.79637e-05	-0.502656	0.000232675
GAPDH	darkgreen	-0.0536609	0.714221	0.0368219	0.801671	-0.0797037	0.586173	0.324956	0.0227156	0.183629	0.206593	-0.214013	0.139787	-0.260801	0.0703041	-0.0156668	0.914914	0.0475316	0.745699	0.00184711	0.98995	0.118791	0.416243	-0.188675	0.194174	-0.233926	0.105718	-0.217083	0.13406	-0.277867	0.0532218	0.577083	1.42116e-05	0.368337	0.00921276	0.0721456	0.622278	-0.53232	8.256e-05
BLVRB	darkgreen	-0.299012	0.0368822	0.437504	0.00166906	-0.639882	7.41383e-07	0.323357	0.0234312	0.52825	9.57175e-05	-0.140361	0.336081	-0.158584	0.276446	0.0684271	0.640376	0.386348	0.00610698	-0.00256539	0.986042	-0.0624925	0.669691	-0.032285	0.825701	-0.509715	0.000183395	-0.876673	1.52268e-16	-0.266964	0.0636933	0.936271	5.4524e-23	0.485611	0.000404812	0.55896	2.98744e-05	-0.347566	0.0144061
MRPL24	darkgreen	-0.19888	0.170702	0.435097	0.00178224	-0.649101	4.53844e-07	0.363047	0.0103517	0.471615	0.000624572	-0.240034	0.0966639	-0.219114	0.130368	0.14864	0.308061	0.351831	0.0131726	-0.0859172	0.557216	-0.0118799	0.93543	-0.0684655	0.640188	-0.624367	1.63389e-06	-0.760474	2.30856e-10	-0.350979	0.0134117	0.928248	8.08995e-22	0.499253	0.000260476	0.542588	5.6366e-05	-0.496949	0.000280975
KCTD14	darkgreen	-0.0448332	0.759693	0.573265	1.66807e-05	-0.591849	7.50235e-06	0.00800541	0.956463	0.373054	0.00829018	-0.0591575	0.686384	0.0192009	0.895816	-0.00443751	0.975859	0.213122	0.141482	0.0854362	0.559433	0.22912	0.113288	-0.00558637	0.969612	-0.591902	7.48459e-06	-0.804022	3.48458e-12	-0.139502	0.339079	0.826168	2.70232e-13	0.567277	2.13594e-05	0.730264	2.60235e-09	-0.189013	0.193363
PRSS8	darkgreen	-0.420442	0.00263075	0.204228	0.159257	-0.559054	2.97626e-05	0.40274	0.00411783	0.487517	0.000381041	-0.402456	0.00414672	-0.472172	0.000614086	0.270626	0.0600073	0.335619	0.0183977	-0.139571	0.338835	-0.0851372	0.560814	0.0148097	0.919553	-0.280141	0.0512238	-0.525631	0.000105171	-0.518138	0.000137112	0.836497	7.22808e-14	0.264189	0.0666063	0.213432	0.140892	-0.636791	8.70816e-07
CNP	darkgreen	-0.0654896	0.654822	0.407102	0.00369555	-0.51591	0.000148185	0.259723	0.0715152	0.35057	0.0135277	-0.0520269	0.722569	-0.0397446	0.786286	0.0266905	0.855549	0.221358	0.126379	0.189293	0.192691	0.220774	0.127408	-0.113414	0.4378	-0.601863	4.77632e-06	-0.762508	1.93637e-10	-0.139359	0.339576	0.897749	2.3668e-18	0.6624	2.17019e-07	0.658302	2.73476e-07	-0.289712	0.0434705
NDST2	darkgreen	-0.178693	0.219269	0.308861	0.0308259	-0.504951	0.000215474	0.318744	0.0256029	0.394751	0.00500204	-0.143844	0.324107	-0.0152118	0.917376	0.0557647	0.703521	0.22813	0.114899	0.0720964	0.622516	0.0988367	0.49926	-0.180741	0.213946	-0.596729	6.0318e-06	-0.759181	2.57913e-10	-0.186718	0.198927	0.878852	1.02683e-16	0.569336	1.96293e-05	0.675158	1.0322e-07	-0.293157	0.0409262
RAB15	darkgreen	-0.459212	0.000903478	0.30671	0.0320727	-0.742201	1.03994e-09	0.506508	0.000204469	0.54776	4.62893e-05	-0.304711	0.0332686	-0.401852	0.00420872	0.175965	0.226501	0.370634	0.00875293	-0.0487358	0.739481	-0.0686933	0.639073	0.111134	0.447126	-0.324937	0.0227239	-0.689373	4.31498e-08	-0.515157	0.000152111	0.905265	4.28415e-19	0.325328	0.0225516	0.507276	0.000199233	-0.524851	0.000108148
DNPH1	darkgreen	-0.209945	0.147654	0.366439	0.00960811	-0.572529	1.71994e-05	0.183321	0.207368	0.468428	0.00068762	-0.0987756	0.499527	-0.134075	0.358382	0.0746339	0.610288	0.36353	0.0102428	0.151858	0.297588	0.198544	0.171442	-0.169693	0.243751	-0.634999	9.55205e-07	-0.803723	3.59868e-12	-0.215349	0.137272	0.95276	5.75852e-26	0.631984	1.11454e-06	0.620747	1.95265e-06	-0.350301	0.0136044
MLF2	darkgreen	-0.246458	0.0878009	0.243944	0.0911899	-0.49336	0.000315841	0.493511	0.0003143	0.479337	0.000492789	-0.209301	0.148928	-0.451884	0.00111648	0.334262	0.0189054	0.287905	0.0448559	-0.0643645	0.660389	0.00985323	0.946428	-0.0366408	0.802628	-0.406685	0.00373421	-0.497792	0.00027331	-0.475106	0.000561495	0.811226	1.57372e-12	0.363866	0.0101677	0.204792	0.158084	-0.673462	1.14172e-07
BAG6	darkgreen	-0.248682	0.0848853	0.21325	0.141238	-0.429915	0.00204937	0.262042	0.0689317	0.394111	0.00507956	-0.18077	0.213869	-0.0944993	0.518366	-0.0382274	0.794263	0.232237	0.108333	0.0911915	0.533178	0.183032	0.208098	-0.207662	0.152209	-0.391034	0.00546706	-0.703022	1.78096e-08	-0.206663	0.154236	0.914349	4.44076e-20	0.60606	3.93479e-06	0.541535	5.86493e-05	-0.379692	0.00712776
ADIPOR1	darkgreen	-0.0727174	0.619514	0.553619	3.68839e-05	-0.552692	3.82444e-05	0.195285	0.178723	0.370828	0.00871498	-0.1526	0.295205	-0.04645	0.751299	0.0399337	0.785293	0.241381	0.0947504	0.188283	0.19512	0.27702	0.0539825	-0.122988	0.399846	-0.596632	6.05848e-06	-0.754423	3.8552e-10	-0.20686	0.153835	0.879998	8.32172e-17	0.612417	2.91804e-06	0.618202	2.21036e-06	-0.35608	0.0120349
SIRT7	darkgreen	-0.152697	0.294895	0.326774	0.0219243	-0.453365	0.00107014	0.158	0.278244	0.486116	0.000398379	-0.171766	0.237952	-0.147465	0.311944	-0.0405555	0.78203	0.331176	0.0201039	0.0714433	0.625679	0.211243	0.145109	-0.0689088	0.63802	-0.395759	0.00488195	-0.71205	9.64759e-09	-0.212878	0.14195	0.879741	8.72471e-17	0.566411	2.21277e-05	0.390007	0.00560207	-0.382338	0.00670542
SF1	darkgreen	-0.158694	0.276111	0.125399	0.390602	-0.297663	0.0377834	0.269107	0.0615148	0.236951	0.101156	-0.17294	0.234713	0.0264591	0.856788	-0.0803248	0.583248	0.147049	0.313326	0.256382	0.0753717	0.258235	0.0732127	-0.227393	0.116107	-0.394798	0.00499634	-0.611558	3.0396e-06	-0.0966576	0.508814	0.768347	1.15775e-10	0.636555	8.81544e-07	0.680967	7.2694e-08	-0.225182	0.119794
ABI3	darkgreen	-0.246799	0.0873489	0.44278	0.00144305	-0.587255	9.18275e-06	0.225842	0.118685	0.503758	0.000224259	-0.0542584	0.711176	-0.150494	0.302	0.194696	0.180064	0.296001	0.0389188	-0.199803	0.168686	-0.142401	0.329033	0.0571338	0.696588	-0.411302	0.00332542	-0.773201	7.4628e-11	-0.284629	0.0474596	0.874558	2.21629e-16	0.37836	0.00734886	0.455576	0.00100412	-0.37645	0.00767639
E2F4	darkgreen	-0.384856	0.00632407	0.449029	0.00121095	-0.747753	6.67225e-10	0.270152	0.0604749	0.553548	3.69862e-05	-0.107727	0.46126	-0.136963	0.348027	0.225172	0.119811	0.336531	0.018063	-0.17703	0.223657	-0.0943325	0.519108	-0.0319619	0.827419	-0.49173	0.000332925	-0.866156	9.23523e-16	-0.332963	0.0194022	0.929683	5.11255e-22	0.400761	0.00432297	0.58386	1.06409e-05	-0.376643	0.00764271
ACTN4	darkgreen	-0.27473	0.0560817	-0.0148228	0.919482	-0.327918	0.0214383	0.485685	0.000403859	0.24517	0.0895256	-0.325429	0.0225071	-0.246215	0.0881247	0.0267767	0.855088	0.1497	0.304585	0.0316391	0.829136	0.0494073	0.73602	-0.26056	0.0705732	-0.311395	0.0294087	-0.42243	0.00249793	-0.307862	0.0313998	0.731746	2.32833e-09	0.44035	0.00154352	0.323336	0.0234405	-0.471792	0.000621216
HYPK	darkgreen	-0.274576	0.0562247	0.213465	0.140828	-0.497423	0.000276649	0.43711	0.00168713	0.412065	0.00326177	-0.284881	0.0472544	-0.276221	0.0547074	0.0543035	0.710946	0.318699	0.0256245	-0.00218621	0.988105	0.00562775	0.969387	-0.0532526	0.716304	-0.531152	8.61571e-05	-0.658917	2.64213e-07	-0.354861	0.0123525	0.903105	7.10112e-19	0.479411	0.000491661	0.477393	0.000523355	-0.489755	0.000354749
WDR45	darkgreen	-0.332608	0.0195401	0.252232	0.080388	-0.517062	0.000142365	0.341602	0.016295	0.52766	9.77773e-05	-0.318705	0.0256218	-0.386859	0.00603422	0.0341975	0.815551	0.322645	0.0237559	-0.0789684	0.589644	-0.0034204	0.981391	0.063691	0.66373	-0.129657	0.374581	-0.53085	8.71091e-05	-0.439005	0.00160174	0.792829	1.12514e-11	0.330207	0.0204931	0.0977522	0.504003	-0.638997	7.7647e-07
SLC9A3R1	darkgreen	-0.364488	0.0100299	0.316165	0.0268884	-0.618416	2.18757e-06	0.432519	0.00191098	0.415728	0.00297109	-0.2921	0.0416932	-0.23998	0.0967405	0.126156	0.387723	0.243927	0.0912139	-0.026117	0.858621	0.0107618	0.941496	-0.000795082	0.995674	-0.389823	0.00562659	-0.669004	1.48386e-07	-0.410515	0.00339215	0.896474	3.12119e-18	0.42079	0.00260706	0.590211	8.06574e-06	-0.486037	0.000399378
DMBT1	darkgreen	-0.153899	0.291065	0.168054	0.248401	-0.341162	0.0164425	0.405306	0.00386457	0.271932	0.0587347	-0.22678	0.117121	-0.0302033	0.836781	-0.0661577	0.651525	0.131826	0.366575	0.213433	0.140889	0.154876	0.287977	-0.116484	0.425416	-0.409079	0.00351701	-0.579752	1.2691e-05	-0.173073	0.234347	0.751984	4.72107e-10	0.532498	8.20236e-05	0.66829	1.54679e-07	-0.246542	0.0876895
PTPRS	darkgreen	-0.329983	0.0205843	0.291042	0.042473	-0.640483	7.18409e-07	0.260374	0.0707819	0.52014	0.000127808	-0.158225	0.27755	-0.151716	0.298047	0.203553	0.160669	0.357666	0.0116323	-0.0142151	0.922773	-0.0124866	0.93214	-0.160301	0.271212	-0.551355	4.02885e-05	-0.804678	3.24567e-12	-0.254967	0.0770535	0.89989	1.47475e-18	0.465899	0.000741683	0.54378	5.38802e-05	-0.317515	0.026209
WDR83OS	darkgreen	-0.138358	0.343092	0.351372	0.0133009	-0.550849	4.10867e-05	0.327701	0.0215299	0.358125	0.011518	-0.340293	0.0167366	-0.139455	0.339242	-0.0376229	0.797447	0.248767	0.0847754	0.140915	0.334159	0.17301	0.23452	-0.0531876	0.716636	-0.604546	4.22109e-06	-0.663014	2.09569e-07	-0.290062	0.043206	0.863179	1.49654e-15	0.575613	1.5119e-05	0.608033	3.58869e-06	-0.410745	0.00337251
GGT7	darkgreen	-0.415736	0.0029705	0.0449101	0.759292	-0.516512	0.000145115	0.460437	0.000871664	0.507732	0.000196182	-0.217081	0.134064	-0.475125	0.000561179	0.31942	0.0252742	0.332281	0.0196675	-0.106961	0.464472	-0.142279	0.329454	-0.0901079	0.538075	-0.205875	0.155848	-0.482989	0.000439681	-0.472152	0.000614458	0.772506	7.9521e-11	0.221746	0.125699	0.125556	0.390002	-0.56678	2.17972e-05
EIF2D	darkgreen	-0.202017	0.163918	0.330058	0.0205536	-0.515126	0.000152276	0.296458	0.0386036	0.343987	0.0155159	-0.171751	0.237995	-0.118482	0.417466	0.0314317	0.830239	0.251622	0.0811469	0.0654206	0.655163	0.0677725	0.643584	0.0587668	0.68835	-0.506257	0.000206204	-0.737254	1.53001e-09	-0.192951	0.184075	0.845758	2.04525e-14	0.510516	0.000178453	0.728496	2.96882e-09	-0.219846	0.129056
C11orf52	darkgreen	-0.372277	0.00843638	0.443662	0.00140804	-0.742669	1.00221e-09	0.301257	0.0354221	0.518849	0.00013374	-0.17947	0.217238	-0.169562	0.24412	0.100502	0.492021	0.361003	0.0108231	-0.0245167	0.867204	-0.0729629	0.618329	0.0620673	0.671811	-0.489386	0.000358967	-0.853404	6.76602e-15	-0.2895	0.0436314	0.908412	2.00665e-19	0.432669	0.00190329	0.665786	1.78795e-07	-0.27852	0.0526418
DCTN3	darkgreen	-0.0725591	0.620278	0.452398	0.0011002	-0.496894	0.000281486	0.187159	0.197849	0.346568	0.0147085	-0.163664	0.261154	0.0417091	0.775989	-0.111417	0.445965	0.221597	0.12596	0.185615	0.20164	0.264215	0.0665784	-0.0960146	0.51165	-0.618084	2.22305e-06	-0.770642	9.41926e-11	-0.162147	0.26566	0.896382	3.18337e-18	0.677597	8.91783e-08	0.719101	5.87997e-09	-0.309953	0.0302086
DHRS4	darkgreen	-0.349352	0.0138782	0.372952	0.0083092	-0.626821	1.44603e-06	0.337778	0.017614	0.49788	0.000272524	-0.287205	0.0454021	-0.259451	0.0718226	0.143787	0.324299	0.378074	0.00739708	-0.0736274	0.615126	-0.0364857	0.803446	-0.156867	0.281748	-0.368104	0.00926043	-0.792327	1.18382e-11	-0.325977	0.0222684	0.915517	3.25838e-20	0.452534	0.00109592	0.498851	0.000263951	-0.397941	0.00463074
FBXL16	darkgreen	-0.237988	0.0996269	0.408932	0.00352997	-0.681044	7.23532e-08	0.337469	0.0177243	0.479964	0.000483274	-0.144446	0.322064	-0.194758	0.179923	0.203561	0.160653	0.328573	0.0211642	0.000399814	0.997825	0.0571358	0.696578	-0.018229	0.901063	-0.603722	4.38487e-06	-0.746503	7.38107e-10	-0.31525	0.0273575	0.900175	1.38341e-18	0.496578	0.000284416	0.58925	8.41416e-06	-0.431678	0.00195473
IER3	darkgreen	-0.409648	0.00346708	0.0230215	0.875236	-0.523252	0.000114489	0.422271	0.0025083	0.373342	0.00823653	-0.300162	0.0361283	-0.235499	0.103327	0.0589556	0.6874	0.294681	0.0398404	0.0589625	0.687365	-0.0016738	0.990893	-0.0807607	0.5812	-0.325971	0.022271	-0.557745	3.13521e-05	-0.354849	0.0123555	0.768356	1.15675e-10	0.378565	0.00731455	0.484631	0.000417536	-0.453046	0.00107996
MIR6840	darkgreen	-0.272034	0.0586361	-0.268105	0.0625266	-0.079554	0.586879	0.194633	0.180208	0.236447	0.101906	-0.0226666	0.877145	0.0639137	0.662624	-0.0376712	0.797193	0.127726	0.381796	0.214996	0.137933	0.196491	0.176003	-0.266774	0.0638898	-0.231363	0.109706	-0.515059	0.000152627	0.120762	0.408497	0.564387	2.40248e-05	0.517984	0.000137855	0.594323	6.71989e-06	0.0761645	0.602963
NPRL2	darkgreen	-0.220717	0.127509	0.444556	0.00137337	-0.585727	9.81479e-06	0.117937	0.419625	0.492477	0.000324997	-0.0469593	0.74866	-0.0523002	0.721171	-0.0120591	0.934458	0.345483	0.0150433	0.134723	0.356043	0.173662	0.232733	-0.123274	0.398745	-0.55233	3.87886e-05	-0.880477	7.61646e-17	-0.179311	0.217652	0.962143	3.50889e-28	0.597567	5.80803e-06	0.63919	7.6871e-07	-0.290258	0.0430584
RAB11FIP5	darkgreen	-0.270409	0.0602205	0.357472	0.0116811	-0.656583	3.01012e-07	0.411912	0.00327447	0.457055	0.000962029	-0.306608	0.0321327	-0.264199	0.0665949	0.117185	0.42262	0.339989	0.0168409	-0.196445	0.176107	-0.111171	0.446975	0.0184218	0.900022	-0.372473	0.00839924	-0.677934	8.73819e-08	-0.404473	0.00394516	0.875502	1.87588e-16	0.369341	0.00900913	0.463835	0.000788601	-0.483143	0.000437569
RNF187	darkgreen	-0.301481	0.0352792	0.228202	0.11478	-0.543713	5.40178e-05	0.320327	0.0248393	0.34296	0.0158475	-0.148022	0.310101	-0.0157985	0.914201	0.0544026	0.710442	0.222935	0.123631	0.158906	0.27546	0.0908207	0.534851	-0.111187	0.44691	-0.496865	0.00028175	-0.733231	2.08122e-09	-0.167706	0.249397	0.828091	2.12804e-13	0.543571	5.43084e-05	0.768889	1.10292e-10	-0.216589	0.134968
VPS25	darkgreen	-0.111688	0.444852	0.372334	0.00842562	-0.468271	0.000690871	0.057096	0.696779	0.536173	7.16478e-05	-0.0889568	0.5433	-0.238882	0.0983238	-0.0143132	0.922241	0.412039	0.00326391	-0.0234091	0.873152	0.139277	0.339866	-0.013672	0.925715	-0.394297	0.00505685	-0.6718	1.25961e-07	-0.267518	0.0631249	0.844168	2.55492e-14	0.463282	0.00080161	0.244542	0.0903747	-0.453029	0.00108048
YIPF3	darkgreen	-0.279352	0.0519101	0.389709	0.00564189	-0.675859	9.89826e-08	0.459215	0.000903382	0.462397	0.000822831	-0.270406	0.0602239	-0.163894	0.260474	0.127147	0.383977	0.253803	0.0784587	0.0229262	0.875748	0.0273093	0.852237	-0.109772	0.452749	-0.57648	1.45773e-05	-0.774078	6.88551e-11	-0.325578	0.0224421	0.936743	4.60214e-23	0.520522	0.000126103	0.609691	3.31978e-06	-0.437488	0.00166977
UBBP1	darkgreen	-0.140975	0.333951	0.491474	0.000335682	-0.507625	0.000196894	0.0776558	0.595863	0.359983	0.0110652	-0.283361	0.0484995	-0.0553617	0.705566	-0.11354	0.437291	0.285375	0.0468559	0.0267355	0.855308	0.197909	0.172842	-0.0499062	0.733452	-0.491347	0.000337059	-0.721954	4.79188e-09	-0.1832	0.207673	0.782946	2.98885e-11	0.553812	3.66061e-05	0.63775	8.28552e-07	-0.250577	0.0824611
TJP3	darkgreen	-0.359794	0.0111104	0.336899	0.0179294	-0.615859	2.47527e-06	0.223427	0.122783	0.510339	0.000179537	-0.195646	0.177907	-0.234958	0.104145	0.129645	0.374627	0.414874	0.00303674	-0.0364857	0.803446	-0.011104	0.939639	-0.0775953	0.59615	-0.442649	0.0014483	-0.804794	3.20514e-12	-0.336275	0.0181563	0.926232	1.51693e-21	0.446841	0.00128811	0.470297	0.000649976	-0.420989	0.00259363
ZDHHC5	darkgreen	-0.102203	0.484685	0.363741	0.0101956	-0.486161	0.000397808	0.308748	0.0308904	0.405236	0.00387123	-0.254989	0.0770269	-0.104689	0.474068	-0.0391201	0.789566	0.292278	0.0415635	0.181558	0.211847	0.209713	0.148113	-0.0892491	0.541971	-0.688018	4.69898e-08	-0.745481	8.0122e-10	-0.219098	0.130398	0.895608	3.75928e-18	0.640811	7.06122e-07	0.683606	6.1831e-08	-0.327614	0.0215664
SELENBP1	darkgreen	-0.311259	0.0294834	0.122072	0.403395	-0.424442	0.0023695	0.345377	0.0150763	0.374197	0.00807905	-0.3247	0.0228288	-0.260668	0.0704526	0.0683898	0.640559	0.221348	0.126397	-0.0546055	0.70941	0.0593033	0.685652	-0.0934711	0.522948	-0.375212	0.00789549	-0.592972	7.1371e-06	-0.33519	0.0185569	0.874608	2.19708e-16	0.489251	0.000360524	0.455516	0.00100587	-0.48643	0.000394434
FAH	darkgreen	-0.379362	0.00718197	0.475799	0.000549685	-0.735739	1.7191e-09	0.195229	0.17885	0.602045	4.73656e-06	-0.183384	0.207208	-0.296484	0.0385858	0.163063	0.262933	0.449918	0.00118079	-0.135066	0.354806	-0.0705285	0.630122	0.0393352	0.788436	-0.4403	0.00154563	-0.761349	2.14082e-10	-0.406041	0.00379458	0.909499	1.53432e-19	0.342656	0.0159467	0.360344	0.0109789	-0.482507	0.000446381
SPSB3	darkgreen	-0.310078	0.0301381	0.133343	0.361037	-0.493297	0.000316483	0.411109	0.00334165	0.382415	0.0066935	-0.190096	0.190775	-0.103866	0.477571	0.0759971	0.603762	0.196476	0.176037	0.0968617	0.507915	0.0796815	0.586277	-0.161848	0.266554	-0.330256	0.0204734	-0.662742	2.12841e-07	-0.228864	0.113703	0.837378	6.43154e-14	0.512993	0.000163916	0.573279	1.66709e-05	-0.355027	0.0123086
BLOC1S3	darkgreen	-0.252634	0.0798914	0.521763	0.000120696	-0.634123	9.99179e-07	0.16203	0.26601	0.422265	0.00250872	-0.00721269	0.960771	-0.0420315	0.774302	0.112777	0.440395	0.249513	0.083815	0.181657	0.211594	0.19478	0.179873	-0.160634	0.270206	-0.495212	0.000297387	-0.793093	1.09534e-11	-0.202722	0.162422	0.886563	2.3906e-17	0.555984	3.36128e-05	0.58849	8.69979e-06	-0.320312	0.0248463
ZNF75A	darkgreen	-0.140664	0.335031	-0.276389	0.0545545	0.12202	0.403595	0.112109	0.443126	0.105761	0.469527	-0.0369329	0.801086	0.184691	0.203933	-0.137855	0.344865	0.0643956	0.660235	0.257328	0.0742626	0.246248	0.0880809	-0.398548	0.00456289	-0.290255	0.043061	-0.368277	0.00922505	0.230607	0.110903	0.357887	0.0115772	0.471777	0.000621503	0.532242	8.27966e-05	0.204477	0.158738
POLR2I	darkgreen	-0.239959	0.0967712	0.437001	0.00169215	-0.600169	5.16107e-06	0.160473	0.270693	0.465643	0.000747371	-0.125297	0.390988	0.0295617	0.840203	-0.0320043	0.827194	0.315862	0.0270429	0.030868	0.83324	0.0926786	0.526493	-0.042782	0.770381	-0.585562	9.88518e-06	-0.880936	6.99403e-17	-0.170782	0.240693	0.927805	9.30267e-22	0.596807	6.01065e-06	0.723232	4.36882e-09	-0.27566	0.0552214
FAM3D	darkgreen	-0.216069	0.135932	0.260437	0.0707113	-0.489288	0.000360102	0.367249	0.0094376	0.399669	0.00443994	-0.217908	0.132551	-0.164726	0.258029	0.0698933	0.633214	0.241772	0.0941997	0.164484	0.258738	0.180187	0.215375	-0.107278	0.463143	-0.478211	0.000510297	-0.644825	5.7102e-07	-0.30441	0.0334518	0.884167	3.80188e-17	0.539813	6.25661e-05	0.589912	8.1726e-06	-0.425093	0.00232923
RABEP2	darkgreen	-0.284526	0.0475435	0.270459	0.0601717	-0.524521	0.000109427	0.156244	0.283687	0.531249	8.58522e-05	0.0315303	0.829715	-0.121706	0.404814	0.0866733	0.553739	0.35252	0.0129821	-0.0437406	0.765381	0.0103904	0.943512	-0.110526	0.44963	-0.449279	0.0012024	-0.8329	1.15579e-13	-0.142308	0.329355	0.88245	5.26834e-17	0.490729	0.000343832	0.469746	0.000660884	-0.240658	0.0957733
PYROXD2	darkgreen	-0.404198	0.00397215	0.318187	0.025876	-0.622758	1.76912e-06	0.338677	0.017296	0.414651	0.00305407	-0.226263	0.117981	-0.229114	0.113298	0.112577	0.44121	0.269012	0.0616099	-0.127851	0.381326	-0.0842101	0.565104	0.189052	0.193269	-0.264338	0.0664468	-0.721913	4.80619e-09	-0.342102	0.016129	0.854352	5.87373e-15	0.322785	0.0236918	0.598678	5.52324e-06	-0.334444	0.0188365
NOL3	darkgreen	-0.456548	0.000976271	0.169234	0.245048	-0.637527	8.38228e-07	0.389746	0.00563692	0.532073	8.33087e-05	-0.327096	0.0217864	-0.325253	0.0225847	0.146985	0.313541	0.411686	0.00329329	-0.119195	0.414651	-0.120374	0.410015	0.0557536	0.703577	-0.380067	0.0070666	-0.721979	4.7833e-09	-0.358771	0.0113589	0.813755	1.18108e-12	0.286599	0.0458795	0.509634	0.000183902	-0.27412	0.0566516
ICAM3	darkgreen	0.0467418	0.749787	0.33978	0.0169127	-0.242823	0.092734	-0.0619231	0.672531	0.284396	0.0476491	0.132487	0.364156	0.163152	0.262668	-0.110955	0.447865	0.1832	0.207672	0.204498	0.158695	0.307252	0.0317548	-0.263852	0.0669665	-0.637444	8.41832e-07	-0.800567	5.04301e-12	0.112945	0.439709	0.860734	2.20604e-15	0.778015	4.77603e-11	0.658937	2.63906e-07	-0.10339	0.479601
GAK	darkgreen	-0.252827	0.0796529	-0.0316912	0.828858	-0.293069	0.0409896	0.343926	0.0155353	0.222332	0.124677	-0.120299	0.41031	-0.0370218	0.800617	0.00757513	0.958801	0.114273	0.434314	0.193859	0.18198	0.170643	0.241081	-0.221658	0.125853	-0.191555	0.187331	-0.441174	0.00150876	-0.105533	0.470493	0.610977	3.12433e-06	0.449123	0.00120772	0.454614	0.00103238	-0.22432	0.121255
C1orf122	darkgreen	-0.320359	0.0248242	0.380586	0.0069825	-0.627267	1.41419e-06	0.346145	0.0148383	0.4082	0.00359545	-0.286753	0.0457577	-0.141899	0.330759	0.0190265	0.896757	0.30913	0.030673	0.0117827	0.935957	0.0403184	0.783274	0.0634184	0.665084	-0.467433	0.000708452	-0.757253	3.03879e-10	-0.3012	0.0354586	0.897659	2.41362e-18	0.504834	0.000216318	0.689043	4.40585e-08	-0.362306	0.0105204
XKR8	darkgreen	-0.157659	0.279293	0.402116	0.00418152	-0.571907	1.76499e-05	0.195972	0.177171	0.381583	0.00682371	-0.0387751	0.791381	-0.00905539	0.95076	0.0284219	0.846288	0.243191	0.0922255	0.115243	0.430401	0.142726	0.327921	-0.0527654	0.718792	-0.618098	2.22161e-06	-0.818983	6.43322e-13	-0.163576	0.261414	0.909677	1.46778e-19	0.59978	5.25319e-06	0.755222	3.60581e-10	-0.246855	0.0872752
ERP29	darkgreen	-0.154752	0.288366	0.285028	0.0471354	-0.424976	0.00233641	0.187444	0.197154	0.364954	0.0099278	-0.119177	0.414721	0.00352331	0.980831	-0.104884	0.47324	0.206332	0.154911	0.155653	0.285534	0.215662	0.136688	-0.0948366	0.516867	-0.549286	4.3648e-05	-0.778534	4.54882e-11	-0.124884	0.392565	0.885953	2.6929e-17	0.678113	8.64417e-08	0.700499	2.10531e-08	-0.260295	0.0708703
LOC101928378	darkgreen	-0.394056	0.00508624	0.543962	5.35095e-05	-0.735306	1.77705e-09	0.207753	0.152026	0.614843	2.59897e-06	-0.144414	0.322173	-0.181614	0.211703	0.246283	0.0880331	0.372997	0.00830073	-0.0442195	0.762886	-0.0201585	0.890651	-0.0729902	0.618197	-0.228528	0.11425	-0.732441	2.20952e-09	-0.366064	0.00968813	0.792937	1.1129e-11	0.301639	0.0351785	0.327926	0.0214349	-0.432834	0.00189483
FAM50A	darkgreen	-0.335149	0.0185722	0.229724	0.112315	-0.536703	7.02545e-05	0.342266	0.0160748	0.502479	0.000234048	-0.145734	0.317722	-0.13351	0.360429	0.0412148	0.778576	0.335462	0.0184557	0.0819822	0.575476	0.0580615	0.691904	-0.0815009	0.577728	-0.402971	0.00409441	-0.782497	3.12072e-11	-0.262269	0.068683	0.950624	1.58959e-25	0.531155	8.61456e-05	0.552003	3.92854e-05	-0.371128	0.00865674
ZNF598	darkgreen	-0.346113	0.014848	0.416951	0.00287922	-0.63523	9.43895e-07	0.133617	0.36004	0.545963	4.95865e-05	-0.0727311	0.619447	-0.0955352	0.51377	0.0268764	0.854554	0.376274	0.0077073	-0.0316516	0.829069	-0.0381293	0.794779	0.0344465	0.814231	-0.435031	0.00178546	-0.87348	2.67656e-16	-0.210568	0.146428	0.892416	7.35722e-18	0.454631	0.00103187	0.547514	4.67281e-05	-0.272361	0.0583211
LRG1	darkgreen	-0.248035	0.0857249	0.37071	0.00873796	-0.647667	4.90384e-07	0.283961	0.0480052	0.534938	7.49922e-05	-0.319568	0.0252029	-0.34278	0.015906	0.103731	0.478145	0.511168	0.000174516	-0.118117	0.418911	-0.0308662	0.83325	0.0127233	0.930856	-0.47009	0.000654063	-0.658416	2.7173e-07	-0.463664	0.000792597	0.862343	1.71012e-15	0.354616	0.012417	0.378519	0.00732213	-0.576903	1.43199e-05
NPIPA1	darkgreen	-0.123694	0.397127	0.216143	0.135794	-0.350711	0.0134874	0.239727	0.0971037	0.311267	0.0294792	-0.0499739	0.733104	0.0850823	0.561067	-0.0736243	0.615141	0.168144	0.248144	0.233064	0.107046	0.267835	0.0628011	-0.236474	0.101865	-0.484352	0.000421232	-0.753562	4.14202e-10	-0.0334559	0.819483	0.837488	6.33824e-14	0.713538	8.70077e-09	0.751971	4.72604e-10	-0.159417	0.2739
DUSP23	darkgreen	-0.229934	0.111979	0.29857	0.0371757	-0.562255	2.61841e-05	0.395944	0.00486023	0.501184	0.000244347	-0.156029	0.284357	-0.176898	0.224008	0.178901	0.218725	0.360325	0.0109834	0.162696	0.264023	0.143562	0.325066	-0.191848	0.186644	-0.589829	8.20276e-06	-0.735899	1.69811e-09	-0.309423	0.0305067	0.915094	3.64676e-20	0.542995	5.55053e-05	0.530182	8.92494e-05	-0.465315	0.000754694
RALGDS	darkgreen	-0.436681	0.00170703	-0.0964417	0.509765	-0.436836	0.0016998	0.364778	0.00996625	0.282128	0.0495283	-0.156933	0.281541	-0.179404	0.217411	0.202902	0.16204	0.222639	0.124145	-0.110986	0.447736	-0.185914	0.200902	-0.197315	0.174161	-0.155506	0.285994	-0.545787	4.99199e-05	-0.222793	0.123876	0.727587	3.17561e-09	0.289726	0.0434596	0.379683	0.00712922	-0.296831	0.0383484
KAT5	darkgreen	-0.264372	0.0664109	0.334223	0.0189199	-0.532995	8.05447e-05	0.175848	0.226816	0.545316	5.08252e-05	-0.0446854	0.760461	-0.237667	0.100098	0.155728	0.285299	0.395859	0.00487015	0.0311839	0.831558	0.0681433	0.641767	-0.0786724	0.591043	-0.46629	0.000733093	-0.779921	3.99044e-11	-0.258821	0.0725406	0.918905	1.29356e-20	0.502787	0.000231657	0.413761	0.00312423	-0.414452	0.00306964
GAS6	darkgreen	-0.196543	0.175888	0.0654338	0.655098	-0.31434	0.0278307	0.251212	0.0816604	0.262965	0.0679238	-0.0433426	0.767455	-0.0333045	0.820287	0.0770327	0.598825	0.144354	0.322374	0.152173	0.296575	0.191393	0.18771	-0.27162	0.0590362	-0.440774	0.00152555	-0.623917	1.67066e-06	-0.083595	0.567959	0.79143	1.29616e-11	0.603255	4.48024e-06	0.627916	1.36894e-06	-0.188005	0.195792
HIP1R	darkgreen	-0.409677	0.00346456	0.0443713	0.762096	-0.501852	0.000238985	0.464702	0.000768581	0.322821	0.0236752	-0.276523	0.0544319	-0.198444	0.171661	0.120081	0.411164	0.183831	0.206083	-0.00602354	0.967235	-0.0450745	0.758438	-0.165538	0.255656	-0.241593	0.0944521	-0.574925	1.55623e-05	-0.317929	0.0260031	0.813894	1.16238e-12	0.377509	0.00749327	0.458442	0.000923992	-0.414086	0.00309843
FIBP	darkgreen	0.061889	0.672701	0.418925	0.00273633	-0.402817	0.00410996	-0.00398775	0.978305	0.402208	0.00417209	0.0312808	0.831042	0.0760421	0.603547	-0.075696	0.605201	0.319658	0.0251594	0.320603	0.0247081	0.41128	0.00332728	-0.229488	0.112695	-0.726696	3.39149e-09	-0.82673	2.52096e-13	-0.0342327	0.815364	0.903016	7.2482e-19	0.756959	3.11539e-10	0.650071	4.30605e-07	-0.206699	0.154162
PI4KB	darkgreen	-0.16833	0.247615	0.173231	0.233915	-0.40368	0.00402332	0.275233	0.0556144	0.35143	0.0132847	-0.060841	0.677938	-0.0828217	0.571558	0.070424	0.63063	0.225925	0.118545	0.172505	0.235911	0.125092	0.39177	-0.106398	0.466842	-0.664909	1.88039e-07	-0.713545	8.6968e-09	-0.10773	0.46125	0.841709	3.58707e-14	0.592023	7.44452e-06	0.69631	2.7688e-08	-0.17291	0.234794
TSPO	darkgreen	-0.182626	0.209124	0.158315	0.277273	-0.365455	0.00981905	0.485035	0.000412246	0.338581	0.0173296	-0.286288	0.0461259	-0.301206	0.0354548	0.0801537	0.584053	0.199413	0.169536	-0.0131453	0.928569	0.113899	0.435831	-0.0824947	0.573083	-0.322802	0.0236842	-0.454186	0.00104518	-0.378324	0.00735499	0.774724	6.48778e-11	0.447091	0.0012791	0.32534	0.0225466	-0.585595	9.87117e-06
HSD17B8	darkgreen	-0.207612	0.15231	0.496024	0.000289608	-0.669226	1.46479e-07	0.274254	0.0565254	0.460554	0.000868665	-0.121932	0.403937	-0.105264	0.471629	0.0133084	0.927685	0.360866	0.0108552	0.158915	0.275432	0.121492	0.405649	-0.0179565	0.902535	-0.52858	9.45839e-05	-0.82537	2.98129e-13	-0.269891	0.0607332	0.944412	2.40373e-24	0.543528	5.43964e-05	0.660624	2.40001e-07	-0.345624	0.0149993
AHCY	darkgreen	-0.179026	0.218397	0.398545	0.00456322	-0.528455	9.50109e-05	0.389241	0.00570466	0.474472	0.000572516	-0.245639	0.0888943	-0.32697	0.0218402	0.0971035	0.506851	0.328864	0.0210433	0.0379657	0.795641	0.0908528	0.534706	-0.120515	0.409462	-0.354397	0.0124751	-0.613733	2.74078e-06	-0.415875	0.00295993	0.884686	3.44096e-17	0.451052	0.00114333	0.299922	0.0362845	-0.602212	4.70058e-06
EPHB3	darkgreen	-0.344372	0.0153931	0.412109	0.00325817	-0.670163	1.38672e-07	0.408361	0.00358094	0.430893	0.00199641	-0.213409	0.140934	-0.18482	0.203611	0.209601	0.148333	0.202673	0.162526	-0.0804533	0.582644	-0.0638249	0.663065	-0.0487856	0.739224	-0.431026	0.00198928	-0.766187	1.40272e-10	-0.333904	0.0190411	0.920691	7.82e-21	0.429787	0.0020564	0.570656	1.85887e-05	-0.417559	0.00283458
PPP1R1B	darkgreen	-0.304407	0.0334538	0.171836	0.237759	-0.48565	0.000404311	0.393549	0.00514845	0.383634	0.00650677	-0.308256	0.0311723	-0.302112	0.0348783	0.0967009	0.508623	0.254392	0.0777453	0.0208745	0.886792	0.0619894	0.672199	-0.0414086	0.777561	-0.384036	0.00644611	-0.559203	2.95871e-05	-0.400396	0.00436174	0.868999	5.76147e-16	0.437005	0.00169199	0.415768	0.00296803	-0.534712	7.562e-05
CHPF	darkgreen	-0.362856	0.0103949	0.402925	0.0040991	-0.704779	1.58346e-08	0.228113	0.114926	0.555537	3.42099e-05	-0.127625	0.382174	-0.135908	0.351788	0.208943	0.149641	0.378482	0.00732837	-0.114489	0.433442	-0.00273034	0.985145	-0.186601	0.199212	-0.243678	0.0915549	-0.782577	3.09681e-11	-0.333767	0.0190932	0.866535	8.67687e-16	0.368218	0.00923701	0.408105	0.00360398	-0.409331	0.0034948
ALKBH2	darkgreen	-0.117866	0.419907	0.48482	0.00041506	-0.65626	3.06475e-07	0.0385581	0.792522	0.598807	5.49085e-06	0.101537	0.487552	-0.033167	0.821017	0.0455453	0.755992	0.395871	0.00486876	0.102508	0.483376	0.137568	0.345881	-0.014251	0.922578	-0.541652	5.83919e-05	-0.90219	8.76434e-19	-0.152231	0.296389	0.872794	3.01577e-16	0.507729	0.000196196	0.555317	3.45079e-05	-0.199038	0.170357
SCAND1	darkgreen	-0.360797	0.0108716	0.334642	0.018762	-0.623027	1.74576e-06	0.182645	0.209077	0.515339	0.000151152	-0.109486	0.453934	-0.222381	0.124591	0.163479	0.261701	0.305518	0.0327817	-0.0342719	0.815157	0.0645793	0.659325	-0.229353	0.112913	-0.33095	0.0201941	-0.717963	6.37544e-09	-0.316696	0.0266192	0.893588	5.76346e-18	0.418946	0.00273482	0.32391	0.0231815	-0.452456	0.00109837
CFD	darkgreen	-0.119651	0.412854	0.482879	0.000441212	-0.564718	2.37049e-05	0.383211	0.00657106	0.434307	0.00182087	-0.253308	0.0790636	-0.212187	0.143279	0.0646421	0.659013	0.239836	0.0969468	-0.0408165	0.780662	0.0713136	0.626308	-0.13676	0.348749	-0.556223	3.32978e-05	-0.654746	3.33297e-07	-0.288413	0.0444629	0.789063	1.64268e-11	0.508998	0.000187927	0.378554	0.00731633	-0.483285	0.000435621
SSRP1	darkgreen	-0.122755	0.400748	0.170481	0.241535	-0.319016	0.0254701	0.0802357	0.583667	0.450046	0.00117651	0.0595684	0.68432	0.0317086	0.828766	-0.00795309	0.956748	0.290897	0.0425812	0.129841	0.373898	0.125298	0.390986	-0.0137475	0.925305	-0.46784	0.000699868	-0.832147	1.2733e-13	0.0177717	0.903533	0.81883	6.55031e-13	0.600958	4.97848e-06	0.700112	2.15959e-08	-0.013753	0.925276
DAXX	darkgreen	-0.0694157	0.635544	0.425709	0.00229169	-0.413328	0.00315882	-0.111977	0.443664	0.454841	0.00102564	0.169929	0.243085	0.0824665	0.573214	0.00173075	0.990583	0.276045	0.0548685	0.11472	0.432507	0.210263	0.147027	-0.206294	0.154989	-0.341884	0.0162012	-0.80672	2.59752e-12	-0.0260214	0.859134	0.799584	5.59491e-12	0.539126	6.41967e-05	0.411601	0.00330032	-0.178012	0.221059
BCL2L2	darkgreen	-0.29132	0.0422671	0.0984786	0.500824	-0.407469	0.00366183	0.375144	0.00790759	0.306938	0.0319387	-0.193753	0.182223	-0.0977283	0.504108	0.0121223	0.934115	0.19801	0.172618	0.179799	0.216381	0.133609	0.360072	-0.140981	0.33393	-0.309265	0.0305959	-0.616239	2.43032e-06	-0.204459	0.158774	0.814673	1.06297e-12	0.525228	0.000106699	0.591031	7.77897e-06	-0.313634	0.0282024
JAGN1	darkgreen	-0.0638455	0.662963	0.412328	0.00324009	-0.438005	0.00164632	0.0875447	0.549744	0.345245	0.0151176	-0.08664	0.553892	0.0230021	0.875341	-0.102955	0.48146	0.189549	0.192079	0.122035	0.403537	0.24059	0.0958708	-0.101595	0.487301	-0.58793	8.91566e-06	-0.754987	3.67757e-10	-0.108613	0.457564	0.899985	1.44347e-18	0.672666	1.19686e-07	0.649463	4.45046e-07	-0.282764	0.0489954
ITPK1	darkgreen	-0.255712	0.0761644	0.348331	0.0141777	-0.557583	3.15539e-05	0.184255	0.205021	0.414842	0.00303919	-0.0943762	0.518913	-0.036832	0.801618	0.127615	0.382213	0.213475	0.14081	0.0218312	0.88164	0.0977308	0.504097	-0.200361	0.167474	-0.601516	4.85294e-06	-0.808238	2.19729e-12	-0.160831	0.269612	0.919514	1.09112e-20	0.588481	8.70311e-06	0.652262	3.82099e-07	-0.29354	0.0406508
AVPI1	darkgreen	-0.332783	0.0194721	0.439737	0.00156983	-0.664546	1.91997e-07	0.328161	0.0213361	0.552552	3.84534e-05	-0.179352	0.217546	-0.17565	0.227347	0.168407	0.247395	0.303272	0.0341522	0.0039561	0.978477	0.0130263	0.929214	0.0497642	0.734183	-0.425195	0.002323	-0.752812	4.40852e-10	-0.370919	0.00869726	0.899544	1.59294e-18	0.418963	0.00273365	0.538153	6.65682e-05	-0.459224	0.000903149
ATP6V0E2	darkgreen	-0.323951	0.0231633	0.12426	0.394954	-0.539216	6.39792e-05	0.430801	0.0020013	0.360644	0.0109078	-0.306881	0.0319722	-0.29861	0.037149	0.136572	0.349419	0.295538	0.0392401	0.0279186	0.848978	0.00952243	0.948224	-0.0284374	0.846205	-0.48465	0.000417291	-0.548741	4.45748e-05	-0.409018	0.00352237	0.812926	1.29813e-12	0.393024	0.0052136	0.537992	6.6969e-05	-0.474385	0.000574032
CSNK2B	darkgreen	-0.00603569	0.967169	0.445781	0.00132706	-0.427173	0.00220463	0.0731868	0.617249	0.363786	0.0101855	0.0378005	0.796511	0.153787	0.291421	-0.0569961	0.697284	0.210771	0.146031	0.187424	0.197203	0.266925	0.0637343	-0.199045	0.170342	-0.638234	8.07996e-07	-0.861124	2.07476e-15	-0.00198726	0.989188	0.890256	1.14537e-17	0.735851	1.70438e-09	0.710428	1.07893e-08	-0.155581	0.285759
EFNA1	darkgreen	-0.43163	0.00195728	0.0752089	0.607532	-0.614489	2.64345e-06	0.392039	0.00533772	0.415654	0.00297674	-0.20735	0.152839	-0.176715	0.224497	0.108238	0.459128	0.313001	0.0285391	0.0386182	0.792206	-0.0522966	0.721189	-0.0536659	0.714195	-0.234167	0.105348	-0.668309	1.54513e-07	-0.293067	0.0409908	0.782463	3.13109e-11	0.345223	0.0151246	0.570254	1.89003e-05	-0.295167	0.0394985
FHL2	darkgreen	-0.35285	0.0128916	0.167482	0.250039	-0.587001	9.28529e-06	0.304259	0.0335442	0.473878	0.000583006	-0.156897	0.281653	-0.202516	0.162857	0.00678233	0.96311	0.36831	0.00921825	0.0371118	0.800142	-0.0504091	0.730866	0.0625672	0.669319	-0.445495	0.00133773	-0.840018	4.51497e-14	-0.211923	0.143788	0.856245	4.41462e-15	0.430557	0.00201442	0.688458	4.5711e-08	-0.143738	0.324468
IMP4	darkgreen	-0.199687	0.168939	0.407389	0.00366908	-0.565651	2.28233e-05	0.143312	0.325919	0.463779	0.000789897	0.00237747	0.987065	-0.0241091	0.869392	0.0536544	0.714254	0.32028	0.0248614	0.0815551	0.577474	0.107768	0.461092	-0.118602	0.416991	-0.561681	2.6795e-05	-0.866884	8.19201e-16	-0.185596	0.201687	0.947773	5.76293e-25	0.577557	1.39295e-05	0.663192	2.07454e-07	-0.301318	0.0353828
SNF8	darkgreen	-0.178725	0.219185	0.355157	0.0122747	-0.478525	0.00050536	0.141659	0.331587	0.425789	0.00228689	-0.0934825	0.522897	-0.0443653	0.762127	-0.0356204	0.808019	0.247147	0.0868888	0.162935	0.263311	0.25146	0.0813499	-0.0709838	0.627909	-0.434132	0.00182949	-0.804738	3.22454e-12	-0.163475	0.261713	0.912722	6.78454e-20	0.633534	1.02979e-06	0.674416	1.07886e-07	-0.263967	0.0668435
SULT1A2	darkgreen	-0.275683	0.0551999	0.241884	0.0940426	-0.47813	0.000511572	0.200436	0.167313	0.410532	0.00339066	-0.0127944	0.930471	-0.0576053	0.694206	0.0700093	0.632649	0.233939	0.105698	0.0743384	0.611707	0.102935	0.481546	-0.189494	0.19221	-0.331636	0.0199213	-0.768417	1.15043e-10	-0.14563	0.318072	0.893287	6.13856e-18	0.528744	9.40258e-05	0.596204	6.17625e-06	-0.22433	0.121238
GPD1	darkgreen	-0.270034	0.0605914	0.410172	0.00342165	-0.624456	1.6267e-06	0.220645	0.127636	0.471438	0.000627933	-0.11624	0.426395	-0.247737	0.0861141	0.193598	0.182582	0.324072	0.0231086	-0.075038	0.608351	0.0817077	0.57676	-0.158264	0.277429	-0.534169	7.71467e-05	-0.735031	1.81478e-09	-0.322447	0.0238469	0.903702	6.18186e-19	0.491063	0.000340156	0.460049	0.000881612	-0.453093	0.00107852
FTL	darkgreen	-0.0135123	0.92658	0.182437	0.209606	-0.199129	0.170157	0.28707	0.0455084	0.280339	0.0510534	-0.227215	0.116402	-0.228112	0.114928	-0.000591689	0.996781	0.177389	0.222706	0.167844	0.249003	0.286804	0.0457174	-0.149449	0.305408	-0.364638	0.00999684	-0.375056	0.00792343	-0.283451	0.0484249	0.7228	4.5076e-09	0.514976	0.000153065	0.220344	0.128169	-0.532866	8.09249e-05
PGD	darkgreen	-0.00730838	0.960251	0.285787	0.046525	-0.295081	0.0395588	0.109671	0.453167	0.45726	0.000956322	-0.0645139	0.659649	-0.162227	0.265419	-0.00532851	0.971014	0.290101	0.0431769	0.00549203	0.970125	0.15631	0.28348	-0.0925733	0.526965	-0.407139	0.00369213	-0.614502	2.64179e-06	-0.217275	0.133707	0.800927	4.85437e-12	0.480646	0.000473122	0.244583	0.0903189	-0.400692	0.00433026
CLK2	darkgreen	-0.165528	0.255686	0.156427	0.283116	-0.343701	0.0156077	0.307099	0.0318442	0.371588	0.00856785	-0.178247	0.220439	-0.0787999	0.590441	-9.01948e-05	0.999509	0.22081	0.127345	0.0750318	0.60838	0.143425	0.325531	-0.12401	0.395912	-0.501688	0.000240293	-0.757459	2.98613e-10	-0.0774793	0.596701	0.859814	2.5479e-15	0.645736	5.43923e-07	0.647549	4.93516e-07	-0.188738	0.194024
NFKBIA	darkgreen	-0.184867	0.203495	-0.0303218	0.83615	-0.224844	0.120366	0.0733957	0.616242	0.181683	0.211526	-0.0390932	0.789708	0.0502377	0.731747	-0.0893787	0.541383	0.208537	0.150451	0.194964	0.179452	0.170151	0.242461	-0.339355	0.0170593	-0.270256	0.060372	-0.547606	4.65629e-05	-0.029982	0.837962	0.648221	4.75958e-07	0.495846	0.0002913	0.491873	0.000331401	-0.119439	0.413689
SDHAF1	darkgreen	-0.181133	0.212936	0.377772	0.00744842	-0.561577	2.6907e-05	0.214637	0.138609	0.578843	1.31908e-05	-0.196405	0.176196	-0.267745	0.0628921	0.157558	0.279607	0.367146	0.00945911	0.0641333	0.661535	0.209342	0.148848	-0.15381	0.291346	-0.600055	5.18794e-06	-0.706626	1.39813e-08	-0.341692	0.0162651	0.925501	1.89681e-21	0.524017	0.00011141	0.393323	0.00517641	-0.52097	0.000124127
GMEB2	darkgreen	-0.342372	0.0160399	0.389194	0.00571106	-0.643042	6.2775e-07	0.278411	0.0527385	0.475747	0.000550573	-0.107269	0.463181	-0.108075	0.459808	0.0902798	0.537297	0.287437	0.0452201	-0.0656541	0.65401	-0.0423974	0.77239	-0.0308124	0.833536	-0.440688	0.00152916	-0.845697	2.06282e-14	-0.230512	0.111054	0.917463	1.92615e-20	0.477032	0.000529216	0.644848	5.70323e-07	-0.301982	0.0349605
SMIM22	darkgreen	-0.350575	0.0135261	0.176056	0.226257	-0.561666	2.68115e-05	0.40679	0.00372441	0.387742	0.00591022	-0.33174	0.01988	-0.176907	0.223984	0.0749512	0.608766	0.338286	0.0174338	0.0781116	0.5937	0.0849017	0.561902	-0.0677754	0.64357	-0.434615	0.00180572	-0.591186	7.72577e-06	-0.361907	0.0106124	0.795214	8.81842e-12	0.440269	0.00154695	0.593988	6.82124e-06	-0.456422	0.000979852
COPZ2	darkgreen	-0.409333	0.00349461	0.386036	0.00615184	-0.750077	5.52221e-10	0.506134	0.00020706	0.589374	8.36841e-06	-0.257831	0.0736787	-0.395523	0.00490979	0.208557	0.150412	0.422512	0.00249257	-0.144725	0.321119	-0.193348	0.183157	0.189099	0.193157	-0.401817	0.00421234	-0.726799	3.36573e-09	-0.503725	0.000224513	0.905332	4.21631e-19	0.282542	0.0491808	0.413003	0.00318504	-0.541775	5.81226e-05
NME4	darkgreen	-0.326143	0.0221962	0.436306	0.00172457	-0.685991	5.33356e-08	0.418388	0.0027746	0.51686	0.000143369	-0.269008	0.0616145	-0.300851	0.0356823	0.142586	0.328402	0.312395	0.0288647	-0.15574	0.285263	-0.083008	0.57069	0.0609329	0.677479	-0.420061	0.00265695	-0.725967	3.57818e-09	-0.452358	0.00110147	0.930671	3.70764e-22	0.405162	0.00387841	0.473052	0.000597875	-0.573166	1.67497e-05
HAX1	darkgreen	-0.0631683	0.666327	0.426677	0.00223377	-0.498954	0.000263061	0.205216	0.157206	0.376359	0.00769239	-0.102126	0.485018	-0.0260978	0.858724	-0.0540446	0.712265	0.264871	0.065881	0.220237	0.12836	0.284115	0.0478786	-0.11189	0.444022	-0.605173	4.10016e-06	-0.761554	2.1032e-10	-0.180903	0.213528	0.912401	7.3697e-20	0.661292	2.31107e-07	0.689879	4.17949e-08	-0.318741	0.0256041
GPC1	darkgreen	-0.499842	0.000255457	0.213873	0.140052	-0.686841	5.05839e-08	0.382234	0.00672165	0.572754	1.70392e-05	-0.273524	0.0572129	-0.376434	0.00767914	0.231389	0.109665	0.322807	0.0236816	-0.172589	0.235679	-0.13039	0.371864	-0.0454045	0.756724	-0.276118	0.0548015	-0.713557	8.68955e-09	-0.437083	0.00168839	0.899079	1.76617e-18	0.303452	0.0340404	0.331563	0.0199501	-0.503801	0.000223943
NINJ1	darkgreen	-0.173817	0.232312	0.371564	0.00857248	-0.532427	8.22367e-05	0.274637	0.0561674	0.467975	0.000697036	-0.15046	0.30211	-0.144291	0.32259	-0.0460303	0.753475	0.278995	0.0522233	0.150678	0.301402	0.173956	0.231932	-0.145517	0.318452	-0.616603	2.38809e-06	-0.756006	3.37616e-10	-0.243128	0.0923122	0.922533	4.59538e-21	0.600161	5.16302e-06	0.509741	0.000183232	-0.394932	0.00498023
LZTS3	darkgreen	-0.236181	0.102303	0.352937	0.0128681	-0.611856	2.99681e-06	0.309853	0.0302645	0.426366	0.00225226	-0.190263	0.190379	-0.103986	0.477057	0.0422464	0.773179	0.290835	0.0426275	0.00899474	0.951089	0.0799659	0.584937	-0.0635529	0.664416	-0.572851	1.69705e-05	-0.814259	1.11477e-12	-0.279728	0.0515825	0.946014	1.23091e-24	0.564218	2.41903e-05	0.704992	1.56097e-08	-0.370459	0.00878729
SHMT2	darkgreen	-0.26306	0.0678207	0.423137	0.0024521	-0.718932	5.95129e-09	0.239648	0.0972177	0.606197	3.90971e-06	-0.263353	0.067504	-0.44274	0.00144466	0.0942837	0.519325	0.542141	5.73254e-05	-0.0659017	0.652788	-0.0235245	0.872533	0.166473	0.252943	-0.274974	0.0558543	-0.642547	6.44403e-07	-0.48724	0.000384416	0.812183	1.41242e-12	0.247372	0.0865927	0.216064	0.135941	-0.544256	5.29164e-05
DNAJB1	darkgreen	-0.210786	0.146002	0.153584	0.292066	-0.349075	0.013959	0.173539	0.233069	0.295862	0.0390148	-0.144554	0.321699	-0.0998732	0.494749	0.0179345	0.902653	0.205524	0.15657	0.230393	0.111245	0.225654	0.119	-0.121728	0.404731	-0.462465	0.000821192	-0.640261	7.26825e-07	-0.14615	0.316329	0.828387	2.05083e-13	0.58428	1.04496e-05	0.61196	2.98213e-06	-0.261971	0.0690088
APRT	darkgreen	-0.248906	0.0845953	0.30364	0.0339243	-0.578031	1.36532e-05	0.361942	0.0106041	0.395721	0.0048864	-0.163255	0.262364	-0.204534	0.15862	0.100287	0.492954	0.302211	0.0348163	0.0134144	0.92711	0.0732623	0.616885	-0.0314557	0.830112	-0.484773	0.000415677	-0.731576	2.35826e-09	-0.298975	0.0369072	0.933696	1.344e-22	0.533945	7.77841e-05	0.588977	8.51571e-06	-0.424208	0.00238412
TNXA	darkgreen	-0.359984	0.0110648	0.285457	0.0467899	-0.597035	5.9494e-06	0.313717	0.0281582	0.575526	1.51746e-05	-0.0309628	0.832735	-0.232523	0.107887	0.109887	0.452273	0.339472	0.017019	-0.0609983	0.677151	-0.0959726	0.511836	0.087701	0.54903	-0.32663	0.0219862	-0.815617	9.53294e-13	-0.293172	0.0409151	0.914761	3.98322e-20	0.405723	0.00382468	0.443555	0.00141224	-0.376006	0.00775437
SH3GL1	darkgreen	-0.247661	0.0862139	0.513225	0.000162613	-0.701749	1.9382e-08	0.215897	0.136252	0.600014	5.19756e-06	-0.107246	0.463277	-0.128369	0.379386	0.183062	0.20802	0.374914	0.00794896	-0.119338	0.414085	0.0211251	0.885442	-0.0397186	0.786422	-0.531023	8.65606e-05	-0.862534	1.6591e-15	-0.294626	0.0398787	0.938454	2.46263e-23	0.489291	0.000360061	0.531919	8.37774e-05	-0.403652	0.00402615
NCR2	darkgreen	-0.244677	0.0901918	0.550934	4.09508e-05	-0.671637	1.27172e-07	0.0651202	0.656648	0.529663	9.09467e-05	0.0347216	0.812775	-0.0419941	0.774498	0.0708695	0.628465	0.326712	0.0219508	0.0167359	0.909131	0.0833159	0.569257	-0.0365552	0.803079	-0.41313	0.0031748	-0.871779	3.59295e-16	-0.213436	0.140883	0.872393	3.23247e-16	0.451108	0.00114147	0.573553	1.64811e-05	-0.243204	0.0922073
NSUN5P1	darkgreen	-0.318755	0.0255975	-0.0893915	0.541324	-0.325468	0.0224903	0.390956	0.00547729	0.278346	0.0527958	-0.175731	0.22713	-0.0790051	0.58947	-0.0065016	0.964636	0.17502	0.229044	0.100576	0.491702	0.0315149	0.829796	-0.144431	0.322115	-0.340553	0.0166481	-0.610715	3.16323e-06	-0.106062	0.468258	0.745324	8.11365e-10	0.490078	0.000351095	0.6535	3.56995e-07	-0.138586	0.342288
AMIGO3	darkgreen	-0.281145	0.0503618	0.496173	0.000288207	-0.614304	2.66698e-06	0.258077	0.0733946	0.478779	0.000501401	-0.213878	0.140043	-0.171389	0.239	0.0204071	0.889311	0.359002	0.0113024	0.0200043	0.891482	0.0907203	0.535305	-0.144112	0.323196	-0.491727	0.000332965	-0.817773	7.41689e-13	-0.321589	0.0242442	0.940163	1.29477e-23	0.51001	0.000181564	0.544882	5.16716e-05	-0.432989	0.00188694
SPATA20	darkgreen	-0.279253	0.0519974	0.165829	0.254811	-0.485184	0.00041031	0.27235	0.0583316	0.441037	0.00151449	-0.163994	0.260179	-0.154325	0.289717	0.0846528	0.563053	0.303218	0.0341858	-0.0566127	0.699224	0.0171268	0.907017	-0.171495	0.238707	-0.430727	0.00200529	-0.753821	4.05368e-10	-0.227508	0.115919	0.920196	9.00114e-21	0.530865	8.70601e-05	0.496548	0.000284696	-0.345233	0.0151213
AIP	darkgreen	-0.113664	0.436787	0.414009	0.00310452	-0.434787	0.00179729	-0.057163	0.69644	0.372048	0.00847991	0.092923	0.525399	0.0908933	0.534523	-0.0186294	0.898901	0.231454	0.109561	0.0988987	0.49899	0.232595	0.107774	-0.204301	0.159104	-0.499524	0.000258158	-0.879645	8.87974e-17	0.0219934	0.880766	0.895596	3.76885e-18	0.667279	1.64028e-07	0.600659	5.04697e-06	-0.125607	0.389808
IMPA2	darkgreen	-0.421557	0.00255547	0.352442	0.0130037	-0.712316	9.47135e-09	0.306235	0.0323535	0.592663	7.23583e-06	-0.321944	0.0240794	-0.314155	0.0279275	0.0772034	0.598013	0.471475	0.000627227	-0.105904	0.468925	-0.0497239	0.73439	0.115347	0.429979	-0.359616	0.0111533	-0.736164	1.66398e-09	-0.436757	0.0017035	0.869459	5.33201e-16	0.379635	0.0071371	0.398445	0.00457439	-0.51492	0.000153364
CDK16	darkgreen	-0.37336	0.00823311	0.336154	0.0182008	-0.662295	2.18323e-07	0.366618	0.00957032	0.540407	6.11886e-05	-0.168921	0.245933	-0.364222	0.0100886	0.287544	0.0451366	0.405229	0.00387188	-0.127525	0.382554	-0.0993045	0.497222	0.00902533	0.950923	-0.430697	0.00200691	-0.736122	1.66929e-09	-0.417789	0.00281781	0.908065	2.1846e-19	0.366814	0.00952884	0.407973	0.00361593	-0.496691	0.000283364
SEMA4A	darkgreen	-0.0363665	0.804076	0.416048	0.00294679	-0.489468	0.000358026	0.256933	0.0747248	0.371871	0.00851357	-0.0994764	0.496474	0.0218361	0.881613	-0.0394649	0.787755	0.243802	0.0913853	0.177618	0.222098	0.189829	0.191411	-0.151659	0.298229	-0.710276	1.09027e-08	-0.778835	4.42183e-11	-0.140353	0.336108	0.90557	3.98522e-19	0.659563	2.54791e-07	0.639912	7.40215e-07	-0.296028	0.0388998
DALRD3	darkgreen	-0.241668	0.0943466	0.416839	0.00288755	-0.599552	5.3082e-06	0.310777	0.0297493	0.449503	0.00119479	-0.194022	0.181606	-0.18796	0.195902	0.0641881	0.661263	0.279229	0.0520178	-0.0517553	0.72396	0.000315864	0.998281	-0.225782	0.118785	-0.358432	0.0114422	-0.673762	1.12163e-07	-0.332034	0.0197643	0.872614	3.11111e-16	0.448976	0.00121276	0.324582	0.0228813	-0.526096	0.000103433
CD81	darkgreen	-0.079842	0.585521	0.173777	0.232421	-0.306109	0.0324284	0.334091	0.0189701	0.327108	0.0217814	-0.206793	0.153972	-0.18067	0.214129	-0.0239313	0.870347	0.219236	0.130149	0.214395	0.139064	0.266989	0.0636684	-0.136852	0.348423	-0.567312	2.13288e-05	-0.567431	2.12247e-05	-0.21934	0.129963	0.822751	4.10171e-13	0.648124	4.78442e-07	0.517823	0.000138633	-0.403553	0.00403605
UQCRC1	darkgreen	-0.182045	0.210603	0.22532	0.119562	-0.421591	0.00255325	0.335211	0.0185489	0.308435	0.0310695	-0.245628	0.0889096	-0.175017	0.229052	-0.000130323	0.999291	0.239789	0.097015	0.195362	0.178549	0.182187	0.210241	-0.118342	0.418019	-0.518403	0.000135845	-0.637564	8.36596e-07	-0.258458	0.0729567	0.873074	2.87291e-16	0.593358	7.01566e-06	0.569254	1.96957e-05	-0.397833	0.00464295
EIF6	darkgreen	-0.20341	0.16097	0.413745	0.00312551	-0.562276	2.6162e-05	0.191157	0.188267	0.483446	0.000433415	-0.000443431	0.997587	-0.0678881	0.643017	0.0460167	0.753546	0.341188	0.0164337	0.139283	0.339843	0.134175	0.35802	-0.127254	0.383573	-0.567448	2.12105e-05	-0.874151	2.38051e-16	-0.163655	0.261179	0.941722	7.0844e-24	0.592414	7.31645e-06	0.598727	5.51091e-06	-0.274993	0.0558365
SYNE4	darkgreen	-0.469744	0.00066093	0.432108	0.00193226	-0.825076	3.09086e-13	0.449861	0.00118271	0.674821	1.05313e-07	-0.326665	0.0219711	-0.447455	0.00126604	0.182103	0.210454	0.414516	0.00306464	-0.293856	0.0404249	-0.22404	0.121733	0.220377	0.128112	-0.336396	0.0181124	-0.742287	1.03291e-09	-0.558298	3.06713e-05	0.894834	4.43283e-18	0.228718	0.11394	0.371643	0.00855734	-0.591081	7.76179e-06
MEPCE	darkgreen	-0.0699283	0.633044	0.389248	0.00570368	-0.426253	0.00225899	0.0303819	0.835829	0.358542	0.0114149	0.023046	0.875104	0.0815448	0.577523	-0.0820122	0.575336	0.20874	0.150047	0.279814	0.0515073	0.362289	0.0105244	-0.216037	0.135991	-0.640054	7.34752e-07	-0.774009	6.92921e-11	-0.0558727	0.702973	0.890574	1.07383e-17	0.734498	1.89019e-09	0.635143	9.48166e-07	-0.24973	0.083537
WASF2	darkgreen	-0.223872	0.122021	0.0832927	0.569364	-0.347269	0.0144954	0.379608	0.00714145	0.336582	0.0180443	-0.279637	0.0516615	-0.126589	0.386085	-0.0115315	0.937319	0.182836	0.208593	0.173828	0.23228	0.174912	0.229338	-0.168971	0.245792	-0.525849	0.000104353	-0.583616	1.07538e-05	-0.243111	0.0923365	0.833659	1.04776e-13	0.589759	8.22784e-06	0.597581	5.80451e-06	-0.385157	0.00627968
DLK1	darkgreen	-0.54536	5.07399e-05	0.597127	5.92459e-06	-0.847624	1.57009e-14	0.355298	0.0122377	0.502806	0.000231513	-0.34534	0.015088	-0.342502	0.0159971	0.207781	0.151971	0.378685	0.00729439	-0.0460985	0.753121	-0.154499	0.289165	0.129303	0.375897	-0.234595	0.104696	-0.654648	3.35104e-07	-0.527944	9.67815e-05	0.79602	8.11519e-12	0.152887	0.294289	0.443718	0.00140586	-0.479305	0.000493276
CCS	darkgreen	-0.205147	0.157347	0.279076	0.0521519	-0.501683	0.000240336	0.218616	0.131267	0.526308	0.00010265	-0.192832	0.184351	-0.179935	0.216028	-0.0187677	0.898154	0.366642	0.00956526	-0.0384688	0.792992	0.100257	0.493083	-0.134851	0.355581	-0.433555	0.0018583	-0.75833	2.77319e-10	-0.256346	0.0754141	0.92605	1.60422e-21	0.54391	5.36157e-05	0.430308	0.00202792	-0.41673	0.00289563
CIDEC	darkgreen	-0.213164	0.141401	0.423665	0.00241838	-0.635564	9.27804e-07	0.19936	0.169651	0.480183	0.000480002	-0.159875	0.272506	-0.252571	0.0799684	0.0934573	0.52301	0.373701	0.00817003	-0.106491	0.466449	0.02728	0.852394	-0.0937158	0.521856	-0.542727	5.60709e-05	-0.677135	9.16891e-08	-0.358213	0.0114961	0.780703	3.70472e-11	0.421477	0.00256086	0.324702	0.0228277	-0.507895	0.000195099
SLC35A4	darkgreen	-0.0294985	0.84054	0.334063	0.0189807	-0.39262	0.00526425	0.29237	0.0414965	0.451892	0.00111623	-0.152694	0.294905	-0.0882197	0.54666	-0.0840624	0.565789	0.298547	0.0371907	0.0438164	0.764985	0.0949754	0.516251	-0.0922804	0.528279	-0.682025	6.81395e-08	-0.74586	7.77249e-10	-0.189268	0.192752	0.889382	1.36638e-17	0.628054	1.35944e-06	0.502558	0.000233437	-0.397194	0.00471548
DHRS13	darkgreen	-0.338441	0.017379	0.392444	0.00528646	-0.654354	3.40588e-07	0.326075	0.0222256	0.594326	6.71886e-06	-0.162743	0.263882	-0.218706	0.131104	0.0674574	0.645131	0.395357	0.00492949	-0.0300019	0.837855	-0.0837623	0.567182	0.0428198	0.770184	-0.434808	0.00179629	-0.824701	3.236e-13	-0.30108	0.0355354	0.923494	3.46428e-21	0.448899	0.0012154	0.47653	0.000537465	-0.415779	0.00296718
CRYL1	darkgreen	-0.24327	0.0921169	0.451173	0.00113938	-0.646094	5.33586e-07	0.132396	0.364486	0.535067	7.46366e-05	-0.0903855	0.536818	-0.160018	0.272072	0.168585	0.246887	0.393833	0.00511352	0.0299708	0.838021	0.0256576	0.861083	0.0537282	0.713878	-0.553282	3.73736e-05	-0.826708	2.52776e-13	-0.263228	0.0676393	0.876816	1.48405e-16	0.4385	0.00162411	0.61217	2.95261e-06	-0.295917	0.0389766
DNASE1L1	darkgreen	-0.0924401	0.527563	0.52296	0.00011568	-0.551902	3.94404e-05	0.090923	0.534389	0.42982	0.00205457	-0.0844424	0.564028	0.013755	0.925265	-0.00720234	0.960827	0.30383	0.0338074	0.113486	0.437508	0.259829	0.0713955	-0.23004	0.111808	-0.630936	1.17547e-06	-0.870705	4.31746e-16	-0.12561	0.389796	0.937863	3.06224e-23	0.673531	1.13706e-07	0.672572	1.20348e-07	-0.246845	0.0872878
MEGF8	darkgreen	-0.418186	0.00278909	0.321608	0.0242353	-0.723211	4.37539e-09	0.40186	0.00420794	0.541667	5.83583e-05	-0.267625	0.0630151	-0.334765	0.0187156	0.28816	0.0446581	0.3885	0.00580553	-0.0824409	0.573334	-0.144381	0.322284	-0.0688039	0.638533	-0.42278	0.00247516	-0.698163	2.45417e-08	-0.454366	0.00103979	0.89582	3.59218e-18	0.293265	0.0408483	0.3676	0.00936452	-0.513811	0.00015936
MIR4784	darkgreen	-0.19616	0.176748	0.288389	0.0444809	-0.527982	9.66499e-05	0.265861	0.0648393	0.360987	0.0108267	-0.1724	0.236198	-0.139072	0.340581	-0.00229269	0.987526	0.260758	0.0703523	0.110951	0.447878	0.191738	0.186902	-0.115503	0.429352	-0.522817	0.000116272	-0.706692	1.39196e-08	-0.238601	0.0987317	0.901208	1.09609e-18	0.605348	4.06718e-06	0.61738	2.30017e-06	-0.364647	0.00999499
RPS6KA1	darkgreen	-0.162509	0.264579	0.417885	0.00281085	-0.528673	9.42678e-05	0.131388	0.368182	0.530797	8.72778e-05	-0.0654795	0.654872	-0.142849	0.327501	0.0709301	0.62817	0.328653	0.0211308	0.0191382	0.896154	0.128416	0.379209	-0.132286	0.364891	-0.262896	0.0679993	-0.741957	1.06014e-09	-0.238217	0.0992919	0.856255	4.40775e-15	0.483614	0.000431128	0.301723	0.035125	-0.426053	0.00227096
RABAC1	darkgreen	-0.442653	0.00144816	0.121189	0.406831	-0.494762	0.000301785	0.413964	0.00310808	0.510603	0.000177923	-0.383458	0.0065334	-0.477968	0.000514139	0.126947	0.384729	0.373445	0.00821731	-0.12512	0.391664	-0.0354705	0.808811	0.00224926	0.987762	-0.142915	0.327272	-0.488438	0.000370014	-0.484507	0.00041917	0.810431	1.72092e-12	0.315745	0.0271029	0.121418	0.405937	-0.675472	1.013e-07
EIF2B4	darkgreen	-0.162503	0.264596	0.27397	0.0567918	-0.451057	0.00114313	0.198641	0.171226	0.417189	0.00286166	-0.0466868	0.750072	-0.0805453	0.582211	0.0637925	0.663226	0.274142	0.0566307	0.135611	0.352852	0.170434	0.241668	-0.19822	0.172156	-0.556243	3.32705e-05	-0.82765	2.24864e-13	-0.120479	0.409603	0.930803	3.55084e-22	0.628545	1.32637e-06	0.649886	4.34952e-07	-0.220366	0.128131
HS6ST1	darkgreen	-0.173963	0.231913	0.382752	0.00664138	-0.564335	2.40759e-05	0.193162	0.183587	0.418365	0.00277621	-0.010322	0.943883	-0.0171021	0.907151	0.00342027	0.981392	0.228653	0.114046	0.122287	0.402558	0.108996	0.45597	-0.0639953	0.662219	-0.605949	3.9552e-06	-0.866855	8.23205e-16	-0.151547	0.29859	0.93057	3.83248e-22	0.601655	4.82214e-06	0.762392	1.956e-10	-0.219022	0.130535
BEND4	darkgreen	0.532948	8.06836e-05	-0.546788	4.8046e-05	0.885063	3.19981e-17	-0.429017	0.00209913	-0.684326	5.91402e-08	0.450021	0.00117736	0.628012	1.36234e-06	-0.374449	0.008033	-0.503175	0.000228674	0.294877	0.0397024	0.214712	0.138467	-0.215455	0.137074	0.318866	0.025543	0.679923	7.74684e-08	0.61765	2.27028e-06	-0.787762	1.86877e-11	-0.091342	0.532499	-0.334922	0.0186571	0.504247	0.000220624
RGL2	darkgreen	-0.306898	0.0319619	0.129126	0.376556	-0.516837	0.000143483	0.390288	0.00556484	0.384866	0.00632249	-0.164946	0.257385	-0.129426	0.375441	0.0761763	0.602906	0.236504	0.10182	0.111562	0.445366	0.0862105	0.555866	-0.102355	0.484033	-0.365838	0.00973654	-0.70533	1.52593e-08	-0.226183	0.118115	0.859647	2.61524e-15	0.530184	8.92433e-05	0.650504	4.20575e-07	-0.308718	0.0309072
ABHD14A	darkgreen	-0.263197	0.0676723	0.349963	0.0137012	-0.541072	5.9681e-05	0.222134	0.125021	0.534634	7.58362e-05	-0.153939	0.290937	-0.328543	0.0211766	0.163431	0.261843	0.323626	0.0233096	-0.187232	0.19767	0.00309937	0.983138	-0.0338427	0.817432	-0.412121	0.00325713	-0.626173	1.4936e-06	-0.382907	0.00661758	0.843741	2.7112e-14	0.391392	0.00542072	0.261552	0.069471	-0.563192	2.52143e-05
PHB	darkgreen	-0.145092	0.31988	0.332906	0.0194243	-0.445475	0.00133849	0.066537	0.649657	0.438948	0.00160428	-0.170727	0.240847	-0.170601	0.2412	-0.00584198	0.968222	0.352147	0.013085	0.10769	0.461416	0.237691	0.100062	-0.210127	0.147295	-0.497455	0.000276358	-0.691037	3.88386e-08	-0.218605	0.131286	0.887327	2.05753e-17	0.570783	1.84916e-05	0.411306	0.00332508	-0.375747	0.00780005
AP1M2	darkgreen	-0.483532	0.000432243	0.28328	0.0485668	-0.681243	7.1482e-08	0.474495	0.000572103	0.608529	3.50618e-06	-0.328248	0.0212997	-0.518603	0.000134896	0.271034	0.0596069	0.47586	0.000548659	-0.195788	0.177586	-0.189751	0.191597	0.114418	0.433729	-0.236224	0.102237	-0.629891	1.23934e-06	-0.563331	2.50727e-05	0.884682	3.44381e-17	0.240245	0.0963613	0.240513	0.0959805	-0.654706	3.34036e-07
ZNF32	darkgreen	-0.116648	0.424763	0.346852	0.0146218	-0.520514	0.000126136	0.188441	0.19474	0.425994	0.0022745	-0.166477	0.252934	-0.129475	0.375259	0.0247527	0.865937	0.338585	0.0173282	0.0551433	0.706675	0.0987893	0.499467	-0.0282126	0.847407	-0.622192	1.81905e-06	-0.75984	2.43776e-10	-0.199223	0.169951	0.866812	8.28975e-16	0.540834	6.02164e-05	0.645287	5.57129e-07	-0.230781	0.110627
SLC4A2	darkgreen	-0.344618	0.0153151	0.311466	0.0293697	-0.608428	3.52283e-06	0.300625	0.0358283	0.565718	2.27615e-05	-0.253374	0.0789827	-0.293205	0.0408912	0.134021	0.358576	0.327421	0.0216481	-0.154508	0.289136	-0.0824314	0.573378	-0.0374865	0.798166	-0.366504	0.0095944	-0.691102	3.86783e-08	-0.394292	0.00505746	0.856083	4.52473e-15	0.357018	0.0117953	0.242389	0.0933376	-0.538332	6.61259e-05
HDAC3	darkgreen	-0.235954	0.102642	0.255192	0.0767841	-0.502986	0.000230127	0.398902	0.00452373	0.394256	0.00506182	-0.22302	0.123485	-0.204637	0.158406	0.137873	0.344804	0.258427	0.0729922	0.167928	0.248761	0.105391	0.471094	-0.14422	0.32283	-0.574826	1.56267e-05	-0.697215	2.61074e-08	-0.249733	0.0835341	0.883228	4.54668e-17	0.57288	1.69506e-05	0.594868	6.55783e-06	-0.376209	0.00771865
C14orf159	darkgreen	-0.225565	0.119149	0.32342	0.0234025	-0.458283	0.000928273	0.193234	0.183421	0.38569	0.00620185	-0.132978	0.362365	-0.0131638	0.928469	-0.0322997	0.825623	0.256172	0.0756197	0.158856	0.275614	0.153974	0.290827	-0.0764663	0.601523	-0.544265	5.28968e-05	-0.831895	1.31506e-13	-0.0869661	0.552395	0.889193	1.41932e-17	0.604943	4.14417e-06	0.734695	1.86194e-09	-0.135614	0.352839
DMAP1	darkgreen	-0.203971	0.159793	0.360721	0.0108895	-0.541801	5.80644e-05	0.0583027	0.690688	0.544085	5.32613e-05	-0.0467464	0.749763	-0.131327	0.368408	0.0167443	0.909085	0.378341	0.00735206	0.0572411	0.696045	0.127581	0.382342	0.0160264	0.912968	-0.463574	0.000794712	-0.860693	2.2204e-15	-0.155043	0.28745	0.905937	3.65172e-19	0.537357	6.85695e-05	0.552704	3.82271e-05	-0.207571	0.152394
MGLL	darkgreen	-0.265078	0.0656614	0.241789	0.0941757	-0.485272	0.000409168	0.358108	0.0115224	0.39953	0.004455	-0.275829	0.0550662	-0.291439	0.0421793	0.0429645	0.769428	0.271481	0.0591711	0.0179511	0.902564	0.0983302	0.501473	-0.11932	0.414156	-0.390468	0.00554118	-0.628535	1.32703e-06	-0.362313	0.0105189	0.885453	2.96746e-17	0.490843	0.000342578	0.464045	0.000783704	-0.500986	0.000245961
NDRG1	darkgreen	-0.212613	0.142459	0.0258518	0.860042	-0.347225	0.0145088	0.387651	0.00592279	0.320564	0.0247267	-0.158174	0.277706	-0.077506	0.596574	-0.0382131	0.794338	0.221938	0.125363	0.109236	0.454971	0.113682	0.436711	-0.100531	0.491897	-0.380778	0.00695171	-0.592828	7.18292e-06	-0.154066	0.290535	0.693114	3.40195e-08	0.541322	5.91225e-05	0.610623	3.17703e-06	-0.25798	0.0735068
CYB5R1	darkgreen	-0.17925	0.217812	0.401428	0.00425281	-0.573777	1.63282e-05	0.230985	0.110303	0.452214	0.00110601	-0.00475959	0.974107	-0.107294	0.463078	0.0824607	0.573241	0.345267	0.0151108	0.0585424	0.68948	0.0506157	0.729805	-0.0540672	0.71215	-0.608672	3.48276e-06	-0.88751	1.9843e-17	-0.183792	0.206182	0.925484	1.90659e-21	0.568126	2.06298e-05	0.632282	1.09777e-06	-0.282507	0.0492104
TMEM125	darkgreen	-0.390278	0.00556624	0.30348	0.0340233	-0.66867	1.51296e-07	0.430033	0.0020429	0.46923	0.000671241	-0.326388	0.0220901	-0.291753	0.0419479	0.101922	0.485893	0.372695	0.00835735	-0.0408833	0.780312	-0.0367663	0.801965	0.0496888	0.734571	-0.435972	0.00174033	-0.740123	1.22436e-09	-0.41715	0.00286452	0.930462	3.97035e-22	0.439241	0.00159141	0.598707	5.51593e-06	-0.477238	0.000525872
SF3B5	darkgreen	-0.108399	0.458453	0.426798	0.00222664	-0.544144	5.31407e-05	0.0821196	0.574834	0.414493	0.00306644	-0.00424607	0.9769	0.0721074	0.622462	-0.0426981	0.770819	0.292549	0.041366	0.189736	0.191632	0.265549	0.0651654	-0.113661	0.436796	-0.638671	7.8981e-07	-0.848303	1.42476e-14	-0.101697	0.486861	0.908444	1.99094e-19	0.693005	3.42585e-08	0.732886	2.13638e-09	-0.237246	0.100719
TLE2	darkgreen	-0.515604	0.00014977	-0.00995145	0.945894	-0.573017	1.68537e-05	0.504687	0.00021739	0.399593	0.00444816	-0.369407	0.00899592	-0.374975	0.00793797	0.173725	0.232562	0.220795	0.127372	-0.219055	0.130475	-0.178157	0.220676	0.01224	0.933477	-0.00438818	0.976127	-0.465665	0.00074687	-0.495752	0.000292194	0.775571	5.99873e-11	0.195174	0.178977	0.252897	0.0795677	-0.59262	7.24994e-06
BABAM1	darkgreen	-0.173964	0.231911	0.264623	0.0661434	-0.4148	0.00304249	0.104083	0.476644	0.371203	0.00864207	-0.159334	0.274153	-0.0389123	0.790659	-0.139726	0.338295	0.241396	0.0947297	0.177369	0.222759	0.271232	0.0594137	-0.0909891	0.534091	-0.466412	0.000730412	-0.734474	1.89356e-09	-0.107441	0.462461	0.872812	3.00641e-16	0.668153	1.55918e-07	0.586085	9.663e-06	-0.256213	0.0755704
FXYD2	darkgreen	-0.479535	0.000489768	0.20986	0.147822	-0.690949	3.90561e-08	0.50296	0.000230325	0.415946	0.00295451	-0.452432	0.00109913	-0.287612	0.0450841	0.141406	0.332459	0.277244	0.0537803	-0.191432	0.18762	-0.167344	0.250434	0.0408308	0.780588	-0.299879	0.0363127	-0.663858	1.99713e-07	-0.444825	0.00136305	0.826232	2.68101e-13	0.305263	0.0329348	0.597453	5.83804e-06	-0.431898	0.00194321
USF2	darkgreen	-0.345733	0.0149656	0.446834	0.00128837	-0.668735	1.50732e-07	0.334985	0.0186335	0.486231	0.000396939	-0.220767	0.12742	-0.221006	0.127	0.217727	0.132881	0.30302	0.0343091	-0.230782	0.110625	-0.142158	0.329868	-0.0614901	0.674692	-0.488098	0.000374047	-0.83014	1.64453e-13	-0.343142	0.0157881	0.928702	7.00426e-22	0.401921	0.00420165	0.558091	3.09247e-05	-0.41092	0.00335764
PEF1	darkgreen	-0.00127226	0.993078	0.372579	0.00837927	-0.42892	0.00210456	0.162605	0.264293	0.430798	0.00200148	-0.0565194	0.699696	-0.0491363	0.737416	0.0397102	0.786466	0.313986	0.0280165	0.243719	0.0914988	0.281041	0.0504505	-0.239528	0.0973901	-0.722848	4.49201e-09	-0.780052	3.94114e-11	-0.112127	0.443053	0.893732	5.59203e-18	0.675737	9.97106e-08	0.551391	4.02315e-05	-0.274181	0.0565946
COMMD4	darkgreen	-0.0858201	0.557663	0.423172	0.00244984	-0.500996	0.000245882	0.140684	0.334959	0.48978	0.000354464	-0.125783	0.389138	-0.0928055	0.525925	-0.192404	0.185346	0.318426	0.0257583	0.170232	0.242233	0.259934	0.0712763	-0.104003	0.476988	-0.464085	0.000782768	-0.704656	1.59664e-08	-0.233479	0.106406	0.877681	1.27019e-16	0.606647	3.82865e-06	0.39318	0.00519416	-0.430079	0.00204042
GANAB	darkgreen	-0.201045	0.166	0.361182	0.010781	-0.537632	6.78734e-05	0.286399	0.0460376	0.447608	0.00126059	-0.140574	0.335341	-0.110587	0.449378	0.0350448	0.811063	0.297059	0.0381929	0.0517542	0.723966	0.124037	0.395807	-0.0574519	0.69498	-0.501468	0.000242053	-0.809335	1.9451e-12	-0.239526	0.0973927	0.932176	2.25071e-22	0.608123	3.57357e-06	0.658346	2.72796e-07	-0.371915	0.00850531
CRB3	darkgreen	-0.31972	0.0251296	0.554084	3.62181e-05	-0.760621	2.2796e-10	0.182854	0.208548	0.580176	1.24633e-05	-0.026279	0.857753	-0.150803	0.300996	0.216067	0.135935	0.414125	0.00309533	-0.139078	0.34056	-0.0331033	0.821355	0.016204	0.912007	-0.476077	0.000545004	-0.874637	2.1858e-16	-0.323245	0.0234819	0.918758	1.34747e-20	0.396242	0.00482541	0.603036	4.52578e-06	-0.35351	0.0127126
TUSC2	darkgreen	-0.317334	0.0262991	0.535844	7.25258e-05	-0.749806	5.64618e-10	0.0822558	0.574198	0.589064	8.4833e-06	-0.0115445	0.937249	-0.0937439	0.52173	0.104966	0.472895	0.46132	0.000849346	-0.0210899	0.885632	-0.0311124	0.831939	-0.0145543	0.920936	-0.413396	0.00315335	-0.843842	2.67361e-14	-0.2883	0.0445498	0.877435	1.32784e-16	0.370388	0.00880122	0.502453	0.000234254	-0.331968	0.0197901
OAF	darkgreen	-0.259411	0.0718686	0.436688	0.0017067	-0.60633	3.88572e-06	0.381757	0.00679633	0.48028	0.000478551	-0.187572	0.196842	-0.164484	0.258738	0.128776	0.377862	0.206002	0.155587	-0.000911058	0.995043	0.097991	0.502957	-0.14624	0.316025	-0.342062	0.0161424	-0.752714	4.44428e-10	-0.336987	0.0178976	0.917561	1.87514e-20	0.482127	0.00045173	0.482913	0.000440732	-0.472457	0.000608789
FBXO31	darkgreen	-0.23709	0.10095	0.323901	0.0231856	-0.483806	0.000428544	0.217176	0.13389	0.381167	0.00688963	-0.0842111	0.565099	-0.0845733	0.563421	0.0936615	0.522098	0.22702	0.116723	0.111343	0.446266	0.171375	0.23904	-0.209794	0.147952	-0.38206	0.00674879	-0.731831	2.3134e-09	-0.174089	0.23157	0.891933	8.12996e-18	0.563584	2.48182e-05	0.535568	7.3268e-05	-0.317691	0.0261211
RTKN	darkgreen	-0.490339	0.00034817	0.21972	0.129281	-0.64953	4.43419e-07	0.282835	0.0489362	0.59441	6.69369e-06	-0.285406	0.0468312	-0.348708	0.0140666	0.229134	0.113266	0.449786	0.00118522	-0.130101	0.372935	-0.0545182	0.709854	0.0178771	0.902963	-0.175912	0.226643	-0.647762	4.87869e-07	-0.445993	0.00131917	0.811521	1.52225e-12	0.281931	0.0496946	0.274156	0.0566173	-0.524124	0.000110988
CREB3L1	darkgreen	-0.314115	0.0279486	0.484842	0.000414768	-0.777726	4.9074e-11	0.178407	0.220018	0.598893	5.4694e-06	-0.0116587	0.93663	-0.180069	0.215682	0.330639	0.0203189	0.313826	0.0281011	-0.0321262	0.826545	0.0822321	0.574309	-0.109007	0.455923	-0.524239	0.000110535	-0.80584	2.86002e-12	-0.316924	0.0265045	0.875649	1.82771e-16	0.402791	0.00411258	0.498644	0.000265761	-0.368305	0.00921927
DAZL	darkgreen	0.380995	0.00691697	-0.509505	0.000184716	0.743085	9.69743e-10	-0.219271	0.130087	-0.540824	6.02399e-05	0.128602	0.378512	0.253072	0.0793523	-0.277817	0.0532665	-0.364706	0.00998208	0.218309	0.131821	0.115216	0.430509	0.0178687	0.903009	0.309479	0.0304753	0.774165	6.83031e-11	0.381386	0.00685483	-0.788059	1.81472e-11	-0.227783	0.115467	-0.500835	0.0002472	0.326758	0.0219313
EPS8L2	darkgreen	-0.402976	0.00409386	0.00228128	0.987588	-0.553241	3.7433e-05	0.46817	0.000692971	0.336716	0.0179959	-0.21161	0.144395	-0.163091	0.262848	0.162852	0.263559	0.192345	0.185483	0.0522312	0.721524	-0.0425899	0.771384	-0.152814	0.294521	-0.182715	0.208899	-0.523582	0.000113151	-0.305755	0.0326397	0.704862	1.57468e-08	0.298766	0.0370454	0.483797	0.000428662	-0.343471	0.0156815
SRA1	darkgreen	-0.245857	0.088602	0.378767	0.00728069	-0.593802	6.87816e-06	0.263502	0.0673429	0.448544	0.00122769	-0.129604	0.374777	-0.0686802	0.639138	0.0836675	0.567622	0.331217	0.0200877	0.00691268	0.962402	0.0625092	0.669608	-0.128447	0.379094	-0.533654	7.86214e-05	-0.84244	3.24507e-14	-0.192426	0.185294	0.930315	4.16553e-22	0.584337	1.04239e-05	0.667538	1.61587e-07	-0.299309	0.0366867
LZTS2	darkgreen	-0.411759	0.00328717	0.253548	0.0787701	-0.639467	7.57641e-07	0.304185	0.0335896	0.517297	0.000141199	-0.159294	0.274274	-0.278302	0.0528348	0.187379	0.197312	0.300768	0.0357358	-0.0340841	0.816152	0.0253634	0.862661	-0.0643823	0.6603	-0.425479	0.00230566	-0.7646	1.61326e-10	-0.315986	0.0269795	0.911508	9.26081e-20	0.417704	0.00282395	0.485434	0.000407084	-0.384185	0.0064238
VPS28	darkgreen	-0.237211	0.100771	0.29835	0.0373222	-0.543266	5.49394e-05	0.241066	0.0951954	0.483407	0.000433948	-0.165729	0.2551	-0.232369	0.108127	0.09869	0.499901	0.322055	0.0240279	-0.0198201	0.892476	0.0718759	0.623583	-0.123212	0.398983	-0.495558	0.00029405	-0.716775	6.93451e-09	-0.326885	0.0218766	0.937626	3.34047e-23	0.494223	0.00030712	0.424468	0.00236788	-0.472527	0.0006075
MBD3	darkgreen	-0.341661	0.0162754	0.352861	0.0128888	-0.654264	3.42286e-07	0.313657	0.02819	0.569121	1.98038e-05	-0.201666	0.164667	-0.274057	0.0567101	0.157332	0.280306	0.370075	0.00886302	-0.0558352	0.703163	0.0430174	0.769152	-0.163144	0.262693	-0.513053	0.000163581	-0.791798	1.24884e-11	-0.343063	0.0158139	0.933552	1.41195e-22	0.491968	0.00033038	0.453936	0.00105271	-0.476767	0.000533567
CD2BP2	darkgreen	-0.138982	0.340897	0.347015	0.0145722	-0.496567	0.000284511	0.171658	0.238254	0.40723	0.00368367	0.0155672	0.915453	0.00976858	0.946887	0.0500719	0.7326	0.278887	0.0523186	0.0780091	0.594186	0.150519	0.301918	-0.125589	0.389875	-0.596444	6.10998e-06	-0.832121	1.27752e-13	-0.0959703	0.511846	0.897458	2.52161e-18	0.65501	3.28472e-07	0.674756	1.05723e-07	-0.232289	0.108252
D2HGDH	darkgreen	-0.429702	0.00206105	-0.179934	0.216032	-0.413997	0.00310551	0.425709	0.00229173	0.33867	0.0172985	-0.205364	0.1569	-0.190184	0.190567	0.152816	0.294514	0.196926	0.17503	0.0351939	0.810275	-0.0615372	0.674457	-0.227226	0.116384	-0.178683	0.219295	-0.504924	0.000215669	-0.177519	0.222361	0.636168	8.99318e-07	0.32224	0.0239422	0.3911	0.00545859	-0.206091	0.155405
SUPT5H	darkgreen	-0.340727	0.016589	0.243793	0.091398	-0.589475	8.33148e-06	0.294429	0.0400183	0.459152	0.000905054	-0.0829747	0.570845	-0.139701	0.338382	0.104548	0.474669	0.301329	0.0353759	-0.00155857	0.99152	-0.0306519	0.834391	-0.11863	0.416878	-0.483907	0.000427173	-0.84822	1.44185e-14	-0.221217	0.126627	0.945738	1.38333e-24	0.510062	0.000181242	0.602939	4.54609e-06	-0.28819	0.044635
SLC25A6	darkgreen	-0.188231	0.195246	0.272411	0.0582734	-0.452393	0.00110036	0.239691	0.097155	0.408719	0.00354896	-0.172189	0.236783	-0.176856	0.224121	-0.01686	0.90846	0.293903	0.0403916	0.0569084	0.697728	0.168014	0.248515	-0.107803	0.460946	-0.403322	0.00405909	-0.692997	3.42754e-08	-0.24006	0.0966264	0.905286	4.26248e-19	0.586318	9.56569e-06	0.4726	0.000606157	-0.407665	0.00364385
DES	darkgreen	-0.279369	0.0518956	0.512975	0.000164022	-0.732616	2.18035e-09	0.271949	0.058718	0.664885	1.88298e-07	-0.0816223	0.57716	-0.205753	0.156099	0.299257	0.0367207	0.422467	0.00249548	-0.192891	0.184214	-0.14432	0.322492	0.012698	0.930993	-0.486524	0.000393256	-0.795118	8.90579e-12	-0.369473	0.00898274	0.831838	1.32466e-13	0.324454	0.0229382	0.447635	0.00125963	-0.440079	0.0015551
PAQR4	darkgreen	-0.322985	0.0236003	0.449983	0.00117861	-0.70176	1.93677e-08	0.337987	0.0175395	0.533103	8.02266e-05	-0.119503	0.413434	-0.23653	0.101782	0.167781	0.249181	0.367598	0.0093649	0.0388579	0.790945	0.0184157	0.900054	-0.0367233	0.802192	-0.462513	0.000820017	-0.790616	1.40661e-11	-0.341049	0.0164806	0.930385	4.07152e-22	0.433554	0.00185833	0.501816	0.000239268	-0.415754	0.00296908
TTLL12	darkgreen	-0.314906	0.0275355	0.241852	0.0940887	-0.496531	0.000284852	0.368032	0.00927535	0.427066	0.00221091	-0.282051	0.0495934	-0.19751	0.173727	-0.00412596	0.977554	0.227346	0.116185	0.0175133	0.904929	0.0399092	0.785421	0.0469862	0.748521	-0.415904	0.00295768	-0.631066	1.16777e-06	-0.327721	0.0215212	0.869319	5.45898e-16	0.488916	0.000364408	0.491104	0.000339713	-0.490664	0.000344552
SSU72	darkgreen	-0.38739	0.00595937	0.329579	0.020749	-0.647451	4.9612e-07	0.299015	0.0368807	0.522443	0.000117824	-0.248513	0.0851037	-0.253641	0.0786565	0.0318448	0.828042	0.34146	0.0163424	-0.0948134	0.51697	-0.000494357	0.99731	0.0329447	0.822197	-0.408708	0.00354995	-0.763368	1.79678e-10	-0.343977	0.015519	0.924783	2.35785e-21	0.432895	0.00189173	0.49945	0.000258792	-0.407882	0.00362412
AEBP1	darkgreen	-0.140438	0.335816	0.340174	0.0167773	-0.409078	0.00351712	0.0597527	0.683394	0.369943	0.00888901	0.136559	0.349466	0.081289	0.578721	-0.045466	0.756404	0.204095	0.159534	0.280549	0.0508726	0.205851	0.155896	-0.324829	0.0227715	-0.348331	0.014178	-0.799772	5.48548e-12	-0.00453344	0.975337	0.820087	5.64463e-13	0.573087	1.68044e-05	0.482106	0.000452029	-0.12644	0.386646
CALML5	darkgreen	-0.286037	0.046326	0.0869302	0.55256	-0.388574	0.0057954	0.265782	0.0649212	0.355625	0.0121526	-0.305278	0.0329258	-0.408905	0.00353242	0.125012	0.392078	0.336648	0.0180204	-0.0555208	0.704758	0.0541384	0.711787	-0.195071	0.179211	-0.349692	0.0137794	-0.503741	0.000224393	-0.353956	0.0125927	0.792571	1.15492e-11	0.394372	0.00504778	0.24085	0.0955008	-0.520512	0.000126147
CYC1	darkgreen	-0.18272	0.208886	0.371772	0.00853263	-0.503427	0.00022676	0.195739	0.177697	0.443791	0.00140302	-0.202707	0.162454	-0.131685	0.367093	-0.0246045	0.866732	0.301816	0.0350657	0.0965621	0.509235	0.186512	0.199431	-0.12251	0.401697	-0.515549	0.000150054	-0.732724	2.16273e-09	-0.263112	0.0677644	0.946169	1.1523e-24	0.592935	7.14904e-06	0.527891	9.6966e-05	-0.433658	0.00185312
HOOK2	darkgreen	-0.378317	0.00735622	0.156332	0.283411	-0.646236	5.29555e-07	0.436056	0.00173635	0.488362	0.000370919	-0.366669	0.00955944	-0.360997	0.0108244	0.15132	0.299321	0.366578	0.00957869	-0.118071	0.419095	-0.0516353	0.724575	0.0213839	0.884048	-0.512831	0.000164836	-0.693705	3.27552e-08	-0.416515	0.00291167	0.904362	5.29936e-19	0.417801	0.00281694	0.535039	7.47123e-05	-0.472108	0.000615283
RCC2	darkgreen	-0.0417692	0.775674	0.274377	0.0564103	-0.282456	0.0492533	0.0398629	0.785664	0.335491	0.018445	-0.0317685	0.828447	0.0570564	0.696979	-0.012179	0.933808	0.175901	0.226672	0.325236	0.022592	0.392707	0.00525325	-0.282036	0.0496061	-0.605249	4.08583e-06	-0.73664	1.60416e-09	0.0318252	0.828146	0.826001	2.75864e-13	0.754606	3.79665e-10	0.659992	2.48706e-07	-0.127196	0.38379
EFNA3	darkgreen	-0.274596	0.0562064	0.511315	0.000173641	-0.723548	4.26972e-09	0.295661	0.0391541	0.638323	8.04249e-07	-0.130101	0.372935	-0.221877	0.125471	0.136508	0.349646	0.384845	0.00632569	-0.102916	0.481628	-0.0454048	0.756722	-0.00248424	0.986484	-0.281734	0.0498607	-0.783225	2.90947e-11	-0.382164	0.00673262	0.844992	2.27753e-14	0.332084	0.0197447	0.358236	0.0114906	-0.481025	0.00046757
EYA2	darkgreen	-0.416423	0.00291856	0.233252	0.106755	-0.70808	1.26681e-08	0.38565	0.00620768	0.613828	2.72832e-06	-0.316117	0.026913	-0.345681	0.0149818	0.22019	0.128444	0.455742	0.000999316	-0.192809	0.184404	-0.151598	0.298424	0.0768278	0.5998	-0.547222	4.7253e-05	-0.798853	6.04233e-12	-0.413719	0.00312754	0.862492	1.67025e-15	0.340716	0.016593	0.531078	8.63869e-05	-0.409749	0.00345823
DEPDC1B	darkgreen	0.367729	0.00933774	-0.536308	7.12909e-05	0.746342	7.47719e-10	-0.242015	0.0938595	-0.542308	5.69663e-05	0.196168	0.17673	0.305176	0.0329873	-0.244418	0.0905435	-0.407737	0.0036373	0.229292	0.113011	0.128369	0.379385	-0.0324772	0.82468	0.340961	0.0165099	0.72487	3.87767e-09	0.415854	0.00296151	-0.776812	5.34491e-11	-0.244125	0.0909438	-0.404534	0.00393922	0.401997	0.00419381
APOPT1	darkgreen	-0.291532	0.0421109	0.421953	0.00252926	-0.63425	9.92696e-07	0.255707	0.0761698	0.518911	0.000133451	-0.211302	0.144994	-0.220473	0.127941	0.0669677	0.647537	0.35375	0.0126479	0.0597074	0.683622	0.0940155	0.520519	-0.0998544	0.494831	-0.380283	0.00703139	-0.755198	3.61314e-10	-0.361591	0.0106856	0.939451	1.69634e-23	0.459634	0.000892405	0.472328	0.000611194	-0.451077	0.00114251
MST1	darkgreen	-0.439804	0.00156692	0.0440169	0.763941	-0.594194	6.75863e-06	0.507679	0.000196529	0.491875	0.000331372	-0.335625	0.0183956	-0.307273	0.0317425	0.126767	0.385412	0.314157	0.0279267	-0.139381	0.339499	-0.173527	0.233103	0.066415	0.650257	-0.297886	0.0376331	-0.65724	2.90198e-07	-0.37335	0.00823502	0.843533	2.79054e-14	0.316666	0.0266344	0.503208	0.000228424	-0.383674	0.00650061
FAM226A	darkgreen	0.510136	0.000180783	-0.466502	0.000728451	0.8298	1.7168e-13	-0.480052	0.000481967	-0.573935	1.62205e-05	0.463656	0.000792778	0.471759	0.000621837	-0.274531	0.0562671	-0.479818	0.000485486	0.306175	0.032389	0.322734	0.023715	-0.124135	0.395432	0.294909	0.0396797	0.632554	1.08267e-06	0.637315	8.47501e-07	-0.76095	2.21579e-10	-0.0429945	0.769272	-0.315236	0.0273644	0.5548	3.52163e-05
GALNT6	darkgreen	-0.369311	0.00901518	0.223174	0.123218	-0.654321	3.412e-07	0.351796	0.0131824	0.509378	0.000185513	-0.105381	0.471135	-0.24653	0.0877048	0.241203	0.0950019	0.412331	0.00323989	-0.00505254	0.972514	-0.0339221	0.817011	0.0311923	0.831513	-0.562774	2.56431e-05	-0.828067	2.13442e-13	-0.257921	0.0735748	0.859661	2.60953e-15	0.42063	0.00261791	0.669321	1.45662e-07	-0.202044	0.16386
PRR14	darkgreen	-0.248939	0.0845526	0.22787	0.115324	-0.437867	0.00165253	0.164201	0.259571	0.373669	0.00817588	-0.00214346	0.988338	0.0578942	0.692748	-0.00555344	0.969791	0.20394	0.159859	0.0872038	0.551306	0.14199	0.330447	-0.214765	0.138367	-0.406544	0.00374734	-0.785454	2.34398e-11	-0.0621813	0.671242	0.884195	3.78122e-17	0.632867	1.06551e-06	0.664448	1.93074e-07	-0.189519	0.192152
AHSA1	darkgreen	0.0904722	0.536426	0.336487	0.018079	-0.200333	0.167535	0.0234525	0.872919	0.256576	0.0751433	-0.00656319	0.964301	0.0967437	0.508434	-0.241534	0.0945353	0.183877	0.205969	0.307612	0.031545	0.418676	0.002754	-0.160831	0.26961	-0.525041	0.000107413	-0.726182	3.52201e-09	0.0884872	0.545439	0.795907	8.21021e-12	0.801266	4.68231e-12	0.675767	9.9531e-08	-0.0612488	0.675899
FASTK	darkgreen	-0.32228	0.023924	0.125028	0.392014	-0.47959	0.000488936	0.297993	0.0375617	0.341343	0.0163815	-0.113011	0.439442	-0.0876546	0.549242	0.105371	0.471177	0.157054	0.281165	0.0690114	0.637518	0.120861	0.408109	-0.277858	0.05323	-0.254352	0.0777936	-0.60237	4.66652e-06	-0.22637	0.117803	0.777126	5.19086e-11	0.479988	0.000482916	0.474191	0.000577455	-0.374601	0.00800556
SLPI	darkgreen	-0.0695782	0.634751	0.281351	0.0501863	-0.381265	0.00687404	0.248692	0.0848723	0.231165	0.110019	-0.103819	0.477769	0.0688467	0.638323	-0.122986	0.399854	0.136418	0.349967	0.225885	0.118613	0.257749	0.0737737	-0.126411	0.386756	-0.418882	0.00273933	-0.670654	1.34738e-07	-0.0963618	0.510118	0.760248	2.35377e-10	0.62933	1.27494e-06	0.766003	1.42572e-10	-0.19186	0.186617
NAGK	darkgreen	-0.223682	0.122346	0.230666	0.110809	-0.415313	0.00300282	0.226802	0.117084	0.38367	0.00650123	-0.224608	0.120767	-0.1571	0.281024	-0.0323343	0.825439	0.261175	0.0698886	0.049611	0.734971	0.15386	0.291189	-0.132011	0.365895	-0.467355	0.000710112	-0.698427	2.4122e-08	-0.236375	0.102013	0.910694	1.13795e-19	0.578302	1.3497e-05	0.545145	5.11573e-05	-0.371149	0.00865268
FLII	darkgreen	-0.204936	0.157785	0.236489	0.101842	-0.415578	0.00298256	0.229942	0.111966	0.476541	0.000537284	-0.260692	0.070426	-0.264657	0.0661076	-0.0174439	0.905304	0.320487	0.0247633	0.0462167	0.752508	0.126112	0.387891	-0.0907469	0.535185	-0.371562	0.00857292	-0.610835	3.14529e-06	-0.317601	0.0261658	0.864649	1.18076e-15	0.480282	0.000478528	0.301576	0.0352185	-0.494087	0.000308476
PMPCA	darkgreen	-0.355918	0.0120766	0.294427	0.0400196	-0.611694	3.02003e-06	0.378902	0.00725817	0.488098	0.000374058	-0.199499	0.169347	-0.2554	0.0765359	0.116677	0.424646	0.323066	0.0235634	0.122904	0.400171	0.0697078	0.634119	-0.0938824	0.521113	-0.394574	0.00502336	-0.742536	1.01283e-09	-0.357884	0.0115779	0.935392	7.45068e-23	0.46472	0.000768167	0.480749	0.000471605	-0.471253	0.000631461
TPRG1L	darkgreen	-0.163282	0.262283	0.443727	0.00140552	-0.610526	3.19164e-06	0.180189	0.215372	0.453767	0.00105784	-0.124103	0.395557	-0.0501227	0.732338	0.0214539	0.883671	0.319327	0.0253192	0.131945	0.366139	0.175558	0.227595	-0.12227	0.402625	-0.662011	2.21864e-07	-0.855729	4.77395e-15	-0.196432	0.176137	0.949696	2.43755e-25	0.610526	3.19167e-06	0.698468	2.40566e-08	-0.281195	0.0503191
ELOF1	darkgreen	-0.198102	0.172415	0.399145	0.00449703	-0.569382	1.95916e-05	0.244995	0.0897613	0.5445	5.24268e-05	-0.134913	0.355357	-0.226108	0.11824	0.125657	0.389618	0.378296	0.00735967	0.0104231	0.943334	0.158159	0.277753	-0.124251	0.394986	-0.50242	0.000234511	-0.777918	4.81983e-11	-0.317335	0.0262986	0.932868	1.78279e-22	0.55541	3.43818e-05	0.467298	0.000711319	-0.494894	0.00030049
CST2	darkgreen	-0.251147	0.0817424	0.0446888	0.760444	-0.360237	0.0110043	0.443631	0.00140925	0.418643	0.00275633	-0.191415	0.187658	-0.209542	0.14845	0.180987	0.213313	0.288147	0.044668	0.00492145	0.973227	0.0217865	0.88188	-0.082931	0.571048	-0.455016	0.00102049	-0.582916	1.10832e-05	-0.29943	0.0366068	0.79316	1.08796e-11	0.436839	0.00169967	0.414886	0.00303576	-0.400347	0.00436698
AAR2	darkgreen	-0.281485	0.0500724	0.35586	0.0120916	-0.531122	8.62493e-05	0.168618	0.246794	0.431537	0.00196217	-0.0598636	0.682837	-0.125031	0.392003	0.16076	0.269826	0.287988	0.0447913	0.0643562	0.66043	0.144257	0.322704	-0.146857	0.313966	-0.382741	0.00664309	-0.784287	2.62575e-11	-0.203805	0.160141	0.902044	9.06238e-19	0.51848	0.00013548	0.572454	1.72534e-05	-0.300416	0.0359631
TRPV6	darkgreen	-0.404583	0.00393443	0.360708	0.0108926	-0.68299	6.42206e-08	0.429896	0.0020504	0.471207	0.000632344	-0.269714	0.0609086	-0.246136	0.0882294	0.157011	0.2813	0.30953	0.0304462	-0.151854	0.2976	-0.100868	0.490441	-0.0118579	0.935549	-0.456677	0.000972636	-0.760852	2.23461e-10	-0.416472	0.00291493	0.931815	2.53993e-22	0.37511	0.00791365	0.573996	1.61789e-05	-0.466139	0.000736385
EPHB4	darkgreen	-0.40225	0.00416775	0.468041	0.000695669	-0.688654	4.51498e-08	0.27819	0.0529345	0.574125	1.60923e-05	-0.213711	0.14036	-0.255743	0.0761276	0.0576127	0.694168	0.344726	0.015281	-0.179861	0.216221	-0.0597377	0.68347	0.0820813	0.575013	-0.298504	0.0372195	-0.775801	5.87247e-11	-0.357488	0.0116769	0.915434	3.33131e-20	0.383114	0.0065859	0.474308	0.000575393	-0.424689	0.00235418
NDRG2	darkgreen	-0.284448	0.0476064	-0.0172141	0.906546	-0.338059	0.017514	0.512338	0.000167654	0.2487	0.0848614	-0.361164	0.0107853	-0.214734	0.138425	0.0403625	0.783043	0.198792	0.170896	0.121563	0.405372	0.0381058	0.794903	-0.083253	0.569549	-0.315548	0.0272039	-0.42559	0.00229892	-0.308861	0.0308257	0.676896	9.30183e-08	0.372186	0.00845354	0.514515	0.000155529	-0.370134	0.00885137
CACNG4	darkgreen	-0.352148	0.0130848	0.369333	0.00901073	-0.662434	2.16607e-07	0.403126	0.00407882	0.432626	0.00190551	-0.20448	0.158732	-0.16455	0.258544	0.0923934	0.527772	0.239971	0.0967543	-0.0662538	0.651052	-0.000973972	0.994701	0.0323159	0.825537	-0.368245	0.00923164	-0.774239	6.78437e-11	-0.328869	0.0210413	0.895617	3.75159e-18	0.464932	0.000763338	0.657679	2.83176e-07	-0.398182	0.00460368
COASY	darkgreen	-0.347728	0.0143575	0.258613	0.0727779	-0.59926	5.379e-06	0.42739	0.00219198	0.424997	0.00233513	-0.282918	0.0488668	-0.243265	0.0921239	0.109798	0.45264	0.300937	0.0356269	0.0388029	0.791234	0.0702872	0.631296	-0.0901924	0.537692	-0.427012	0.00221404	-0.689269	4.34337e-08	-0.365876	0.00972824	0.919753	1.02007e-20	0.497556	0.000275438	0.578587	1.33349e-05	-0.471	0.000636306
MIR6890	darkgreen	-0.153328	0.29288	0.302218	0.0348118	-0.466313	0.000732586	0.227334	0.116205	0.317408	0.0262624	-0.0663382	0.650636	0.107214	0.463412	-0.0550265	0.707269	0.177061	0.223576	0.186244	0.200088	0.195061	0.179234	-0.140976	0.333946	-0.474269	0.000576074	-0.796179	7.98284e-12	-0.0334593	0.819466	0.808308	2.18023e-12	0.644115	5.93011e-07	0.816347	8.75986e-13	-0.0992153	0.49761
CCDC12	darkgreen	-0.110458	0.449912	0.258319	0.0731155	-0.384075	0.00644024	0.161814	0.266657	0.361686	0.0106634	-0.162159	0.265623	-0.0496602	0.734718	-0.0882233	0.546643	0.23068	0.110787	0.0732677	0.616859	0.194522	0.18046	-0.188582	0.194399	-0.561918	2.65412e-05	-0.737967	1.44796e-09	-0.106054	0.468291	0.883282	4.50097e-17	0.667051	1.6621e-07	0.570708	1.85487e-05	-0.262081	0.0688883
TIMP1	darkgreen	0.00869911	0.952695	0.248955	0.0845327	-0.254537	0.07757	0.272121	0.058552	0.332116	0.0197322	-0.104097	0.476585	0.0600682	0.681811	-0.112265	0.442486	0.195764	0.177639	0.316387	0.0267755	0.312858	0.0286159	-0.197684	0.173342	-0.608239	3.55422e-06	-0.68725	4.93084e-08	-0.0485996	0.740183	0.845429	2.14193e-14	0.759814	2.44302e-10	0.601236	4.91542e-06	-0.255578	0.0763231
ANKLE2	darkgreen	-0.202129	0.163679	0.129254	0.376079	-0.326492	0.0220453	0.176633	0.224716	0.449904	0.00118127	-0.0404703	0.782477	-0.186499	0.199464	0.0317801	0.828386	0.262579	0.0683439	0.0829642	0.570894	0.11062	0.449245	-0.173234	0.233905	-0.28197	0.049662	-0.686542	5.15355e-08	-0.112309	0.442306	0.764726	1.59542e-10	0.469726	0.000661281	0.321602	0.0242383	-0.19535	0.178578
ARL6IP4	darkgreen	-0.150851	0.300842	0.197598	0.173532	-0.385162	0.00627897	0.353681	0.0126665	0.34084	0.0165509	-0.235381	0.103504	-0.124752	0.39307	0.0121631	0.933894	0.244932	0.0898472	0.14651	0.315123	0.201571	0.16487	-0.242472	0.0932224	-0.597713	5.76992e-06	-0.647094	5.0573e-07	-0.229299	0.112999	0.874638	2.18538e-16	0.635596	9.26283e-07	0.578186	1.35636e-05	-0.407126	0.00369334
FADS3	darkgreen	-0.308454	0.0310585	0.538145	6.65881e-05	-0.670798	1.33607e-07	0.264429	0.0663497	0.505813	0.000209312	-0.148247	0.309356	-0.296024	0.0389027	0.153558	0.292148	0.338128	0.0174897	-0.277434	0.0536099	-0.108611	0.45757	0.0661444	0.651591	-0.266724	0.0639412	-0.759828	2.44022e-10	-0.364413	0.0100464	0.840774	4.07504e-14	0.287891	0.0448667	0.381774	0.00679365	-0.398781	0.00453717
POLD2	darkgreen	-0.0358911	0.806588	0.492583	0.000323887	-0.571521	1.79347e-05	0.22776	0.115504	0.50303	0.000229784	-0.203477	0.16083	-0.172783	0.235143	-0.0689395	0.63787	0.34064	0.0166185	0.16006	0.271942	0.28416	0.0478418	-0.0823193	0.573901	-0.610081	3.25935e-06	-0.721336	5.01011e-09	-0.276526	0.0544294	0.886772	2.29472e-17	0.59654	6.08351e-06	0.446327	0.00130686	-0.443761	0.00140418
R3HCC1	darkgreen	-0.381815	0.00678714	0.208203	0.151121	-0.575	1.55133e-05	0.383031	0.00659861	0.556308	3.31854e-05	-0.295122	0.0395304	-0.42909	0.00209505	0.25069	0.0823186	0.399725	0.00443385	-0.0932697	0.523848	-0.0361377	0.805284	-0.129539	0.375018	-0.388116	0.0058583	-0.624327	1.63712e-06	-0.470961	0.000637069	0.885668	2.84643e-17	0.341039	0.0164839	0.235537	0.103269	-0.621241	1.90598e-06
MRPL14	darkgreen	-0.0960388	0.511543	0.457896	0.000938798	-0.458139	0.000932199	0.0735196	0.615645	0.366695	0.00955403	0.0242186	0.868804	0.113135	0.438935	-0.135264	0.354096	0.248617	0.0849694	0.189343	0.192571	0.22848	0.114327	-0.112275	0.442446	-0.492246	0.000327434	-0.866008	9.46243e-16	-0.0239034	0.870497	0.90628	3.36364e-19	0.697906	2.49581e-08	0.73489	1.8345e-09	-0.153019	0.293867
H1FX	darkgreen	-0.210888	0.145803	-0.0445412	0.761212	-0.185983	0.200731	0.453384	0.00106955	0.270097	0.0605291	-0.303147	0.03423	-0.354168	0.0125361	0.188077	0.195619	0.160233	0.271418	0.0213624	0.884164	0.0180974	0.901773	-0.179879	0.216175	-0.379059	0.00723206	-0.328869	0.0210413	-0.357034	0.0117915	0.671266	1.29981e-07	0.365547	0.00979907	0.157575	0.279552	-0.568312	2.0473e-05
INO80B	darkgreen	-0.526531	0.000101832	0.223934	0.121915	-0.660233	2.45351e-07	0.341703	0.0162614	0.520374	0.000126761	-0.300222	0.0360891	-0.378553	0.00731657	0.244987	0.0897727	0.369368	0.0090038	-0.271615	0.0590417	-0.165699	0.25519	-0.0755689	0.605809	-0.170476	0.241549	-0.640748	7.08472e-07	-0.467233	0.000712704	0.869675	5.14117e-16	0.268586	0.0620394	0.244112	0.0909612	-0.584612	1.03008e-05
TCF25	darkgreen	-0.120345	0.410129	0.218781	0.130968	-0.411002	0.00335072	0.238388	0.0990419	0.304754	0.0332425	-0.0229872	0.875421	0.0430318	0.769077	-0.0226091	0.877454	0.142753	0.327827	0.221641	0.125882	0.230828	0.110553	-0.3201	0.0249475	-0.411014	0.00334971	-0.694083	3.19697e-08	-0.0839803	0.56617	0.774279	6.75926e-11	0.61131	3.07542e-06	0.614915	2.59002e-06	-0.228261	0.114685
DECR2	darkgreen	-0.237922	0.0997245	0.438174	0.00163869	-0.664808	1.89137e-07	0.181649	0.211612	0.544317	5.27941e-05	0.0202753	0.890021	-0.111594	0.445237	0.168136	0.248166	0.378959	0.00724871	-0.0460983	0.753122	-0.0032103	0.982534	-0.0262922	0.857682	-0.538482	6.57565e-05	-0.87404	2.42722e-16	-0.237771	0.0999452	0.942981	4.29909e-24	0.471821	0.000620676	0.566617	2.19428e-05	-0.311736	0.0292226
C19orf53	darkgreen	-0.149401	0.305565	0.424618	0.00235857	-0.540478	6.10276e-05	0.165154	0.256778	0.520272	0.000127217	-0.0516457	0.724522	-0.0843447	0.564481	0.0122587	0.933376	0.329741	0.0206826	0.055335	0.705701	0.13781	0.345025	-0.122954	0.39998	-0.59599	6.23588e-06	-0.845947	1.99141e-14	-0.196354	0.176311	0.94137	8.12856e-24	0.595214	6.45711e-06	0.520341	0.00012691	-0.363415	0.0102685
HYI	darkgreen	-0.340234	0.0167569	0.219818	0.129106	-0.518196	0.000136837	0.38867	0.00578219	0.506737	0.000202892	-0.419961	0.00266381	-0.380494	0.00699743	0.150921	0.300613	0.382119	0.00673963	0.0643041	0.660688	0.106581	0.466069	-0.183726	0.206347	-0.432641	0.00190474	-0.635971	9.08515e-07	-0.406473	0.0037539	0.898385	2.05864e-18	0.467396	0.000709239	0.341529	0.0163193	-0.572644	1.71179e-05
SPRYD3	darkgreen	-0.35603	0.0120478	0.400195	0.0043833	-0.685036	5.65967e-08	0.359223	0.0112486	0.425161	0.00232509	-0.205004	0.157645	-0.150718	0.30127	0.176857	0.224117	0.298995	0.0368938	-0.0763567	0.602046	-0.0740677	0.613008	-0.027164	0.853015	-0.486882	0.000388818	-0.806748	2.58936e-12	-0.30278	0.0344585	0.903839	5.98828e-19	0.441847	0.00148092	0.649672	4.40024e-07	-0.355732	0.0121248
NFE2L1	darkgreen	-0.126838	0.385142	0.381889	0.0067755	-0.583627	1.07488e-05	0.206842	0.153871	0.431484	0.00196498	-0.023719	0.871487	-0.124181	0.395258	0.0613994	0.675146	0.291315	0.042271	0.107185	0.463532	0.099536	0.496215	0.00704738	0.961669	-0.63236	1.0934e-06	-0.819442	6.0938e-13	-0.148453	0.308677	0.874521	2.23087e-16	0.563276	2.51292e-05	0.619119	2.11405e-06	-0.217263	0.133729
AP2M1	darkgreen	-0.16165	0.267146	0.188711	0.194089	-0.340969	0.0165074	0.270543	0.060089	0.327763	0.0215036	-0.170917	0.240315	-0.20467	0.158336	0.0207687	0.887362	0.218936	0.130688	0.105359	0.471226	0.0969633	0.507468	-0.211262	0.145073	-0.402899	0.00410169	-0.536129	7.17642e-05	-0.275151	0.0556907	0.81228	1.39704e-12	0.491505	0.000335352	0.307419	0.0316574	-0.457914	0.000938321
RAB26	darkgreen	-0.533627	7.86998e-05	0.207834	0.151862	-0.76508	1.54665e-10	0.403082	0.00408322	0.575533	1.51698e-05	-0.320655	0.0246833	-0.399999	0.00440435	0.1625	0.264606	0.431391	0.00196987	-0.166693	0.252308	-0.179552	0.217024	0.107078	0.463983	-0.342809	0.0158966	-0.75084	5.18748e-10	-0.489089	0.000362401	0.915704	3.09981e-20	0.280146	0.05122	0.431188	0.00198063	-0.491897	0.000331143
MIF	darkgreen	-0.199156	0.170097	0.474007	0.000580712	-0.598936	5.45885e-06	0.178007	0.221073	0.492592	0.000323791	-0.152876	0.294321	-0.087514	0.549885	-0.0721848	0.622088	0.391493	0.00540776	0.0523609	0.72086	0.137627	0.345671	-0.0890305	0.542965	-0.433792	0.00184641	-0.781322	3.49249e-11	-0.274967	0.0558613	0.939817	1.47728e-23	0.53706	6.93298e-05	0.511226	0.000174169	-0.411698	0.00329224
ARFIP2	darkgreen	-0.3452	0.0151319	0.285444	0.0468005	-0.577917	1.37194e-05	0.347285	0.0144907	0.502006	0.000237765	-0.244909	0.089878	-0.231253	0.109879	0.0938191	0.521395	0.317945	0.0259956	0.0475698	0.745502	0.102433	0.4837	-0.12685	0.385096	-0.403445	0.00404682	-0.738927	1.34403e-09	-0.353232	0.0127877	0.956962	6.75396e-27	0.520147	0.00012778	0.49027	0.000348938	-0.493525	0.000314157
NDUFS3	darkgreen	-0.115331	0.430044	0.282113	0.0495411	-0.41437	0.00307611	0.241765	0.0942105	0.390626	0.00552046	-0.150984	0.300411	-0.00240344	0.986923	-0.131888	0.366348	0.284399	0.0476464	0.207418	0.152703	0.228154	0.114859	-0.195273	0.178752	-0.47631	0.000541119	-0.773438	7.30212e-11	-0.125094	0.391763	0.891669	8.58349e-18	0.69018	4.1006e-08	0.642474	6.46883e-07	-0.274728	0.0560834
GPS2	darkgreen	-0.123524	0.397779	0.333857	0.0190589	-0.431276	0.001976	0.159215	0.274514	0.516743	0.000143954	0.00529969	0.97117	-0.128307	0.379617	0.0475837	0.74543	0.28827	0.044573	0.0262999	0.857641	0.183134	0.207841	-0.150266	0.302741	-0.408383	0.00357893	-0.761849	2.05032e-10	-0.21096	0.14566	0.907218	2.68387e-19	0.57004	1.90679e-05	0.368891	0.00909984	-0.429823	0.00205444
SLC39A7	darkgreen	-0.299467	0.0365828	0.407349	0.00367282	-0.69136	3.80483e-08	0.250871	0.0820901	0.600815	5.01107e-06	-0.155944	0.284623	-0.304501	0.0333966	0.174776	0.229706	0.467702	0.000702769	-0.181759	0.211333	-0.123012	0.399756	0.0930874	0.524663	-0.545732	5.00254e-05	-0.846286	1.89858e-14	-0.362248	0.0105336	0.875514	1.87215e-16	0.339237	0.0171004	0.47385	0.000583499	-0.386566	0.00607593
STX10	darkgreen	-0.347711	0.0143624	0.285352	0.0468744	-0.591886	7.48984e-06	0.349074	0.0139591	0.573509	1.65114e-05	-0.221147	0.12675	-0.348772	0.0140477	0.160486	0.270652	0.367577	0.00936937	-0.178286	0.220338	-0.100001	0.494194	-0.0285331	0.845694	-0.34187	0.0162059	-0.693178	3.38804e-08	-0.416726	0.00289597	0.887781	1.88084e-17	0.355044	0.0123042	0.301116	0.0355121	-0.53742	6.84084e-05
MRC2	darkgreen	-0.216418	0.135285	0.361732	0.0106527	-0.566408	2.21304e-05	0.229236	0.113101	0.530995	8.66488e-05	0.0571221	0.696647	0.00541438	0.970547	0.0167163	0.909237	0.261849	0.0691431	0.108658	0.457377	0.0897682	0.539614	-0.124552	0.393835	-0.538886	6.47739e-05	-0.863839	1.34583e-15	-0.117345	0.421979	0.902536	8.0969e-19	0.577949	1.37009e-05	0.601637	4.82603e-06	-0.221218	0.126626
TNFSF12-TNFSF13	darkgreen	-0.150534	0.30187	0.378343	0.00735176	-0.483794	0.000428695	0.239145	0.0979421	0.48833	0.000371295	-0.154686	0.288576	-0.267608	0.063033	0.00211513	0.988492	0.366055	0.00968998	-0.0603542	0.680377	0.0139036	0.92446	-0.0121321	0.934062	-0.406926	0.00371179	-0.72028	5.40503e-09	-0.306718	0.0320677	0.881994	5.73995e-17	0.472661	0.00060503	0.363909	0.0101582	-0.455666	0.0010015
RAP1GAP	darkgreen	-0.421173	0.00258121	0.170565	0.241299	-0.582672	1.12e-05	0.501375	0.000242806	0.488692	0.00036703	-0.379083	0.00722808	-0.395772	0.00488038	0.236753	0.101449	0.299998	0.0362352	-0.194694	0.180068	-0.0971992	0.506431	-0.0613559	0.675363	-0.389693	0.00564403	-0.591346	7.67141e-06	-0.502877	0.000230962	0.881151	6.71932e-17	0.331609	0.019932	0.349994	0.0136923	-0.639743	7.46796e-07
G6PC3	darkgreen	-0.315529	0.0272135	0.478348	0.000508132	-0.677612	8.90935e-08	0.169947	0.243035	0.540437	6.11217e-05	-0.098599	0.500298	-0.0409044	0.780202	0.0908417	0.534756	0.348254	0.0142005	-0.0269004	0.854426	0.0717481	0.624202	-0.0439029	0.764535	-0.514736	0.000154347	-0.896472	3.12279e-18	-0.204047	0.159634	0.92476	2.37396e-21	0.518466	0.000135547	0.648603	4.66228e-07	-0.280765	0.0506868
AAMP	darkgreen	-0.25341	0.0789383	0.254653	0.0774306	-0.475628	0.000552577	0.305144	0.0330065	0.365606	0.00978625	-0.123303	0.398631	-0.0872173	0.551243	-0.0151962	0.91746	0.248061	0.0856921	0.140969	0.333972	0.0612852	0.675717	-0.0700702	0.632353	-0.47321	0.000595004	-0.76017	2.36962e-10	-0.210212	0.147127	0.91187	8.44295e-20	0.554366	3.5821e-05	0.594572	6.64529e-06	-0.326121	0.0222056
DCTPP1	darkgreen	-0.135384	0.353664	0.403782	0.00401326	-0.558848	3.00083e-05	0.248273	0.0854153	0.41391	0.00311236	-0.0603986	0.680154	-0.0174009	0.905536	0.0506071	0.729849	0.272398	0.0582854	0.200723	0.166692	0.210731	0.146109	-0.0822428	0.574258	-0.597207	5.90334e-06	-0.787057	2.00324e-11	-0.176822	0.224212	0.900395	1.31694e-18	0.605822	3.97857e-06	0.713114	8.96155e-09	-0.288603	0.0443165
SCAMP2	darkgreen	-0.334359	0.0188686	0.283423	0.0484479	-0.578106	1.36099e-05	0.444375	0.00138034	0.47468	0.000568882	-0.245587	0.0889641	-0.341945	0.0161809	0.223797	0.122148	0.299517	0.0365496	0.00870215	0.952678	0.0670673	0.647048	-0.0661092	0.651765	-0.350874	0.0134412	-0.552833	3.80341e-05	-0.465942	0.000740723	0.873755	2.55123e-16	0.396834	0.0047567	0.365152	0.00988457	-0.619438	2.08153e-06
DUOXA2	darkgreen	-0.299616	0.0364845	0.533252	7.979e-05	-0.72956	2.74279e-09	0.106875	0.464833	0.654288	3.41823e-07	-0.0601363	0.681469	-0.184213	0.205126	0.24951	0.0838197	0.460885	0.000860272	-0.19944	0.169478	-0.0514378	0.725587	-0.0159691	0.913278	-0.372063	0.0084771	-0.729678	2.7187e-09	-0.382105	0.0067417	0.763951	1.70757e-10	0.246653	0.0875419	0.292162	0.0416484	-0.458066	0.000934157
TMEM205	darkgreen	-0.274513	0.0562836	0.29718	0.0381105	-0.524648	0.000108934	0.279823	0.0514997	0.44695	0.00128415	-0.297966	0.0375795	-0.193254	0.183374	-0.00845301	0.954032	0.391783	0.00537052	0.0131595	0.928492	0.0714743	0.625529	-0.125994	0.388339	-0.461576	0.000842972	-0.747517	6.80112e-10	-0.287698	0.0450171	0.940073	1.3402e-23	0.542614	5.63102e-05	0.498396	0.000267942	-0.437127	0.00168633
SMIM5	darkgreen	-0.409729	0.00346001	0.395911	0.00486412	-0.786867	2.04101e-11	0.416619	0.00290392	0.609302	3.38115e-06	-0.224217	0.121432	-0.289359	0.0437386	0.106862	0.464888	0.393673	0.00513319	-0.20404	0.159648	-0.208411	0.150704	0.171513	0.238655	-0.379031	0.00723681	-0.785532	2.32617e-11	-0.430708	0.00200632	0.901024	1.14292e-18	0.340808	0.0165617	0.491816	0.000332003	-0.476282	0.00054159
COMT	darkgreen	-0.104262	0.475882	0.347433	0.014446	-0.48508	0.000411666	0.265319	0.065407	0.409513	0.00347882	-0.144539	0.321748	-0.220206	0.128415	-0.0911937	0.533168	0.311785	0.0291954	0.0460249	0.753503	0.135919	0.351748	-0.0274982	0.851226	-0.541691	5.83056e-05	-0.670384	1.3689e-07	-0.302326	0.0347437	0.873936	2.47178e-16	0.547394	4.69435e-05	0.433651	0.00185346	-0.478575	0.000504572
NPDC1	darkgreen	-0.306145	0.0324071	0.206887	0.15378	-0.503147	0.000228893	0.362124	0.0105622	0.396622	0.00478123	-0.201002	0.166091	-0.241273	0.0949028	0.115557	0.429137	0.234438	0.104935	-0.0448593	0.759557	0.0205713	0.888426	-0.166835	0.2519	-0.369648	0.00894773	-0.655909	3.12502e-07	-0.340426	0.0166912	0.892209	7.68006e-18	0.459168	0.000904622	0.464955	0.000762809	-0.464617	0.000770511
FOLR1	darkgreen	-0.288709	0.0442352	0.152286	0.296211	-0.464832	0.000765607	0.408115	0.00360305	0.392148	0.00532385	-0.349019	0.0139751	-0.307889	0.0313844	0.0655252	0.654646	0.270082	0.0605439	0.00876967	0.952312	0.0609786	0.67725	-0.00860917	0.953184	-0.345996	0.0148841	-0.580907	1.20808e-05	-0.389165	0.00571495	0.869926	4.92804e-16	0.456806	0.000969012	0.455085	0.00101845	-0.501325	0.00024321
CXorf40A	darkgreen	-0.298892	0.0369617	0.41115	0.00333822	-0.632749	1.07191e-06	0.218584	0.131324	0.422121	0.00251819	-0.0763256	0.602194	-0.067888	0.643018	0.0244604	0.867506	0.254465	0.0776571	0.0858662	0.557451	0.0725891	0.620134	-0.0960514	0.511487	-0.401049	0.00429255	-0.778575	4.53114e-11	-0.247	0.0870838	0.917812	1.75056e-20	0.494039	0.000308961	0.615494	2.51905e-06	-0.323107	0.0235448
UNC119	darkgreen	-0.314767	0.0276079	0.35174	0.013198	-0.659382	2.57396e-07	0.294161	0.0402082	0.560933	2.76116e-05	-0.184532	0.204331	-0.224423	0.12108	0.160488	0.270648	0.377787	0.00744593	-0.108292	0.458902	-0.0172736	0.906224	-0.0772926	0.597588	-0.415853	0.00296155	-0.759035	2.61137e-10	-0.376125	0.00773334	0.940922	9.67363e-24	0.434454	0.00181361	0.430672	0.00200828	-0.491907	0.000331036
TSTA3	darkgreen	-0.322915	0.0236322	0.270283	0.0603447	-0.621545	1.87779e-06	0.30186	0.0350381	0.516019	0.000147629	-0.242084	0.0937636	-0.348428	0.0141491	0.188505	0.194584	0.353623	0.012682	-0.152835	0.294454	-0.00239773	0.986955	-0.0765333	0.601204	-0.499943	0.000254608	-0.69515	2.98461e-08	-0.401215	0.0042751	0.916544	2.47281e-20	0.418416	0.00277253	0.39729	0.00470455	-0.503553	0.000225807
MUC1	darkgreen	-0.545877	4.97491e-05	-0.0299497	0.838133	-0.642586	6.43096e-07	0.550742	4.12576e-05	0.41168	0.00329376	-0.322739	0.0237126	-0.400177	0.00438522	0.256537	0.0751884	0.246965	0.087129	-0.137659	0.345561	-0.147402	0.312154	-0.00989157	0.946219	-0.2274	0.116097	-0.567002	2.16002e-05	-0.459142	0.000905305	0.794204	9.78038e-12	0.231277	0.10984	0.456464	0.000978659	-0.444483	0.00137616
NELFB	darkgreen	-0.403851	0.00400639	0.178787	0.219023	-0.539039	6.44046e-05	0.309882	0.0302479	0.394157	0.00507393	-0.196386	0.176238	-0.144225	0.322813	0.10578	0.469447	0.272861	0.0578427	-0.0334706	0.819406	-0.0136541	0.925812	-0.155384	0.286379	-0.366706	0.00955171	-0.729855	2.68302e-09	-0.249666	0.0836197	0.888743	1.55323e-17	0.467161	0.000714252	0.563157	2.52498e-05	-0.361553	0.0106943
FAM96B	darkgreen	0.0144252	0.921635	0.447628	0.00125986	-0.441959	0.0014763	0.0919301	0.529853	0.430447	0.00202038	-0.0523132	0.721104	-0.040019	0.784845	-0.100051	0.493979	0.284577	0.0475012	0.0950062	0.516115	0.20934	0.148851	-0.110019	0.451725	-0.448749	0.00122058	-0.7108	1.05164e-08	-0.209377	0.148777	0.885767	2.79217e-17	0.553763	3.66767e-05	0.398461	0.00457263	-0.418694	0.00275268
AGPAT2	darkgreen	-0.314417	0.0277904	0.401089	0.0042883	-0.698472	2.40508e-08	0.315063	0.0274543	0.525911	0.000104122	-0.157686	0.279211	-0.171267	0.239339	0.150462	0.302104	0.277157	0.0538583	-0.148795	0.307552	-0.0826306	0.572449	-0.00359738	0.980429	-0.528981	9.32213e-05	-0.839588	4.78506e-14	-0.325571	0.022445	0.928153	8.33616e-22	0.443891	0.00139909	0.620281	1.99765e-06	-0.399521	0.00445605
RELA	darkgreen	-0.147436	0.312042	0.250122	0.0830375	-0.412244	0.00324699	0.443089	0.00143069	0.412684	0.00321093	-0.277426	0.0536168	-0.213197	0.14134	0.0587303	0.688534	0.299797	0.0363659	0.153564	0.29213	0.166419	0.2531	-0.173566	0.232996	-0.471417	0.000628322	-0.587629	9.03388e-06	-0.315061	0.0274553	0.855743	4.76374e-15	0.542266	5.70571e-05	0.399186	0.00449254	-0.531961	8.36506e-05
CD99	darkgreen	-0.0163487	0.911225	0.181673	0.211553	-0.173822	0.232298	0.128853	0.377574	0.221269	0.126536	-0.059439	0.68497	-0.131789	0.366711	-0.0987133	0.499799	0.151802	0.297769	0.2809	0.0505709	0.317596	0.0261683	-0.333655	0.0191362	-0.286594	0.045883	-0.440959	0.00151778	-0.164489	0.258723	0.71113	1.02804e-08	0.561127	2.73981e-05	0.172487	0.23596	-0.446233	0.00131033
CCDC141	darkgreen	0.475407	0.00055635	-0.461749	0.000838702	0.743949	9.05459e-10	-0.252775	0.0797171	-0.559183	2.96105e-05	0.235788	0.102891	0.322728	0.0237178	-0.186064	0.200533	-0.410243	0.00341553	0.117897	0.419784	0.100836	0.490576	-0.0978666	0.503502	0.254818	0.077232	0.779569	4.12538e-11	0.391358	0.00542515	-0.822458	4.24981e-13	-0.218495	0.131485	-0.418608	0.00275883	0.324511	0.0229127
PLEKHF1	darkgreen	-0.261166	0.0698979	0.502236	0.000235948	-0.684229	5.94974e-08	0.246713	0.0874626	0.518608	0.000134877	-0.117323	0.422066	-0.16313	0.262734	-7.50462e-05	0.999592	0.353577	0.0126943	-0.0895653	0.540535	-0.0292478	0.841878	0.0657797	0.65339	-0.488764	0.000366184	-0.88917	1.42595e-17	-0.26765	0.0629894	0.934865	8.96489e-23	0.479679	0.000487584	0.618404	2.18887e-06	-0.321132	0.0244585
MRPS18A	darkgreen	-0.241717	0.0942775	0.329705	0.0206976	-0.465705	0.000745982	0.255694	0.0761857	0.517333	0.000141024	-0.220415	0.128044	-0.227151	0.116507	0.00999469	0.94566	0.310564	0.0298671	-0.0586156	0.689112	0.0568215	0.698167	-0.167762	0.249237	-0.381637	0.00681509	-0.664024	1.97827e-07	-0.32589	0.0223058	0.863616	1.39521e-15	0.479531	0.000489831	0.280244	0.0511356	-0.544467	5.24931e-05
BCKDHA	darkgreen	-0.323723	0.0232656	0.281465	0.0500891	-0.597313	5.87516e-06	0.349699	0.0137774	0.465946	0.000740642	-0.0528323	0.71845	-0.228838	0.113746	0.221092	0.126847	0.273081	0.057633	-0.0285908	0.845386	-0.0486563	0.73989	0.00349203	0.981002	-0.388606	0.00579093	-0.724068	4.11129e-09	-0.336747	0.0179845	0.899445	1.62831e-18	0.438866	0.00160788	0.542469	5.66203e-05	-0.424792	0.00234779
PSMC3	darkgreen	-0.186068	0.200521	0.331615	0.0199295	-0.496204	0.00028791	0.230683	0.110783	0.488762	0.000366209	-0.11193	0.443858	-0.363071	0.0103462	0.140401	0.335943	0.403448	0.00404647	-0.0145027	0.921215	0.0687958	0.638572	-0.117469	0.421488	-0.498646	0.000265741	-0.719164	5.85347e-09	-0.325269	0.0225778	0.885444	2.97281e-17	0.460769	0.000863195	0.3512	0.0133493	-0.469253	0.000670786
EMC10	darkgreen	-0.197491	0.17377	0.412177	0.00325249	-0.572898	1.69373e-05	0.23588	0.102753	0.492726	0.000322391	-0.0189519	0.89716	-0.148587	0.308237	0.155471	0.286106	0.371778	0.00853149	-0.00323001	0.982427	0.0761159	0.603195	-0.0987932	0.49945	-0.46409	0.000782665	-0.780352	3.83051e-11	-0.28149	0.0500682	0.921365	6.44715e-21	0.502175	0.000236428	0.449497	0.00119499	-0.432835	0.0018948
NAA38	darkgreen	-0.190301	0.190289	0.458893	0.000911929	-0.666266	1.73918e-07	0.165809	0.254869	0.507392	0.00019845	-0.117315	0.4221	-0.092135	0.528932	0.0796093	0.586618	0.436251	0.00172715	0.015618	0.915177	0.103501	0.479126	-0.010705	0.941804	-0.636494	8.84301e-07	-0.884166	3.80248e-17	-0.202632	0.162611	0.924711	2.40936e-21	0.574384	1.59188e-05	0.67953	7.93383e-08	-0.28083	0.0506311
TEX264	darkgreen	-0.290653	0.0427632	0.326985	0.021834	-0.598993	5.44472e-06	0.139149	0.340312	0.574711	1.57022e-05	-0.112044	0.44339	-0.251397	0.0814289	0.0716189	0.624828	0.388182	0.00584924	-0.0882253	0.546634	-0.0156006	0.915272	0.0209778	0.886236	-0.166104	0.254013	-0.65495	3.29556e-07	-0.361854	0.0106246	0.820709	5.24168e-13	0.324265	0.0230224	0.167683	0.249463	-0.503939	0.000222908
PGLS	darkgreen	-0.286633	0.0458528	0.154273	0.289879	-0.438303	0.0016329	0.309724	0.0303368	0.488162	0.000373287	-0.220337	0.128183	-0.321092	0.0244772	0.152307	0.296146	0.297619	0.0378134	-0.0853594	0.559788	0.0503259	0.731294	-0.116169	0.426678	-0.370234	0.00883147	-0.57041	1.87786e-05	-0.369398	0.0089978	0.85184	8.52722e-15	0.411862	0.00327864	0.25141	0.0814122	-0.563616	2.47862e-05
ADCK3	darkgreen	-0.268448	0.0621781	0.259496	0.0717714	-0.564948	2.34846e-05	0.441769	0.00148412	0.414918	0.00303334	-0.269	0.0616228	-0.168209	0.247958	0.0539402	0.712797	0.268786	0.0618379	0.109748	0.452849	0.110394	0.450174	-0.0700687	0.63236	-0.523653	0.000112866	-0.72531	3.75477e-09	-0.279266	0.051986	0.88287	4.86615e-17	0.5561	3.34591e-05	0.688003	4.70348e-08	-0.357848	0.011587
AZGP1	darkgreen	-0.129849	0.373869	0.232556	0.107835	-0.392514	0.00527758	0.315706	0.027123	0.227141	0.116524	-0.167148	0.250997	0.0324126	0.825023	-0.0809339	0.580386	0.147563	0.31162	0.20955	0.148435	0.173405	0.233438	-0.135704	0.352519	-0.435225	0.00177607	-0.669338	1.45523e-07	-0.126998	0.384539	0.767401	1.25954e-10	0.575775	1.50169e-05	0.763687	1.7475e-10	-0.188119	0.195517
WFS1	darkgreen	-0.246329	0.0879725	0.412361	0.00323743	-0.554743	3.52952e-05	0.287434	0.0452228	0.383863	0.00647206	-0.158711	0.276057	-0.0140265	0.923794	-0.075582	0.605746	0.235326	0.103586	0.171819	0.237807	0.134233	0.35781	-0.0206239	0.888142	-0.466826	0.000721445	-0.750274	5.43399e-10	-0.241011	0.0952724	0.886687	2.33307e-17	0.543079	5.53309e-05	0.702112	1.89204e-08	-0.315061	0.0274549
UBAC2	darkgreen	-0.189464	0.192282	0.334314	0.0188855	-0.527109	9.97364e-05	0.247631	0.0862536	0.483011	0.000439379	-0.0774022	0.597068	-0.219278	0.130074	0.166555	0.252707	0.334819	0.0186957	0.0362593	0.804642	0.128387	0.379318	-0.160657	0.270137	-0.581405	1.18258e-05	-0.826535	2.58231e-13	-0.203293	0.161216	0.921129	6.89955e-21	0.574218	1.60297e-05	0.571221	1.81593e-05	-0.308382	0.0311
DUS1L	darkgreen	-0.234088	0.10547	0.338867	0.0172293	-0.529671	9.09202e-05	0.292297	0.0415497	0.437194	0.00168328	-0.20019	0.167845	-0.152975	0.294006	0.110836	0.448353	0.283619	0.0482865	0.056632	0.699126	0.122676	0.401052	-0.207504	0.152528	-0.565363	2.30924e-05	-0.767932	1.20144e-10	-0.255465	0.0764579	0.947613	6.18134e-25	0.560392	2.82161e-05	0.564982	2.34525e-05	-0.389588	0.00565806
ACO2	darkgreen	-0.067287	0.645968	0.460056	0.000881427	-0.540948	5.99598e-05	0.109919	0.452139	0.444263	0.00138463	-0.11813	0.41886	-0.123351	0.398447	-0.129101	0.37665	0.389451	0.00567641	0.124997	0.392133	0.236292	0.102137	0.00929084	0.949481	-0.491167	0.000339026	-0.821615	4.7033e-13	-0.205288	0.157057	0.918371	1.50051e-20	0.603647	4.40019e-06	0.552109	3.91239e-05	-0.317564	0.0261842
PDCD1	darkgreen	-0.210407	0.146745	0.512953	0.000164145	-0.692362	3.56961e-08	0.0481943	0.742275	0.623918	1.67059e-06	0.0937742	0.521595	-0.152486	0.29557	0.136581	0.349387	0.414426	0.00307164	-0.0282911	0.846987	0.0619203	0.672544	-0.00509564	0.97228	-0.421446	0.00256288	-0.831607	1.36444e-13	-0.266277	0.0644053	0.852623	7.59765e-15	0.412189	0.00325153	0.399177	0.00449355	-0.344205	0.0154462
RHOD	darkgreen	-0.249064	0.0843919	0.303272	0.0341521	-0.52473	0.000108616	0.257269	0.0743318	0.383325	0.00655371	-0.157271	0.280492	-0.058374	0.690328	0.0728397	0.618923	0.224312	0.121269	0.0811974	0.57915	0.072466	0.620728	-0.107212	0.46342	-0.605752	3.99149e-06	-0.804185	3.42383e-12	-0.172571	0.235729	0.906599	3.11607e-19	0.575971	1.48931e-05	0.692051	3.64109e-08	-0.264151	0.0666467
CDX1	darkgreen	-0.356917	0.011821	0.451627	0.0011247	-0.670754	1.33946e-07	0.307274	0.0317414	0.580669	1.22038e-05	-0.174496	0.230463	-0.183916	0.20587	0.0550068	0.707369	0.347618	0.0143903	-0.145488	0.318548	-0.0470018	0.74844	-0.0082846	0.954947	-0.381508	0.00683552	-0.816317	8.79027e-13	-0.35384	0.0126238	0.92554	1.87479e-21	0.433103	0.00188112	0.516211	0.000146647	-0.455237	0.00101399
C12orf57	darkgreen	-0.171643	0.238294	0.413527	0.00314289	-0.568949	1.99439e-05	0.217707	0.132917	0.374848	0.00796079	-0.157166	0.28082	-0.0437523	0.76532	0.0124289	0.932453	0.261987	0.0689915	0.079999	0.584782	0.183725	0.206351	-0.142635	0.328232	-0.531345	8.55517e-05	-0.742637	1.00473e-09	-0.218524	0.131432	0.907228	2.67733e-19	0.616551	2.39408e-06	0.628408	1.33548e-06	-0.375895	0.00777391
ARRDC2	darkgreen	-0.31887	0.0255412	0.157441	0.279969	-0.49296	0.000319958	0.205741	0.156122	0.474736	0.000567905	-0.0650043	0.657221	-0.190045	0.190897	0.133486	0.360518	0.320685	0.0246695	0.0476481	0.745097	0.0559474	0.702594	-0.164553	0.258536	-0.456748	0.000970645	-0.784516	2.56785e-11	-0.185602	0.201672	0.893988	5.30028e-18	0.522239	0.000118678	0.486274	0.000396395	-0.292743	0.0412251
TMEM222	darkgreen	-0.28801	0.0447742	0.36161	0.0106812	-0.631623	1.13523e-06	0.322609	0.0237722	0.503167	0.00022874	-0.160709	0.269979	-0.121405	0.405989	0.0569903	0.697313	0.276733	0.0542419	-0.0367835	0.801874	-0.0313685	0.830575	0.0303559	0.835968	-0.49968	0.00025683	-0.843761	2.70377e-14	-0.278332	0.0528086	0.925464	1.91833e-21	0.494221	0.000307134	0.617775	2.25655e-06	-0.375558	0.00783376
HDAC11	darkgreen	-0.442456	0.00145611	0.37969	0.00712813	-0.786098	2.20099e-11	0.384305	0.00640581	0.644569	5.78846e-07	-0.2285	0.114295	-0.296947	0.0382693	0.259336	0.0719539	0.451095	0.00114192	-0.152618	0.295148	-0.156181	0.283883	0.0789263	0.589843	-0.483363	0.000434547	-0.828925	1.91691e-13	-0.431634	0.00195709	0.925856	1.70213e-21	0.327848	0.0214679	0.520832	0.000124732	-0.45532	0.00101157
SUMF2	darkgreen	-0.0886014	0.544919	0.294048	0.0402883	-0.368551	0.00916895	0.316238	0.0268514	0.223463	0.122721	-0.0883225	0.546191	-0.0809882	0.580132	-0.0146579	0.920374	0.143867	0.32403	0.270809	0.0598274	0.27172	0.0589402	-0.216504	0.135127	-0.378151	0.00738419	-0.530333	8.8762e-05	-0.23468	0.104566	0.80942	1.92691e-12	0.563776	2.46264e-05	0.421505	0.002559	-0.467764	0.000701468
ARFGAP2	darkgreen	-0.320062	0.0249659	-0.0521602	0.721887	-0.319713	0.0251331	0.405922	0.00380585	0.40225	0.00416774	-0.3338	0.0190808	-0.323409	0.0234074	0.063382	0.665265	0.243046	0.0924259	0.0311457	0.831761	0.0464357	0.751373	-0.0440438	0.763801	-0.360501	0.0109415	-0.4912	0.00033866	-0.328659	0.0211284	0.803193	3.81045e-12	0.458779	0.000914953	0.327637	0.0215568	-0.496936	0.000281101
EFHD1	darkgreen	-0.393229	0.0051881	0.482883	0.000441155	-0.725026	3.83371e-09	0.395017	0.00497012	0.555303	3.45262e-05	-0.33546	0.0184566	-0.251296	0.0815559	0.140693	0.33493	0.273068	0.0576452	-0.132676	0.363466	-0.0250745	0.864211	0.0235793	0.872238	-0.450746	0.00115333	-0.765475	1.49377e-10	-0.397443	0.00468709	0.91155	9.16115e-20	0.411799	0.0032838	0.521797	0.000120551	-0.487607	0.000379951
SRM	darkgreen	-0.106379	0.466922	0.48866	0.000367401	-0.535678	7.29707e-05	0.155921	0.284696	0.446136	0.0013139	-0.122342	0.402348	-0.16699	0.251454	-0.00160192	0.991284	0.305581	0.0327434	-0.00729797	0.960308	0.163345	0.262096	-0.141493	0.332161	-0.505547	0.000211198	-0.727775	3.1317e-09	-0.279694	0.0516119	0.899587	1.57769e-18	0.517825	0.000138621	0.42047	0.00262882	-0.428879	0.00210684
C19orf70	darkgreen	-0.272954	0.0577544	0.320342	0.0248322	-0.5534	3.72017e-05	0.411253	0.00332953	0.481444	0.000461482	-0.237069	0.100981	-0.269668	0.0609542	0.174456	0.230572	0.427796	0.00216848	0.0647994	0.658235	0.028171	0.847629	-0.092291	0.528232	-0.492598	0.000323724	-0.699407	2.26209e-08	-0.363882	0.0101641	0.920918	7.32858e-21	0.460086	0.000880671	0.424097	0.00239108	-0.519707	0.00012977
KLHDC9	darkgreen	-0.214138	0.13955	0.440884	0.0015209	-0.749983	5.5651e-10	0.305993	0.0324971	0.571986	1.75924e-05	-0.0943552	0.519007	-0.132301	0.364835	0.166033	0.254218	0.410777	0.0033698	-0.165887	0.254644	-0.169697	0.24374	0.135365	0.353733	-0.581646	1.17043e-05	-0.813866	1.16615e-12	-0.325907	0.0222988	0.835228	8.54108e-14	0.380215	0.00704252	0.517396	0.000140712	-0.398772	0.00453807
ATG101	darkgreen	-0.199658	0.169002	0.317152	0.0263899	-0.536479	7.08405e-05	0.286245	0.0461604	0.493614	0.000313251	-0.162728	0.263928	-0.218384	0.131685	0.0450684	0.75847	0.348411	0.0141542	0.0904987	0.536306	0.133156	0.361717	-0.0496184	0.734933	-0.492189	0.000328029	-0.704995	1.56064e-08	-0.342263	0.016076	0.941463	7.84049e-24	0.512376	0.000167436	0.468305	0.000690174	-0.478273	0.000509314
HPS6	darkgreen	-0.179078	0.21826	0.556952	3.23514e-05	-0.655595	3.17986e-07	0.0960513	0.511488	0.468845	0.000679068	-0.0494313	0.735896	-0.0035064	0.980923	0.0435097	0.766584	0.302342	0.0347338	-0.032489	0.824617	0.124539	0.393885	-0.104537	0.474713	-0.574025	1.61596e-05	-0.87154	3.74341e-16	-0.20348	0.160822	0.87647	1.57915e-16	0.517587	0.000139777	0.659908	2.49896e-07	-0.253529	0.0787927
KEAP1	darkgreen	-0.151006	0.300339	0.383014	0.00660116	-0.515586	0.000149864	0.0826271	0.572465	0.522642	0.000116992	0.00934307	0.949198	-0.0906233	0.535743	0.096354	0.510152	0.311343	0.0294374	0.111558	0.445384	0.214645	0.138592	-0.20433	0.159044	-0.484613	0.000417779	-0.822001	4.4902e-13	-0.161851	0.266545	0.918006	1.65923e-20	0.582479	1.12932e-05	0.456851	0.000967742	-0.312463	0.0288281
WNT7B	darkgreen	-0.234153	0.10537	0.552798	3.8086e-05	-0.73241	2.21465e-09	0.205027	0.157597	0.577102	1.42004e-05	-0.0848329	0.56222	-0.248354	0.0853099	0.0794748	0.587253	0.409786	0.00345499	-0.174474	0.230524	-0.0688032	0.638536	0.24531	0.0893366	-0.451013	0.00114458	-0.777216	5.14736e-11	-0.386073	0.00614656	0.787982	1.82845e-11	0.249088	0.0843607	0.447195	0.00127532	-0.356732	0.0118679
TRIM28	darkgreen	-0.172669	0.235458	0.296053	0.0388825	-0.424025	0.00239565	0.177215	0.223167	0.489681	0.000355596	-0.0332366	0.820647	-0.160822	0.269637	0.0544802	0.710047	0.227489	0.11595	-0.0149515	0.918785	0.126062	0.388081	-0.113738	0.436486	-0.312996	0.028542	-0.697792	2.51429e-08	-0.23845	0.0989514	0.886066	2.63421e-17	0.524562	0.000109267	0.352476	0.0129943	-0.442578	0.00145117
CHKB	darkgreen	-0.211314	0.144971	0.11712	0.422876	-0.353092	0.0128258	0.212994	0.141727	0.296742	0.0384095	-0.128167	0.380142	0.0644565	0.659933	-0.0783849	0.592405	0.148115	0.309793	0.15268	0.294951	0.219506	0.129665	-0.306248	0.0323461	-0.275349	0.0555072	-0.652107	3.85352e-07	-0.0498875	0.733548	0.773815	7.05399e-11	0.597749	5.76051e-06	0.526198	0.000103056	-0.206142	0.1553
ETHE1	darkgreen	-0.224017	0.121772	0.348466	0.0141378	-0.513287	0.000162263	0.0824333	0.573369	0.463481	0.000796902	0.108333	0.458728	-0.0679876	0.642529	0.0846463	0.563084	0.327285	0.0217059	-0.0330693	0.821535	0.0108096	0.941236	0.0761502	0.603031	-0.424875	0.00234267	-0.794816	9.18556e-12	-0.16991	0.243138	0.883963	3.95291e-17	0.483918	0.000427034	0.512759	0.000165242	-0.2926	0.0413287
GCDH	darkgreen	-0.273055	0.0576576	0.326436	0.0220694	-0.585758	9.80147e-06	0.165069	0.257025	0.521386	0.000122313	-0.112404	0.441917	-0.174248	0.231138	-0.0313525	0.83066	0.394487	0.00503382	0.00114887	0.993749	0.0157556	0.914433	-0.0453536	0.756988	-0.431135	0.00198348	-0.819762	5.86694e-13	-0.25809	0.0733795	0.923189	3.79057e-21	0.472464	0.000608665	0.481791	0.000456503	-0.356572	0.0119088
AP2A2	darkgreen	-0.0398756	0.785598	0.403281	0.0040632	-0.415753	0.00296918	0.154182	0.290167	0.393532	0.00515054	0.0927248	0.526286	-0.00936201	0.949095	-0.0597651	0.683332	0.317276	0.0263283	0.245749	0.0887464	0.176661	0.22464	-0.0933358	0.523553	-0.487477	0.000381522	-0.845822	2.02682e-14	-0.0747383	0.609787	0.893045	6.45632e-18	0.622529	1.78919e-06	0.584444	1.03758e-05	-0.184545	0.204299
FBXL15	darkgreen	-0.293706	0.0405323	0.257245	0.0743594	-0.53114	8.6194e-05	0.187997	0.195812	0.549697	4.29611e-05	-0.101091	0.489476	-0.299232	0.0367371	0.20042	0.167347	0.406455	0.00375561	-0.0361243	0.805355	0.0635667	0.664347	-0.157095	0.281038	-0.343089	0.0158055	-0.690612	3.98987e-08	-0.294356	0.0400699	0.860735	2.20568e-15	0.424635	0.00235749	0.244305	0.0906973	-0.46449	0.000773437
CCDC130	darkgreen	-0.394155	0.00507415	0.281569	0.0500006	-0.66396	1.98552e-07	0.314979	0.0274974	0.476583	0.000536599	-0.0631094	0.66662	-0.154043	0.290609	0.171749	0.238	0.258059	0.0734154	-0.0413651	0.777789	-0.0361649	0.80514	-0.165672	0.255268	-0.252285	0.0803232	-0.747358	6.88887e-10	-0.290643	0.0427703	0.8512	9.3668e-15	0.369504	0.0089766	0.448913	0.00121495	-0.364994	0.00991896
PRPF6	darkgreen	-0.173364	0.23355	0.326332	0.0221146	-0.51113	0.000174743	0.104089	0.476619	0.467846	0.000699746	-0.049712	0.734451	-0.0847256	0.562717	0.0538186	0.713417	0.336343	0.0181315	0.04267	0.770966	0.0890322	0.542958	-0.16825	0.247841	-0.571952	1.76171e-05	-0.867031	7.99526e-16	-0.118997	0.415429	0.873738	2.55873e-16	0.588655	8.63704e-06	0.572231	1.74142e-05	-0.206811	0.153934
MRPS34	darkgreen	-0.252535	0.080013	0.377578	0.00748144	-0.592793	7.19433e-06	0.318417	0.0257627	0.586491	9.494e-06	-0.176357	0.225452	-0.28898	0.0440271	0.175347	0.228163	0.420269	0.00264265	-0.0704667	0.630423	-0.0145957	0.920711	-0.0174952	0.905027	-0.427772	0.00216984	-0.749852	5.62482e-10	-0.34843	0.0141485	0.921168	6.82258e-21	0.434744	0.00179938	0.381693	0.00680634	-0.461898	0.000835014
FBL	darkgreen	-0.147966	0.310284	0.290884	0.0425908	-0.421282	0.00257388	0.151104	0.30002	0.349855	0.0137323	-0.0729282	0.618496	-0.0034361	0.981306	-0.0770854	0.598574	0.208843	0.149841	0.168848	0.246142	0.247307	0.0866794	-0.11223	0.442631	-0.472995	0.000598908	-0.729629	2.72877e-09	-0.118948	0.415625	0.898413	2.04606e-18	0.664421	1.93375e-07	0.632055	1.11052e-06	-0.277822	0.0532625
SLC37A2	darkgreen	-0.501526	0.00024159	0.484159	0.000423795	-0.785642	2.30133e-11	0.497736	0.000273818	0.499231	0.000260666	-0.316784	0.0265752	-0.296999	0.0382335	0.210091	0.147365	0.332861	0.0194419	-0.285314	0.0469048	-0.328953	0.0210063	0.126474	0.386519	-0.356521	0.0119219	-0.778856	4.41301e-11	-0.456795	0.000969301	0.852763	7.44101e-15	0.248544	0.0850636	0.541596	5.85146e-05	-0.45838	0.000925674
ABCA3	darkgreen	-0.328667	0.0211252	0.458094	0.000933418	-0.716955	6.84684e-09	0.233364	0.106582	0.569056	1.98566e-05	-0.204435	0.158826	-0.181245	0.212649	0.0828372	0.571485	0.36443	0.0100427	-0.0803565	0.583099	-0.0118401	0.935645	0.0382896	0.793935	-0.41831	0.00278014	-0.844656	2.38708e-14	-0.336933	0.0179171	0.912929	6.43187e-20	0.39328	0.00518178	0.497341	0.000277393	-0.382382	0.00669868
C14orf1	darkgreen	-0.124136	0.395428	0.382174	0.00673096	-0.488791	0.000365872	0.180737	0.213955	0.380105	0.00706029	-0.14306	0.326777	0.00299279	0.983717	0.000236396	0.998714	0.265557	0.0651576	0.0220075	0.880691	0.109272	0.454823	-0.105375	0.471162	-0.660168	2.46256e-07	-0.849	1.28915e-14	-0.108333	0.45873	0.900903	1.17458e-18	0.649323	4.48431e-07	0.725413	3.72649e-09	-0.229921	0.111999
HSD11B2	darkgreen	-0.458213	0.00093018	0.366221	0.00965462	-0.736483	1.62358e-09	0.516949	0.000142924	0.502184	0.000236363	-0.434552	0.0018088	-0.382541	0.00667406	0.200298	0.167611	0.335559	0.0184199	-0.167515	0.249944	-0.176911	0.223973	0.125782	0.389145	-0.346816	0.0146328	-0.676628	9.45268e-08	-0.521248	0.000122914	0.881891	5.85194e-17	0.284286	0.0477385	0.504852	0.000216189	-0.54154	5.86398e-05
LPO	darkgreen	-0.21134	0.144921	0.174586	0.23022	-0.403383	0.004053	0.368656	0.00914768	0.343076	0.0158097	-0.250988	0.0819421	-0.21312	0.141487	-0.0200465	0.891255	0.273135	0.057582	0.133964	0.358783	0.145786	0.317548	-0.0269445	0.854189	-0.470869	0.000638841	-0.592791	7.19483e-06	-0.300419	0.0359614	0.848554	1.37437e-14	0.526983	0.000100191	0.559932	2.87393e-05	-0.420556	0.00262297
TSPAN33	darkgreen	-0.0934493	0.523045	0.361307	0.0107517	-0.554989	3.49555e-05	0.251904	0.0807956	0.471315	0.000630262	-0.128295	0.379663	-0.108109	0.459664	0.042672	0.770955	0.335949	0.0182761	0.0340139	0.816524	0.0999908	0.494239	-0.0929354	0.525343	-0.70011	2.15986e-08	-0.835219	8.55102e-14	-0.198816	0.170842	0.935723	6.62736e-23	0.635669	9.22809e-07	0.619753	2.04982e-06	-0.338097	0.0175005
TRIB3	darkgreen	-0.156284	0.283562	0.531142	8.61881e-05	-0.62487	1.59361e-06	0.176716	0.224493	0.411696	0.00329242	-0.199331	0.169714	-0.0795014	0.587127	-0.0256585	0.861079	0.335988	0.0182616	-0.0466471	0.750278	0.0607449	0.67842	0.0829153	0.571122	-0.554444	3.57114e-05	-0.736318	1.64429e-09	-0.303666	0.0339082	0.832381	1.23554e-13	0.429004	0.00209983	0.591082	7.76144e-06	-0.391538	0.00540191
LOC100505938	darkgreen	-0.610103	3.25598e-06	0.294685	0.039837	-0.789647	1.54983e-11	0.432016	0.00193706	0.692932	3.44188e-08	-0.23055	0.110993	-0.434185	0.00182688	0.335945	0.0182774	0.459013	0.000908724	-0.333731	0.0191069	-0.339967	0.0168482	0.348286	0.0141911	-0.172901	0.234818	-0.724126	4.09375e-09	-0.515787	0.000148822	0.845062	2.25533e-14	0.153325	0.292889	0.386636	0.00606595	-0.510236	0.000180167
ASCL2	darkgreen	-0.343572	0.0156489	0.447546	0.00126278	-0.759926	2.41966e-10	0.337263	0.0177982	0.548607	4.48051e-05	-0.246168	0.0881876	-0.304163	0.0336028	0.301644	0.0351752	0.444374	0.00138035	-0.128545	0.378728	-0.0952055	0.515231	0.0481687	0.742407	-0.599833	5.24053e-06	-0.761035	2.1996e-10	-0.413886	0.00311426	0.898772	1.89007e-18	0.365944	0.00971364	0.525415	0.000105988	-0.477582	0.000520314
DOCK6	darkgreen	-0.290422	0.0429355	0.347342	0.0144733	-0.665511	1.81645e-07	0.28362	0.0482857	0.562196	2.62462e-05	-0.0750035	0.608516	-0.174431	0.23064	0.14725	0.31266	0.289551	0.043592	-0.0375216	0.797981	-0.0404316	0.78268	-0.00428152	0.976707	-0.426864	0.00222273	-0.805828	2.86389e-12	-0.310189	0.0300762	0.913541	5.48698e-20	0.415192	0.00301214	0.482979	0.000439825	-0.368911	0.00909593
CD82	darkgreen	-0.176248	0.225743	0.458604	0.00091963	-0.5803	1.23978e-05	0.123179	0.399111	0.519979	0.000128536	0.00587745	0.968029	-0.125993	0.388343	0.035136	0.810581	0.340514	0.0166613	0.0843796	0.564318	0.153494	0.29235	-0.077485	0.596674	-0.520927	0.000124315	-0.771594	8.64092e-11	-0.249939	0.0832706	0.91055	1.17973e-19	0.50536	0.00021253	0.480733	0.00047184	-0.370104	0.00885721
PI4KA	darkgreen	-0.144199	0.3229	0.226065	0.118311	-0.39626	0.00482323	0.241212	0.0949882	0.326693	0.021959	-0.0355049	0.80863	-0.00818215	0.955503	0.00778935	0.957637	0.162516	0.26456	0.168055	0.248398	0.2257	0.118923	-0.241669	0.0943446	-0.421689	0.00254675	-0.707696	1.30034e-08	-0.0996508	0.495715	0.834243	9.71176e-14	0.605997	3.94639e-06	0.664224	1.95575e-07	-0.195771	0.177624
C1orf35	darkgreen	-0.265576	0.0651376	0.413594	0.00313753	-0.67041	1.36675e-07	0.351284	0.0133257	0.561801	2.6667e-05	-0.196333	0.176358	-0.199028	0.170377	0.131703	0.367027	0.375267	0.00788553	0.00712375	0.961254	0.0182733	0.900823	-0.0956146	0.513419	-0.534061	7.74532e-05	-0.859548	2.6559e-15	-0.315405	0.0272773	0.956248	9.863e-27	0.489486	0.000357825	0.573382	1.65993e-05	-0.395246	0.00494274
ENDOG	darkgreen	-0.245906	0.0885373	0.462538	0.000819409	-0.607044	3.7584e-06	0.0343333	0.814831	0.581191	1.19347e-05	-0.0591452	0.686446	-0.125405	0.390578	0.0331876	0.820907	0.350718	0.0134854	-0.0521675	0.721849	0.0751483	0.607822	-0.0940418	0.520403	-0.334828	0.0186923	-0.753136	4.29138e-10	-0.248866	0.0846476	0.844833	2.32874e-14	0.43176	0.00195043	0.311325	0.0294472	-0.406693	0.00373339
ATRIP	darkgreen	-0.205452	0.156718	0.383081	0.00659094	-0.596297	6.15044e-06	0.195109	0.179124	0.529055	9.29714e-05	0.0330043	0.82188	-0.106522	0.46632	0.109847	0.452439	0.368431	0.00919356	0.0967123	0.508573	0.0840254	0.565961	-0.12313	0.399298	-0.593555	6.95423e-06	-0.915826	2.99991e-20	-0.163716	0.261	0.943246	3.86606e-24	0.569346	1.96214e-05	0.609641	3.3276e-06	-0.24768	0.0861888
MYL10	darkgreen	-0.38246	0.00668652	0.514792	0.000154044	-0.739811	1.25457e-09	0.270126	0.0605006	0.555961	3.36433e-05	-0.130231	0.372452	-0.168988	0.245743	0.156431	0.283104	0.375084	0.0079184	-0.153283	0.293024	-0.16628	0.253504	0.0757482	0.604951	-0.471404	0.000628576	-0.848025	1.48275e-14	-0.352581	0.0129653	0.874856	2.10314e-16	0.326592	0.0220025	0.564337	2.40736e-05	-0.374013	0.00811258
[truncated: 4,834 more rows]
